# Supplementary material for: SexAnnoDB, a knowledgebase of sex-specific regulations from multi-omics data of human cancers
Source: Biol Sex Differ. 2024 Aug 22;15:64. doi: 10.1186/s13293-024-00638-8 (PMC11342657; doi:10.1186/s13293-024-00638-8)
Supplement: Supplementary file 1 — Supplementary Material 1 [file 13293_2024_638_MOESM1_ESM.xlsx]

## Sheet: Table 1
Cancer	turmol_male	turmol_female	normal_male	normal_female	Experimental Strategy
ACC	31	48	0	0	Methylation Array
BLCA	305	109	9	8	Methylation Array
BRCA	9	784	0	84	Methylation Array
CHOL	16	20	6	3	Methylation Array
COAD	166	145	11	8	Methylation Array
DLBC	22	26	0	0	Methylation Array
ESCA	139	23	6	3	Methylation Array
GBM	35	27	0	0	Methylation Array
HNSC	368	134	15	5	Methylation Array
KICH	39	26	0	0	Methylation Array
KIRC	211	112	18	6	Methylation Array
KIRP	201	73	15	8	Methylation Array
LAML	80	68	0	0	Methylation Array
LGG	289	239	0	0	Methylation Array
LIHC	253	121	23	18	Methylation Array
LUAD	217	253	14	7	Methylation Array
LUSC	274	96	7	0	Methylation Array
MESO	71	15	0	0	Methylation Array
PAAD	98	80	2	2	Methylation Array
PCPG	81	102	2	1	Methylation Array
READ	54	44	1	1	Methylation Array
SARC	119	144	0	0	Methylation Array
SKCM	292	179	1	0	Methylation Array
STAD	220	118	0	0	Methylation Array
THCA	139	371	14	35	Methylation Array
THYM	62	57	0	2	Methylation Array
UVM	45	35	0	0	Methylation Array
ACC	31	48	0	0	miRNA-Seq
BLCA	305	108	10	9	miRNA-Seq
BRCA	12	1084	1	103	miRNA-Seq
CHOL	16	20	6	3	miRNA-Seq
COAD	236	216	2	6	miRNA-Seq
DLBC	22	25	0	0	miRNA-Seq
ESCA	141	23	8	3	miRNA-Seq
GBM	0	0	0	0	miRNA-Seq
HNSC	364	133	30	14	miRNA-Seq
KICH	39	26	12	12	miRNA-Seq
KIRC	355	185	52	19	miRNA-Seq
KIRP	212	77	22	10	miRNA-Seq
LAML	83	68	0	0	miRNA-Seq
LGG	285	239	0	0	miRNA-Seq
LIHC	252	118	28	22	miRNA-Seq
LUAD	239	276	8	12	miRNA-Seq
LUSC	352	123	28	10	miRNA-Seq
MESO	71	15	0	0	miRNA-Seq
PAAD	98	80	2	2	miRNA-Seq
PCPG	81	102	2	1	miRNA-Seq
READ	87	73	0	3	miRNA-Seq
SARC	119	142	0	0	miRNA-Seq
SKCM	278	171	1	0	miRNA-Seq
STAD	246	133	23	11	miRNA-Seq
THCA	139	370	17	41	miRNA-Seq
THYM	62	57	0	2	miRNA-Seq
UVM	45	35	0	0	miRNA-Seq
ACC	18	28	0	0	Reverse Phase Protein Array
BLCA	255	84	0	0	Reverse Phase Protein Array
BRCA	9	869	0	27	Reverse Phase Protein Array
CHOL	13	17	0	0	Reverse Phase Protein Array
COAD	184	174	0	0	Reverse Phase Protein Array
DLBC	18	15	0	0	Reverse Phase Protein Array
ESCA	91	14	0	0	Reverse Phase Protein Array
GBM	50	31	0	0	Reverse Phase Protein Array
HNSC	246	93	0	0	Reverse Phase Protein Array
KICH	38	25	0	0	Reverse Phase Protein Array
KIRC	315	157	0	0	Reverse Phase Protein Array
KIRP	158	56	0	0	Reverse Phase Protein Array
LGG	238	192	0	0	Reverse Phase Protein Array
LIHC	112	69	0	0	Reverse Phase Protein Array
LUAD	165	195	0	0	Reverse Phase Protein Array
LUSC	246	79	0	0	Reverse Phase Protein Array
MESO	49	12	0	0	Reverse Phase Protein Array
PAAD	60	52	0	0	Reverse Phase Protein Array
PCPG	41	40	0	0	Reverse Phase Protein Array
READ	69	59	0	0	Reverse Phase Protein Array
SARC	105	119	0	0	Reverse Phase Protein Array
SKCM	208	141	0	0	Reverse Phase Protein Array
STAD	200	101	0	0	Reverse Phase Protein Array
THCA	110	267	0	0	Reverse Phase Protein Array
THYM	45	41	0	0	Reverse Phase Protein Array
UVM	12	0	0	0	Reverse Phase Protein Array
ACC	31	48	0	0	RNA-Seq
BLCA	305	109	10	9	RNA-Seq
BRCA	12	1096	1	112	RNA-Seq
CHOL	16	20	6	3	RNA-Seq
COAD	252	226	20	21	RNA-Seq
DLBC	22	26	0	0	RNA-Seq
ESCA	139	23	8	3	RNA-Seq
GBM	109	59	0	0	RNA-Seq
HNSC	368	134	30	14	RNA-Seq
KICH	39	26	12	12	RNA-Seq
KIRC	353	186	52	20	RNA-Seq
KIRP	212	77	22	10	RNA-Seq
LAML	83	68	0	0	RNA-Seq
LGG	289	239	0	0	RNA-Seq
LIHC	253	121	28	22	RNA-Seq
LUAD	249	286	25	34	RNA-Seq
LUSC	371	131	35	14	RNA-Seq
MESO	71	15	0	0	RNA-Seq
PAAD	98	80	2	2	RNA-Seq
PCPG	81	102	2	1	RNA-Seq
READ	91	75	3	7	RNA-Seq
SARC	119	144	1	1	RNA-Seq
SKCM	292	179	1	0	RNA-Seq
STAD	241	134	22	10	RNA-Seq
THCA	139	371	17	41	RNA-Seq
THYM	62	57	0	2	RNA-Seq
UVM	45	35	0	0	RNA-Seq

## Sheet: Table 2
Gene ID	Gene Name	Drug Target	Sex-biased mRNA	Sex-biased Methylation	Sex-biased RNA editing	Sex-biased Exon skipping	Sex-biased Protein	Sex-biased Mutation
ENSG00000097007	ABL1	Y	-	-	-	-	-	-
ENSG00000037280	FLT4	Y	-	-	-	-	-	-
ENSG00000101162	TUBB1	Y	-	-	-	-	-	-
ENSG00000102755	FLT1	Y	-	-	-	-	-	-
ENSG00000171105	INSR	Y	-	-	Y	-	-	-
ENSG00000169397	RNASE3	Y	-	-	-	-	-	-
ENSG00000156738	MS4A1	Y	Y	-	-	-	-	-
ENSG00000169297	NR0B1	Y	Y	Y	-	-	-	-
ENSG00000165704	HPRT1	Y	-	Y	-	-	-	-
ENSG00000169442	CD52	Y	-	-	-	-	-	-
ENSG00000055118	KCNH2	Y	Y	-	-	-	-	-
ENSG00000070501	POLB	Y	-	-	-	-	-	-
ENSG00000091831	ESR1	Y	Y	-	-	-	-	-
ENSG00000169083	AR	Y	-	Y	-	-	Y	-
ENSG00000138039	LHCGR	Y	-	-	-	-	-	-
ENSG00000196230	TUBB	Y	-	-	-	-	-	-
ENSG00000122025	FLT3	Y	-	-	-	-	-	-
ENSG00000196664	TLR7	Y	-	Y	-	-	-	-
ENSG00000112715	VEGFA	Y	-	-	-	-	-	-
ENSG00000005156	LIG3	Y	-	-	-	-	-	-
ENSG00000043591	ADRB1	Y	-	-	-	-	-	-
ENSG00000012124	CD22	Y	-	-	Y	-	-	Y
ENSG00000144749	LRIG1	Y	-	-	-	-	-	-
ENSG00000109163	GNRHR	Y	-	-	-	-	-	-
ENSG00000113721	PDGFRB	Y	-	-	-	-	Y	Y
ENSG00000017260	ATP2C1	Y	-	-	-	-	-	-
ENSG00000171791	BCL2	Y	-	-	-	-	Y	-
ENSG00000108849	PPY	Y	Y	-	-	-	-	-
ENSG00000073756	PTGS2	Y	Y	-	-	-	-	-
ENSG00000142910	TINAGL1	Y	Y	-	-	-	-	-
ENSG00000178394	HTR1A	Y	-	-	-	-	-	-
ENSG00000104267	CA2	Y	Y	-	-	-	-	-
ENSG00000176890	TYMS	Y	-	-	-	-	-	-
ENSG00000167325	RRM1	Y	-	-	-	-	Y	-
ENSG00000134640	MTNR1B	Y	-	-	-	-	-	-
ENSG00000228716	DHFR	Y	-	-	-	-	-	-
ENSG00000002726	AOC1	Y	Y	-	-	-	-	-
ENSG00000171094	ALK	Y	-	-	-	-	-	-
ENSG00000128052	KDR	Y	-	-	-	-	Y	-
ENSG00000128059	PPAT	Y	-	-	-	-	-	-
ENSG00000159110	IFNAR2	Y	-	-	-	-	-	-
ENSG00000198668	CALM1	Y	-	Y	-	-	-	-
ENSG00000135046	ANXA1	Y	Y	-	-	-	-	-
ENSG00000142208	AKT1	Y	-	-	-	-	Y	-
ENSG00000151067	CACNA1C	Y	-	-	-	-	-	-
ENSG00000143322	ABL2	Y	-	-	-	-	-	-
ENSG00000157404	KIT	Y	Y	-	-	-	-	-
ENSG00000091513	TF	Y	Y	-	-	-	-	-
ENSG00000141736	ERBB2	Y	-	-	-	-	Y	-
ENSG00000101868	POLA1	Y	-	Y	-	-	-	Y
ENSG00000082175	PGR	Y	Y	Y	-	-	-	-
ENSG00000196139	AKR1C3	Y	Y	-	-	-	-	-
ENSG00000157764	BRAF	Y	-	-	-	-	Y	-
ENSG00000162368	CMPK1	Y	-	-	-	-	-	-
ENSG00000100385	IL2RB	Y	Y	-	-	-	-	-
ENSG00000134460	IL2RA	Y	Y	-	-	-	-	-
ENSG00000142166	IFNAR1	Y	-	-	-	-	-	-
ENSG00000105383	CD33	Y	-	-	-	-	-	-
ENSG00000129214	SHBG	Y	-	-	-	-	-	-
ENSG00000113578	FGF1	Y	Y	-	-	-	-	-
ENSG00000169252	ADRB2	Y	-	-	-	-	-	-
ENSG00000232810	TNF	Y	Y	-	-	-	-	-
ENSG00000150337	FCGR1A	Y	-	-	-	-	-	-
ENSG00000014138	POLA2	Y	-	-	Y	-	-	-
ENSG00000131747	TOP2A	Y	Y	-	-	-	-	-
ENSG00000066468	FGFR2	Y	-	-	-	-	-	-
ENSG00000146648	EGFR	Y	Y	-	-	-	Y	Y
ENSG00000061938	TNK2	Y	-	-	-	-	-	-
ENSG00000160752	FDPS	Y	Y	-	Y	Y	-	-
ENSG00000103222	ABCC1	Y	-	-	-	-	-	-
ENSG00000140009	ESR2	Y	-	-	-	-	-	-
ENSG00000113580	NR3C1	Y	-	-	-	-	-	-
ENSG00000135312	HTR1B	Y	-	-	-	-	-	-
ENSG00000197122	SRC	Y	-	-	-	-	Y	-
ENSG00000010810	FYN	Y	-	-	-	-	-	-
ENSG00000176105	YES1	Y	-	-	-	-	-	-
ENSG00000142627	EPHA2	Y	-	-	-	-	-	-
ENSG00000182866	LCK	Y	Y	-	-	-	Y	-
ENSG00000134853	PDGFRA	Y	-	Y	-	-	-	-
ENSG00000182578	CSF1R	Y	-	-	-	-	-	-
ENSG00000140443	IGF1R	Y	-	Y	-	-	-	-
ENSG00000169032	MAP2K1	Y	-	-	-	-	Y	-
ENSG00000159131	GART	Y	-	-	-	-	-	-
ENSG00000189171	S100A13	Y	-	-	-	-	-	-
ENSG00000163599	CTLA4	Y	Y	-	-	-	Y	-
ENSG00000173757	STAT5B	Y	-	-	-	-	-	-
ENSG00000130816	DNMT1	Y	-	-	-	-	Y	-
ENSG00000105664	COMP	Y	Y	Y	-	-	-	-
ENSG00000162747	FCGR3B	Y	Y	-	-	-	-	-
ENSG00000117877	CD3EAP	Y	-	-	-	-	-	-
ENSG00000175899	A2M	Y	-	Y	-	-	-	-
ENSG00000105976	MET	Y	Y	-	-	-	-	-
ENSG00000136244	IL6	Y	Y	-	-	-	Y	-
ENSG00000121966	CXCR4	Y	-	-	-	-	-	-
ENSG00000100030	MAPK1	Y	-	-	-	-	Y	-
ENSG00000144852	NR1I2	Y	-	-	-	-	-	-
ENSG00000198900	TOP1	Y	-	-	-	-	-	-
ENSG00000105329	TGFB1	Y	-	-	-	-	-	-
ENSG00000168036	CTNNB1	Y	-	-	-	-	-	Y
ENSG00000188778	ADRB3	Y	-	-	-	-	-	-
ENSG00000112062	MAPK14	Y	-	-	-	-	-	-
ENSG00000110092	CCND1	Y	Y	-	-	-	-	-
ENSG00000185291	IL3RA	Y	-	-	-	-	-	-
ENSG00000198400	NTRK1	Y	-	-	-	-	-	-
ENSG00000177606	JUN	Y	-	-	-	-	-	-
ENSG00000125538	IL1B	Y	Y	-	-	-	-	-
ENSG00000131979	GCH1	Y	-	-	-	-	-	-
ENSG00000102882	MAPK3	Y	-	-	-	-	-	-
ENSG00000123374	CDK2	Y	-	-	-	-	-	-
ENSG00000109320	NFKB1	Y	-	-	-	-	-	-
ENSG00000111142	METAP2	Y	-	-	-	-	-	-
ENSG00000014257	ACPP	Y	-	-	-	-	-	-
ENSG00000165731	RET	Y	Y	-	-	-	-	-
ENSG00000204580	DDR1	Y	-	-	-	-	Y	-
ENSG00000154229	PRKCA	Y	-	-	-	-	-	-
ENSG00000047457	CP	Y	Y	-	-	-	-	-
ENSG00000104365	IKBKB	Y	-	-	Y	-	-	-
ENSG00000160307	S100B	Y	Y	-	-	-	-	-
ENSG00000117525	F3	Y	Y	-	-	-	-	-
ENSG00000160867	FGFR4	Y	Y	-	-	-	-	-
ENSG00000138363	ATIC	Y	-	-	-	-	-	-
ENSG00000138413	IDH1	Y	-	-	-	-	-	-
ENSG00000010671	BTK	Y	-	Y	-	-	-	-
ENSG00000167552	TUBA1A	Y	-	-	-	-	-	-
ENSG00000113263	ITK	Y	-	-	-	-	-	-
ENSG00000103653	CSK	Y	-	Y	-	-	Y	-
ENSG00000127824	TUBA4A	Y	-	-	-	-	-	-
ENSG00000258947	TUBB3	Y	-	-	-	-	-	-
ENSG00000101336	HCK	Y	-	Y	-	-	-	-
ENSG00000147099	HDAC8	Y	-	Y	-	-	-	-
ENSG00000143799	PARP1	Y	-	-	-	-	Y	-
ENSG00000196482	ESRRG	Y	-	-	-	-	-	-
ENSG00000137869	CYP19A1	Y	-	-	-	-	-	-
ENSG00000173372	C1QA	Y	-	-	-	-	-	-
ENSG00000173369	C1QB	Y	-	-	-	-	-	-
ENSG00000159189	C1QC	Y	-	-	-	-	-	-
ENSG00000203747	FCGR3A	Y	Y	-	-	-	-	-
ENSG00000143226	FCGR2A	Y	Y	-	-	-	-	-
ENSG00000072694	FCGR2B	Y	-	-	-	-	-	-
ENSG00000147168	IL2RG	Y	Y	Y	-	-	-	-
ENSG00000077782	FGFR1	Y	-	-	-	Y	-	-
ENSG00000068078	FGFR3	Y	Y	-	-	-	-	-
ENSG00000162009	SSTR5	Y	-	-	-	-	-	-
ENSG00000105810	CDK6	Y	Y	Y	-	-	-	-
ENSG00000135446	CDK4	Y	Y	-	-	Y	-	-
ENSG00000008018	PSMB1	Y	-	-	-	-	-	-
ENSG00000100804	PSMB5	Y	-	-	-	-	-	-
ENSG00000126067	PSMB2	Y	-	-	Y	-	-	-
ENSG00000116478	HDAC1	Y	-	-	-	-	-	-
ENSG00000196591	HDAC2	Y	-	-	-	-	-	-
ENSG00000171720	HDAC3	Y	-	-	-	-	-	-
ENSG00000094631	HDAC6	Y	-	Y	-	-	-	-
ENSG00000198793	MTOR	Y	-	-	-	-	Y	-
ENSG00000096968	JAK2	Y	-	-	-	-	Y	-
ENSG00000077097	TOP2B	Y	-	-	-	-	-	-
ENSG00000158825	CDA	Y	-	-	-	-	-	-
ENSG00000171848	RRM2	Y	-	-	-	-	Y	-
ENSG00000196411	EPHB4	Y	-	-	-	-	-	-
ENSG00000156136	DCK	Y	-	-	-	-	-	-
ENSG00000177556	ATOX1	Y	-	-	-	-	-	-
ENSG00000159228	CBR1	Y	-	-	-	-	-	-
ENSG00000119630	PGF	Y	-	-	-	-	-	-
ENSG00000120156	TEK	Y	-	-	-	-	-	-
ENSG00000185386	MAPK11	Y	-	-	-	-	-	-
ENSG00000179776	CDH5	Y	-	-	-	-	-	-
ENSG00000162613	FUBP1	Y	-	-	-	-	-	-
ENSG00000095015	MAP3K1	Y	-	-	-	-	-	-
ENSG00000188389	PDCD1	Y	Y	-	-	-	Y	-
ENSG00000120217	CD274	Y	Y	-	-	-	Y	-
ENSG00000167286	CD3D	Y	Y	-	-	-	-	-
ENSG00000186868	MAPT	Y	-	-	-	-	-	-
ENSG00000047849	MAP4	Y	-	-	-	-	-	-
ENSG00000120949	TNFRSF8	Y	-	-	-	-	-	-
ENSG00000026751	SLAMF7	Y	Y	-	-	-	-	-
ENSG00000105639	JAK3	Y	Y	-	-	-	-	-
ENSG00000177455	CD19	Y	-	-	-	-	-	-
ENSG00000120659	TNFSF11	Y	-	-	-	-	-	-
ENSG00000101916	TLR8	Y	-	Y	-	-	-	-
ENSG00000068024	HDAC4	Y	-	-	-	-	-	-
ENSG00000180616	SSTR2	Y	Y	-	-	-	-	-
ENSG00000152904	GGPS1	Y	-	-	-	-	-	-
ENSG00000010322	NISCH	Y	-	-	-	-	-	-
ENSG00000196754	S100A2	Y	Y	-	-	-	-	-
ENSG00000148053	NTRK2	Y	Y	-	-	-	-	-
ENSG00000048392	RRM2B	Y	-	Y	-	-	-	-
ENSG00000177084	POLE	Y	-	-	-	-	-	-
ENSG00000100479	POLE2	Y	-	-	-	-	-	-
ENSG00000115350	POLE4	Y	-	-	-	-	-	-
ENSG00000148229	POLE3	Y	-	-	-	-	-	-
ENSG00000108423	TUBD1	Y	-	-	-	-	-	-
ENSG00000074935	TUBE1	Y	-	-	-	-	-	-
ENSG00000131462	TUBG1	Y	-	-	-	-	-	-
ENSG00000106546	AHR	Y	-	-	-	-	-	-
ENSG00000109971	HSPA8	Y	-	-	-	-	-	-
ENSG00000107643	MAPK8	Y	-	-	-	-	-	-
ENSG00000129484	PARP2	Y	-	-	-	-	-	-
ENSG00000100316	RPL3	Y	-	-	Y	-	-	-
ENSG00000015592	STMN4	Y	-	-	-	-	-	-
ENSG00000041880	PARP3	Y	-	-	-	-	-	-
ENSG00000133703	KRAS	Y	-	-	-	-	-	Y
ENSG00000162434	JAK1	Y	-	-	-	-	-	-
ENSG00000105397	TYK2	Y	-	-	Y	-	-	-
ENSG00000167658	EEF2	Y	-	-	-	-	Y	-
ENSG00000254087	LYN	Y	Y	-	-	-	-	-
ENSG00000148660	CAMK2G	Y	-	-	-	-	-	-
ENSG00000088826	SMOX	Y	-	-	-	-	-	-
ENSG00000111252	SH2B3	Y	-	-	-	-	-	-
ENSG00000101213	PTK6	Y	-	-	-	-	-	-
ENSG00000173511	VEGFB	Y	-	-	-	-	-	-
ENSG00000240065	PSMB9	Y	Y	Y	-	-	-	-
ENSG00000205220	PSMB10	Y	-	-	-	-	-	-
ENSG00000204264	PSMB8	Y	-	Y	-	-	-	-
ENSG00000162733	DDR2	Y	Y	-	-	-	-	-
ENSG00000111816	FRK	Y	-	-	-	-	-	-
ENSG00000186716	BCR	Y	-	-	-	-	-	-
ENSG00000126934	MAP2K2	Y	-	-	-	-	Y	-
ENSG00000169967	MAP3K2	Y	-	-	-	-	-	-
ENSG00000113851	CRBN	Y	-	-	-	-	-	-
ENSG00000142178	SIK1	Y	-	-	-	-	-	-
ENSG00000114670	NEK11	Y	-	-	-	-	-	-
ENSG00000106683	LIMK1	Y	-	-	-	-	-	-
ENSG00000178568	ERBB4	Y	-	-	-	-	-	-
ENSG00000022355	GABRA1	Y	-	-	-	-	-	-
ENSG00000151834	GABRA2	Y	-	-	-	-	-	-
ENSG00000011677	GABRA3	Y	-	Y	-	-	-	-
ENSG00000109158	GABRA4	Y	-	-	-	-	-	-
ENSG00000186297	GABRA5	Y	-	-	-	-	-	-
ENSG00000145863	GABRA6	Y	-	-	-	-	-	-
ENSG00000163288	GABRB1	Y	-	-	-	-	-	-
ENSG00000145864	GABRB2	Y	-	-	-	-	-	-
ENSG00000166206	GABRB3	Y	-	-	-	-	-	-
ENSG00000187730	GABRD	Y	Y	-	-	-	-	-
ENSG00000102287	GABRE	Y	Y	Y	-	-	-	-
ENSG00000163285	GABRG1	Y	-	-	-	-	-	-
ENSG00000113327	GABRG2	Y	-	-	-	-	-	-
ENSG00000182256	GABRG3	Y	-	-	-	-	-	-
ENSG00000094755	GABRP	Y	Y	-	-	-	-	-
ENSG00000268089	GABRQ	Y	-	Y	-	-	-	-
ENSG00000179546	HTR1D	Y	-	-	-	-	-	-
ENSG00000168830	HTR1E	Y	-	-	-	-	-	-
ENSG00000179097	HTR1F	Y	-	-	-	-	-	-
ENSG00000102468	HTR2A	Y	-	-	-	-	-	-
ENSG00000135914	HTR2B	Y	Y	-	-	-	-	-
ENSG00000147246	HTR2C	Y	-	-	-	-	-	-
ENSG00000166736	HTR3A	Y	-	-	-	-	-	-
ENSG00000149305	HTR3B	Y	-	-	-	-	-	-
ENSG00000178084	HTR3C	Y	-	-	-	-	-	-
ENSG00000186090	HTR3D	Y	-	-	-	-	-	-
ENSG00000186038	HTR3E	Y	-	-	-	-	-	-
ENSG00000164270	HTR4	Y	-	-	-	-	-	-
ENSG00000158748	HTR6	Y	-	Y	-	-	-	-
ENSG00000148680	HTR7	Y	-	-	-	-	-	-
ENSG00000229314	ORM1	Y	Y	-	-	-	-	-
ENSG00000228278	ORM2	Y	Y	-	-	-	-	-
ENSG00000166501	PRKCB	Y	Y	-	-	-	-	-
ENSG00000163932	PRKCD	Y	-	-	-	-	-	-
ENSG00000171132	PRKCE	Y	-	-	-	-	-	-
ENSG00000126583	PRKCG	Y	-	-	-	-	-	-
ENSG00000163558	PRKCI	Y	-	-	-	-	-	-
ENSG00000065675	PRKCQ	Y	-	-	-	-	-	-
ENSG00000067606	PRKCZ	Y	-	-	-	-	-	-
ENSG00000189221	MAOA	Y	-	Y	-	-	-	-
ENSG00000069535	MAOB	Y	-	Y	-	-	-	-
ENSG00000106348	IMPDH1	Y	-	-	-	-	-	-
ENSG00000178035	IMPDH2	Y	-	-	-	Y	-	-
ENSG00000004468	CD38	Y	Y	-	-	-	Y	-
ENSG00000000938	FGR	Y	-	-	-	-	-	-
ENSG00000145242	EPHA5	Y	-	Y	-	-	-	-
ENSG00000091436	pk	Y	-	-	-	-	-	-
ENSG00000140464	PML	Y	-	-	Y	-	-	-
ENSG00000249915	PDCD6	Y	-	-	Y	-	-	-
ENSG00000111341	MGP	Y	Y	-	-	-	-	-
ENSG00000165194	PCDH19	Y	-	Y	-	-	-	-
ENSG00000166197	NOLC1	Y	-	-	-	-	-	-
ENSG00000100429	HDAC10	Y	-	-	-	-	-	-
ENSG00000163517	HDAC11	Y	-	-	-	-	-	-
ENSG00000108840	HDAC5	Y	-	-	-	-	-	-
ENSG00000061273	HDAC7	Y	-	-	-	-	-	-
ENSG00000048052	HDAC9	Y	-	-	-	-	-	-
ENSG00000103152	MPG	Y	-	-	-	-	-	-
ENSG00000143546	S100A8	Y	Y	-	-	-	-	-
ENSG00000160182	TFF1	Y	Y	-	-	-	-	-
ENSG00000170542	SERPINB9	Y	-	-	-	-	-	-
ENSG00000163220	S100A9	Y	Y	-	-	-	-	-
ENSG00000119508	NR4A3	Y	Y	-	-	-	-	-
ENSG00000125378	BMP4	Y	-	-	-	-	-	-
ENSG00000124762	CDKN1A	Y	-	-	-	-	-	-
ENSG00000135605	TEC	Y	-	-	-	-	-	-
ENSG00000074966	TXK	Y	-	-	-	-	-	-
ENSG00000167601	AXL	Y	-	-	-	-	Y	-
ENSG00000136573	BLK	Y	-	-	-	-	-	-
ENSG00000102010	BMX	Y	-	-	-	-	-	-
ENSG00000140538	NTRK3	Y	-	Y	-	-	-	-
ENSG00000047936	ROS1	Y	-	-	-	-	-	-
ENSG00000106462	EZH2	Y	-	-	-	-	Y	-
ENSG00000213465	ARL2	Y	-	-	-	-	-	-
ENSG00000116016	EPAS1	Y	-	-	-	-	-	-
ENSG00000007312	CD79B	Y	Y	-	-	-	-	-
ENSG00000082898	XPO1	Y	-	-	-	-	-	-
ENSG00000113300	CNOT6	Y	-	-	-	-	-	-
ENSG00000143217	PVRL4	Y	Y	-	-	-	-	-
ENSG00000119772	DNMT3A	Y	-	-	-	-	-	-
ENSG00000065361	ERBB3	Y	Y	-	-	-	Y	-
ENSG00000184292	TACSTD2	Y	Y	-	-	-	-	-
ENSG00000088305	DNMT3B	Y	-	-	-	-	-	-
ENSG00000048462	TNFRSF17	Y	Y	-	-	-	-	-
ENSG00000171209	CSN3	-	Y	-	-	-	-	-
ENSG00000204019	CT83	-	Y	-	-	-	-	-
ENSG00000184956	MUC6	-	Y	-	-	-	-	-
ENSG00000148346	LCN2	-	Y	-	-	-	-	-
ENSG00000129824	RPS4Y1	-	Y	Y	-	-	-	-
ENSG00000167656	LY6D	-	Y	-	-	-	-	-
ENSG00000137975	CLCA2	-	Y	-	-	-	-	-
ENSG00000166535	A2ML1	-	Y	-	-	-	-	-
ENSG00000166825	ANPEP	-	Y	-	-	-	-	-
ENSG00000130294	KIF1A	-	Y	Y	-	-	-	-
ENSG00000166426	CRABP1	-	Y	-	-	-	-	-
ENSG00000181617	FDCSP	-	Y	-	-	-	-	-
ENSG00000119866	BCL11A	-	Y	Y	-	-	-	-
ENSG00000164434	FABP7	-	Y	-	-	-	-	-
ENSG00000089199	CHGB	-	Y	-	-	-	-	-
ENSG00000130707	ASS1	-	Y	-	-	-	-	-
ENSG00000198650	TAT	-	Y	-	-	-	-	-
ENSG00000188505	NCCRP1	-	Y	-	-	-	-	-
ENSG00000102243	VGLL1	-	Y	-	-	-	-	-
ENSG00000256618	MTRNR2L1	-	Y	-	-	-	-	-
ENSG00000132465	IGJ	-	Y	-	-	-	-	-
ENSG00000186832	KRT16	-	Y	-	-	-	-	-
ENSG00000243955	GSTA1	-	Y	-	-	-	-	-
ENSG00000205426	KRT81	-	Y	-	-	-	-	-
ENSG00000143556	S100A7	-	Y	-	-	-	-	-
ENSG00000160886	LY6K	-	Y	-	-	-	-	-
ENSG00000151929	BAG3	-	Y	-	-	-	-	-
ENSG00000114547	ROPN1B	-	Y	-	-	-	-	-
ENSG00000178372	CALML5	-	Y	-	-	-	-	-
ENSG00000178363	CALML3	-	Y	-	-	-	-	-
ENSG00000130234	ACE2	-	Y	-	-	-	-	-
ENSG00000149043	SYT8	-	Y	-	-	-	-	-
ENSG00000157765	SLC34A2	-	Y	-	-	-	-	-
ENSG00000100604	CHGA	-	Y	-	-	-	-	-
ENSG00000206075	SERPINB5	-	Y	-	-	-	-	-
ENSG00000198910	L1CAM	-	Y	-	-	-	Y	Y
ENSG00000184937	WT1	-	Y	Y	-	-	-	-
ENSG00000167755	KLK6	-	Y	-	-	-	-	-
ENSG00000156219	ART3	-	Y	-	-	-	-	-
ENSG00000131668	BARX1	-	Y	-	-	-	-	-
ENSG00000256870	SLC5A8	-	Y	Y	-	-	-	-
ENSG00000268104	SLC6A14	-	Y	Y	-	-	-	-
ENSG00000162670	BRINP3	-	Y	-	-	-	-	-
ENSG00000135413	LACRT	-	Y	-	-	-	-	-
ENSG00000102837	OLFM4	-	Y	-	-	-	-	-
ENSG00000129451	KLK10	-	Y	Y	-	-	-	-
ENSG00000124102	PI3	-	Y	-	-	-	-	-
ENSG00000095713	CRTAC1	-	Y	Y	-	-	-	-
ENSG00000102854	MSLN	-	Y	-	-	-	-	-
ENSG00000172551	MUCL1	-	Y	-	-	-	-	-
ENSG00000012223	LTF	-	Y	-	-	-	-	-
ENSG00000133067	LGR6	-	Y	-	-	-	-	-
ENSG00000129988	LBP	-	Y	-	-	-	-	-
ENSG00000117983	MUC5B	-	Y	-	-	-	-	-
ENSG00000198729	PPP1R14C	-	Y	Y	-	-	-	-
ENSG00000198732	SMOC1	-	Y	-	-	-	-	-
ENSG00000256229	ZNF486	-	Y	-	-	-	-	-
ENSG00000073849	ST6GAL1	-	Y	-	-	-	-	-
ENSG00000248485	PCP4L1	-	Y	-	-	-	-	-
ENSG00000205420	KRT6A	-	Y	-	-	-	-	-
ENSG00000204644	ZFP57	-	Y	-	-	-	-	-
ENSG00000107984	DKK1	-	Y	Y	-	-	-	-
ENSG00000261857	MIA	-	Y	-	-	-	-	-
ENSG00000077274	CAPN6	-	Y	Y	-	-	-	-
ENSG00000134760	DSG1	-	Y	-	-	-	-	-
ENSG00000186160	CYP4Z1	-	Y	-	-	-	-	-
ENSG00000117115	PADI2	-	Y	-	-	-	-	-
ENSG00000167757	KLK11	-	Y	-	-	-	-	-
ENSG00000153446	C16orf89	-	Y	-	-	-	-	-
ENSG00000185634	SHC4	-	Y	-	-	-	-	-
ENSG00000101189	MRGBP	-	Y	-	-	-	-	-
ENSG00000100170	SLC5A1	-	Y	-	-	-	-	-
ENSG00000169035	KLK7	-	Y	-	-	-	-	-
ENSG00000104332	SFRP1	-	Y	-	-	-	-	-
ENSG00000136463	TACO1	-	Y	-	-	-	-	-
ENSG00000141750	STAC2	-	Y	Y	-	-	-	-
ENSG00000189377	CXCL17	-	Y	-	-	-	-	-
ENSG00000134757	DSG3	-	Y	Y	-	-	-	-
ENSG00000143452	HORMAD1	-	Y	-	-	-	-	-
ENSG00000134339	SAA2	-	Y	-	-	-	-	-
ENSG00000163406	SLC15A2	-	Y	-	-	-	-	-
ENSG00000133195	SLC39A11	-	Y	-	-	-	-	-
ENSG00000169469	SPRR1B	-	Y	-	-	-	-	-
ENSG00000170477	KRT4	-	Y	-	-	-	-	-
ENSG00000137699	TRIM29	-	Y	-	-	-	-	-
ENSG00000107159	CA9	-	Y	-	-	-	Y	-
ENSG00000171102	OBP2B	-	Y	-	-	-	-	-
ENSG00000135374	ELF5	-	Y	-	-	-	-	-
ENSG00000161634	DCD	-	Y	-	-	-	-	-
ENSG00000188257	PLA2G2A	-	Y	-	-	-	-	-
ENSG00000122584	NXPH1	-	Y	-	-	-	-	-
ENSG00000132744	ACY3	-	Y	-	-	-	-	-
ENSG00000128422	KRT17	-	Y	-	-	-	-	-
ENSG00000198643	FAM3D	-	Y	-	-	-	-	-
ENSG00000096006	CRISP3	-	Y	-	-	-	-	-
ENSG00000161798	AQP5	-	Y	-	-	-	-	-
ENSG00000026559	KCNG1	-	Y	-	-	-	-	-
ENSG00000171201	SMR3B	-	Y	-	-	-	-	-
ENSG00000186081	KRT5	-	Y	-	-	-	-	-
ENSG00000197506	SLC28A3	-	Y	-	-	-	-	-
ENSG00000164825	DEFB1	-	Y	-	-	-	-	-
ENSG00000185479	KRT6B	-	Y	-	-	-	-	-
ENSG00000105668	UPK1A	-	Y	-	Y	-	-	-
ENSG00000171208	NETO2	-	Y	-	-	-	-	-
ENSG00000204542	C6orf15	-	Y	-	-	-	-	-
ENSG00000168539	CHRM1	-	Y	-	-	-	-	-
ENSG00000181610	MRPS23	-	Y	-	-	-	-	-
ENSG00000115596	WNT6	-	Y	-	-	-	-	-
ENSG00000078081	LAMP3	-	Y	Y	-	-	-	-
ENSG00000101311	FERMT1	-	Y	-	-	-	-	-
ENSG00000254709	IGLL5	-	Y	-	Y	Y	-	-
ENSG00000163739	CXCL1	-	Y	-	-	-	-	-
ENSG00000111344	RASAL1	-	Y	-	-	-	-	-
ENSG00000117322	CR2	-	Y	-	-	-	-	-
ENSG00000073282	TP63	-	Y	-	-	-	-	-
ENSG00000134762	DSC3	-	Y	-	-	-	-	-
ENSG00000106829	TLE4	-	Y	-	-	-	-	-
ENSG00000163631	ALB	-	Y	-	-	-	-	-
ENSG00000176597	B3GNT5	-	Y	Y	-	-	-	-
ENSG00000171199	PROL1	-	Y	-	-	-	-	-
ENSG00000147697	GSDMC	-	Y	-	-	-	-	-
ENSG00000188549	C15orf52	-	Y	-	-	-	-	-
ENSG00000109846	CRYAB	-	Y	-	-	-	-	-
ENSG00000137265	IRF4	-	Y	-	-	-	-	-
ENSG00000162896	PIGR	-	Y	-	-	-	-	-
ENSG00000196196	HRCT1	-	Y	-	-	-	-	-
ENSG00000110777	POU2AF1	-	Y	-	-	-	-	-
ENSG00000186847	KRT14	-	Y	-	-	-	-	-
ENSG00000087191	PSMC5	-	Y	-	-	-	-	-
ENSG00000170549	IRX1	-	Y	Y	-	-	-	-
ENSG00000085741	WNT11	-	Y	-	-	-	-	-
ENSG00000167614	TTYH1	-	Y	-	-	-	-	-
ENSG00000159184	HOXB13	-	Y	Y	-	-	-	-
ENSG00000167759	KLK13	-	Y	-	-	-	-	-
ENSG00000163661	PTX3	-	Y	Y	-	-	-	-
ENSG00000156689	GLYATL2	-	Y	-	-	-	-	-
ENSG00000134240	HMGCS2	-	Y	-	-	-	-	-
ENSG00000105929	ATP6V0A4	-	Y	-	-	-	-	-
ENSG00000007062	PROM1	-	Y	-	-	-	-	-
ENSG00000118849	RARRES1	-	Y	-	-	-	-	-
ENSG00000081041	CXCL2	-	Y	-	-	-	-	-
ENSG00000119147	C2orf40	-	Y	-	-	-	-	-
ENSG00000189050	RNFT1	-	Y	-	-	-	-	-
ENSG00000105141	CASP14	-	Y	-	-	-	-	-
ENSG00000139266	2024-03-09	-	Y	-	-	-	-	-
ENSG00000137440	FGFBP1	-	Y	-	-	-	-	-
ENSG00000141552	ANAPC11	-	Y	-	-	-	-	-
ENSG00000129151	BBOX1	-	Y	-	-	-	-	-
ENSG00000138640	FAM13A	-	Y	-	-	-	-	-
ENSG00000214078	CPNE1	-	Y	-	-	-	-	-
ENSG00000167754	KLK5	-	Y	-	-	-	-	-
ENSG00000140519	RHCG	-	Y	-	-	-	-	-
ENSG00000184454	NCMAP	-	Y	-	Y	-	-	-
ENSG00000121807	CCR2	-	Y	-	-	-	-	-
ENSG00000156076	WIF1	-	Y	Y	-	-	-	-
ENSG00000123838	C4BPA	-	Y	-	-	-	-	-
ENSG00000005513	SOX8	-	Y	Y	-	-	-	-
ENSG00000161055	SCGB3A1	-	Y	Y	-	-	-	-
ENSG00000107317	PTGDS	-	Y	-	-	-	-	-
ENSG00000165030	NFIL3	-	Y	-	-	-	-	-
ENSG00000133048	CHI3L1	-	Y	-	-	-	-	-
ENSG00000171564	FGB	-	Y	-	-	-	-	-
ENSG00000137673	MMP7	-	Y	-	-	-	-	-
ENSG00000171475	WIPF2	-	Y	-	-	-	-	-
ENSG00000144451	SPAG16	-	Y	-	-	-	-	-
ENSG00000175084	DES	-	Y	-	-	-	-	-
ENSG00000125971	DYNLRB1	-	Y	-	-	-	-	-
ENSG00000171551	ECEL1	-	Y	-	-	-	-	-
ENSG00000054598	FOXC1	-	Y	-	-	-	-	-
ENSG00000129437	KLK14	-	Y	-	-	-	-	-
ENSG00000182195	LDOC1	-	Y	Y	-	-	-	-
ENSG00000143382	ADAMTSL4	-	Y	-	-	-	-	-
ENSG00000138131	LOXL4	-	Y	-	-	-	-	-
ENSG00000164879	CA3	-	Y	-	-	-	-	-
ENSG00000100304	TTLL12	-	Y	-	-	-	-	-
ENSG00000135346	CGA	-	Y	-	-	-	-	-
ENSG00000115009	CCL20	-	Y	-	-	-	-	-
ENSG00000164626	KCNK5	-	Y	-	-	-	-	-
ENSG00000124107	SLPI	-	Y	-	-	-	-	-
ENSG00000205502	C2CD4B	-	Y	-	-	-	-	-
ENSG00000117215	PLA2G2D	-	Y	-	-	-	-	-
ENSG00000188508	KRTDAP	-	Y	-	-	-	-	-
ENSG00000175318	GRAMD2	-	Y	-	-	-	-	-
ENSG00000255071	SAA2-SAA4	-	Y	-	-	-	-	-
ENSG00000115290	GRB14	-	Y	-	-	-	-	-
ENSG00000269404	SPIB	-	Y	-	-	-	-	-
ENSG00000106927	AMBP	-	Y	-	-	-	-	-
ENSG00000139055	ERP27	-	Y	-	-	-	-	-
ENSG00000020633	RUNX3	-	Y	-	-	-	-	-
ENSG00000198576	ARC	-	Y	-	-	-	-	-
ENSG00000164761	TNFRSF11B	-	Y	-	-	-	-	-
ENSG00000121898	CPXM2	-	Y	-	-	-	-	-
ENSG00000084207	GSTP1	-	Y	Y	-	-	-	-
ENSG00000204710	SPDYC	-	Y	-	-	-	-	-
ENSG00000163064	EN1	-	Y	-	-	-	-	-
ENSG00000132514	CLEC10A	-	Y	-	-	-	-	-
ENSG00000069188	SDK2	-	Y	-	-	-	-	-
ENSG00000131153	GINS2	-	Y	-	-	-	-	-
ENSG00000177932	ZNF354C	-	Y	Y	-	-	-	-
ENSG00000227471	AKR1B15	-	Y	-	-	-	-	-
ENSG00000134827	TCN1	-	Y	-	-	-	-	-
ENSG00000122188	LAX1	-	Y	-	-	-	-	-
ENSG00000109062	SLC9A3R1	-	Y	-	-	-	-	-
ENSG00000189001	SBSN	-	Y	-	-	-	-	-
ENSG00000170442	KRT86	-	Y	-	-	-	-	-
ENSG00000073350	LLGL2	-	Y	-	-	-	-	-
ENSG00000165795	NDRG2	-	Y	-	-	-	-	-
ENSG00000056558	TRAF1	-	Y	-	-	-	-	-
ENSG00000145936	KCNMB1	-	Y	-	-	-	-	-
ENSG00000091490	SEL1L3	-	Y	-	-	-	-	-
ENSG00000162366	PDZK1IP1	-	Y	-	-	-	-	-
ENSG00000172201	ID4	-	Y	-	-	-	-	-
ENSG00000116711	PLA2G4A	-	Y	-	-	-	-	-
ENSG00000234284	ZNF879	-	Y	Y	-	-	-	-
ENSG00000145920	CPLX2	-	Y	-	-	-	-	-
ENSG00000143867	OSR1	-	Y	-	-	-	-	-
ENSG00000137752	CASP1	-	Y	-	-	-	-	-
ENSG00000139352	ASCL1	-	Y	-	-	-	-	-
ENSG00000123836	PFKFB2	-	Y	-	-	-	-	-
ENSG00000115165	CYTIP	-	Y	-	-	-	-	-
ENSG00000123560	PLP1	-	Y	Y	-	-	-	-
ENSG00000241106	HLA-DOB	-	Y	-	-	-	-	-
ENSG00000169900	PYDC1	-	Y	-	-	-	-	-
ENSG00000257017	HP	-	Y	-	-	-	-	-
ENSG00000123609	NMI	-	Y	Y	-	-	-	-
ENSG00000064886	CHI3L2	-	Y	-	-	-	-	-
ENSG00000109610	SOD3	-	Y	-	-	-	-	-
ENSG00000113389	NPR3	-	Y	-	-	-	-	-
ENSG00000173432	SAA1	-	Y	-	-	-	-	-
ENSG00000111801	BTN3A3	-	Y	-	-	-	-	-
ENSG00000189120	SP6	-	Y	-	-	-	-	-
ENSG00000168309	FAM107A	-	Y	-	-	-	-	-
ENSG00000151640	DPYSL4	-	Y	Y	-	-	-	-
ENSG00000182175	RGMA	-	Y	-	-	-	-	-
ENSG00000171243	SOSTDC1	-	Y	-	-	-	-	-
ENSG00000197872	FAM49A	-	Y	-	-	-	-	-
ENSG00000131771	PPP1R1B	-	Y	-	-	-	-	-
ENSG00000152284	TCF7L1	-	Y	-	-	-	-	-
ENSG00000277258	PCGF2	-	Y	-	-	-	-	-
ENSG00000078898	BPIFB2	-	Y	-	-	-	-	-
ENSG00000169429	CXCL8	-	Y	-	-	-	-	-
ENSG00000133636	NTS	-	Y	-	-	-	-	-
ENSG00000163017	ACTG2	-	Y	-	-	-	-	-
ENSG00000172575	RASGRP1	-	Y	-	-	-	-	-
ENSG00000198846	TOX	-	Y	-	-	-	-	-
ENSG00000144476	ACKR3	-	Y	-	-	-	-	-
ENSG00000105369	CD79A	-	Y	-	-	-	-	-
ENSG00000143013	LMO4	-	Y	-	-	-	-	-
ENSG00000108551	RASD1	-	Y	-	-	-	-	-
ENSG00000111912	NCOA7	-	Y	-	-	-	-	-
ENSG00000172005	MAL	-	Y	-	-	-	-	-
ENSG00000133401	PDZD2	-	Y	-	-	-	-	-
ENSG00000125534	PPDPF	-	Y	-	-	-	-	-
ENSG00000007216	SLC13A2	-	Y	-	-	-	-	-
ENSG00000068097	HEATR6	-	Y	-	-	-	-	-
ENSG00000110195	FOLR1	-	Y	-	-	-	-	-
ENSG00000140511	HAPLN3	-	Y	-	-	-	-	-
ENSG00000101871	MID1	-	Y	Y	-	-	-	-
ENSG00000171303	KCNK3	-	Y	-	-	-	-	-
ENSG00000182240	BACE2	-	Y	-	-	-	-	-
ENSG00000102878	HSF4	-	Y	-	-	-	-	-
ENSG00000123095	BHLHE41	-	Y	-	-	-	-	-
ENSG00000133661	SFTPD	-	Y	-	-	-	-	-
ENSG00000147689	FAM83A	-	Y	-	-	-	-	-
ENSG00000124939	SCGB2A1	-	Y	-	-	-	-	-
ENSG00000166750	SLFN5	-	Y	-	-	-	-	-
ENSG00000034971	MYOC	-	Y	-	-	-	-	-
ENSG00000157368	IL34	-	Y	-	-	-	-	-
ENSG00000161653	NAGS	-	Y	Y	-	-	-	-
ENSG00000103044	HAS3	-	Y	-	-	-	-	-
ENSG00000169683	LRRC45	-	Y	-	-	-	-	-
ENSG00000183048	SLC25A10	-	Y	-	-	-	-	-
ENSG00000143632	ACTA1	-	Y	-	-	-	-	-
ENSG00000120162	MOB3B	-	Y	-	-	-	-	-
ENSG00000101210	EEF1A2	-	Y	-	-	-	-	-
ENSG00000204936	CD177	-	Y	-	-	-	-	-
ENSG00000078589	P2RY10	-	Y	Y	-	-	-	-
ENSG00000121552	CSTA	-	Y	-	-	-	-	-
ENSG00000124935	SCGB1D2	-	Y	-	-	-	-	-
ENSG00000065618	COL17A1	-	Y	-	-	-	-	-
ENSG00000109205	ODAM	-	Y	-	-	-	-	-
ENSG00000100373	UPK3A	-	Y	-	-	-	-	-
ENSG00000224877	C17orf89	-	Y	-	-	-	-	-
ENSG00000126878	AIF1L	-	Y	-	-	-	-	-
ENSG00000129455	KLK8	-	Y	-	-	-	-	-
ENSG00000094963	FMO2	-	Y	-	-	-	-	-
ENSG00000163209	SPRR3	-	Y	-	-	-	-	-
ENSG00000136999	NOV	-	Y	-	-	-	-	-
ENSG00000081377	CDC14B	-	Y	Y	-	-	-	-
ENSG00000159167	STC1	-	Y	-	-	-	-	-
ENSG00000164691	TAGAP	-	Y	Y	-	-	-	-
ENSG00000144857	BOC	-	Y	-	-	-	-	-
ENSG00000172215	CXCR6	-	Y	-	-	-	-	-
ENSG00000170476	MZB1	-	Y	-	-	-	-	-
ENSG00000069812	HES2	-	Y	-	-	-	-	-
ENSG00000124406	ATP8A1	-	Y	-	-	-	-	-
ENSG00000131759	RARA	-	Y	-	-	-	-	-
ENSG00000115844	DLX2	-	Y	-	-	-	-	-
ENSG00000188910	GJB3	-	Y	-	-	-	-	-
ENSG00000126353	CCR7	-	Y	-	-	-	-	-
ENSG00000197635	DPP4	-	Y	-	-	-	-	-
ENSG00000103254	FAM173A	-	Y	-	-	-	-	-
ENSG00000171033	PKIA	-	Y	-	-	-	-	-
ENSG00000174697	LEP	-	Y	-	-	-	-	-
ENSG00000181374	CCL13	-	Y	-	-	-	-	-
ENSG00000104783	KCNN4	-	Y	Y	-	-	-	-
ENSG00000121316	PLBD1	-	Y	-	-	-	-	-
ENSG00000135069	PSAT1	-	Y	-	-	-	-	-
ENSG00000204335	SP5	-	Y	-	-	-	-	-
ENSG00000205710	C17orf107	-	Y	-	-	-	-	-
ENSG00000125730	C3	-	Y	-	Y	-	-	Y
ENSG00000260314	MRC1	-	Y	-	-	-	-	-
ENSG00000204175	GPRIN2	-	Y	-	-	-	-	-
ENSG00000062038	CDH3	-	Y	-	-	-	-	-
ENSG00000054938	CHRDL2	-	Y	-	-	-	-	-
ENSG00000135226	UGT2B28	-	Y	-	-	-	-	-
ENSG00000203685	C1orf95	-	Y	-	-	-	-	-
ENSG00000118898	PPL	-	Y	-	-	-	-	-
ENSG00000163710	PCOLCE2	-	Y	-	-	-	-	-
ENSG00000003096	KLHL13	-	Y	Y	-	-	-	-
ENSG00000158481	CD1C	-	Y	-	-	-	-	-
ENSG00000163568	AIM2	-	Y	-	-	-	-	-
ENSG00000130487	KLHDC7B	-	Y	-	-	-	-	-
ENSG00000125430	HS3ST3B1	-	Y	-	-	-	-	-
ENSG00000171222	SCAND1	-	Y	-	-	-	-	-
ENSG00000137285	TUBB2B	-	Y	-	-	-	-	-
ENSG00000107968	MAP3K8	-	Y	-	-	-	-	-
ENSG00000092621	PHGDH	-	Y	-	-	-	Y	-
ENSG00000112936	C7	-	Y	-	-	-	-	-
ENSG00000132561	MATN2	-	Y	-	-	-	-	-
ENSG00000176692	FOXC2	-	Y	Y	-	-	-	-
ENSG00000128510	CPA4	-	Y	-	-	-	-	-
ENSG00000111199	TRPV4	-	Y	-	-	-	-	-
ENSG00000115758	ODC1	-	Y	-	-	-	-	-
ENSG00000070193	FGF10	-	Y	-	-	-	-	-
ENSG00000100767	PAPLN	-	Y	-	-	-	-	-
ENSG00000141378	PTRH2	-	Y	-	-	-	-	-
ENSG00000198074	AKR1B10	-	Y	-	-	-	-	-
ENSG00000185905	C16orf54	-	Y	-	-	-	-	-
ENSG00000115963	RND3	-	Y	-	-	-	-	-
ENSG00000088726	TMEM40	-	Y	-	-	-	-	-
ENSG00000205221	VIT	-	Y	-	-	-	-	-
ENSG00000172137	CALB2	-	Y	-	-	-	-	-
ENSG00000023445	BIRC3	-	Y	-	Y	-	Y	-
ENSG00000102445	KIAA0226L	-	Y	-	-	-	-	-
ENSG00000144648	ACKR2	-	Y	-	-	-	-	-
ENSG00000171488	LRRC8C	-	Y	-	-	-	-	-
ENSG00000102048	ASB9	-	Y	Y	-	-	-	-
ENSG00000076554	TPD52	-	Y	-	-	-	-	-
ENSG00000176887	SOX11	-	Y	-	-	-	-	-
ENSG00000182253	SYNM	-	Y	-	-	-	-	-
ENSG00000204248	COL11A2	-	Y	-	-	-	-	-
ENSG00000197142	ACSL5	-	Y	-	-	-	-	-
ENSG00000122176	FMOD	-	Y	-	-	-	-	-
ENSG00000127328	RAB3IP	-	Y	-	-	-	-	-
ENSG00000019169	MARCO	-	Y	-	-	-	-	-
ENSG00000132639	SNAP25	-	Y	-	-	-	-	-
ENSG00000168685	IL7R	-	Y	-	-	-	-	Y
ENSG00000100368	CSF2RB	-	Y	-	-	-	-	-
ENSG00000116031	CD207	-	Y	-	-	-	-	-
ENSG00000152256	PDK1	-	Y	-	-	-	-	-
ENSG00000136158	SPRY2	-	Y	-	-	-	-	-
ENSG00000110484	SCGB2A2	-	Y	-	-	-	-	-
ENSG00000126545	CSN1S1	-	Y	-	-	-	-	-
ENSG00000188783	PRELP	-	Y	-	-	-	-	-
ENSG00000160111	CPAMD8	-	Y	-	-	-	-	-
ENSG00000131844	MCCC2	-	Y	-	-	-	-	-
ENSG00000127324	TSPAN8	-	Y	-	-	-	-	-
ENSG00000006747	SCIN	-	Y	-	-	-	-	-
ENSG00000061656	SPAG4	-	Y	-	-	-	-	-
ENSG00000171557	FGG	-	Y	-	-	-	-	-
ENSG00000177283	FZD8	-	Y	-	-	-	-	-
ENSG00000198300	PEG3	-	Y	Y	-	-	-	Y
ENSG00000079689	SCGN	-	Y	-	-	-	-	-
ENSG00000204237	OXLD1	-	Y	-	-	-	-	-
ENSG00000179241	LDLRAD3	-	Y	-	-	-	-	-
ENSG00000176153	GPX2	-	Y	-	-	-	-	-
ENSG00000127588	GNG13	-	Y	-	-	-	-	-
ENSG00000169689	STRA13	-	Y	-	-	-	-	-
ENSG00000099260	PALMD	-	Y	-	-	-	-	-
ENSG00000180644	PRF1	-	Y	-	-	-	-	-
ENSG00000181649	PHLDA2	-	Y	-	-	-	-	-
ENSG00000167191	GPRC5B	-	Y	-	-	-	-	-
ENSG00000161513	FDXR	-	Y	-	-	-	-	-
ENSG00000134242	PTPN22	-	Y	-	-	-	-	Y
ENSG00000118308	LRMP	-	Y	-	-	-	-	-
ENSG00000104998	IL27RA	-	Y	-	-	-	-	-
ENSG00000108349	CASC3	-	Y	-	-	-	-	-
ENSG00000165996	PTPLA	-	Y	-	-	-	-	-
ENSG00000158258	CLSTN2	-	Y	-	-	-	-	-
ENSG00000183844	FAM3B	-	Y	-	-	-	-	-
ENSG00000172716	SLFN11	-	Y	Y	-	-	-	-
ENSG00000169750	RAC3	-	Y	-	-	-	-	-
ENSG00000184384	MAML2	-	Y	-	-	-	-	-
ENSG00000198183	BPIFA1	-	Y	-	-	-	-	-
ENSG00000167531	LALBA	-	Y	-	-	-	-	-
ENSG00000099284	H2AFY2	-	Y	-	-	-	-	-
ENSG00000165655	ZNF503	-	Y	-	-	-	-	-
ENSG00000101938	CHRDL1	-	Y	Y	-	-	-	-
ENSG00000081059	TCF7	-	Y	-	-	-	-	-
ENSG00000187689	AMTN	-	Y	-	-	-	-	-
ENSG00000102683	SGCG	-	Y	-	-	-	-	-
ENSG00000159200	RCAN1	-	Y	-	-	-	-	-
ENSG00000186493	C5orf38	-	Y	Y	-	-	-	-
ENSG00000184697	CLDN6	-	Y	-	-	-	-	-
ENSG00000166592	RRAD	-	Y	-	-	-	-	-
ENSG00000008196	TFAP2B	-	Y	-	-	-	-	-
ENSG00000180596	HIST1H2BC	-	Y	-	-	-	-	-
ENSG00000196091	MYBPC1	-	Y	-	-	-	-	-
ENSG00000147852	VLDLR	-	Y	-	-	-	-	-
ENSG00000188338	SLC38A3	-	Y	-	-	-	-	-
ENSG00000163171	CDC42EP3	-	Y	-	-	-	-	-
ENSG00000173641	HSPB7	-	Y	-	-	-	-	-
ENSG00000171608	PIK3CD	-	Y	-	-	-	-	-
ENSG00000121440	PDZRN3	-	Y	-	-	-	-	-
ENSG00000183813	CCR4	-	Y	-	-	-	-	-
ENSG00000183943	PRKX	-	Y	Y	-	-	-	-
ENSG00000124143	ARHGAP40	-	Y	Y	-	-	-	-
ENSG00000128268	MGAT3	-	Y	-	-	-	-	-
ENSG00000189058	APOD	-	Y	Y	-	-	-	-
ENSG00000173559	NABP1	-	Y	-	-	Y	-	-
ENSG00000081237	PTPRC	-	Y	-	-	-	-	Y
ENSG00000140968	IRF8	-	Y	-	-	-	-	-
ENSG00000172159	FRMD3	-	Y	-	-	-	-	-
ENSG00000186951	PPARA	-	Y	-	Y	-	-	-
ENSG00000167702	KIFC2	-	Y	-	-	-	-	-
ENSG00000147180	ZNF711	-	Y	Y	-	-	-	Y
ENSG00000136960	ENPP2	-	Y	-	-	-	-	-
ENSG00000179583	CIITA	-	Y	-	Y	-	-	-
ENSG00000131203	IDO1	-	Y	-	-	-	-	-
ENSG00000184330	S100A7A	-	Y	-	-	-	-	-
ENSG00000107742	SPOCK2	-	Y	-	-	-	-	-
ENSG00000185811	IKZF1	-	Y	Y	-	-	-	-
ENSG00000170832	USP32	-	Y	Y	-	-	-	-
ENSG00000163053	SLC16A14	-	Y	-	-	-	-	-
ENSG00000103024	NME3	-	Y	-	-	-	-	-
ENSG00000198879	SFMBT2	-	Y	-	-	-	-	-
ENSG00000198624	CCDC69	-	Y	-	Y	-	-	-
ENSG00000164530	PI16	-	Y	-	-	-	-	-
ENSG00000197943	PLCG2	-	Y	-	-	-	-	-
ENSG00000007933	FMO3	-	Y	-	-	-	-	-
ENSG00000153162	BMP6	-	Y	Y	-	-	-	-
ENSG00000139193	CD27	-	Y	-	-	-	-	-
ENSG00000198848	CES1	-	Y	-	-	-	-	-
ENSG00000136514	RTP4	-	Y	-	-	-	-	-
ENSG00000186517	ARHGAP30	-	Y	-	-	-	-	-
ENSG00000160791	CCR5	-	Y	-	-	-	-	-
ENSG00000071967	CYBRD1	-	Y	-	-	-	-	-
ENSG00000077327	SPAG6	-	Y	-	-	-	-	-
ENSG00000147862	NFIB	-	Y	-	-	-	-	-
ENSG00000158488	CD1E	-	Y	-	-	-	-	-
ENSG00000109861	CTSC	-	Y	-	-	-	-	-
ENSG00000100362	PVALB	-	Y	-	-	-	-	-
ENSG00000140263	SORD	-	Y	-	-	-	-	-
ENSG00000167711	SERPINF2	-	Y	-	-	-	-	-
ENSG00000133315	MACROD1	-	Y	-	-	-	-	-
ENSG00000196781	TLE1	-	Y	-	-	-	-	-
ENSG00000107738	C10orf54	-	Y	-	-	-	-	-
ENSG00000171401	KRT13	-	Y	-	-	-	-	-
ENSG00000168916	ZNF608	-	Y	-	-	-	-	-
ENSG00000162551	ALPL	-	Y	-	-	-	-	-
ENSG00000166509	CLEC3A	-	Y	-	-	-	-	-
ENSG00000275385	CCL18	-	Y	-	-	-	-	-
ENSG00000171649	ZIK1	-	Y	-	-	-	-	-
ENSG00000156298	TSPAN7	-	Y	Y	-	-	-	-
ENSG00000144824	PHLDB2	-	Y	-	-	-	-	-
ENSG00000215440	NPEPL1	-	Y	-	-	-	-	-
ENSG00000115956	PLEK	-	Y	-	-	-	-	-
ENSG00000145860	RNF145	-	Y	-	-	-	-	-
ENSG00000100453	GZMB	-	Y	-	-	-	-	-
ENSG00000108932	SLC16A6	-	Y	-	-	-	-	-
ENSG00000168918	INPP5D	-	Y	-	-	-	-	-
ENSG00000074527	NTN4	-	Y	-	-	-	-	-
ENSG00000108878	CACNG1	-	Y	-	-	-	-	-
ENSG00000175592	FOSL1	-	Y	-	-	-	-	-
ENSG00000128342	LIF	-	Y	-	-	-	-	-
ENSG00000148468	FAM171A1	-	Y	-	-	-	-	-
ENSG00000196263	ZNF471	-	Y	Y	-	-	-	-
ENSG00000048740	CELF2	-	Y	-	-	-	-	-
ENSG00000155629	PIK3AP1	-	Y	-	-	-	-	-
ENSG00000158164	TMSB15A	-	Y	Y	-	-	-	-
ENSG00000169738	DCXR	-	Y	-	-	-	-	-
ENSG00000138678	AGPAT9	-	Y	-	-	-	-	-
ENSG00000179913	B3GNT3	-	Y	Y	-	-	-	-
ENSG00000171560	FGA	-	Y	-	-	-	-	-
ENSG00000149090	PAMR1	-	Y	-	-	-	-	-
ENSG00000125257	ABCC4	-	Y	-	-	-	-	-
ENSG00000109424	UCP1	-	Y	-	-	-	-	-
ENSG00000154451	GBP5	-	Y	-	-	-	-	-
ENSG00000167549	CORO6	-	Y	-	-	-	-	-
ENSG00000144354	CDCA7	-	Y	-	-	-	-	-
ENSG00000165078	CPA6	-	Y	-	-	-	-	-
ENSG00000204267	TAP2	-	Y	-	-	-	-	-
ENSG00000117228	GBP1	-	Y	-	-	-	-	-
ENSG00000164342	TLR3	-	Y	-	-	-	-	-
ENSG00000171522	PTGER4	-	Y	-	-	-	-	-
ENSG00000101134	DOK5	-	Y	-	-	-	-	-
ENSG00000135916	ITM2C	-	Y	-	-	-	-	-
ENSG00000158186	MRAS	-	Y	-	-	-	-	-
ENSG00000129167	TPH1	-	Y	-	-	-	-	-
ENSG00000100079	LGALS2	-	Y	-	-	-	-	-
ENSG00000167208	SNX20	-	Y	-	-	-	-	-
ENSG00000198771	RCSD1	-	Y	-	-	-	-	-
ENSG00000163701	IL17RE	-	Y	-	-	-	-	-
ENSG00000110448	CD5	-	Y	-	-	-	-	-
ENSG00000006210	CX3CL1	-	Y	-	-	-	-	-
ENSG00000160654	CD3G	-	Y	-	-	-	-	-
ENSG00000162739	SLAMF6	-	Y	-	-	-	-	-
ENSG00000138135	CH25H	-	Y	-	-	-	-	-
ENSG00000156234	CXCL13	-	Y	-	-	-	-	-
ENSG00000185640	KRT79	-	Y	-	-	-	-	-
ENSG00000064300	NGFR	-	Y	Y	-	-	-	-
ENSG00000013297	CLDN11	-	Y	-	-	-	-	-
ENSG00000183971	NPW	-	Y	-	-	-	-	-
ENSG00000132274	TRIM22	-	Y	-	-	-	-	-
ENSG00000205364	MT1M	-	Y	-	-	-	-	-
ENSG00000132530	XAF1	-	Y	-	-	-	-	-
ENSG00000162645	GBP2	-	Y	-	-	-	-	-
ENSG00000165168	CYBB	-	Y	-	-	-	-	-
ENSG00000168743	NPNT	-	Y	-	-	-	-	-
ENSG00000139970	RTN1	-	Y	-	-	-	-	Y
ENSG00000174607	UGT8	-	Y	-	-	-	-	-
ENSG00000101441	CST4	-	Y	-	-	-	-	-
ENSG00000118503	TNFAIP3	-	Y	-	-	-	-	-
ENSG00000070882	OSBPL3	-	Y	-	-	-	-	-
ENSG00000122862	SRGN	-	Y	-	-	-	-	-
ENSG00000141579	ZNF750	-	Y	-	-	-	-	-
ENSG00000187210	GCNT1	-	Y	-	-	-	-	-
ENSG00000148344	PTGES	-	Y	-	-	-	-	-
ENSG00000160050	CCDC28B	-	Y	-	-	-	-	-
ENSG00000127951	FGL2	-	Y	-	-	-	-	-
ENSG00000111913	FAM65B	-	Y	-	-	-	-	-
ENSG00000154175	ABI3BP	-	Y	-	-	-	-	-
ENSG00000128815	WDFY4	-	Y	-	-	-	-	-
ENSG00000110324	IL10RA	-	Y	-	-	-	-	-
ENSG00000197629	MPEG1	-	Y	-	-	-	-	-
ENSG00000189280	GJB5	-	Y	-	-	-	-	-
ENSG00000135447	PPP1R1A	-	Y	-	-	-	-	-
ENSG00000183036	PCP4	-	Y	-	-	-	-	-
ENSG00000138772	ANXA3	-	Y	-	-	-	-	-
ENSG00000170367	CST5	-	Y	-	-	-	-	-
ENSG00000165507	C10orf10	-	Y	-	-	-	-	-
ENSG00000240694	PNMA2	-	Y	-	-	-	-	-
ENSG00000102970	CCL17	-	Y	-	-	-	-	-
ENSG00000234745	HLA-B	-	Y	-	-	-	-	Y
ENSG00000160712	IL6R	-	Y	-	-	-	-	-
ENSG00000168461	RAB31	-	Y	-	-	-	-	-
ENSG00000188613	NANOS1	-	Y	-	-	-	-	-
ENSG00000121895	TMEM156	-	Y	-	-	-	-	-
ENSG00000198821	CD247	-	Y	-	-	-	-	-
ENSG00000134516	DOCK2	-	Y	-	-	-	-	-
ENSG00000131096	PYY	-	Y	-	-	-	-	-
ENSG00000158125	XDH	-	Y	-	-	-	-	-
ENSG00000054277	OPN3	-	Y	-	-	-	-	-
ENSG00000080200	CRYBG3	-	Y	-	-	-	-	-
ENSG00000179639	FCER1A	-	Y	-	-	-	-	-
ENSG00000183018	SPNS2	-	Y	-	-	-	-	-
ENSG00000169991	IFFO2	-	Y	-	-	-	-	-
ENSG00000156096	UGT2B4	-	Y	-	-	-	-	-
ENSG00000131015	ULBP2	-	Y	-	-	-	-	-
ENSG00000133135	RNF128	-	Y	Y	-	-	-	-
ENSG00000196730	DAPK1	-	Y	-	Y	-	-	-
ENSG00000119514	GALNT12	-	Y	Y	-	-	-	-
ENSG00000246705	H2AFJ	-	Y	-	-	-	-	-
ENSG00000122863	CHST3	-	Y	-	-	-	-	-
ENSG00000042980	ADAM28	-	Y	-	-	-	-	-
ENSG00000146757	ZNF92	-	Y	-	-	-	-	-
ENSG00000161929	SCIMP	-	Y	-	-	-	-	-
ENSG00000235568	NFAM1	-	Y	-	-	-	-	-
ENSG00000163032	VSNL1	-	Y	-	-	-	-	-
ENSG00000160593	AMICA1	-	Y	-	-	-	-	-
ENSG00000134323	MYCN	-	Y	Y	-	-	-	-
ENSG00000075461	CACNG4	-	Y	-	-	-	-	-
ENSG00000137857	DUOX1	-	Y	-	-	-	-	-
ENSG00000027869	SH2D2A	-	Y	-	-	-	-	-
ENSG00000078399	HOXA9	-	Y	Y	-	-	-	-
ENSG00000168269	FOXI1	-	Y	-	-	-	-	-
ENSG00000171951	SCG2	-	Y	-	-	-	-	-
ENSG00000131773	KHDRBS3	-	Y	-	-	-	-	-
ENSG00000175040	CHST2	-	Y	-	-	-	-	-
ENSG00000185559	DLK1	-	Y	-	-	-	-	-
ENSG00000170835	CEL	-	Y	-	-	-	-	-
ENSG00000157601	MX1	-	Y	-	Y	-	-	-
ENSG00000143185	XCL2	-	Y	-	-	-	-	-
ENSG00000187288	CIDEC	-	Y	-	-	-	-	-
ENSG00000115919	KYNU	-	Y	-	-	-	-	-
ENSG00000104321	TRPA1	-	Y	-	-	-	-	-
ENSG00000196878	LAMB3	-	Y	-	-	-	-	-
ENSG00000204642	HLA-F	-	Y	-	-	-	-	-
ENSG00000198944	SOWAHA	-	Y	-	-	-	-	-
ENSG00000182621	PLCB1	-	Y	-	-	-	-	-
ENSG00000144730	IL17RD	-	Y	-	-	-	-	-
ENSG00000134755	DSC2	-	Y	-	-	-	-	-
ENSG00000276043	UHRF1	-	Y	-	-	-	-	-
ENSG00000117594	HSD11B1	-	Y	-	-	-	-	-
ENSG00000100095	SEZ6L	-	Y	-	-	-	-	-
ENSG00000012660	ELOVL5	-	Y	-	-	-	-	-
ENSG00000007908	SELE	-	Y	-	-	-	-	-
ENSG00000105851	PIK3CG	-	Y	-	-	-	-	Y
ENSG00000148948	LRRC4C	-	Y	-	-	-	-	-
ENSG00000135222	CSN2	-	Y	-	-	-	-	-
ENSG00000108352	RAPGEFL1	-	Y	-	-	-	-	-
ENSG00000090376	IRAK3	-	Y	-	-	-	-	-
ENSG00000172243	CLEC7A	-	Y	-	-	-	-	-
ENSG00000185101	ANO9	-	Y	-	-	-	-	-
ENSG00000125910	S1PR4	-	Y	-	-	-	-	-
ENSG00000163823	CCR1	-	Y	-	-	-	-	-
ENSG00000108700	CCL8	-	Y	-	-	-	-	-
ENSG00000162654	GBP4	-	Y	-	-	-	-	-
ENSG00000168394	TAP1	-	Y	-	-	-	-	-
ENSG00000109654	TRIM2	-	Y	Y	-	-	-	-
ENSG00000169562	GJB1	-	Y	Y	-	-	-	-
ENSG00000013583	HEBP1	-	Y	-	-	-	-	-
ENSG00000102554	KLF5	-	Y	-	-	-	-	-
ENSG00000263961	C1orf186	-	Y	-	-	-	-	-
ENSG00000134324	LPIN1	-	Y	-	-	-	-	-
ENSG00000136286	MYO1G	-	Y	-	-	-	-	-
ENSG00000123338	NCKAP1L	-	Y	-	-	-	-	-
ENSG00000095739	BAMBI	-	Y	-	-	-	-	-
ENSG00000162004	CCDC78	-	Y	-	-	-	-	-
ENSG00000182463	TSHZ2	-	Y	-	-	-	-	-
ENSG00000101445	PPP1R16B	-	Y	-	-	-	-	-
ENSG00000137078	SIT1	-	Y	-	-	-	-	-
ENSG00000196549	MME	-	Y	-	-	-	-	-
ENSG00000206503	HLA-A	-	Y	-	-	-	-	-
ENSG00000257108	NHLRC4	-	Y	-	-	-	-	-
ENSG00000151882	CCL28	-	Y	-	-	-	-	-
ENSG00000112773	FAM46A	-	Y	-	-	-	-	-
ENSG00000137441	FGFBP2	-	Y	-	-	-	-	-
ENSG00000101230	ISM1	-	Y	-	-	-	-	-
ENSG00000186474	KLK12	-	Y	-	-	-	-	-
ENSG00000137033	IL33	-	Y	-	-	-	-	-
ENSG00000128218	VPREB3	-	Y	-	-	-	-	-
ENSG00000121039	RDH10	-	Y	-	-	-	-	-
ENSG00000165272	AQP3	-	Y	-	-	-	-	-
ENSG00000094804	CDC6	-	Y	-	-	-	-	-
ENSG00000028277	POU2F2	-	Y	-	-	-	-	-
ENSG00000165072	MAMDC2	-	Y	-	-	-	-	-
ENSG00000197646	PDCD1LG2	-	Y	-	-	-	-	-
ENSG00000154277	UCHL1	-	Y	Y	-	-	-	-
ENSG00000111796	KLRB1	-	Y	-	-	-	-	-
ENSG00000158055	GRHL3	-	Y	-	-	-	-	-
ENSG00000163347	CLDN1	-	Y	-	-	-	-	-
ENSG00000221890	NPTXR	-	Y	-	-	-	-	-
ENSG00000169248	CXCL11	-	Y	-	-	-	-	-
ENSG00000175928	LRRN1	-	Y	-	-	-	-	-
ENSG00000204632	HLA-G	-	Y	-	-	-	-	-
ENSG00000175426	PCSK1	-	Y	-	-	-	-	-
ENSG00000182118	FAM89A	-	Y	-	-	-	-	-
ENSG00000138755	CXCL9	-	Y	-	-	-	-	-
ENSG00000140379	BCL2A1	-	Y	-	-	-	Y	-
ENSG00000108379	WNT3	-	Y	-	-	-	-	-
ENSG00000168497	SDPR	-	Y	-	-	-	-	-
ENSG00000133106	EPSTI1	-	Y	Y	-	-	-	-
ENSG00000117009	KMO	-	Y	-	-	-	-	-
ENSG00000123453	SARDH	-	Y	-	-	-	-	-
ENSG00000225556	C2CD4D	-	Y	-	-	-	-	-
ENSG00000009790	TRAF3IP3	-	Y	-	-	-	-	-
ENSG00000167771	RCOR2	-	Y	-	-	-	-	-
ENSG00000134061	CD180	-	Y	-	-	-	-	-
ENSG00000090530	P3H2	-	Y	-	-	-	-	-
ENSG00000152086	TUBA3E	-	Y	-	-	-	-	-
ENSG00000196407	THEM5	-	Y	-	-	-	-	-
ENSG00000104490	NCALD	-	Y	-	-	-	-	-
ENSG00000203782	LOR	-	Y	Y	-	-	-	-
ENSG00000155622	XAGE2B	-	Y	-	-	-	-	-
ENSG00000084628	NKAIN1	-	Y	-	-	-	-	-
ENSG00000137872	SEMA6D	-	Y	-	-	-	-	-
ENSG00000165092	ALDH1A1	-	Y	-	-	-	-	-
ENSG00000227507	LTB	-	Y	-	-	-	-	-
ENSG00000107551	RASSF4	-	Y	-	-	-	-	-
ENSG00000160191	PDE9A	-	Y	-	-	-	-	-
ENSG00000184160	ADRA2C	-	Y	-	-	-	-	-
ENSG00000103260	METRN	-	Y	-	-	-	-	-
ENSG00000149809	TM7SF2	-	Y	-	-	-	-	-
ENSG00000169245	CXCL10	-	Y	-	-	-	-	-
ENSG00000090339	ICAM1	-	Y	-	-	-	-	-
ENSG00000160957	RECQL4	-	Y	-	-	-	-	-
ENSG00000113763	UNC5A	-	Y	Y	-	-	-	-
ENSG00000111404	RERGL	-	Y	-	-	-	-	-
ENSG00000029153	ARNTL2	-	Y	-	-	-	-	-
ENSG00000049089	COL9A2	-	Y	-	-	-	-	-
ENSG00000108691	CCL2	-	Y	-	-	-	-	-
ENSG00000122122	SASH3	-	Y	Y	-	-	-	-
ENSG00000183918	SH2D1A	-	Y	Y	-	-	-	-
ENSG00000262814	MRPL12	-	Y	-	-	-	-	-
ENSG00000135373	EHF	-	Y	-	-	-	-	-
ENSG00000110848	CD69	-	Y	-	-	-	-	-
ENSG00000106511	MEOX2	-	Y	-	-	-	-	-
ENSG00000136250	AOAH	-	Y	-	-	-	-	-
ENSG00000243449	C4orf48	-	Y	-	-	-	-	-
ENSG00000104951	IL4I1	-	Y	-	-	-	-	-
ENSG00000185477	GPRIN3	-	Y	-	-	-	-	-
ENSG00000146072	TNFRSF21	-	Y	-	-	-	-	-
ENSG00000197457	STMN3	-	Y	-	-	-	-	-
ENSG00000161243	FBXO27	-	Y	-	-	-	-	-
ENSG00000153283	CD96	-	Y	-	-	-	-	-
ENSG00000170425	ADORA2B	-	Y	-	-	-	-	-
ENSG00000159307	SCUBE1	-	Y	-	-	-	-	-
ENSG00000172724	CCL19	-	Y	-	-	-	-	-
ENSG00000100979	PLTP	-	Y	-	-	-	-	-
ENSG00000105963	ADAP1	-	Y	-	-	-	-	-
ENSG00000138821	SLC39A8	-	Y	-	-	-	-	-
ENSG00000133317	LGALS12	-	Y	-	-	-	-	-
ENSG00000116661	FBXO2	-	Y	-	-	-	-	-
ENSG00000169508	GPR183	-	Y	-	-	-	-	-
ENSG00000143851	PTPN7	-	Y	-	-	-	-	-
ENSG00000170345	FOS	-	Y	-	-	-	-	-
ENSG00000167772	ANGPTL4	-	Y	Y	-	-	-	-
ENSG00000184986	TMEM121	-	Y	-	-	-	-	-
ENSG00000106034	CPED1	-	Y	-	-	-	-	-
ENSG00000170153	RNF150	-	Y	-	-	-	-	-
ENSG00000138083	SIX3	-	Y	-	-	-	-	-
ENSG00000182704	TSKU	-	Y	-	-	-	-	-
ENSG00000197261	C6orf141	-	Y	-	-	-	-	-
ENSG00000177575	CD163	-	Y	-	-	-	-	-
ENSG00000013725	CD6	-	Y	-	Y	-	-	-
ENSG00000118495	PLAGL1	-	Y	Y	-	-	-	-
ENSG00000090382	LYZ	-	Y	-	-	-	-	-
ENSG00000275302	CCL4	-	Y	-	-	-	-	-
ENSG00000146374	RSPO3	-	Y	-	-	-	-	-
ENSG00000143882	ATP6V1C2	-	Y	-	-	-	-	-
ENSG00000149968	MMP3	-	Y	-	-	-	-	-
ENSG00000138378	STAT4	-	Y	-	-	-	-	-
ENSG00000154269	ENPP3	-	Y	-	-	-	-	-
ENSG00000069482	GAL	-	Y	-	-	-	-	-
ENSG00000161405	IKZF3	-	Y	-	-	-	-	-
ENSG00000105246	EBI3	-	Y	-	-	-	-	-
ENSG00000166670	MMP10	-	Y	-	-	-	-	-
ENSG00000123243	ITIH5	-	Y	-	-	-	-	-
ENSG00000010030	ETV7	-	Y	-	-	-	-	-
ENSG00000003137	CYP26B1	-	Y	Y	-	-	-	-
ENSG00000132554	RGS22	-	Y	-	-	-	-	-
ENSG00000115461	IGFBP5	-	Y	-	-	-	-	-
ENSG00000046653	GPM6B	-	Y	Y	-	-	-	-
ENSG00000104814	MAP4K1	-	Y	-	-	-	-	-
ENSG00000147381	MAGEA4	-	Y	-	-	-	-	-
ENSG00000174946	GPR171	-	Y	-	-	-	-	-
ENSG00000164403	SHROOM1	-	Y	-	-	-	-	-
ENSG00000116106	EPHA4	-	Y	-	-	-	-	-
ENSG00000089012	SIRPG	-	Y	-	-	-	-	-
ENSG00000101194	SLC17A9	-	Y	-	-	-	-	-
ENSG00000141668	CBLN2	-	Y	-	-	-	-	-
ENSG00000147027	TMEM47	-	Y	Y	-	-	-	-
ENSG00000237330	RNF223	-	Y	-	-	-	-	-
ENSG00000111674	ENO2	-	Y	-	-	-	-	-
ENSG00000153002	CPB1	-	Y	-	-	-	-	-
ENSG00000169474	SPRR1A	-	Y	-	-	-	-	-
ENSG00000182600	C2orf82	-	Y	-	-	-	-	-
ENSG00000173175	ADCY5	-	Y	-	-	-	-	-
ENSG00000169906	S100G	-	Y	-	-	-	-	-
ENSG00000188820	FAM26F	-	Y	Y	-	-	-	-
ENSG00000184599	FAM19A3	-	Y	-	-	-	-	-
ENSG00000153404	PLEKHG4B	-	Y	-	-	-	-	-
ENSG00000013619	MAMLD1	-	Y	Y	-	-	-	-
ENSG00000211445	GPX3	-	Y	-	-	-	-	-
ENSG00000003436	TFPI	-	Y	-	-	-	-	-
ENSG00000118369	USP35	-	Y	-	-	-	-	-
ENSG00000263639	MSMB	-	Y	Y	-	-	-	-
ENSG00000004776	HSPB6	-	Y	-	-	-	-	-
ENSG00000082074	FYB	-	Y	-	-	-	-	-
ENSG00000175445	LPL	-	Y	-	-	-	-	-
ENSG00000184408	KCND2	-	Y	-	-	-	-	-
ENSG00000154102	C16orf74	-	Y	-	-	-	-	-
ENSG00000159871	LYPD5	-	Y	-	-	-	-	-
ENSG00000100302	RASD2	-	Y	-	-	-	-	-
ENSG00000049540	ELN	-	Y	-	-	-	-	-
ENSG00000108924	HLF	-	Y	-	-	-	-	-
ENSG00000181218	HIST3H2A	-	Y	-	-	-	-	-
ENSG00000198483	ANKRD35	-	Y	-	-	-	-	-
ENSG00000123329	ARHGAP9	-	Y	-	-	-	-	-
ENSG00000113430	IRX4	-	Y	Y	-	-	-	-
ENSG00000187955	COL14A1	-	Y	-	-	-	-	Y
ENSG00000134321	RSAD2	-	Y	-	-	-	-	-
ENSG00000148143	ZNF462	-	Y	-	-	-	-	-
ENSG00000124479	NDP	-	Y	Y	-	-	-	-
ENSG00000078401	EDN1	-	Y	-	-	-	-	-
ENSG00000138642	HERC6	-	Y	-	-	-	-	-
ENSG00000253293	HOXA10	-	Y	-	-	-	-	-
ENSG00000153721	CNKSR3	-	Y	-	-	-	-	-
ENSG00000137558	PI15	-	Y	-	-	-	-	-
ENSG00000162595	DIRAS3	-	Y	-	-	-	-	-
ENSG00000174788	PCP2	-	Y	-	-	-	-	-
ENSG00000117091	CD48	-	Y	-	-	-	-	-
ENSG00000115257	PCSK4	-	Y	-	-	-	-	-
ENSG00000181847	TIGIT	-	Y	-	-	-	-	-
ENSG00000019102	VSIG2	-	Y	-	-	-	-	-
ENSG00000175946	KLHL38	-	Y	-	-	-	-	-
ENSG00000147256	ARHGAP36	-	Y	Y	-	-	-	-
ENSG00000099194	SCD	-	Y	-	-	-	-	-
ENSG00000116824	CD2	-	Y	-	-	-	-	-
ENSG00000122877	EGR2	-	Y	-	-	-	-	-
ENSG00000088836	SLC4A11	-	Y	-	-	-	-	-
ENSG00000241794	SPRR2A	-	Y	-	-	-	-	-
ENSG00000187134	AKR1C1	-	Y	-	-	-	-	-
ENSG00000168329	CX3CR1	-	Y	-	-	-	-	-
ENSG00000198851	CD3E	-	Y	-	-	-	-	-
ENSG00000153291	SLC25A27	-	Y	-	-	-	-	-
ENSG00000132840	BHMT2	-	Y	-	-	-	-	-
ENSG00000081277	PKP1	-	Y	-	-	-	-	-
ENSG00000198759	EGFL6	-	Y	-	-	-	-	-
ENSG00000183145	RIPPLY3	-	Y	-	Y	-	-	-
ENSG00000158008	EXTL1	-	Y	-	-	-	-	-
ENSG00000106123	EPHB6	-	Y	Y	-	-	-	-
ENSG00000128016	ZFP36	-	Y	-	-	-	-	-
ENSG00000213088	ACKR1	-	Y	-	-	-	-	-
ENSG00000213886	UBD	-	Y	-	-	-	-	-
ENSG00000104419	NDRG1	-	Y	-	-	-	-	-
ENSG00000184838	PRR16	-	Y	-	-	-	-	-
ENSG00000008517	IL32	-	Y	-	-	-	-	-
ENSG00000129596	CDO1	-	Y	-	-	-	-	-
ENSG00000124772	CPNE5	-	Y	-	-	-	-	-
ENSG00000135744	AGT	-	Y	-	-	-	-	-
ENSG00000169347	GP2	-	Y	-	-	-	-	-
ENSG00000109072	VTN	-	Y	-	-	-	-	-
ENSG00000151623	NR3C2	-	Y	-	-	-	-	-
ENSG00000072818	ACAP1	-	Y	-	-	-	-	-
ENSG00000135218	CD36	-	Y	-	-	-	-	-
ENSG00000126233	SLURP1	-	Y	-	-	-	-	-
ENSG00000057593	F7	-	Y	-	-	-	-	-
ENSG00000171631	P2RY6	-	Y	-	-	-	-	-
ENSG00000170485	NPAS2	-	Y	-	-	-	-	-
ENSG00000172817	CYP7B1	-	Y	-	-	-	-	-
ENSG00000166016	ABTB2	-	Y	-	-	-	-	-
ENSG00000106211	HSPB1	-	Y	-	-	-	Y	-
ENSG00000116985	BMP8B	-	Y	-	-	-	-	-
ENSG00000229453	SPINK8	-	Y	-	-	-	-	-
ENSG00000188906	LRRK2	-	Y	-	-	-	-	Y
ENSG00000182795	C1orf116	-	Y	-	-	-	-	-
ENSG00000175183	CSRP2	-	Y	-	-	-	-	-
ENSG00000276966	HIST1H4E	-	Y	-	-	-	-	-
ENSG00000198077	CYP2A7	-	Y	-	-	-	-	-
ENSG00000163975	MFI2	-	Y	-	-	-	-	-
ENSG00000005102	MEOX1	-	Y	Y	-	-	-	-
ENSG00000078018	MAP2	-	Y	-	-	-	-	-
ENSG00000167653	PSCA	-	Y	-	-	-	-	-
ENSG00000172116	CD8B	-	Y	-	-	-	-	-
ENSG00000092969	TGFB2	-	Y	-	-	-	-	-
ENSG00000160183	TMPRSS3	-	Y	-	-	-	-	-
ENSG00000241644	INMT	-	Y	-	-	-	-	-
ENSG00000138207	RBP4	-	Y	-	-	-	-	-
ENSG00000179256	SMCO3	-	Y	-	-	-	-	-
ENSG00000116194	ANGPTL1	-	Y	-	-	-	-	-
ENSG00000178934	LGALS7B	-	Y	-	-	-	-	-
ENSG00000134326	CMPK2	-	Y	-	-	-	-	-
ENSG00000171119	NRTN	-	Y	-	-	-	-	-
ENSG00000168062	BATF2	-	Y	-	-	-	-	-
ENSG00000144355	DLX1	-	Y	-	-	-	-	-
ENSG00000152661	GJA1	-	Y	-	-	-	-	-
ENSG00000079931	MOXD1	-	Y	-	-	-	-	-
ENSG00000166819	PLIN1	-	Y	-	-	-	-	-
ENSG00000140368	PSTPIP1	-	Y	-	-	-	-	-
ENSG00000183778	B3GALT5	-	Y	-	-	-	-	-
ENSG00000185015	CA13	-	Y	-	-	-	-	-
ENSG00000160339	FCN2	-	Y	-	-	-	-	-
ENSG00000185290	NUPR1L	-	Y	-	-	-	-	-
ENSG00000105880	DLX5	-	Y	-	-	-	-	-
ENSG00000244734	HBB	-	Y	-	-	-	-	-
ENSG00000100003	SEC14L2	-	Y	-	-	-	-	-
ENSG00000174175	SELP	-	Y	-	-	-	-	-
ENSG00000103522	IL21R	-	Y	-	-	-	-	-
ENSG00000106809	OGN	-	Y	-	-	-	-	-
ENSG00000158406	HIST1H4H	-	Y	-	-	-	-	-
ENSG00000121005	CRISPLD1	-	Y	-	-	-	-	-
ENSG00000133392	MYH11	-	Y	-	-	-	Y	-
ENSG00000110169	HPX	-	Y	-	-	-	-	-
ENSG00000119922	IFIT2	-	Y	-	-	-	-	-
ENSG00000171954	CYP4F22	-	Y	-	-	-	-	-
ENSG00000185483	ROR1	-	Y	-	-	-	-	-
ENSG00000134769	DTNA	-	Y	-	-	-	-	-
ENSG00000145284	SCD5	-	Y	-	-	-	-	-
ENSG00000182379	NXPH4	-	Y	-	-	-	-	-
ENSG00000119535	CSF3R	-	Y	-	-	-	-	-
ENSG00000151632	AKR1C2	-	Y	-	-	-	-	-
ENSG00000262406	MMP12	-	Y	-	-	-	-	-
ENSG00000185338	SOCS1	-	Y	-	-	-	-	-
ENSG00000091138	SLC26A3	-	Y	-	-	-	-	-
ENSG00000168243	GNG4	-	Y	-	-	-	-	-
ENSG00000183479	TREX2	-	Y	Y	-	-	-	-
ENSG00000214978	RP11-477N12.3	-	Y	-	-	-	-	-
ENSG00000188373	C10orf99	-	Y	-	-	-	-	-
ENSG00000135205	CCDC146	-	Y	-	-	-	-	-
ENSG00000188175	HEPACAM2	-	Y	-	-	-	-	-
ENSG00000158022	TRIM63	-	Y	-	-	-	-	-
ENSG00000213397	HAUS7	-	Y	Y	-	-	-	-
ENSG00000196188	CTSE	-	Y	-	-	-	-	-
ENSG00000168878	SFTPB	-	Y	-	-	-	-	-
ENSG00000187726	DNAJB13	-	Y	-	-	-	-	-
ENSG00000147614	ATP6V0D2	-	Y	-	-	-	-	-
ENSG00000081985	IL12RB2	-	Y	-	-	-	-	-
ENSG00000243709	LEFTY1	-	Y	-	-	-	-	-
ENSG00000075886	TUBA3D	-	Y	-	-	-	-	-
ENSG00000163735	CXCL5	-	Y	Y	-	-	-	-
ENSG00000184908	CLCNKB	-	Y	-	-	-	-	-
ENSG00000086159	AQP6	-	Y	-	-	-	-	-
ENSG00000084674	APOB	-	Y	-	-	-	-	-
ENSG00000026297	RNASET2	-	Y	-	-	-	-	-
ENSG00000188060	RAB42	-	Y	-	-	-	-	-
ENSG00000035720	STAP1	-	Y	-	-	-	-	-
ENSG00000109684	CLNK	-	Y	-	-	-	-	-
ENSG00000178150	ZNF114	-	Y	-	-	-	-	-
ENSG00000132698	RAB25	-	Y	-	-	-	Y	-
ENSG00000148600	CDHR1	-	Y	-	-	-	-	-
ENSG00000110680	CALCA	-	Y	-	-	-	-	-
ENSG00000167748	KLK1	-	Y	-	-	-	-	-
ENSG00000147606	SLC26A7	-	Y	-	-	-	-	-
ENSG00000165887	ANKRD2	-	Y	-	-	-	-	-
ENSG00000136110	LECT1	-	Y	-	-	-	-	-
ENSG00000178776	C5orf46	-	Y	-	-	-	-	-
ENSG00000214128	TMEM213	-	Y	-	-	-	-	-
ENSG00000157315	TMED6	-	Y	-	-	-	-	-
ENSG00000173253	DMRT2	-	Y	-	-	-	-	-
ENSG00000173698	GPR64	-	Y	Y	-	-	-	-
ENSG00000111319	SCNN1A	-	Y	-	-	-	-	-
ENSG00000123106	CCDC91	-	Y	-	-	-	-	-
ENSG00000138100	TRIM54	-	Y	-	-	-	-	-
ENSG00000001626	CFTR	-	Y	-	-	-	-	Y
ENSG00000185274	WBSCR17	-	Y	-	-	-	-	-
ENSG00000151418	ATP6V1G3	-	Y	-	-	-	-	-
ENSG00000187957	DNER	-	Y	-	-	-	-	-
ENSG00000111863	ADTRP	-	Y	-	-	-	-	-
ENSG00000064205	WISP2	-	Y	-	-	-	-	-
ENSG00000087128	TMPRSS11E	-	Y	Y	-	-	-	-
ENSG00000155066	PROM2	-	Y	-	-	-	-	-
ENSG00000162399	BSND	-	Y	-	-	-	-	-
ENSG00000182107	TMEM30B	-	Y	-	-	-	-	-
ENSG00000004939	SLC4A1	-	Y	-	-	-	-	-
ENSG00000168298	HIST1H1E	-	Y	-	-	-	-	-
ENSG00000120645	IQSEC3	-	Y	-	-	-	-	-
ENSG00000167992	VWCE	-	Y	-	-	-	-	-
ENSG00000168907	PLA2G4F	-	Y	-	-	-	-	-
ENSG00000132677	RHBG	-	Y	-	-	-	-	-
ENSG00000146755	TRIM50	-	Y	-	-	-	-	-
ENSG00000116039	ATP6V1B1	-	Y	-	-	-	-	-
ENSG00000164932	CTHRC1	-	Y	-	-	-	-	-
ENSG00000115590	IL1R2	-	Y	-	-	-	-	-
ENSG00000101443	WFDC2	-	Y	-	-	-	-	-
ENSG00000138356	AOX1	-	Y	-	-	-	-	-
ENSG00000277157	HIST1H4D	-	Y	-	-	-	-	-
ENSG00000170290	SLN	-	Y	-	-	-	-	-
ENSG00000187048	CYP4A11	-	Y	-	-	-	-	-
ENSG00000197061	HIST1H4C	-	Y	-	-	-	-	-
ENSG00000248144	ADH1C	-	Y	-	-	-	-	-
ENSG00000112541	PDE10A	-	Y	-	-	-	-	-
ENSG00000104112	SCG3	-	Y	-	-	-	-	-
ENSG00000156284	CLDN8	-	Y	-	-	-	-	-
ENSG00000145358	DDIT4L	-	Y	-	-	-	-	-
ENSG00000158874	APOA2	-	Y	-	-	-	-	-
ENSG00000122133	PAEP	-	Y	-	-	-	-	-
ENSG00000185133	INPP5J	-	Y	-	-	-	-	-
ENSG00000126218	F10	-	Y	-	-	-	-	-
ENSG00000172260	NEGR1	-	Y	-	-	-	-	-
ENSG00000172346	CSDC2	-	Y	-	-	-	-	-
ENSG00000113889	KNG1	-	Y	-	-	-	-	-
ENSG00000131183	SLC34A1	-	Y	-	-	-	-	-
ENSG00000184012	TMPRSS2	-	Y	-	-	-	-	-
ENSG00000137204	SLC22A7	-	Y	-	-	-	-	-
ENSG00000162365	CYP4A22	-	Y	-	-	-	-	-
ENSG00000146678	IGFBP1	-	Y	-	-	-	-	-
ENSG00000159763	PIP	-	Y	-	-	-	-	-
ENSG00000118137	APOA1	-	Y	-	-	-	-	-
ENSG00000116882	HAO2	-	Y	-	-	-	-	-
ENSG00000103569	AQP9	-	Y	-	-	-	-	-
ENSG00000125355	TMEM255A	-	Y	Y	-	-	-	-
ENSG00000197891	SLC22A12	-	Y	-	-	-	-	-
ENSG00000162897	FCAMR	-	Y	-	-	-	-	-
ENSG00000102678	FGF9	-	Y	Y	-	-	-	-
ENSG00000186510	CLCNKA	-	Y	-	-	-	-	-
ENSG00000164266	SPINK1	-	Y	-	-	-	-	-
ENSG00000180210	F2	-	Y	-	-	-	-	-
ENSG00000184363	PKP3	-	Y	-	-	-	-	-
ENSG00000167749	KLK4	-	Y	-	-	-	-	-
ENSG00000115112	TFCP2L1	-	Y	-	-	-	-	-
ENSG00000138696	BMPR1B	-	Y	-	-	-	-	-
ENSG00000174358	SLC6A19	-	Y	-	-	-	-	-
ENSG00000132821	VSTM2L	-	Y	-	-	-	-	-
ENSG00000118271	TTR	-	Y	-	-	-	-	-
ENSG00000135480	KRT7	-	Y	Y	-	-	-	-
ENSG00000044012	GUCA2B	-	Y	-	-	-	-	-
ENSG00000159387	IRX6	-	Y	-	-	-	-	-
ENSG00000175785	PRIMA1	-	Y	Y	-	-	-	-
ENSG00000105048	TNNT1	-	Y	-	-	-	-	-
ENSG00000166143	PPP1R14D	-	Y	-	-	-	-	-
ENSG00000168333	C8orf22	-	Y	-	-	-	-	-
ENSG00000110245	APOC3	-	Y	-	-	-	-	-
ENSG00000205279	CTXN3	-	Y	-	-	-	-	-
ENSG00000142549	IGLON5	-	Y	-	-	-	-	-
ENSG00000186766	FOXI2	-	Y	-	-	-	-	-
ENSG00000205358	MT1H	-	Y	-	-	-	-	-
ENSG00000150201	FXYD4	-	Y	-	-	-	-	-
ENSG00000197901	SLC22A6	-	Y	-	-	-	-	-
ENSG00000175121	WFDC5	-	Y	-	-	-	-	-
ENSG00000143954	REG3G	-	Y	Y	-	-	-	-
ENSG00000169344	UMOD	-	Y	-	-	-	-	-
ENSG00000133020	MYH8	-	Y	-	-	-	-	-
ENSG00000122711	SPINK4	-	Y	-	-	-	-	-
ENSG00000173404	INSM1	-	Y	-	-	-	-	-
ENSG00000160181	TFF2	-	Y	-	-	-	-	-
ENSG00000165828	PRAP1	-	Y	-	-	-	-	-
ENSG00000104327	CALB1	-	Y	-	-	-	-	-
ENSG00000185269	NOTUM	-	Y	Y	-	-	-	-
ENSG00000134193	REG4	-	Y	-	-	-	-	-
ENSG00000104371	DKK4	-	Y	-	-	-	-	-
ENSG00000178343	SHISA3	-	Y	Y	-	-	-	-
ENSG00000134363	FST	-	Y	-	-	-	-	-
ENSG00000179914	ITLN1	-	Y	-	-	-	-	-
ENSG00000171431	KRT20	-	Y	-	-	-	-	-
ENSG00000211452	DIO1	-	Y	-	-	-	-	-
ENSG00000128564	VGF	-	Y	-	-	-	-	-
ENSG00000198883	PNMA5	-	Y	-	-	-	-	-
ENSG00000142319	SLC6A3	-	Y	-	-	-	-	-
ENSG00000204616	TRIM31	-	Y	-	-	-	-	-
ENSG00000125851	PCSK2	-	Y	-	-	-	-	-
ENSG00000109511	ANXA10	-	Y	-	-	-	-	-
ENSG00000136059	VILL	-	Y	-	-	-	-	-
ENSG00000099937	SERPIND1	-	Y	-	-	-	-	-
ENSG00000124260	MAGEA10	-	Y	-	-	-	-	-
ENSG00000099834	CDHR5	-	Y	-	-	-	-	-
ENSG00000186529	CYP4F3	-	Y	-	Y	-	-	-
ENSG00000198681	MAGEA1	-	Y	-	-	-	-	-
ENSG00000108244	KRT23	-	Y	-	-	-	-	-
ENSG00000183607	GKN2	-	Y	-	-	-	-	-
ENSG00000015520	NPC1L1	-	Y	-	-	-	-	-
ENSG00000081051	AFP	-	Y	-	-	-	-	-
ENSG00000182327	GLTPD2	-	Y	-	-	-	-	-
ENSG00000132437	DDC	-	Y	-	-	-	-	-
ENSG00000126890	CTAG2	-	Y	-	-	-	-	-
ENSG00000198758	EPS8L3	-	Y	-	-	-	-	-
ENSG00000108242	CYP2C18	-	Y	-	-	-	-	-
ENSG00000114638	UPK1B	-	Y	-	-	-	-	-
ENSG00000184486	POU3F2	-	Y	-	-	-	-	-
ENSG00000197520	FAM177B	-	Y	-	-	-	-	-
ENSG00000023839	ABCC2	-	Y	-	-	-	-	-
ENSG00000142484	TM4SF5	-	Y	-	-	-	-	-
ENSG00000198610	AKR1C4	-	Y	-	-	-	-	-
ENSG00000108602	ALDH3A1	-	Y	-	-	-	-	-
ENSG00000095932	SMIM24	-	Y	-	-	-	-	-
ENSG00000215182	MUC5AC	-	Y	-	-	-	-	-
ENSG00000006611	USH1C	-	Y	-	-	-	-	-
ENSG00000167080	B4GALNT2	-	Y	-	-	-	-	-
ENSG00000122585	NPY	-	Y	-	-	-	-	-
ENSG00000214814	FER1L6	-	Y	-	-	-	-	Y
ENSG00000096088	PGC	-	Y	-	-	-	-	-
ENSG00000021826	CPS1	-	Y	-	-	-	-	-
ENSG00000125571	IL37	-	Y	-	-	-	-	-
ENSG00000230657	PRB4	-	Y	-	-	-	-	-
ENSG00000131050	BPIFA2	-	Y	-	-	-	-	-
ENSG00000168703	WFDC12	-	Y	-	-	-	-	-
ENSG00000173237	C11orf86	-	Y	Y	-	-	-	-
ENSG00000139219	COL2A1	-	Y	-	-	-	-	-
ENSG00000179674	ARL14	-	Y	-	-	-	-	-
ENSG00000164816	DEFA5	-	Y	-	-	-	-	-
ENSG00000234068	PAGE2	-	Y	-	-	-	-	-
ENSG00000198930	CSAG1	-	Y	-	-	-	-	-
ENSG00000046774	MAGEC2	-	Y	-	-	-	-	-
ENSG00000227234	SPANXB2	-	Y	-	-	-	-	-
ENSG00000120211	INSL4	-	Y	-	-	-	-	-
ENSG00000100665	SERPINA4	-	Y	-	-	-	-	-
ENSG00000145321	GC	-	Y	-	-	-	-	-
ENSG00000157005	SST	-	Y	-	-	-	-	-
ENSG00000213401	MAGEA12	-	Y	-	-	-	-	-
ENSG00000221867	MAGEA3	-	Y	-	-	-	-	-
ENSG00000012817	KDM5D	-	Y	Y	-	-	-	-
ENSG00000067048	DDX3Y	-	Y	Y	-	-	-	-
ENSG00000067646	ZFY	-	Y	Y	-	-	-	-
ENSG00000114374	USP9Y	-	Y	Y	-	-	-	-
ENSG00000154620	TMSB4Y	-	Y	Y	-	-	-	-
ENSG00000165246	NLGN4Y	-	Y	Y	-	-	-	-
ENSG00000198692	EIF1AY	-	Y	Y	-	-	-	-
ENSG00000131400	NAPSA	-	Y	-	-	-	-	-
ENSG00000156466	GDF6	-	Y	-	-	-	-	-
ENSG00000175097	RAG2	-	Y	-	-	-	-	-
ENSG00000105641	SLC5A5	-	Y	-	-	-	-	-
ENSG00000204595	DPRX	-	Y	-	-	-	-	-
ENSG00000170373	CST1	-	Y	-	-	-	-	-
ENSG00000100285	NEFH	-	Y	-	-	-	-	-
ENSG00000161905	ALOX15	-	Y	-	-	-	-	-
ENSG00000167972	ABCA3	-	Y	Y	-	-	-	-
ENSG00000125813	PAX1	-	Y	-	-	-	-	-
ENSG00000066923	STAG3	-	Y	-	-	-	-	-
ENSG00000163273	NPPC	-	Y	-	-	-	-	-
ENSG00000185615	PDIA2	-	Y	-	-	-	-	-
ENSG00000171360	KRT38	-	Y	-	-	-	-	-
ENSG00000007350	TKTL1	-	Y	-	-	-	-	-
ENSG00000176907	C8orf4	-	Y	Y	-	-	-	-
ENSG00000165810	BTNL9	-	Y	-	-	-	-	-
ENSG00000186998	EMID1	-	Y	-	-	-	-	-
ENSG00000133134	BEX2	-	Y	Y	-	-	-	-
ENSG00000007171	NOS2	-	Y	-	-	-	-	-
ENSG00000178445	GLDC	-	Y	-	-	-	-	-
ENSG00000162878	PKDCC	-	Y	-	-	-	-	-
ENSG00000159263	SIM2	-	Y	-	-	-	-	-
ENSG00000145287	PLAC8	-	Y	-	-	-	-	-
ENSG00000172379	ARNT2	-	Y	-	-	-	-	-
ENSG00000165215	CLDN3	-	Y	-	-	-	-	-
ENSG00000170323	FABP4	-	Y	-	-	-	-	-
ENSG00000146197	SCUBE3	-	Y	-	-	-	-	-
ENSG00000196074	SYCP2	-	Y	-	-	-	-	-
ENSG00000147257	GPC3	-	Y	Y	-	-	-	-
ENSG00000163736	PPBP	-	Y	-	-	-	-	-
ENSG00000165643	SOHLH1	-	Y	-	-	-	-	-
ENSG00000129514	FOXA1	-	Y	-	-	-	-	-
ENSG00000136931	NR5A1	-	Y	-	-	-	-	-
ENSG00000182585	EPGN	-	Y	-	-	-	-	-
ENSG00000172867	KRT2	-	Y	-	-	-	-	-
ENSG00000133169	BEX1	-	Y	Y	-	-	-	-
ENSG00000160180	TFF3	-	Y	-	-	-	-	-
ENSG00000134873	CLDN10	-	Y	-	-	-	-	-
ENSG00000184368	MAP7D2	-	Y	Y	-	-	-	-
ENSG00000215853	RPTN	-	Y	Y	-	-	-	-
ENSG00000125780	TGM3	-	Y	-	-	-	-	-
ENSG00000114200	BCHE	-	Y	-	-	-	-	-
ENSG00000145879	SPINK7	-	Y	-	-	-	-	-
ENSG00000203786	KPRP	-	Y	-	-	-	-	-
ENSG00000142700	DMRTA2	-	Y	-	-	-	-	-
ENSG00000156282	CLDN17	-	Y	-	-	-	-	-
ENSG00000162344	FGF19	-	Y	-	-	-	-	-
ENSG00000269586	CT45A10	-	Y	-	-	-	-	-
ENSG00000102195	GPR50	-	Y	Y	-	-	-	Y
ENSG00000125999	BPIFB1	-	Y	-	-	-	-	-
ENSG00000126549	STATH	-	Y	-	-	-	-	-
ENSG00000171195	MUC7	-	Y	-	-	-	-	-
ENSG00000147434	CHRNA6	-	Y	-	-	-	-	-
ENSG00000186907	RTN4RL2	-	Y	-	-	-	-	-
ENSG00000186009	ATP4B	-	Y	-	-	-	-	-
ENSG00000169507	SLC38A11	-	Y	-	-	-	-	-
ENSG00000158104	HPD	-	Y	-	-	-	-	-
ENSG00000150594	ADRA2A	-	Y	-	-	-	-	-
ENSG00000166292	TMEM100	-	Y	-	-	-	-	-
ENSG00000173809	TDRD12	-	Y	-	-	-	-	-
ENSG00000002745	WNT16	-	Y	-	-	-	-	-
ENSG00000187690	CXorf67	-	Y	Y	-	-	-	-
ENSG00000048540	LMO3	-	Y	-	-	-	-	-
ENSG00000118702	GHRH	-	Y	-	-	-	-	-
ENSG00000167916	KRT24	-	Y	-	-	-	-	-
ENSG00000131620	ANO1	-	Y	-	-	Y	-	-
ENSG00000133124	IRS4	-	Y	Y	-	-	-	-
ENSG00000125726	CD70	-	Y	-	-	-	-	-
ENSG00000136352	NKX2-1	-	Y	-	-	-	-	-
ENSG00000189182	KRT77	-	Y	-	-	-	-	-
ENSG00000073067	CYP2W1	-	Y	-	-	-	-	-
ENSG00000166959	MS4A8	-	Y	-	-	-	-	-
ENSG00000198691	ABCA4	-	Y	-	-	-	-	-
ENSG00000205362	MT1A	-	Y	-	-	-	-	-
ENSG00000164690	SHH	-	Y	-	-	-	-	-
ENSG00000144834	TAGLN3	-	Y	-	-	-	-	-
ENSG00000167768	KRT1	-	Y	-	-	-	-	-
ENSG00000182938	OTOP3	-	Y	-	-	-	-	-
ENSG00000229415	SFTA3	-	Y	-	-	-	-	-
ENSG00000139292	LGR5	-	Y	-	-	-	-	-
ENSG00000184502	GAST	-	Y	-	-	-	-	-
ENSG00000268940	CT45A1	-	Y	-	-	-	-	-
ENSG00000244067	GSTA2	-	Y	-	-	-	-	-
ENSG00000189064	GAGE2A	-	Y	-	-	-	-	-
ENSG00000143536	CRNN	-	Y	-	-	-	-	-
ENSG00000134551	PRH2	-	Y	-	-	-	-	-
ENSG00000197870	PRB3	-	Y	-	-	-	-	-
ENSG00000205649	HTN3	-	Y	-	-	-	-	-
ENSG00000139988	RDH12	-	Y	-	-	-	-	-
ENSG00000189056	RELN	-	Y	-	-	-	-	Y
ENSG00000148795	CYP17A1	-	Y	-	-	-	-	-
ENSG00000042832	TG	-	Y	-	-	-	-	Y
ENSG00000244617	ASPRV1	-	Y	-	-	-	-	-
ENSG00000141469	SLC14A1	-	Y	-	-	-	-	-
ENSG00000237412	PRSS56	-	Y	-	-	-	-	-
ENSG00000160882	CYP11B1	-	Y	-	-	-	-	-
ENSG00000171403	KRT9	-	Y	-	-	-	-	-
ENSG00000128606	LRRC17	-	Y	-	-	-	-	-
ENSG00000166396	SERPINB7	-	Y	-	-	-	-	-
ENSG00000104140	RHOV	-	Y	-	-	-	-	-
ENSG00000126550	HTN1	-	Y	-	-	-	-	-
ENSG00000121335	PRB2	-	Y	-	-	-	-	-
ENSG00000203859	HSD3B2	-	Y	-	-	-	-	-
ENSG00000256812	CAPNS2	-	Y	-	-	-	-	-
ENSG00000171345	KRT19	-	Y	-	-	-	-	-
ENSG00000167767	KRT80	-	Y	-	-	-	-	-
ENSG00000166558	SLC38A8	-	Y	-	-	-	-	-
ENSG00000171346	KRT15	-	Y	-	-	-	-	-
ENSG00000143194	MAEL	-	Y	-	-	-	-	-
ENSG00000125879	OTOR	-	Y	-	-	-	-	-
ENSG00000197084	LCE1C	-	Y	-	-	-	-	-
ENSG00000163202	LCE3D	-	Y	-	-	-	-	-
ENSG00000196734	LCE1B	-	Y	-	-	-	-	-
ENSG00000204421	LY6G6C	-	Y	Y	-	-	-	-
ENSG00000171402	XAGE3	-	Y	-	-	-	-	-
ENSG00000136881	BAAT	-	Y	-	-	-	-	-
ENSG00000203785	SPRR2E	-	Y	-	-	-	-	-
ENSG00000159516	SPRR2G	-	Y	-	-	-	-	-
ENSG00000112280	COL9A1	-	Y	-	-	-	-	-
ENSG00000134765	DSC1	-	Y	-	-	-	-	-
ENSG00000188293	IGFL1	-	Y	-	-	-	-	-
ENSG00000163207	IVL	-	Y	-	-	-	-	-
ENSG00000186844	LCE1A	-	Y	-	-	-	-	-
ENSG00000198854	C1orf68	-	Y	Y	-	-	-	-
ENSG00000240386	LCE1F	-	Y	-	-	-	-	-
ENSG00000167244	IGF2	-	Y	Y	-	-	-	-
ENSG00000142619	PADI3	-	Y	-	-	-	-	-
ENSG00000184357	HIST1H1B	-	Y	-	-	-	-	-
ENSG00000112299	VNN1	-	Y	-	-	-	-	-
ENSG00000175868	CALCB	-	Y	-	-	-	-	-
ENSG00000142515	KLK3	-	Y	-	-	-	-	-
ENSG00000087085	ACHE	-	Y	-	-	-	-	-
ENSG00000140505	CYP1A2	-	Y	-	-	-	-	-
ENSG00000151012	SLC7A11	-	Y	-	-	-	-	-
ENSG00000172264	MACROD2	-	Y	-	-	-	-	-
ENSG00000114948	ADAM23	-	Y	-	-	-	-	-
ENSG00000107562	CXCL12	-	Y	-	-	-	-	-
ENSG00000196620	UGT2B15	-	Y	-	-	-	-	-
ENSG00000204531	POU5F1	-	Y	-	-	-	-	-
ENSG00000275395	FCGBP	-	Y	-	-	-	-	Y
ENSG00000108511	HOXB6	-	Y	-	-	-	-	-
ENSG00000125618	PAX8	-	Y	-	-	-	Y	-
ENSG00000204538	PSORS1C2	-	Y	-	-	-	-	-
ENSG00000254415	SIGLEC14	-	Y	-	-	-	-	-
ENSG00000120068	HOXB8	-	Y	-	-	-	-	-
ENSG00000277586	NEFL	-	Y	Y	-	-	-	-
ENSG00000109193	SULT1E1	-	Y	-	-	-	-	-
ENSG00000171234	UGT2B7	-	Y	-	-	-	-	-
ENSG00000135919	SERPINE2	-	Y	-	-	-	-	-
ENSG00000127863	TNFRSF19	-	Y	-	-	-	-	-
ENSG00000143839	REN	-	Y	-	-	-	-	-
ENSG00000104415	WISP1	-	Y	-	-	-	-	-
ENSG00000198033	TUBA3C	-	Y	-	-	-	-	-
ENSG00000139209	SLC38A4	-	Y	-	-	-	-	-
ENSG00000058085	LAMC2	-	Y	-	-	-	-	-
ENSG00000162706	CADM3	-	Y	-	-	-	-	-
ENSG00000090659	CD209	-	Y	-	-	-	-	-
ENSG00000214415	GNAT3	-	Y	-	-	-	-	-
ENSG00000101049	SGK2	-	Y	-	-	-	-	-
ENSG00000167434	CA4	-	Y	-	-	-	-	-
ENSG00000141744	PNMT	-	Y	-	-	-	-	-
ENSG00000100448	CTSG	-	Y	-	-	-	-	-
ENSG00000203857	HSD3B1	-	Y	-	-	-	-	-
ENSG00000053438	NNAT	-	Y	-	-	-	-	-
ENSG00000167941	SOST	-	Y	-	-	-	-	-
ENSG00000183128	CALHM3	-	Y	-	-	-	-	-
ENSG00000135220	UGT2A3	-	Y	-	-	-	-	-
ENSG00000169436	COL22A1	-	Y	-	-	-	-	-
ENSG00000186281	GPAT2	-	Y	-	-	-	-	-
ENSG00000094796	KRT31	-	Y	-	-	-	-	-
ENSG00000106178	CCL24	-	Y	-	-	-	-	-
ENSG00000166961	MS4A15	-	Y	-	-	-	-	-
ENSG00000213030	CGB8	-	Y	-	-	-	-	-
ENSG00000186526	CYP4F8	-	Y	-	-	-	-	-
ENSG00000147571	CRH	-	Y	-	-	-	-	-
ENSG00000166863	TAC3	-	Y	-	-	-	-	-
ENSG00000244094	SPRR2F	-	Y	-	-	-	-	-
ENSG00000233041	PHGR1	-	Y	-	-	-	-	-
ENSG00000113249	HAVCR1	-	Y	Y	-	-	-	-
ENSG00000100721	TCL1A	-	Y	-	-	-	-	-
ENSG00000178172	SPINK6	-	Y	-	-	-	-	-
ENSG00000149948	HMGA2	-	Y	Y	-	-	-	-
ENSG00000159182	PRAC1	-	Y	-	-	-	-	-
ENSG00000185966	LCE3E	-	Y	-	-	-	-	-
ENSG00000106278	PTPRZ1	-	Y	-	-	-	-	-
ENSG00000145192	AHSG	-	Y	-	-	-	-	-
ENSG00000161395	PGAP3	-	Y	-	-	-	-	-
ENSG00000170054	SERPINA9	-	Y	-	-	-	-	-
ENSG00000141738	GRB7	-	Y	-	-	-	Y	-
ENSG00000100867	DHRS2	-	Y	-	-	-	-	-
ENSG00000151655	ITIH2	-	Y	-	-	-	-	-
ENSG00000175535	PNLIP	-	Y	-	-	-	-	Y
ENSG00000068985	PAGE1	-	Y	-	-	-	-	-
ENSG00000124875	CXCL6	-	Y	-	-	-	-	-
ENSG00000099399	MAGEB2	-	Y	Y	-	-	-	-
ENSG00000174502	SLC26A9	-	Y	-	-	-	-	-
ENSG00000137860	SLC28A2	-	Y	-	-	-	-	-
ENSG00000171246	NPTX1	-	Y	-	-	-	-	-
ENSG00000238269	PAGE2B	-	Y	-	-	-	-	-
ENSG00000164822	DEFA6	-	Y	-	-	-	-	-
ENSG00000259823	LYPD8	-	Y	-	-	-	-	-
ENSG00000256713	PGA5	-	Y	-	-	-	-	-
ENSG00000080293	SCTR	-	Y	Y	-	-	-	-
ENSG00000173621	LRFN4	-	Y	-	-	-	-	-
ENSG00000101846	STS	-	Y	-	-	-	-	-
ENSG00000124920	MYRF	-	Y	-	-	-	-	-
ENSG00000172927	MYEOV	-	Y	-	-	-	-	-
ENSG00000182272	B4GALNT4	-	Y	-	-	-	-	-
ENSG00000082196	C1QTNF3	-	Y	-	-	-	-	-
ENSG00000143512	HHIPL2	-	Y	-	-	-	-	-
ENSG00000005001	PRSS22	-	Y	-	-	-	-	-
ENSG00000092096	SLC22A17	-	Y	-	-	-	-	-
ENSG00000007306	CEACAM7	-	Y	-	-	-	-	-
ENSG00000187720	THSD4	-	Y	-	-	-	-	-
ENSG00000169688	MT1B	-	Y	-	-	-	-	-
ENSG00000152583	SPARCL1	-	Y	-	-	-	-	-
ENSG00000240583	AQP1	-	Y	-	-	-	-	-
ENSG00000169783	LINGO1	-	Y	-	-	-	-	-
ENSG00000170962	PDGFD	-	Y	-	-	-	-	-
ENSG00000092929	UNC13D	-	Y	-	-	-	-	-
ENSG00000053918	KCNQ1	-	Y	Y	-	-	-	-
ENSG00000105426	PTPRS	-	Y	-	-	-	-	-
ENSG00000137563	GGH	-	Y	-	-	-	-	-
ENSG00000165197	FIGF	-	Y	Y	-	-	-	-
ENSG00000156966	B3GNT7	-	Y	-	-	-	-	-
ENSG00000205795	CYS1	-	Y	-	-	-	-	-
ENSG00000146038	DCDC2	-	Y	Y	-	-	-	-
ENSG00000105514	RAB3D	-	Y	-	-	-	-	-
ENSG00000163235	TGFA	-	Y	-	-	-	-	-
ENSG00000145555	MYO10	-	Y	-	-	-	-	-
ENSG00000267795	SMIM22	-	Y	-	-	-	-	-
ENSG00000137959	IFI44L	-	Y	-	-	-	-	-
ENSG00000077522	ACTN2	-	Y	-	-	-	-	-
ENSG00000019505	SYT13	-	Y	-	-	-	-	-
ENSG00000134258	VTCN1	-	Y	-	-	-	Y	-
ENSG00000105290	APLP1	-	Y	-	-	-	-	-
ENSG00000158560	DYNC1I1	-	Y	-	-	-	-	-
ENSG00000162383	SLC1A7	-	Y	-	-	-	-	-
ENSG00000118777	ABCG2	-	Y	-	-	-	-	-
ENSG00000129757	CDKN1C	-	Y	-	-	-	-	-
ENSG00000124564	SLC17A3	-	Y	-	-	-	-	-
ENSG00000035115	SH3YL1	-	Y	-	-	-	-	-
ENSG00000006118	TMEM132A	-	Y	-	-	-	-	-
ENSG00000159618	GPR114	-	Y	-	-	-	-	-
ENSG00000132470	ITGB4	-	Y	-	-	-	-	-
ENSG00000140465	CYP1A1	-	Y	-	-	-	-	-
ENSG00000158014	SLC30A2	-	Y	-	-	-	-	-
ENSG00000072422	RHOBTB1	-	Y	-	-	-	-	-
ENSG00000172016	REG3A	-	Y	-	-	-	-	-
ENSG00000167642	SPINT2	-	Y	-	-	-	-	-
ENSG00000167608	TMC4	-	Y	-	-	-	-	-
ENSG00000172023	REG1B	-	Y	-	-	-	-	-
ENSG00000165238	WNK2	-	Y	-	-	-	-	-
ENSG00000166145	SPINT1	-	Y	-	-	-	-	-
ENSG00000066032	CTNNA2	-	Y	-	-	-	-	-
ENSG00000105655	ISYNA1	-	Y	-	-	-	-	-
ENSG00000165953	SERPINA12	-	Y	-	-	-	-	-
ENSG00000112183	RBM24	-	Y	-	-	-	-	-
ENSG00000101951	PAGE4	-	Y	Y	-	-	-	-
ENSG00000178860	MSC	-	Y	Y	-	-	-	-
ENSG00000120262	CCDC170	-	Y	-	-	-	-	-
ENSG00000108448	TRIM16L	-	Y	-	-	-	-	-
ENSG00000181541	MAB21L2	-	Y	-	-	-	-	-
ENSG00000158516	CPA2	-	Y	-	-	-	-	-
ENSG00000091482	SMPX	-	Y	Y	-	-	-	-
ENSG00000137731	FXYD2	-	Y	-	-	-	-	-
ENSG00000112559	MDFI	-	Y	-	-	-	-	-
ENSG00000147223	RIPPLY1	-	Y	Y	-	-	-	-
ENSG00000091704	CPA1	-	Y	-	-	-	-	-
ENSG00000072840	EVC	-	Y	-	-	-	-	-
ENSG00000115386	REG1A	-	Y	-	-	-	-	-
ENSG00000116260	QSOX1	-	Y	-	-	-	-	-
ENSG00000128242	GAL3ST1	-	Y	-	-	-	-	-
ENSG00000143125	PROK1	-	Y	-	-	-	-	-
ENSG00000066230	SLC9A3	-	Y	-	-	-	-	-
ENSG00000114270	COL7A1	-	Y	-	-	-	-	-
ENSG00000110436	SLC1A2	-	Y	Y	-	-	-	-
ENSG00000196557	CACNA1H	-	Y	-	-	-	-	Y
ENSG00000158296	SLC13A3	-	Y	-	-	-	-	-
ENSG00000164638	SLC29A4	-	Y	-	-	-	-	-
ENSG00000275152	CCL16	-	Y	-	-	-	-	-
ENSG00000166148	AVPR1A	-	Y	-	-	-	-	-
ENSG00000096433	ITPR3	-	Y	-	-	-	-	-
ENSG00000164181	ELOVL7	-	Y	-	-	-	-	-
ENSG00000135821	GLUL	-	Y	-	-	-	-	-
ENSG00000163082	SGPP2	-	Y	-	-	-	-	-
ENSG00000187193	MT1X	-	Y	-	-	-	-	-
ENSG00000106236	NPTX2	-	Y	-	-	-	-	-
ENSG00000161249	DMKN	-	Y	-	-	-	-	-
ENSG00000178882	FAM101A	-	Y	-	-	-	-	-
ENSG00000091129	NRCAM	-	Y	-	-	-	-	-
ENSG00000021300	PLEKHB1	-	Y	-	-	-	-	-
ENSG00000088992	TESC	-	Y	Y	-	-	-	-
ENSG00000133328	HRASLS2	-	Y	-	-	-	-	-
ENSG00000181019	NQO1	-	Y	-	-	-	Y	-
ENSG00000087494	PTHLH	-	Y	-	-	-	-	-
ENSG00000188959	C9orf152	-	Y	-	-	-	-	-
ENSG00000165376	CLDN2	-	Y	-	-	-	-	-
ENSG00000163295	ALPI	-	Y	-	-	-	-	-
ENSG00000099769	IGFALS	-	Y	-	-	-	-	-
ENSG00000168065	SLC22A11	-	Y	-	-	-	-	-
ENSG00000162552	WNT4	-	Y	-	-	-	-	-
ENSG00000137392	CLPS	-	Y	-	-	-	-	-
ENSG00000122756	CNTFR	-	Y	-	-	-	-	-
ENSG00000101842	VSIG1	-	Y	Y	-	-	-	-
ENSG00000111700	SLCO1B3	-	Y	-	-	-	-	-
ENSG00000162391	FAM151A	-	Y	-	-	-	-	-
ENSG00000165478	HEPACAM	-	Y	-	-	-	-	-
ENSG00000219438	FAM19A5	-	Y	-	-	-	-	-
ENSG00000131142	CCL25	-	Y	-	-	-	-	-
ENSG00000140835	CHST4	-	Y	-	-	-	-	-
ENSG00000119888	EPCAM	-	Y	-	Y	-	-	-
ENSG00000169862	CTNND2	-	Y	-	-	-	-	-
ENSG00000086548	CEACAM6	-	Y	-	-	-	-	-
ENSG00000103546	SLC6A2	-	Y	Y	-	-	-	-
ENSG00000132164	SLC6A11	-	Y	-	-	-	-	-
ENSG00000168955	TM4SF20	-	Y	-	-	-	-	-
ENSG00000129654	FOXJ1	-	Y	-	-	-	-	-
ENSG00000140279	DUOX2	-	Y	-	-	-	-	-
ENSG00000112818	MEP1A	-	Y	-	-	-	-	-
ENSG00000273777	CEACAM20	-	Y	-	-	-	-	-
ENSG00000182798	MAGEB17	-	Y	-	-	-	-	-
ENSG00000120057	SFRP5	-	Y	Y	-	-	-	-
ENSG00000197273	GUCA2A	-	Y	-	-	-	-	-
ENSG00000104413	ESRP1	-	Y	-	-	-	-	-
ENSG00000137251	TINAG	-	Y	-	-	-	-	-
ENSG00000099812	MISP	-	Y	-	-	-	-	-
ENSG00000117148	ACTL8	-	Y	-	-	-	-	-
ENSG00000110375	UPK2	-	Y	-	-	-	-	-
ENSG00000143320	CRABP2	-	Y	-	-	-	-	-
ENSG00000126895	AVPR2	-	Y	Y	-	-	-	-
ENSG00000132746	ALDH3B2	-	Y	-	-	-	-	-
ENSG00000166828	SCNN1G	-	Y	-	-	-	-	-
ENSG00000109667	SLC2A9	-	Y	-	-	-	-	-
ENSG00000137463	MGARP	-	Y	-	-	-	-	-
ENSG00000137648	TMPRSS4	-	Y	-	-	-	-	-
ENSG00000147100	SLC16A2	-	Y	Y	-	-	-	-
ENSG00000131910	NR0B2	-	Y	-	-	-	-	-
ENSG00000166963	MAP1A	-	Y	-	-	-	-	-
ENSG00000010282	HHATL	-	Y	-	-	-	-	-
ENSG00000142102	ATHL1	-	Y	-	-	-	-	-
ENSG00000213190	MLLT11	-	Y	-	-	-	-	-
ENSG00000088882	CPXM1	-	Y	-	-	-	-	-
ENSG00000084731	KIF3C	-	Y	-	-	-	-	-
ENSG00000079112	CDH17	-	Y	-	-	-	-	-
ENSG00000105737	GRIK5	-	Y	-	-	-	-	-
ENSG00000132718	SYT11	-	Y	-	-	-	-	-
ENSG00000015413	DPEP1	-	Y	-	-	-	-	-
ENSG00000272636	DOC2B	-	Y	-	-	-	-	-
ENSG00000188488	SERPINA5	-	Y	-	-	-	-	-
ENSG00000170190	SLC16A5	-	Y	-	-	-	-	-
ENSG00000158966	CACHD1	-	Y	-	-	-	-	-
ENSG00000235098	ANKRD65	-	Y	-	-	-	-	-
ENSG00000162981	FAM84A	-	Y	-	-	-	-	-
ENSG00000136842	TMOD1	-	Y	-	-	-	-	-
ENSG00000151704	KCNJ1	-	Y	-	-	-	-	-
ENSG00000169129	AFAP1L2	-	Y	-	-	-	-	-
ENSG00000013588	GPRC5A	-	Y	-	-	-	-	-
ENSG00000154096	THY1	-	Y	-	-	-	-	-
ENSG00000139211	AMIGO2	-	Y	-	-	-	-	-
ENSG00000164056	SPRY1	-	Y	-	-	-	-	-
ENSG00000117394	SLC2A1	-	Y	-	-	-	-	-
ENSG00000205363	C15orf59	-	Y	-	-	-	-	-
ENSG00000074181	NOTCH3	-	Y	-	-	-	-	-
ENSG00000167183	PRR15L	-	Y	-	-	-	-	-
ENSG00000104549	SQLE	-	Y	-	-	-	-	-
ENSG00000120875	DUSP4	-	Y	-	-	-	Y	-
ENSG00000165868	HSPA12A	-	Y	-	-	-	-	-
ENSG00000115414	FN1	-	Y	-	-	-	-	-
ENSG00000101955	SRPX	-	Y	Y	-	-	-	-
ENSG00000156218	ADAMTSL3	-	Y	-	-	-	-	Y
ENSG00000100053	CRYBB3	-	Y	-	-	-	-	-
ENSG00000005073	HOXA11	-	Y	Y	-	-	-	-
ENSG00000115457	IGFBP2	-	Y	-	-	-	Y	-
ENSG00000116667	C1orf21	-	Y	-	-	-	-	-
ENSG00000206077	ZDHHC11B	-	Y	-	-	-	-	-
ENSG00000138061	CYP1B1	-	Y	-	-	-	-	-
ENSG00000050767	COL23A1	-	Y	Y	-	-	-	-
ENSG00000148942	SLC5A12	-	Y	-	-	-	-	-
ENSG00000165685	TMEM52B	-	Y	-	-	-	-	-
ENSG00000198535	C2CD4A	-	Y	-	-	-	-	-
ENSG00000169903	TM4SF4	-	Y	-	-	-	-	-
ENSG00000198829	SUCNR1	-	Y	-	-	-	-	-
ENSG00000178773	CPNE7	-	Y	-	-	-	-	-
ENSG00000164683	HEY1	-	Y	-	-	-	-	-
ENSG00000107485	GATA3	-	Y	-	-	-	Y	-
ENSG00000170044	ZPLD1	-	Y	-	-	-	-	-
ENSG00000115380	EFEMP1	-	Y	-	-	-	-	-
ENSG00000185442	FAM174B	-	Y	-	-	-	-	-
ENSG00000174885	NLRP6	-	Y	-	-	-	-	-
ENSG00000182472	CAPN12	-	Y	-	-	-	-	-
ENSG00000213901	SLC23A3	-	Y	-	-	-	-	-
ENSG00000159231	CBR3	-	Y	-	-	-	-	-
ENSG00000172824	CES4A	-	Y	-	Y	-	-	-
ENSG00000203867	RBM20	-	Y	Y	-	-	-	-
ENSG00000173110	HSPA6	-	Y	-	-	-	-	-
ENSG00000169894	MUC3A	-	Y	-	-	-	-	-
ENSG00000171747	LGALS4	-	Y	-	-	-	-	-
ENSG00000146700	SSC4D	-	Y	-	-	-	-	-
ENSG00000124466	LYPD3	-	Y	-	-	-	-	-
ENSG00000092068	SLC7A8	-	Y	-	-	-	-	-
ENSG00000253368	TRNP1	-	Y	-	-	-	-	-
ENSG00000077009	NMRK2	-	Y	-	-	-	-	-
ENSG00000128710	HOXD10	-	Y	-	-	-	-	-
ENSG00000141682	PMAIP1	-	Y	-	-	-	-	-
ENSG00000102359	SRPX2	-	Y	Y	-	-	-	-
ENSG00000186198	SLC51B	-	Y	-	-	-	-	-
ENSG00000009950	MLXIPL	-	Y	-	Y	-	-	-
ENSG00000108309	RUNDC3A	-	Y	-	-	-	-	-
ENSG00000147408	CSGALNACT1	-	Y	-	-	-	-	-
ENSG00000118094	TREH	-	Y	-	-	-	-	-
ENSG00000124253	PCK1	-	Y	-	-	-	-	-
ENSG00000186567	CEACAM19	-	Y	-	-	-	-	-
ENSG00000179593	ALOX15B	-	Y	-	-	-	-	-
ENSG00000077942	FBLN1	-	Y	-	-	-	-	-
ENSG00000175793	SFN	-	Y	-	-	-	-	-
ENSG00000118156	ZNF541	-	Y	-	-	-	-	-
ENSG00000143502	SUSD4	-	Y	-	-	-	-	-
ENSG00000168824	D4S234E	-	Y	-	-	-	-	-
ENSG00000154736	ADAMTS5	-	Y	-	-	-	-	-
ENSG00000175832	ETV4	-	Y	-	-	-	-	-
ENSG00000115648	MLPH	-	Y	-	-	-	-	-
ENSG00000189292	FAM150B	-	Y	-	-	-	-	-
ENSG00000101255	TRIB3	-	Y	-	-	-	-	-
ENSG00000204385	SLC44A4	-	Y	-	-	-	-	-
ENSG00000091986	CCDC80	-	Y	-	-	-	-	-
ENSG00000149927	DOC2A	-	Y	-	Y	-	-	-
ENSG00000157613	CREB3L1	-	Y	-	-	-	-	-
ENSG00000198734	F5	-	Y	-	-	-	-	-
ENSG00000107593	PKD2L1	-	Y	-	-	-	-	-
ENSG00000145362	ANK2	-	Y	-	-	-	-	-
ENSG00000174567	GOLT1A	-	Y	-	-	-	-	-
ENSG00000160282	FTCD	-	Y	-	-	-	-	-
ENSG00000164007	CLDN19	-	Y	-	-	-	-	-
ENSG00000141756	FKBP10	-	Y	-	-	-	-	-
ENSG00000116183	PAPPA2	-	Y	-	-	-	-	Y
ENSG00000085276	MECOM	-	Y	-	-	-	-	-
ENSG00000074803	SLC12A1	-	Y	-	-	-	-	-
ENSG00000115252	PDE1A	-	Y	-	-	-	-	-
ENSG00000131482	G6PC	-	Y	-	-	-	-	-
ENSG00000170837	GPR27	-	Y	-	-	-	-	-
ENSG00000166106	ADAMTS15	-	Y	-	-	-	-	-
ENSG00000188536	HBA2	-	Y	-	-	-	-	-
ENSG00000167676	PLIN4	-	Y	-	-	-	-	-
ENSG00000149527	PLCH2	-	Y	-	-	-	-	-
ENSG00000105366	SIGLEC8	-	Y	-	-	-	-	-
ENSG00000127129	EDN2	-	Y	-	-	-	-	-
ENSG00000259207	ITGB3	-	Y	-	-	-	-	-
ENSG00000009765	IYD	-	Y	-	-	-	-	-
ENSG00000159166	LAD1	-	Y	-	-	-	Y	-
ENSG00000214510	SPINK13	-	Y	-	-	-	-	-
ENSG00000257335	MGAM	-	Y	-	-	-	-	-
ENSG00000148702	HABP2	-	Y	-	-	-	-	-
ENSG00000039537	C6	-	Y	-	-	-	-	-
ENSG00000151572	ANO4	-	Y	-	-	-	-	Y
ENSG00000162460	TMEM82	-	Y	-	-	-	-	-
ENSG00000128918	ALDH1A2	-	Y	-	-	-	-	-
ENSG00000069206	ADAM7	-	Y	-	-	-	-	-
ENSG00000115602	IL1RL1	-	Y	-	-	-	-	-
ENSG00000136872	ALDOB	-	Y	-	-	-	-	-
ENSG00000101405	OXT	-	Y	-	-	-	-	-
ENSG00000049283	EPN3	-	Y	-	-	-	-	-
ENSG00000050628	PTGER3	-	Y	-	-	-	-	-
ENSG00000136155	SCEL	-	Y	-	-	-	-	-
ENSG00000181577	C6orf223	-	Y	-	-	-	-	-
ENSG00000133063	CHIT1	-	Y	Y	-	-	-	-
ENSG00000156886	ITGAD	-	Y	-	-	-	-	-
ENSG00000173267	SNCG	-	Y	-	-	-	-	-
ENSG00000261701	HPR	-	Y	-	-	-	-	-
ENSG00000196611	MMP1	-	Y	-	-	-	-	-
ENSG00000177494	ZBED2	-	Y	-	-	-	-	-
ENSG00000164363	SLC6A18	-	Y	-	-	-	-	-
ENSG00000131730	CKMT2	-	Y	-	-	-	-	-
ENSG00000170419	VSTM2A	-	Y	-	-	-	-	-
ENSG00000163586	FABP1	-	Y	-	-	-	-	-
ENSG00000178772	CPN2	-	Y	-	-	-	-	-
ENSG00000188729	OSTN	-	Y	-	-	-	-	-
ENSG00000172179	PRL	-	Y	-	-	-	-	-
ENSG00000174460	ZCCHC12	-	Y	Y	-	-	-	-
ENSG00000156687	UNC5D	-	Y	-	-	-	-	-
ENSG00000107165	TYRP1	-	Y	-	-	-	-	-
ENSG00000165917	RAPSN	-	Y	-	-	-	-	-
ENSG00000110148	CCKBR	-	Y	-	-	-	-	-
ENSG00000184613	NELL2	-	Y	-	-	-	-	-
ENSG00000113494	PRLR	-	Y	-	-	-	-	-
ENSG00000185664	PMEL	-	Y	-	-	-	-	-
ENSG00000066583	ISOC1	-	Y	-	-	-	-	-
ENSG00000102924	CBLN1	-	Y	-	-	-	-	-
ENSG00000101850	GPR143	-	Y	Y	-	-	-	-
ENSG00000176406	RIMS2	-	Y	-	-	-	-	Y
ENSG00000106031	HOXA13	-	Y	-	-	-	-	-
ENSG00000130598	TNNI2	-	Y	-	-	-	-	-
ENSG00000181072	CHRM2	-	Y	-	-	-	-	-
ENSG00000113749	HRH2	-	Y	-	-	-	-	-
ENSG00000134215	VAV3	-	Y	-	-	-	-	-
ENSG00000231672	DIRC3	-	Y	-	-	-	-	-
ENSG00000106004	HOXA5	-	Y	-	-	-	-	-
ENSG00000111049	MYF5	-	Y	-	-	-	-	-
ENSG00000111046	MYF6	-	Y	-	-	-	-	-
ENSG00000118194	TNNT2	-	Y	-	-	-	-	-
ENSG00000139874	SSTR1	-	Y	-	-	-	-	-
ENSG00000173894	CBX2	-	Y	Y	-	-	-	-
ENSG00000080709	KCNN2	-	Y	Y	-	-	-	-
ENSG00000138650	PCDH10	-	Y	-	-	-	-	-
ENSG00000112175	BMP5	-	Y	-	-	-	-	-
ENSG00000129910	CDH15	-	Y	Y	-	-	-	-
ENSG00000103154	NECAB2	-	Y	-	-	-	-	-
ENSG00000185482	STAC3	-	Y	-	-	-	-	-
ENSG00000182162	P2RY8	-	Y	-	-	-	-	-
ENSG00000109061	MYH1	-	Y	-	-	-	-	Y
ENSG00000196208	GREB1	-	Y	-	-	-	-	-
ENSG00000111012	CYP27B1	-	Y	-	-	-	-	-
ENSG00000180209	MYLPF	-	Y	-	-	-	-	-
ENSG00000111424	VDR	-	Y	Y	-	-	-	-
ENSG00000135643	KCNMB4	-	Y	-	-	-	-	-
ENSG00000005379	BZRAP1	-	Y	-	-	-	-	-
ENSG00000165349	SLC7A3	-	Y	Y	-	-	-	-
ENSG00000135678	CPM	-	Y	-	-	-	-	-
ENSG00000141314	RHBDL3	-	Y	-	-	-	-	-
ENSG00000077279	DCX	-	Y	Y	-	-	-	-
ENSG00000145808	ADAMTS19	-	Y	-	-	-	-	Y
ENSG00000129354	AP1M2	-	Y	-	-	-	-	-
ENSG00000064692	SNCAIP	-	Y	-	-	-	-	-
ENSG00000183091	NEB	-	Y	-	-	-	-	-
ENSG00000180044	C3orf80	-	Y	-	-	-	-	-
ENSG00000059915	PSD	-	Y	-	-	-	-	-
ENSG00000099994	SUSD2	-	Y	-	-	-	-	-
ENSG00000114854	TNNC1	-	Y	-	-	-	-	-
ENSG00000186340	THBS2	-	Y	-	-	-	-	-
ENSG00000183770	FOXL2	-	Y	-	-	-	-	-
ENSG00000125869	LAMP5	-	Y	Y	-	-	-	-
ENSG00000124205	EDN3	-	Y	Y	-	-	-	-
ENSG00000000005	TNMD	-	Y	Y	-	-	-	-
ENSG00000122861	PLAU	-	Y	-	-	-	-	-
ENSG00000135452	TSPAN31	-	Y	-	-	-	-	-
ENSG00000029534	ANK1	-	Y	-	-	-	-	-
ENSG00000181195	PENK	-	Y	-	-	-	-	-
ENSG00000128713	HOXD11	-	Y	-	-	-	-	-
ENSG00000092051	JPH4	-	Y	-	-	-	-	-
ENSG00000188322	SBK1	-	Y	-	-	-	-	-
ENSG00000170214	ADRA1B	-	Y	-	-	-	-	-
ENSG00000086967	MYBPC2	-	Y	-	-	-	-	-
ENSG00000080573	COL5A3	-	Y	Y	-	-	-	-
ENSG00000144218	AFF3	-	Y	-	-	-	-	-
ENSG00000130595	TNNT3	-	Y	-	-	-	-	-
ENSG00000149380	P4HA3	-	Y	-	-	-	-	-
ENSG00000104833	TUBB4A	-	Y	-	-	-	-	-
ENSG00000186462	NAP1L2	-	Y	Y	-	-	-	-
ENSG00000136943	CTSV	-	Y	-	-	-	-	-
ENSG00000158856	DMTN	-	Y	-	-	-	-	-
ENSG00000147655	RSPO2	-	Y	-	-	-	-	-
ENSG00000125965	GDF5	-	Y	-	-	-	-	-
ENSG00000078725	BRINP1	-	Y	Y	-	-	-	-
ENSG00000172020	GAP43	-	Y	-	-	-	-	-
ENSG00000170049	KCNAB3	-	Y	-	-	-	-	-
ENSG00000055732	MCOLN3	-	Y	-	-	-	-	-
ENSG00000101470	TNNC2	-	Y	-	-	-	-	-
ENSG00000177519	RPRM	-	Y	-	-	-	-	-
ENSG00000189129	PLAC9	-	Y	-	-	-	-	-
ENSG00000167476	JSRP1	-	Y	-	-	-	-	-
ENSG00000123427	METTL21B	-	Y	-	-	-	-	-
ENSG00000165449	SLC16A9	-	Y	-	-	-	-	-
ENSG00000127083	OMD	-	Y	-	-	-	-	-
ENSG00000165379	LRFN5	-	Y	-	-	-	-	-
ENSG00000135144	DTX1	-	Y	-	-	-	-	-
ENSG00000139044	B4GALNT3	-	Y	Y	-	-	-	-
ENSG00000132692	BCAN	-	Y	-	-	-	-	-
ENSG00000109255	NMU	-	Y	-	-	-	-	-
ENSG00000183186	C2CD4C	-	Y	-	-	-	-	-
ENSG00000037897	METTL1	-	Y	-	-	-	-	-
ENSG00000239474	KLHL41	-	Y	-	-	-	-	-
ENSG00000154760	SLFN13	-	Y	-	-	-	-	-
ENSG00000069011	PITX1	-	Y	-	-	-	-	-
ENSG00000170689	HOXB9	-	Y	-	-	-	-	-
ENSG00000153132	CLGN	-	Y	-	-	-	-	-
ENSG00000148935	GAS2	-	Y	-	-	-	-	-
ENSG00000102109	PCSK1N	-	Y	Y	-	-	-	-
ENSG00000181092	ADIPOQ	-	Y	-	-	-	-	-
ENSG00000099960	SLC7A4	-	Y	-	-	-	-	-
ENSG00000134917	ADAMTS8	-	Y	-	-	-	-	-
ENSG00000070031	SCT	-	Y	Y	-	-	-	-
ENSG00000147588	PMP2	-	Y	Y	-	-	-	-
ENSG00000170421	KRT8	-	Y	-	-	-	-	-
ENSG00000163888	CAMK2N2	-	Y	-	-	-	-	-
ENSG00000185739	SRL	-	Y	-	-	-	-	-
ENSG00000198756	COLGALT2	-	Y	-	-	-	-	-
ENSG00000170011	MYRIP	-	Y	-	-	-	-	-
ENSG00000172247	C1QTNF4	-	Y	-	-	-	-	-
ENSG00000161649	CD300LG	-	Y	-	-	-	-	-
ENSG00000154645	CHODL	-	Y	-	-	-	-	-
ENSG00000142494	SLC47A1	-	Y	-	-	-	-	-
ENSG00000076344	RGS11	-	Y	-	-	-	-	-
ENSG00000133110	POSTN	-	Y	-	-	-	-	-
ENSG00000118526	TCF21	-	Y	-	-	-	-	-
ENSG00000092009	CMA1	-	Y	-	-	-	-	-
ENSG00000149201	CCDC81	-	Y	-	-	-	-	-
ENSG00000154262	ABCA6	-	Y	-	-	-	-	-
ENSG00000107295	SH3GL2	-	Y	-	-	-	-	-
ENSG00000167779	IGFBP6	-	Y	-	-	-	-	-
ENSG00000172548	NIPAL4	-	Y	-	-	-	-	-
ENSG00000167414	GNG8	-	Y	-	-	-	-	-
ENSG00000176490	DIRAS1	-	Y	-	-	-	-	-
ENSG00000163331	DAPL1	-	Y	-	-	-	-	-
ENSG00000146013	GFRA3	-	Y	-	-	-	-	-
ENSG00000135679	MDM2	-	Y	-	-	-	-	-
ENSG00000089356	FXYD3	-	Y	-	-	-	-	-
ENSG00000258484	SPESP1	-	Y	-	-	-	-	-
ENSG00000157851	DPYSL5	-	Y	Y	-	-	-	-
ENSG00000141338	ABCA8	-	Y	-	-	-	-	-
ENSG00000122121	XPNPEP2	-	Y	Y	-	-	-	-
ENSG00000164107	HAND2	-	Y	Y	-	-	-	-
ENSG00000153495	TEX29	-	Y	-	-	-	-	-
ENSG00000138379	MSTN	-	Y	-	-	-	-	-
ENSG00000143768	LEFTY2	-	Y	-	-	-	-	-
ENSG00000211448	DIO2	-	Y	-	-	-	-	-
ENSG00000123496	IL13RA2	-	Y	-	-	-	-	-
ENSG00000163395	IGFN1	-	Y	-	-	-	-	-
ENSG00000154258	ABCA9	-	Y	-	-	-	-	-
ENSG00000095917	TPSD1	-	Y	-	Y	-	-	-
ENSG00000111432	FZD10	-	Y	Y	-	-	-	-
ENSG00000122824	NUDT10	-	Y	Y	-	-	-	-
ENSG00000052850	ALX4	-	Y	Y	-	-	-	-
ENSG00000120937	NPPB	-	Y	-	-	-	-	-
[truncated: 2,329 more rows]

## Sheet: Table 3
Cancer	Gene ID	Gene Symbol	CpG Site	Position	CpG Island	Region	Differential analysis result for each CpG site						Differential analysis result for each gene
							MaleTumor.ave	FemaleTumor.ave	wilcoxon.w	wilcoxon.p	p_adj	MaleTumor.ave-FemaleTumor.ave	baseMean	log2FoldChange	lfcSE	stat	pvalue	padj
BRCA	ENSG00000005513	SOX8	cg05520409	chr16:980619	CGI:chr16:979878-985327	promoter	0.48436	0.618734	-2.11041	0.0348233	0.0435216	-0.134374	255.217	-3.32514	0.672615	-4.9436	7.66943e-07	4.98318e-05
BRCA	ENSG00000184697	CLDN6	cg06036912	chr16:3018339	CGI:chr16:3017520-3018357	gene body,UTR,exon,promoter	0.391386	0.558899	-1.98015	0.0476863	0.0490657	-0.167513	45.7755	-3.06214	0.807899	-3.79025	0.000150495	0.00282167
BRCA	ENSG00000133392	MYH11	cg17880199	chr16:15856983	CGI:chr16:15856982-15857409	gene body,UTR,exon,promoter	0.0989154	0.293798	-3.17147	0.00151672	0.0118355	-0.194883	4258.65	-1.27943	0.478485	-2.67393	0.00749692	0.0473909
BRCA	ENSG00000140968	IRF8	cg26970841	chr16:85899060	CGI:chr16:85898515-85899336	gene body,UTR,exon,promoter	0.335821	0.548156	-2.49239	0.0126887	0.0291871	-0.212334	1175.3	-1.28613	0.342877	-3.75099	0.000176137	0.0031758
BRCA	ENSG00000140968	IRF8	cg03978375	chr16:85899062	CGI:chr16:85898515-85899336	gene body,UTR,exon,promoter	0.276401	0.474164	-2.45434	0.0141145	0.0304808	-0.197763	1175.3	-1.28613	0.342877	-3.75099	0.000176137	0.0031758
BRCA	ENSG00000140968	IRF8	cg24826867	chr16:85899247	CGI:chr16:85898515-85899336	gene body,promoter	0.233851	0.402781	-1.98162	0.0475221	0.0490113	-0.168929	1175.3	-1.28613	0.342877	-3.75099	0.000176137	0.0031758
BRCA	ENSG00000176692	FOXC2	cg04510512	chr16:86567914	CGI:chr16:86565749-86569043	gene body,CDS,exon,promoter	0.160585	0.421984	-2.73533	0.0062317	0.0222351	-0.2614	174.257	-2.06217	0.512168	-4.02635	5.66482e-05	0.00133008
BRCA	ENSG00000144857	BOC	cg16341592	chr3:113212335	CGI:chr3:113211590-113212659	gene body,UTR,exon,promoter	0.0613388	0.174337	-2.43824	0.0147591	0.0310586	-0.112998	1502.98	-1.61256	0.386224	-4.17519	2.97743e-05	0.000814713
BRCA	ENSG00000158258	CLSTN2	cg01755562	chr3:139934703	CGI:chr3:139934588-139936273	promoter	0.140739	0.0228966	3.47149	0.000517581	0.00619912	0.117842	12383.6	2.18353	0.570002	3.83075	0.000127755	0.00249206
BRCA	ENSG00000175040	CHST2	cg19442495	chr3:143119153	CGI:chr3:143119043-143121996	promoter	0.243448	0.452965	-2.68118	0.00733623	0.0237299	-0.209517	590.8	-1.29295	0.383403	-3.37231	0.000745403	0.00909137
BRCA	ENSG00000175040	CHST2	cg17815252	chr3:143119840	CGI:chr3:143119043-143121996	gene body,UTR,exon,promoter	0.16045	0.307381	-2.5641	0.0103443	0.0270117	-0.146931	590.8	-1.29295	0.383403	-3.37231	0.000745403	0.00909137
BRCA	ENSG00000175040	CHST2	cg08858437	chr3:143120096	CGI:chr3:143119043-143121996	gene body,UTR,exon,promoter	0.299449	0.489345	-2.29628	0.0216601	0.0360684	-0.189896	590.8	-1.29295	0.383403	-3.37231	0.000745403	0.00909137
BRCA	ENSG00000175040	CHST2	cg08774368	chr3:143120736	CGI:chr3:143119043-143121996	gene body,UTR,exon,promoter	0.33602	0.534667	-2.31823	0.0204369	0.0352497	-0.198647	590.8	-1.29295	0.383403	-3.37231	0.000745403	0.00909137
BRCA	ENSG00000078081	LAMP3	cg19825758	chr3:183162904	CGI:chr3:183162489-183162934	gene body,UTR,exon,promoter	0.329054	0.51503	-3.24757	0.00116395	0.0102873	-0.185976	887.954	-2.75296	0.515943	-5.33578	9.51333e-08	9.8828e-06
BRCA	ENSG00000078081	LAMP3	cg24615528	chr3:183162906	CGI:chr3:183162489-183162934	gene body,UTR,exon,promoter	0.230732	0.530834	-3.26659	0.00108849	0.00989453	-0.300102	887.954	-2.75296	0.515943	-5.33578	9.51333e-08	9.8828e-06
BRCA	ENSG00000176597	B3GNT5	cg20585088	chr3:183253139	CGI:chr3:183253185-183254847	promoter	0.0924481	0.227879	-2.19237	0.0283531	0.0400181	-0.135431	631.105	-2.37737	0.452656	-5.25205	1.50415e-07	1.38537e-05
BRCA	ENSG00000176597	B3GNT5	cg12930573	chr3:183253221	CGI:chr3:183253185-183254847	promoter	0.127759	0.326182	-3.21244	0.00131611	0.0109951	-0.198423	631.105	-2.37737	0.452656	-5.25205	1.50415e-07	1.38537e-05
BRCA	ENSG00000176597	B3GNT5	cg16579954	chr3:183253695	CGI:chr3:183253185-183254847	gene body,promoter	0.180773	0.440115	-3.58564	0.000336247	0.00453768	-0.259343	631.105	-2.37737	0.452656	-5.25205	1.50415e-07	1.38537e-05
BRCA	ENSG00000176597	B3GNT5	cg11102611	chr3:183253875	CGI:chr3:183253185-183254847	gene body,UTR,exon,promoter	0.11323	0.343774	-3.40856	0.000653074	0.00722025	-0.230545	631.105	-2.37737	0.452656	-5.25205	1.50415e-07	1.38537e-05
BRCA	ENSG00000176597	B3GNT5	cg02958321	chr3:183254260	CGI:chr3:183253185-183254847	gene body,promoter	0.185786	0.410528	-3.26806	0.00108288	0.00986896	-0.224742	631.105	-2.37737	0.452656	-5.25205	1.50415e-07	1.38537e-05
BRCA	ENSG00000171608	PIK3CD	cg18976437	chr1:9652518	CGI:chr1:9651674-9652943	gene body,promoter	0.152649	0.382383	-2.77631	0.00549793	0.0211833	-0.229733	1133.08	-1.12247	0.297562	-3.77222	0.000161798	0.00298043
BRCA	ENSG00000162551	ALPL	cg22154616	chr1:21509210	CGI:chr1:21509055-21509851	promoter	0.0538867	0.162409	-2.6724	0.00753103	0.0239927	-0.108523	1310.19	-1.58334	0.435036	-3.63955	0.000273115	0.00447298
BRCA	ENSG00000162551	ALPL	cg18236421	chr1:21509640	CGI:chr1:21509055-21509851	gene body,promoter	0.303338	0.484802	-1.9743	0.0483477	0.0493077	-0.181464	1310.19	-1.58334	0.435036	-3.63955	0.000273115	0.00447298
BRCA	ENSG00000142910	TINAGL1	cg18107144	chr1:31576556	CGI:chr1:31586870-31587170	gene body,UTR,exon,promoter	0.300711	0.492872	-2.27725	0.0227713	0.0367466	-0.19216	2344.02	-1.22483	0.366274	-3.34402	0.000825732	0.00981649
BRCA	ENSG00000116985	BMP8B	cg18108008	chr1:39788857	CGI:chr1:39788011-39789500	gene body,UTR,exon,promoter	0.0427991	0.193945	-2.03869	0.0414805	0.046593	-0.151146	530.169	1.06399	0.384275	2.76881	0.00562611	0.0389792
BRCA	ENSG00000116985	BMP8B	cg13458335	chr1:39789187	CGI:chr1:39788011-39789500	promoter	0.0523995	0.231635	-2.44848	0.0143459	0.0306936	-0.179236	530.169	1.06399	0.384275	2.76881	0.00562611	0.0389792
BRCA	ENSG00000049089	COL9A2	cg16989117	chr1:40316235	CGI:chr1:40316007-40316284	gene body,promoter	0.384052	0.544868	-2.14114	0.0322626	0.0422142	-0.160816	1814	-1.40517	0.448458	-3.13335	0.00172826	0.016847
BRCA	ENSG00000203782	LOR	cg08611411	chr1:153261561	CGI:chr1:153260996-153261837	gene body,CDS,exon,promoter	0.0920144	0.323104	-2.48068	0.0131132	0.0295913	-0.231089	4.05981	-3.44384	1.08605	-3.17099	0.00151923	0.0153278
BRCA	ENSG00000198771	RCSD1	cg18800085	chr1:167630482	CGI:chr1:167630235-167630602	gene body,promoter	0.277846	0.492816	-2.21139	0.0270088	0.0392395	-0.21497	1097.48	-1.12804	0.319128	-3.53476	0.000408142	0.0059098
BRCA	ENSG00000081277	PKP1	cg27571196	chr1:201284131	CGI:chr1:201283324-201284520	gene body,promoter	0.651548	0.792895	-2.99584	0.00273688	0.0157981	-0.141347	2746.23	-1.88062	0.65776	-2.85913	0.00424805	0.0317192
BRCA	ENSG00000203685	C1orf95	cg03745431	chr1:226549012	CGI:chr1:226548679-226549711	gene body,CDS,exon,promoter	0.0770736	0.284521	-2.2714	0.023123	0.0369615	-0.207447	541.12	-2.65192	0.648252	-4.09088	4.29744e-05	0.00106648
BRCA	ENSG00000143632	ACTA1	cg04900080	chr1:229434918	CGI:chr1:229431459-229434937	promoter	0.311445	0.435352	-2.04894	0.040468	0.0461814	-0.123906	241.774	-2.6985	0.636196	-4.24161	2.21917e-05	0.000661973
BRCA	ENSG00000168243	GNG4	cg11696475	chr1:235649972	CGI:chr1:235648541-235650766	gene body,UTR,exon,promoter	0.0854459	0.215793	-2.86412	0.00418163	0.0188879	-0.130347	605.664	-1.80024	0.679849	-2.64799	0.00809707	0.0498033
BRCA	ENSG00000104332	SFRP1	cg24319902	chr8:41309471	CGI:chr8:41308333-41309621	gene body,UTR,exon,promoter	0.307861	0.514643	-2.68704	0.00720888	0.02355	-0.206782	10421.1	-3.77029	0.669212	-5.63393	1.76153e-08	2.71336e-06
BRCA	ENSG00000104332	SFRP1	cg01495122	chr8:41309568	CGI:chr8:41308333-41309621	promoter	0.274086	0.502486	-2.68411	0.0072723	0.023643	-0.2284	10421.1	-3.77029	0.669212	-5.63393	1.76153e-08	2.71336e-06
BRCA	ENSG00000104332	SFRP1	cg17816908	chr8:41309590	CGI:chr8:41308333-41309621	promoter	0.262187	0.47262	-2.34896	0.0188258	0.0341719	-0.210433	10421.1	-3.77029	0.669212	-5.63393	1.76153e-08	2.71336e-06
BRCA	ENSG00000104321	TRPA1	cg12668482	chr8:72075527	CGI:chr8:72075245-72075788	gene body,UTR,exon,promoter	0.172706	0.395831	-2.55971	0.0104759	0.0271478	-0.223125	328.332	-2.50773	0.747001	-3.35706	0.000787763	0.00945316
BRCA	ENSG00000104321	TRPA1	cg14703605	chr8:72075681	CGI:chr8:72075245-72075788	promoter	0.106661	0.267694	-2.41336	0.0158063	0.0319099	-0.161033	328.332	-2.50773	0.747001	-3.35706	0.000787763	0.00945316
BRCA	ENSG00000104321	TRPA1	cg27528660	chr8:72075689	CGI:chr8:72075245-72075788	promoter	0.133759	0.315484	-2.37823	0.0173958	0.0331287	-0.181724	328.332	-2.50773	0.747001	-3.35706	0.000787763	0.00945316
BRCA	ENSG00000171033	PKIA	cg04014062	chr8:78516490	CGI:chr8:78516198-78516519	gene body,promoter	0.238202	0.458774	-2.18505	0.0288854	0.0403509	-0.220571	472.687	-2.19075	0.528533	-4.14496	3.39875e-05	0.000897029
BRCA	ENSG00000131773	KHDRBS3	cg27186774	chr8:135457342	CGI:chr8:135456696-135457308	promoter	0.0218765	0.136792	-2.24652	0.024671	0.0378774	-0.114915	847.846	-1.26453	0.374969	-3.37235	0.000745304	0.00909137
BRCA	ENSG00000198576	ARC	cg01509843	chr8:142614461	CGI:chr8:142613069-142614805	gene body,UTR,exon,promoter	0.0262987	0.217785	-2.31237	0.0207571	0.0354866	-0.191486	179.995	-2.90241	0.622428	-4.66304	3.11565e-06	0.000150869
BRCA	ENSG00000198576	ARC	cg04321580	chr8:142614772	CGI:chr8:142613069-142614805	promoter	0.028283	0.151183	-2.61972	0.00880032	0.0254407	-0.1229	179.995	-2.90241	0.622428	-4.66304	3.11565e-06	0.000150869
BRCA	ENSG00000160886	LY6K	cg19413366	chr8:142700567	CGI:chr8:142700163-142700806	gene body,CDS,exon,promoter	0.521259	0.643924	-2.4236	0.0153674	0.0315585	-0.122664	347.003	-4.34412	0.672262	-6.46195	1.0336e-10	4.50449e-08
BRCA	ENSG00000139970	RTN1	cg06820586	chr14:59870295	CGI:chr14:59870233-59870807	gene body,promoter	0.0413558	0.144334	-2.46312	0.0137735	0.0301951	-0.102978	1226.04	-1.6368	0.467299	-3.50268	0.000460605	0.00639743
BRCA	ENSG00000100767	PAPLN	cg26147351	chr14:73237635	CGI:chr14:73237346-73238398	gene body,promoter	0.0504722	0.164697	-2.15578	0.0311011	0.0416081	-0.114225	880.478	-1.24883	0.311868	-4.00435	6.21874e-05	0.00143007
BRCA	ENSG00000137872	SEMA6D	cg22389950	chr15:47184173	CGI:chr15:47184172-47185302	gene body,UTR,exon,promoter	0.163835	0.291344	-2.68704	0.00720888	0.02355	-0.127509	579.069	-1.4276	0.450913	-3.16602	0.00154541	0.0154977
BRCA	ENSG00000140368	PSTPIP1	cg06613515	chr15:76995315	CGI:chr15:77027809-77028115	gene body,UTR,exon,promoter	0.602804	0.722152	-2.51434	0.0119255	0.0285105	-0.119348	323.275	-1.04621	0.386642	-2.70589	0.00681224	0.0442783
BRCA	ENSG00000140511	HAPLN3	cg04829853	chr15:88894977	CGI:chr15:88894945-88895619	gene body,promoter	0.105242	0.246818	-2.37677	0.017465	0.0331802	-0.141576	1702.42	-1.97757	0.459019	-4.30826	1.64547e-05	0.000519456
BRCA	ENSG00000182175	RGMA	cg22242764	chr15:93088394	CGI:chr15:93088199-93089944	gene body,UTR,exon,promoter	0.0923672	0.261741	-2.64167	0.00824988	0.0248111	-0.169374	1080.69	-2.10665	0.478808	-4.39979	1.08357e-05	0.000387226
BRCA	ENSG00000182175	RGMA	cg20899253	chr15:93089390	CGI:chr15:93088199-93089944	promoter	0.0528394	0.271831	-2.29189	0.0219123	0.0362378	-0.218992	1080.69	-2.10665	0.478808	-4.39979	1.08357e-05	0.000387226
BRCA	ENSG00000106829	TLE4	cg13885343	chr9:79572755	CGI:chr9:79570564-79573645	gene body,UTR,exon,promoter	0.0583088	0.167243	-2.50995	0.0120748	0.0286466	-0.108935	793.664	-1.49098	0.283018	-5.26816	1.37798e-07	1.29588e-05
BRCA	ENSG00000106829	TLE4	cg14241138	chr9:79573478	CGI:chr9:79570564-79573645	gene body,promoter	0.0790754	0.220481	-2.41043	0.0159337	0.0320156	-0.141406	793.664	-1.49098	0.283018	-5.26816	1.37798e-07	1.29588e-05
BRCA	ENSG00000196730	DAPK1	cg15746719	chr9:87498898	CGI:chr9:87497599-87498902	gene body,promoter	0.374647	0.602016	-2.70167	0.00689916	0.0231212	-0.227369	1699.94	-1.12736	0.331029	-3.40563	0.000660107	0.00835917
BRCA	ENSG00000119514	GALNT12	cg01725199	chr9:98807708	CGI:chr9:98807620-98808067	gene body,CDS,exon,promoter	0.101132	0.346647	-3.62223	0.000292072	0.00407707	-0.245515	198.809	-1.43792	0.422803	-3.40092	0.000671588	0.00846855
BRCA	ENSG00000167772	ANGPTL4	cg06620911	chr19:8364150	CGI:chr19:8364081-8364608	gene body,promoter	0.0584708	0.181386	-2.20115	0.0277257	0.0396548	-0.122915	1144.18	-1.50526	0.491624	-3.06181	0.0022	0.019944
BRCA	ENSG00000171954	CYP4F22	cg04738224	chr19:15508150	CGI:chr19:15471794-15472094	promoter	0.479528	0.659957	-2.77778	0.00547323	0.021149	-0.180429	689.876	-1.84364	0.692681	-2.6616	0.00777699	0.0486723
BRCA	ENSG00000160111	CPAMD8	cg22800025	chr19:17026894	CGI:chr19:17026495-17027272	promoter	0.0794005	0.204017	-3.00316	0.00267192	0.0156265	-0.124617	800.975	-1.78642	0.457199	-3.90732	9.33245e-05	0.00195073
BRCA	ENSG00000256229	ZNF486	cg02427230	chr19:20167204	CGI:chr19:20051963-20052298	promoter	0.210853	0.0697466	2.55825	0.0105201	0.0271803	0.141107	1219.85	2.47881	0.42119	5.88527	3.97409e-09	7.92729e-07
BRCA	ENSG00000256229	ZNF486	cg15748470	chr19:20167206	CGI:chr19:20051963-20052298	promoter	0.196482	0.0574193	2.52312	0.0116318	0.0282818	0.139063	1219.85	2.47881	0.42119	5.88527	3.97409e-09	7.92729e-07
BRCA	ENSG00000256229	ZNF486	cg03570035	chr19:20167242	CGI:chr19:20051963-20052298	gene body,UTR,exon,promoter	0.219106	0.0587197	2.84217	0.00448074	0.019477	0.160386	1219.85	2.47881	0.42119	5.88527	3.97409e-09	7.92729e-07
BRCA	ENSG00000167614	TTYH1	cg02623991	chr19:54415257	CGI:chr19:54415229-54415654	gene body,CDS,exon,promoter	0.386095	0.62262	-2.58605	0.00970816	0.0263607	-0.236524	701.269	-3.58232	0.69785	-5.13337	2.84605e-07	2.31151e-05
BRCA	ENSG00000167614	TTYH1	cg21883754	chr19:54415263	CGI:chr19:54415229-54415654	gene body,CDS,exon,promoter	0.214449	0.432233	-2.73094	0.00631533	0.0223289	-0.217784	701.269	-3.58232	0.69785	-5.13337	2.84605e-07	2.31151e-05
BRCA	ENSG00000196263	ZNF471	cg14289985	chr19:56507479	CGI:chr19:56507374-56508137	promoter	0.145222	0.383512	-2.82461	0.00473383	0.0199016	-0.238291	470.573	-1.28591	0.357195	-3.60002	0.000318195	0.0049827
BRCA	ENSG00000196263	ZNF471	cg14277392	chr19:56507564	CGI:chr19:56507374-56508137	promoter	0.122578	0.316191	-3.31343	0.000921599	0.00898864	-0.193613	470.573	-1.28591	0.357195	-3.60002	0.000318195	0.0049827
BRCA	ENSG00000196263	ZNF471	cg14042851	chr19:56507636	CGI:chr19:56507374-56508137	promoter	0.151808	0.340682	-2.60801	0.0091071	0.0257431	-0.188874	470.573	-1.28591	0.357195	-3.60002	0.000318195	0.0049827
BRCA	ENSG00000196263	ZNF471	cg11539780	chr19:56507647	CGI:chr19:56507374-56508137	promoter	0.179267	0.424972	-2.9534	0.00314295	0.0167891	-0.245704	470.573	-1.28591	0.357195	-3.60002	0.000318195	0.0049827
BRCA	ENSG00000196263	ZNF471	cg19811761	chr19:56507653	CGI:chr19:56507374-56508137	promoter	0.216056	0.488139	-3.21244	0.00131611	0.0109951	-0.272082	470.573	-1.28591	0.357195	-3.60002	0.000318195	0.0049827
BRCA	ENSG00000137265	IRF4	cg06392169	chr6:391936	CGI:chr6:391188-393802	gene body,promoter	0.443126	0.638971	-2.54947	0.0107888	0.0274614	-0.195845	428.89	-2.6852	0.514733	-5.21669	1.82152e-07	1.61925e-05
BRCA	ENSG00000079689	SCGN	cg10721149	chr6:25652177	CGI:chr6:25652230-25652481	promoter	0.329552	0.549447	-2.8129	0.00490967	0.0201811	-0.219895	89.2565	-3.38436	0.871962	-3.88132	0.000103891	0.00213246
BRCA	ENSG00000079689	SCGN	cg13834623	chr6:25652179	CGI:chr6:25652230-25652481	promoter	0.239801	0.446685	-2.71777	0.00657231	0.0226994	-0.206884	89.2565	-3.38436	0.871962	-3.88132	0.000103891	0.00213246
BRCA	ENSG00000164626	KCNK5	cg03963929	chr6:39229650	CGI:chr6:39229041-39229741	promoter	0.0357309	0.188872	-2.06504	0.0389194	0.0454653	-0.153141	1079.88	-2.64392	0.556012	-4.75515	1.983e-06	0.000104829
BRCA	ENSG00000008196	TFAP2B	cg24366557	chr6:50819937	CGI:chr6:50819573-50820378	gene body,promoter	0.242013	0.399642	-1.9743	0.0483477	0.0493077	-0.157629	4208.33	-2.83449	0.748445	-3.78717	0.000152373	0.00284791
BRCA	ENSG00000131015	ULBP2	cg18082080	chr6:149941934	CGI:chr6:149941567-149942541	promoter	0.0366416	0.173541	-2.16309	0.0305339	0.0412722	-0.136899	85.2674	-1.64273	0.482313	-3.40594	0.000659377	0.00835758
BRCA	ENSG00000198729	PPP1R14C	cg20283582	chr6:150142864	CGI:chr6:150142635-150143866	promoter	0.183405	0.42422	-2.61825	0.00883815	0.0254753	-0.240816	598.357	-4.19688	0.712568	-5.8898	3.86668e-09	7.87944e-07
BRCA	ENSG00000198729	PPP1R14C	cg09608387	chr6:150142884	CGI:chr6:150142635-150143866	promoter	0.167188	0.416981	-2.62264	0.00872508	0.0253688	-0.249792	598.357	-4.19688	0.712568	-5.8898	3.86668e-09	7.87944e-07
BRCA	ENSG00000198729	PPP1R14C	cg26349375	chr6:150142988	CGI:chr6:150142635-150143866	promoter	0.0786681	0.289849	-2.92998	0.0033898	0.017416	-0.211181	598.357	-4.19688	0.712568	-5.8898	3.86668e-09	7.87944e-07
BRCA	ENSG00000139352	ASCL1	cg16712637	chr12:102958222	CGI:chr12:102957360-102958917	gene body,UTR,exon,promoter	0.157802	0.322452	-2.14407	0.0320274	0.0421047	-0.16465	220.07	-5.02808	1.12143	-4.48362	7.33875e-06	0.000288195
BRCA	ENSG00000111344	RASAL1	cg03540165	chr12:113135417	CGI:chr12:113135172-113135953	gene body,CDS,exon,promoter	0.0620567	0.218541	-2.44556	0.0144629	0.0308032	-0.156484	328.766	-3.0708	0.579309	-5.30081	1.15292e-07	1.14446e-05
BRCA	ENSG00000171303	KCNK3	cg18327056	chr2:26692487	CGI:chr2:26692577-26693683	promoter	0.349744	0.576441	-2.71924	0.0065433	0.0226565	-0.226697	368.513	-2.85236	0.664034	-4.29551	1.74293e-05	0.000545407
BRCA	ENSG00000119866	BCL11A	cg26632873	chr2:60554505	CGI:chr2:60553775-60555149	promoter	0.0467468	0.188297	-2.36067	0.0182419	0.0337655	-0.14155	573.374	-4.30913	0.62593	-6.88437	5.80438e-12	4.50925e-09
BRCA	ENSG00000172005	MAL	cg06668300	chr2:95026010	CGI:chr2:95025112-95026686	gene body,promoter	0.117546	0.249119	-2.22603	0.0260124	0.0386874	-0.131573	80.9308	-2.41359	0.556791	-4.33483	1.45875e-05	0.000476246
BRCA	ENSG00000163064	EN1	cg20359285	chr2:118846393	CGI:chr2:118845040-118848010	gene body,CDS,exon,promoter	0.124485	0.252929	-2.0065	0.0448032	0.0479597	-0.128444	943.29	-3.2112	0.693179	-4.63257	3.61154e-06	0.000167179
BRCA	ENSG00000163064	EN1	cg12231969	chr2:118847677	CGI:chr2:118845040-118848010	gene body,UTR,exon,promoter	0.349058	0.518618	-2.36653	0.017956	0.0335533	-0.16956	943.29	-3.2112	0.693179	-4.63257	3.61154e-06	0.000167179
BRCA	ENSG00000163064	EN1	cg14274989	chr2:118848726	CGI:chr2:118848462-118848737	promoter	0.228762	0.460417	-3.59589	0.000323286	0.00440179	-0.231655	943.29	-3.2112	0.693179	-4.63257	3.61154e-06	0.000167179
BRCA	ENSG00000115844	DLX2	cg22061628	chr2:172101452	CGI:chr2:172100034-172103129	gene body,CDS,exon,promoter	0.436404	0.552369	-2.07821	0.03769	0.0448626	-0.115964	203.25	-3.27629	0.788742	-4.15381	3.26978e-05	0.000872008
BRCA	ENSG00000175084	DES	cg18182399	chr2:219418453	CGI:chr2:219418478-219419028	gene body,UTR,exon,promoter	0.35858	0.521103	-2.0665	0.0387811	0.0454116	-0.162523	198.574	-3.17423	0.649471	-4.88741	1.02172e-06	6.20156e-05
BRCA	ENSG00000175084	DES	cg24927800	chr2:219418492	CGI:chr2:219418478-219419028	gene body,CDS,exon,promoter	0.418246	0.56665	-1.97869	0.0478509	0.0491265	-0.148404	198.574	-3.17423	0.649471	-4.88741	1.02172e-06	6.20156e-05
BRCA	ENSG00000171551	ECEL1	cg19047707	chr2:232486815	CGI:chr2:232485568-232488264	gene body,promoter	0.411334	0.58515	-2.2714	0.023123	0.0369615	-0.173816	98.2781	-2.69503	0.553964	-4.865	1.14459e-06	6.77496e-05
BRCA	ENSG00000130294	KIF1A	cg16002507	chr2:240819997	CGI:chr2:240818724-240821366	gene body,promoter	0.055743	0.234005	-3.75249	0.000175089	0.00269767	-0.178262	1095.14	-5.91056	0.854211	-6.91933	4.53801e-12	4.05425e-09
BRCA	ENSG00000130294	KIF1A	cg21321735	chr2:240820747	CGI:chr2:240818724-240821366	promoter	0.0927216	0.313471	-2.86998	0.00410499	0.0187785	-0.220749	1095.14	-5.91056	0.854211	-6.91933	4.53801e-12	4.05425e-09
BRCA	ENSG00000007062	PROM1	cg21647189	chr4:16084191	CGI:chr4:16082572-16084112	gene body,UTR,exon,promoter	0.395756	0.622467	-3.31196	0.000926434	0.00900825	-0.226712	4582.25	-3.51776	0.69263	-5.07884	3.79746e-07	2.91215e-05
BRCA	ENSG00000145284	SCD5	cg10724771	chr4:82798949	CGI:chr4:82797856-82799088	promoter	0.0229262	0.123615	-2.34457	0.0190489	0.0342981	-0.100689	1123.13	-1.0493	0.394752	-2.65813	0.00785747	0.0488849
BRCA	ENSG00000117983	MUC5B	cg20911165	chr11:1223167	CGI:chr11:1226600-1226910	gene body,CDS,exon,promoter	0.520332	0.777105	-3.39392	0.000688994	0.00746941	-0.256774	5792.69	-4.34524	0.736326	-5.90124	3.60786e-09	7.49595e-07
BRCA	ENSG00000184937	WT1	cg14657517	chr11:32435364	CGI:chr11:32433328-32435765	gene body,UTR,exon,promoter	0.19797	0.417108	-2.58605	0.00970816	0.0263607	-0.219138	333.905	-4.66123	0.751537	-6.20226	5.5659e-10	1.69511e-07
BRCA	ENSG00000166016	ABTB2	cg03831465	chr11:34357250	CGI:chr11:34356682-34358176	gene body,CDS,exon,promoter	0.0587892	0.188746	-1.97869	0.0478509	0.0491265	-0.129957	675.333	-1.08347	0.390557	-2.77416	0.00553446	0.0385085
BRCA	ENSG00000166016	ABTB2	cg00508498	chr11:34357258	CGI:chr11:34356682-34358176	gene body,CDS,exon,promoter	0.0917992	0.249099	-2.80119	0.00509141	0.020525	-0.1573	675.333	-1.08347	0.390557	-2.77416	0.00553446	0.0385085
BRCA	ENSG00000168539	CHRM1	cg13273340	chr11:62923245	CGI:chr11:62923502-62924016	promoter	0.491861	0.656841	-2.58166	0.00983254	0.0265072	-0.16498	236.797	-3.47248	0.646549	-5.37079	7.8394e-08	8.43822e-06
BRCA	ENSG00000084207	GSTP1	cg04920951	chr11:67583800	CGI:chr11:67583457-67584482	gene body,UTR,exon,promoter	0.172008	0.362103	-2.61386	0.00895254	0.0256077	-0.190095	11467.3	-1.93975	0.417204	-4.64941	3.32882e-06	0.00015777
BRCA	ENSG00000084207	GSTP1	cg26250609	chr11:67583802	CGI:chr11:67583457-67584482	gene body,UTR,exon,promoter	0.335951	0.570891	-2.72802	0.00637164	0.0224073	-0.23494	11467.3	-1.93975	0.417204	-4.64941	3.32882e-06	0.00015777
BRCA	ENSG00000088836	SLC4A11	cg21304453	chr20:3238148	CGI:chr20:3237932-3240284	gene body,UTR,exon,promoter	0.527452	0.69272	-2.63874	0.00832145	0.0248967	-0.165267	589.045	-1.33397	0.464328	-2.87291	0.00406709	0.0307406
BRCA	ENSG00000101230	ISM1	cg22588144	chr20:13220282	CGI:chr20:13220023-13221969	promoter	0.284724	0.446148	-2.23627	0.025334	0.0382811	-0.161424	638.311	-1.21535	0.375001	-3.24094	0.00119138	0.0129094
BRCA	ENSG00000101230	ISM1	cg04432319	chr20:13220284	CGI:chr20:13220023-13221969	promoter	0.282442	0.447677	-2.24213	0.0249533	0.0380457	-0.165234	638.311	-1.21535	0.375001	-3.24094	0.00119138	0.0129094
BRCA	ENSG00000124143	ARHGAP40	cg00557360	chr20:38601743	CGI:chr20:38601880-38602099	promoter	0.305779	0.546223	-2.66362	0.00773045	0.0242338	-0.240443	793.787	-2.94856	0.785039	-3.75594	0.00017269	0.00313227
BRCA	ENSG00000124143	ARHGAP40	cg04608177	chr20:38601746	CGI:chr20:38601880-38602099	promoter	0.31239	0.538049	-2.68265	0.0073042	0.0236904	-0.22566	793.787	-2.94856	0.785039	-3.75594	0.00017269	0.00313227
BRCA	ENSG00000124143	ARHGAP40	cg13523649	chr20:38602098	CGI:chr20:38601880-38602099	gene body,promoter	0.358503	0.5839	-2.73094	0.00631533	0.0223289	-0.225397	793.787	-2.94856	0.785039	-3.75594	0.00017269	0.00313227
BRCA	ENSG00000101445	PPP1R16B	cg26680502	chr20:38805122	CGI:chr20:38805563-38806949	promoter	0.673247	0.780858	-2.83339	0.00460571	0.0196981	-0.107611	696.466	-1.24823	0.381996	-3.26766	0.00108439	0.0120272
BRCA	ENSG00000101445	PPP1R16B	cg06207052	chr20:38805588	CGI:chr20:38805563-38806949	promoter	0.392699	0.560132	-2.16749	0.0301979	0.0410858	-0.167433	696.466	-1.24823	0.381996	-3.26766	0.00108439	0.0120272
BRCA	ENSG00000101445	PPP1R16B	cg25433624	chr20:38806476	CGI:chr20:38805563-38806949	gene body,promoter	0.140169	0.356411	-2.85242	0.00433882	0.0192029	-0.216241	696.466	-1.24823	0.381996	-3.26766	0.00108439	0.0120272
BRCA	ENSG00000101134	DOK5	cg23359394	chr20:54475501	CGI:chr20:54475194-54476454	promoter	0.261478	0.492719	-2.52166	0.0116803	0.0283103	-0.231241	212.759	-1.39863	0.393713	-3.55242	0.000381709	0.00563202
BRCA	ENSG00000101134	DOK5	cg20107395	chr20:54475795	CGI:chr20:54475194-54476454	gene body,UTR,exon,promoter	0.280097	0.475281	-1.96405	0.0495237	0.0497272	-0.195184	212.759	-1.39863	0.393713	-3.55242	0.000381709	0.00563202
BRCA	ENSG00000178372	CALML5	cg16048771	chr10:5499183	CGI:chr10:5498822-5499552	gene body,CDS,exon,promoter	0.808081	0.915155	-1.98015	0.0476863	0.0490657	-0.107074	5004.56	-5.40653	0.845999	-6.3907	1.6513e-10	6.41422e-08
BRCA	ENSG00000178363	CALML3	cg17283169	chr10:5525561	CGI:chr10:5525159-5525865	gene body,UTR,exon,promoter	0.828894	0.944683	-3.2183	0.00128954	0.0109037	-0.115789	621.252	-4.83319	0.761155	-6.34981	2.15584e-10	8.02511e-08
BRCA	ENSG00000198879	SFMBT2	cg03031609	chr10:7411909	CGI:chr10:7407414-7413250	promoter	0.171456	0.315419	-2.50556	0.0122258	0.0287825	-0.143963	1356.02	-1.09423	0.295566	-3.70215	0.000213781	0.00370499
BRCA	ENSG00000148468	FAM171A1	cg03120475	chr10:15369914	CGI:chr10:15370420-15371463	gene body,promoter	0.5223	0.641956	-2.2231	0.0262091	0.0388041	-0.119656	1528.4	-1.49	0.413834	-3.60047	0.000317641	0.0049786
BRCA	ENSG00000077327	SPAG6	cg26492368	chr10:22345804	CGI:chr10:22345071-22345933	gene body,CDS,exon,promoter	0.594922	0.722375	-2.12651	0.0334611	0.0428335	-0.127453	385.268	-3.30199	0.899901	-3.66928	0.000243231	0.00410392
BRCA	ENSG00000107984	DKK1	cg09465786	chr10:52314983	CGI:chr10:52314229-52315067	gene body,CDS,exon,promoter	0.253397	0.47348	-2.60215	0.00926405	0.0259263	-0.220083	407.383	-4.30814	0.742461	-5.80251	6.53286e-09	1.19111e-06
BRCA	ENSG00000107984	DKK1	cg08812555	chr10:52315028	CGI:chr10:52314229-52315067	gene body,CDS,exon,promoter	0.317133	0.492136	-1.96259	0.0496937	0.0497933	-0.175003	407.383	-4.30814	0.742461	-5.80251	6.53286e-09	1.19111e-06
BRCA	ENSG00000099284	H2AFY2	cg13626863	chr10:70054156	CGI:chr10:70052562-70053937	gene body,promoter	0.303684	0.469611	-2.28603	0.0222524	0.0364512	-0.165927	1731.76	-1.42454	0.373697	-3.81203	0.000137831	0.00262835
BRCA	ENSG00000107742	SPOCK2	cg00661320	chr10:72089067	CGI:chr10:72087048-72088475	promoter	0.585953	0.716557	-2.45434	0.0141145	0.0304808	-0.130605	1998.42	-1.52552	0.409506	-3.72526	0.00019511	0.00344215
BRCA	ENSG00000095713	CRTAC1	cg04105282	chr10:98030413	CGI:chr10:98029857-98031391	gene body,promoter	0.170384	0.369431	-2.41482	0.0157429	0.0318617	-0.199047	173.898	-3.5545	0.596196	-5.96197	2.49216e-09	5.78311e-07
BRCA	ENSG00000095713	CRTAC1	cg08969532	chr10:98030681	CGI:chr10:98029857-98031391	gene body,UTR,exon,promoter	0.185222	0.391183	-2.03869	0.0414805	0.046593	-0.20596	173.898	-3.5545	0.596196	-5.96197	2.49216e-09	5.78311e-07
BRCA	ENSG00000095713	CRTAC1	cg11302943	chr10:98030839	CGI:chr10:98029857-98031391	promoter	0.225758	0.365701	-1.99186	0.0463862	0.0485895	-0.139943	173.898	-3.5545	0.596196	-5.96197	2.49216e-09	5.78311e-07
BRCA	ENSG00000151640	DPYSL4	cg12250896	chr10:132187608	CGI:chr10:132185408-132187996	gene body,promoter	0.281019	0.444568	-2.04455	0.0408994	0.0463632	-0.163549	236.614	-2.19247	0.497206	-4.40958	1.03573e-05	0.000373868
BRCA	ENSG00000134762	DSC3	cg25970832	chr18:31041685	CGI:chr18:31041523-31043151	gene body,promoter	0.306979	0.459267	-2.5202	0.011729	0.0283462	-0.152288	1722.21	-3.66035	0.694201	-5.27276	1.34386e-07	1.27595e-05
BRCA	ENSG00000134762	DSC3	cg25789861	chr18:31042974	CGI:chr18:31041523-31043151	promoter	0.159286	0.393188	-2.78509	0.00535122	0.0209458	-0.233902	1722.21	-3.66035	0.694201	-5.27276	1.34386e-07	1.27595e-05
BRCA	ENSG00000134762	DSC3	cg14631834	chr18:31043074	CGI:chr18:31041523-31043151	promoter	0.250023	0.457196	-2.38409	0.0171215	0.0329407	-0.207173	1722.21	-3.66035	0.694201	-5.27276	1.34386e-07	1.27595e-05
BRCA	ENSG00000160191	PDE9A	cg17809849	chr21:42653802	CGI:chr21:42653759-42654540	gene body,UTR,exon,promoter	0.0223662	0.169431	-3.03828	0.00237929	0.0148045	-0.147064	570.392	-1.30094	0.412279	-3.15548	0.00160232	0.0158881
BRCA	ENSG00000109072	VTN	cg20686234	chr17:28372466	CGI:chr17:28371338-28372538	gene body,promoter	0.262091	0.455376	-2.4558	0.0140571	0.0304551	-0.193285	68.4457	-1.56827	0.558016	-2.81044	0.00494733	0.035616
BRCA	ENSG00000109072	VTN	cg23887396	chr17:28372532	CGI:chr17:28371338-28372538	gene body,promoter	0.272245	0.524053	-3.02219	0.00250957	0.0151876	-0.251807	68.4457	-1.56827	0.558016	-2.81044	0.00494733	0.035616
BRCA	ENSG00000166750	SLFN5	cg24398932	chr17:35243001	CGI:chr17:35242122-35243508	promoter	0.0361207	0.158222	-2.19529	0.0281426	0.0399035	-0.122101	4487.88	-1.303	0.304771	-4.27535	1.90839e-05	0.000584889
BRCA	ENSG00000172716	SLFN11	cg26573518	chr17:35373726	CGI:chr17:35373468-35373741	promoter	0.23671	0.472936	-3.50222	0.000461393	0.00572689	-0.236226	1640.75	-1.04882	0.273927	-3.82884	0.000128749	0.00250598
BRCA	ENSG00000172716	SLFN11	cg01348733	chr17:35373738	CGI:chr17:35373468-35373741	promoter	0.203297	0.481989	-3.47442	0.000511967	0.00615389	-0.278691	1640.75	-1.04882	0.273927	-3.82884	0.000128749	0.00250598
BRCA	ENSG00000141750	STAC2	cg05063952	chr17:39224444	CGI:chr17:39224700-39226110	gene body,promoter	0.589585	0.728842	-2.49678	0.0125327	0.0290286	-0.139257	2417.71	-4.39563	0.785756	-5.59414	2.21714e-08	3.27404e-06
BRCA	ENSG00000131759	RARA	cg08332908	chr17:40309074	CGI:chr17:40316706-40316949	promoter	0.298087	0.184345	2.48507	0.0129526	0.0294401	0.113743	7477.26	1.27206	0.305748	4.16049	3.17568e-05	0.000855854
BRCA	ENSG00000131096	PYY	cg16789592	chr17:44005938	CGI:chr17:44004659-44007604	promoter	0.263333	0.497889	-2.6124	0.00899096	0.0256508	-0.234555	70.9983	2.2943	0.668204	3.43353	0.00059577	0.00772513
BRCA	ENSG00000161653	NAGS	cg16789592	chr17:44005938	CGI:chr17:44004659-44007604	gene body,promoter	0.263333	0.497889	-2.6124	0.00899096	0.0256508	-0.234555	331.867	1.6753	0.393701	4.25527	2.08797e-05	0.000628079
BRCA	ENSG00000159184	HOXB13	cg21842478	chr17:48728684	CGI:chr17:48728191-48728786	gene body,UTR,exon,promoter	0.261397	0.496778	-2.70606	0.0068086	0.0230135	-0.235381	342.589	-5.29737	1.0324	-5.13113	2.88011e-07	2.32859e-05
BRCA	ENSG00000064300	NGFR	cg00024472	chr17:49496502	CGI:chr17:49494983-49497954	gene body,promoter	0.0680582	0.237894	-2.147	0.0317936	0.0419952	-0.169836	884.901	-1.72251	0.489324	-3.52019	0.000431241	0.00613978
BRCA	ENSG00000108924	HLF	cg25534244	chr17:55263737	CGI:chr17:55264837-55265673	promoter	0.660461	0.762713	-2.3636	0.0180984	0.0336571	-0.102252	493.058	-1.35626	0.461918	-2.93616	0.00332307	0.0266263
BRCA	ENSG00000183048	SLC25A10	cg09996840	chr17:81713688	CGI:chr17:81711906-81712731	gene body,promoter	0.414004	0.284278	3.41734	0.000632367	0.00707777	0.129726	1477.3	1.1877	0.279982	4.24208	2.21455e-05	0.000661698
BRCA	ENSG00000141579	ZNF750	cg21338747	chr17:82840202	CGI:chr17:82832492-82832705	gene body,UTR,exon,promoter	0.438646	0.292684	3.48612	0.000490074	0.00597437	0.145962	522.962	-1.3408	0.383955	-3.49208	0.000479266	0.00657992
BRCA	ENSG00000006747	SCIN	cg20728105	chr7:12571063	CGI:chr7:12570539-12571209	gene body,promoter	0.262894	0.433509	-1.96113	0.0498641	0.0498641	-0.170615	974.561	-2.04742	0.526144	-3.89137	9.96782e-05	0.00206618
BRCA	ENSG00000078399	HOXA9	cg18416576	chr7:27174424	CGI:chr7:27172797-27174777	gene body,promoter	0.370157	0.52388	-2.26847	0.0233007	0.037065	-0.153723	202.762	-1.75486	0.519423	-3.37847	0.000728901	0.00892055
BRCA	ENSG00000185811	IKZF1	cg27633530	chr7:50304698	CGI:chr7:50303299-50304923	gene body,promoter	0.189488	0.449429	-3.33392	0.000856322	0.00858706	-0.259941	1135.6	-1.31921	0.354134	-3.72518	0.000195177	0.00344215
BRCA	ENSG00000105810	CDK6	cg25392970	chr7:92836548	CGI:chr7:92832887-92837073	gene body,UTR,exon,promoter	0.0577425	0.162982	-2.14261	0.0321448	0.0421631	-0.105239	2232.25	-1.85283	0.405695	-4.56704	4.94656e-06	0.000211448
BRCA	ENSG00000174697	LEP	cg13381984	chr7:128241291	CGI:chr7:128240697-128241322	gene body,UTR,exon,promoter	0.615249	0.731057	-1.97137	0.0486813	0.0494341	-0.115808	307.592	-3.29994	0.79759	-4.13739	3.51271e-05	0.00091882
BRCA	ENSG00000055118	KCNH2	cg01306909	chr7:150979195	CGI:chr7:150979090-150979497	promoter	0.151123	0.270266	-1.99772	0.0457475	0.0483484	-0.119143	350.685	-1.80032	0.58891	-3.05705	0.0022353	0.0201719
BRCA	ENSG00000159307	SCUBE1	cg01237056	chr22:43343986	CGI:chr22:43342342-43344279	promoter	0.5846	0.703427	-2.26847	0.0233007	0.037065	-0.118827	707.331	1.78368	0.579327	3.07888	0.00207782	0.0191868
BRCA	ENSG00000046653	GPM6B	cg19441811	chrX:13938599	CGI:chrX:13938108-13938942	gene body,UTR,exon,promoter	0.227246	0.0954126	3.84176	0.000122155	0.00199013	0.131834	980.807	-1.16256	0.386473	-3.00812	0.00262866	0.0226903
BRCA	ENSG00000046653	GPM6B	cg10734526	chrX:13938798	CGI:chrX:13938108-13938942	promoter	0.183314	0.0426824	2.80412	0.00504541	0.0204466	0.140632	980.807	-1.16256	0.386473	-3.00812	0.00262866	0.0226903
BRCA	ENSG00000147027	TMEM47	cg21341170	chrX:34657231	CGI:chrX:34656390-34657610	gene body,UTR,exon,promoter	0.496898	0.0801133	5.14284	2.70619e-07	1.15791e-05	0.416785	1907.1	-1.16801	0.392131	-2.97862	0.00289545	0.0242668
BRCA	ENSG00000147027	TMEM47	cg23238851	chrX:34657433	CGI:chrX:34656390-34657610	promoter	0.148917	0.0121036	5.13113	2.88008e-07	1.15854e-05	0.136813	1907.1	-1.16801	0.392131	-2.97862	0.00289545	0.0242668
BRCA	ENSG00000156298	TSPAN7	cg03219705	chrX:38561325	CGI:chrX:38562012-38562225	promoter	0.349376	0.116403	4.01299	5.99534e-05	0.00111447	0.232974	598.92	-1.36428	0.375342	-3.63477	0.000278229	0.00453594
BRCA	ENSG00000156298	TSPAN7	cg09850561	chrX:38561328	CGI:chrX:38562012-38562225	promoter	0.350607	0.123634	4.00714	6.14584e-05	0.00113083	0.226973	598.92	-1.36428	0.375342	-3.63477	0.000278229	0.00453594
BRCA	ENSG00000156298	TSPAN7	cg12481479	chrX:38562183	CGI:chrX:38562012-38562225	gene body,promoter	0.392065	0.141272	3.89884	9.6655e-05	0.00163474	0.250793	598.92	-1.36428	0.375342	-3.63477	0.000278229	0.00453594
BRCA	ENSG00000147180	ZNF711	cg09990556	chrX:85243983	CGI:chrX:85243766-85244878	promoter	0.204543	0.080239	3.98372	6.78438e-05	0.0012156	0.124304	541.948	-1.55703	0.415934	-3.74346	0.000181505	0.00325943
BRCA	ENSG00000158164	TMSB15A	cg03363535	chrX:102516510	CGI:chrX:102516409-102516745	gene body,promoter	0.394923	0.149624	3.62516	0.000288783	0.00403875	0.245298	179.195	-2.11533	0.588946	-3.59172	0.000328499	0.00507969
BRCA	ENSG00000101938	CHRDL1	cg19053358	chrX:110795850	CGI:chrX:110795718-110796142	promoter	0.309454	0.0906493	4.03202	5.52995e-05	0.00106613	0.218804	972.297	-2.12175	0.558091	-3.80181	0.000143643	0.00272464
BRCA	ENSG00000101938	CHRDL1	cg19754833	chrX:110795852	CGI:chrX:110795718-110796142	promoter	0.227041	0.0676359	4.06275	4.84971e-05	0.000955055	0.159405	972.297	-2.12175	0.558091	-3.80181	0.000143643	0.00272464
BRCA	ENSG00000101938	CHRDL1	cg12485020	chrX:110796041	CGI:chrX:110795718-110796142	promoter	0.20963	0.0282842	4.58523	4.53479e-06	0.000110404	0.181346	972.297	-2.12175	0.558091	-3.80181	0.000143643	0.00272464
BRCA	ENSG00000101938	CHRDL1	cg27452062	chrX:110796186	CGI:chrX:110795718-110796142	promoter	0.188653	0.0790035	3.6076	0.000309046	0.00425373	0.10965	972.297	-2.12175	0.558091	-3.80181	0.000143643	0.00272464
BRCA	ENSG00000003096	KLHL13	cg14343687	chrX:118116514	CGI:chrX:118116270-118117066	gene body,UTR,exon,promoter	0.422558	0.130003	4.14032	3.4682e-05	0.000709921	0.292556	494.232	-1.8865	0.462184	-4.08172	4.47041e-05	0.00110175
BRCA	ENSG00000003096	KLHL13	cg13024202	chrX:118116790	CGI:chrX:118116270-118117066	gene body,UTR,exon,promoter	0.378263	0.0220976	5.16333	2.42598e-07	1.15791e-05	0.356166	494.232	-1.8865	0.462184	-4.08172	4.47041e-05	0.00110175
BRCA	ENSG00000182195	LDOC1	cg25870731	chrX:141176844	CGI:chrX:141176765-141177220	gene body,CDS,exon,promoter	0.438237	0.0399	5.16333	2.42598e-07	1.15791e-05	0.398337	3316.47	1.42679	0.295479	4.82873	1.37408e-06	7.76962e-05
BRCA	ENSG00000182195	LDOC1	cg09112156	chrX:141177074	CGI:chrX:141176765-141177220	gene body,UTR,exon,promoter	0.38539	0.0181422	5.16333	2.42598e-07	1.15791e-05	0.367247	3316.47	1.42679	0.295479	4.82873	1.37408e-06	7.76962e-05
BRCA	ENSG00000182195	LDOC1	cg27076487	chrX:141177179	CGI:chrX:141176765-141177220	promoter	0.339761	0.0228854	5.16333	2.42598e-07	1.15791e-05	0.316876	3316.47	1.42679	0.295479	4.82873	1.37408e-06	7.76962e-05
BRCA	ENSG00000013619	MAMLD1	cg07659240	chrX:150363327	CGI:chrX:150361273-150365823	gene body,UTR,exon,promoter	0.383335	0.0501765	5.03307	4.82678e-07	1.5739e-05	0.333158	432.064	-1.10908	0.375051	-2.95714	0.00310508	0.0254386
BRCA	ENSG00000125257	ABCC4	cg17370322	chr13:95301228	CGI:chr13:95301006-95301957	gene body,promoter	0.0410965	0.156652	-1.96405	0.0495237	0.0497272	-0.115556	782.07	-1.45041	0.405246	-3.57909	0.000344796	0.00524771
BRCA	ENSG00000170549	IRX1	cg01790920	chr5:3594565	CGI:chr5:3594353-3603136	promoter	0.212379	0.583265	2.13529	0.0327375	0.042455	-0.370886	597.631	-3.27918	0.637621	-5.14283	2.70631e-07	2.21818e-05
BRCA	ENSG00000133401	PDZD2	cg24134479	chr5:31639592	CGI:chr5:31638946-31639997	gene body,promoter	0.0824144	0.213231	-2.24798	0.0245775	0.0378249	-0.130817	1436.86	-1.47033	0.339244	-4.33414	1.46331e-05	0.000476246
BRCA	ENSG00000113763	UNC5A	cg08494545	chr5:176810380	CGI:chr5:176809760-176811080	promoter	0.0352393	0.199005	-2.10163	0.035586	0.0439176	-0.163766	536.108	-1.80309	0.574619	-3.13788	0.00170172	0.0166428
BRCA	ENSG00000234284	ZNF879	cg00601350	chr5:179023757	CGI:chr5:179023629-179024215	gene body,UTR,exon,promoter	0.0696464	0.303106	-2.56264	0.010388	0.0270593	-0.233459	261.689	-1.14874	0.255377	-4.49821	6.85289e-06	0.00027332
BRCA	ENSG00000234284	ZNF879	cg00594128	chr5:179023881	CGI:chr5:179023629-179024215	gene body,UTR,exon,promoter	0.0574557	0.264137	-2.21285	0.0269077	0.0391929	-0.206681	261.689	-1.14874	0.255377	-4.49821	6.85289e-06	0.00027332
BRCA	ENSG00000177932	ZNF354C	cg19761115	chr5:179060309	CGI:chr5:179060145-179060920	promoter	0.109417	0.395671	-3.41295	0.000642643	0.00714384	-0.286254	437.385	-1.29895	0.282355	-4.60041	4.21653e-06	0.000188825
BRCA	ENSG00000177932	ZNF354C	cg10864596	chr5:179060381	CGI:chr5:179060145-179060920	promoter	0.0374018	0.146541	-3.14366	0.0016685	0.0124166	-0.109139	437.385	-1.29895	0.282355	-4.60041	4.21653e-06	0.000188825
BRCA	ENSG00000177932	ZNF354C	cg07515940	chr5:179060575	CGI:chr5:179060145-179060920	gene body,UTR,exon,promoter	0.0767511	0.219918	-3.59735	0.000321473	0.00438513	-0.143167	437.385	-1.29895	0.282355	-4.60041	4.21653e-06	0.000188825
BRCA	ENSG00000177932	ZNF354C	cg19025430	chr5:179060825	CGI:chr5:179060145-179060920	gene body,promoter	0.222275	0.439327	-3.0939	0.00197545	0.0135298	-0.217052	437.385	-1.29895	0.282355	-4.60041	4.21653e-06	0.000188825
BRCA	ENSG00000161055	SCGB3A1	cg09500443	chr5:180591465	CGI:chr5:180590099-180592062	gene body,UTR,exon,promoter	0.431512	0.713795	-3.68224	0.000231196	0.0033898	-0.282283	394.737	-3.81965	0.773273	-4.93958	7.82908e-07	5.06848e-05
BRCA	ENSG00000161055	SCGB3A1	cg10508993	chr5:180591495	CGI:chr5:180590099-180592062	gene body,UTR,exon,promoter	0.393488	0.61444	-3.50515	0.00045635	0.00567691	-0.220952	394.737	-3.81965	0.773273	-4.93958	7.82908e-07	5.06848e-05
BRCA	ENSG00000161055	SCGB3A1	cg11916729	chr5:180591564	CGI:chr5:180590099-180592062	promoter	0.317116	0.591742	-3.19635	0.0013918	0.0112991	-0.274625	394.737	-3.81965	0.773273	-4.93958	7.82908e-07	5.06848e-05
BRCA	ENSG00000161055	SCGB3A1	cg01174140	chr5:180591735	CGI:chr5:180590099-180592062	promoter	0.379499	0.533359	-2.48068	0.0131132	0.0295913	-0.15386	394.737	-3.81965	0.773273	-4.93958	7.82908e-07	5.06848e-05
BRCA	ENSG00000257108	NHLRC4	cg06297391	chr16:566827	CGI:chr16:565682-565927	promoter	0.300646	0.53903	-2.32555	0.0200428	0.0349771	-0.238384	278.608	-1.56846	0.481735	-3.25585	0.00113053	0.0124386
BRCA	ENSG00000257108	NHLRC4	cg27063372	chr16:566857	CGI:chr16:565682-565927	promoter	0.515355	0.707101	-2.28896	0.0220818	0.0363414	-0.191746	278.608	-1.56846	0.481735	-3.25585	0.00113053	0.0124386
BRCA	ENSG00000005513	SOX8	cg02925162	chr16:981205	CGI:chr16:979878-985327	promoter	0.141979	0.385458	-3.10268	0.00191777	0.0133463	-0.243479	255.217	-3.32514	0.672615	-4.9436	7.66943e-07	4.98318e-05
BRCA	ENSG00000005513	SOX8	cg05933904	chr16:982266	CGI:chr16:979878-985327	gene body,CDS,exon,promoter	0.301377	0.654277	-3.60321	0.000314316	0.00431297	-0.3529	255.217	-3.32514	0.672615	-4.9436	7.66943e-07	4.98318e-05
BRCA	ENSG00000103024	NME3	cg09540102	chr16:1772123	CGI:chr16:1770310-1773953	promoter	0.242751	0.122257	3.24025	0.00119424	0.0104515	0.120495	3435.74	1.20279	0.324525	3.70632	0.000210291	0.00365323
BRCA	ENSG00000166501	PRKCB	cg08406370	chr16:23835572	CGI:chr16:23835620-23836781	promoter	0.362304	0.615287	-2.84949	0.00437895	0.0192798	-0.252982	556.836	-1.96632	0.436261	-4.5072	6.56879e-06	0.000263164
BRCA	ENSG00000166501	PRKCB	cg03306374	chr16:23836004	CGI:chr16:23835620-23836781	gene body,UTR,exon,promoter	0.541262	0.743767	-2.56849	0.0102142	0.0268868	-0.202505	556.836	-1.96632	0.436261	-4.5072	6.56879e-06	0.000263164
BRCA	ENSG00000166501	PRKCB	cg03217795	chr16:23836235	CGI:chr16:23835620-23836781	gene body,CDS,exon,promoter	0.453484	0.676839	-2.84656	0.00441941	0.0193397	-0.223356	556.836	-1.96632	0.436261	-4.5072	6.56879e-06	0.000263164
BRCA	ENSG00000166501	PRKCB	cg09507526	chr16:23836495	CGI:chr16:23835620-23836781	gene body,promoter	0.291106	0.526534	-2.65191	0.00800372	0.0245414	-0.235427	556.836	-1.96632	0.436261	-4.5072	6.56879e-06	0.000263164
BRCA	ENSG00000169900	PYDC1	cg00133595	chr16:31216738	CGI:chr16:31214687-31216943	gene body,promoter	0.224474	0.405672	-1.97576	0.0481816	0.0492463	-0.181198	390.109	-4.00008	0.896984	-4.45947	8.21622e-06	0.000314646
BRCA	ENSG00000169900	PYDC1	cg10038009	chr16:31216881	CGI:chr16:31214687-31216943	gene body,CDS,exon,promoter	0.233105	0.435244	-2.21139	0.0270088	0.0392395	-0.202139	390.109	-4.00008	0.896984	-4.45947	8.21622e-06	0.000314646
BRCA	ENSG00000176692	FOXC2	cg07249459	chr16:86566703	CGI:chr16:86565749-86569043	promoter	0.288548	0.489801	-2.34896	0.0188258	0.0341719	-0.201253	174.257	-2.06217	0.512168	-4.02635	5.66482e-05	0.00133008
BRCA	ENSG00000176692	FOXC2	cg09360770	chr16:86566720	CGI:chr16:86565749-86569043	promoter	0.393493	0.652613	-2.73972	0.00614907	0.0221075	-0.25912	174.257	-2.06217	0.512168	-4.02635	5.66482e-05	0.00133008
BRCA	ENSG00000176692	FOXC2	cg02943578	chr16:86566893	CGI:chr16:86565749-86569043	promoter	0.333482	0.504726	-2.16895	0.0300866	0.0410202	-0.171244	174.257	-2.06217	0.512168	-4.02635	5.66482e-05	0.00133008
BRCA	ENSG00000144648	ACKR2	cg01996116	chr3:42805415	CGI:chr3:42803944-42804863	gene body,exon,promoter	0.386191	0.194965	2.51434	0.0119255	0.0285105	0.191226	318.829	-2.15613	0.54236	-3.97546	7.02436e-05	0.00156481
BRCA	ENSG00000144857	BOC	cg10529387	chr3:113212347	CGI:chr3:113211590-113212659	gene body,UTR,exon,promoter	0.0598847	0.230615	-2.39433	0.0166507	0.0325766	-0.170731	1502.98	-1.61256	0.386224	-4.17519	2.97743e-05	0.000814713
BRCA	ENSG00000163710	PCOLCE2	cg10991303	chr3:142889209	CGI:chr3:142888353-142889387	promoter	0.0731853	0.207082	-2.12358	0.0337053	0.0429638	-0.133896	327.178	-2.44902	0.598951	-4.08886	4.33506e-05	0.00107284
BRCA	ENSG00000163710	PCOLCE2	cg06341749	chr3:142889221	CGI:chr3:142888353-142889387	promoter	0.0647	0.168348	-2.43824	0.0147591	0.0310586	-0.103648	327.178	-2.44902	0.598951	-4.08886	4.33506e-05	0.00107284
BRCA	ENSG00000175040	CHST2	cg17373442	chr3:143121149	CGI:chr3:143119043-143121996	gene body,CDS,exon,promoter	0.446418	0.611222	-2.12651	0.0334611	0.0428335	-0.164805	590.8	-1.29295	0.383403	-3.37231	0.000745403	0.00909137
BRCA	ENSG00000118849	RARRES1	cg14226182	chr3:158732462	CGI:chr3:158732006-158732808	gene body,UTR,exon,promoter	0.07024	0.208155	-2.25822	0.0239317	0.0374375	-0.137915	3497.91	-3.05475	0.603063	-5.06539	4.07569e-07	3.09891e-05
BRCA	ENSG00000118849	RARRES1	cg08977270	chr3:158733044	CGI:chr3:158732006-158732808	promoter	0.67641	0.818145	-2.14261	0.0321448	0.0421631	-0.141735	3497.91	-3.05475	0.603063	-5.06539	4.07569e-07	3.09891e-05
BRCA	ENSG00000078081	LAMP3	cg01698108	chr3:183162682	CGI:chr3:183162489-183162934	gene body,UTR,exon,promoter	0.171827	0.375694	-2.77339	0.00554763	0.0212537	-0.203867	887.954	-2.75296	0.515943	-5.33578	9.51333e-08	9.8828e-06
BRCA	ENSG00000078081	LAMP3	cg02072885	chr3:183162689	CGI:chr3:183162489-183162934	gene body,UTR,exon,promoter	0.205796	0.43496	-2.58605	0.00970816	0.0263607	-0.229164	887.954	-2.75296	0.515943	-5.33578	9.51333e-08	9.8828e-06
BRCA	ENSG00000176597	B3GNT5	cg16938490	chr3:183253237	CGI:chr3:183253185-183254847	promoter	0.148809	0.393038	-3.22415	0.00126346	0.0107963	-0.24423	631.105	-2.37737	0.452656	-5.25205	1.50415e-07	1.38537e-05
BRCA	ENSG00000176597	B3GNT5	cg03657573	chr3:183254538	CGI:chr3:183253185-183254847	gene body,promoter	0.27338	0.602273	-3.1539	0.00161103	0.0121921	-0.328893	631.105	-2.37737	0.452656	-5.25205	1.50415e-07	1.38537e-05
BRCA	ENSG00000073849	ST6GAL1	cg24050613	chr3:186930490	CGI:chr3:186930385-186931314	gene body,UTR,exon,promoter	0.134778	0.285098	-2.09138	0.0364939	0.0443065	-0.150321	5608.34	-2.06679	0.351227	-5.88449	3.99293e-09	7.92729e-07
BRCA	ENSG00000073849	ST6GAL1	cg13419791	chr3:186930496	CGI:chr3:186930385-186931314	gene body,UTR,exon,promoter	0.0932177	0.229294	-2.26993	0.0232117	0.0370114	-0.136076	5608.34	-2.06679	0.351227	-5.88449	3.99293e-09	7.92729e-07
BRCA	ENSG00000073849	ST6GAL1	cg25372568	chr3:186930755	CGI:chr3:186930385-186931314	gene body,UTR,exon,promoter	0.0517826	0.250182	-2.63289	0.00846625	0.0250634	-0.1984	5608.34	-2.06679	0.351227	-5.88449	3.99293e-09	7.92729e-07
BRCA	ENSG00000237330	RNF223	cg27222785	chr1:1072711	CGI:chr1:1071836-1072253	gene body,promoter	0.619517	0.463934	2.4719	0.0134397	0.0298911	0.155582	225.138	1.19455	0.40106	2.97848	0.00289685	0.0242668
BRCA	ENSG00000237330	RNF223	cg09864227	chr1:1072827	CGI:chr1:1071836-1072253	gene body,promoter	0.464726	0.30075	2.5641	0.0103443	0.0270117	0.163976	225.138	1.19455	0.40106	2.97848	0.00289685	0.0242668
BRCA	ENSG00000171608	PIK3CD	cg16895792	chr1:9651595	CGI:chr1:9651674-9652943	promoter	0.125039	0.333198	-2.49678	0.0125327	0.0290286	-0.208159	1133.08	-1.12247	0.297562	-3.77222	0.000161798	0.00298043
BRCA	ENSG00000171608	PIK3CD	cg18284427	chr1:9653226	CGI:chr1:9651674-9652943	gene body,promoter	0.572567	0.699297	-2.37677	0.017465	0.0331802	-0.12673	1133.08	-1.12247	0.297562	-3.77222	0.000161798	0.00298043
BRCA	ENSG00000188257	PLA2G2A	cg13211559	chr1:19981573	CGI:chr1:19882314-19882969	promoter	0.778448	0.880551	-2.15431	0.0312156	0.0416722	-0.102103	700.642	-3.91774	0.710151	-5.51677	3.45287e-08	4.50335e-06
BRCA	ENSG00000162551	ALPL	cg07162257	chr1:21509199	CGI:chr1:21509055-21509851	promoter	0.0551161	0.166856	-2.2714	0.023123	0.0369615	-0.11174	1310.19	-1.58334	0.435036	-3.63955	0.000273115	0.00447298
BRCA	ENSG00000162551	ALPL	cg05364759	chr1:21509452	CGI:chr1:21509055-21509851	gene body,UTR,exon,promoter	0.220053	0.4713	-2.46751	0.0136057	0.0300387	-0.251247	1310.19	-1.58334	0.435036	-3.63955	0.000273115	0.00447298
BRCA	ENSG00000185483	ROR1	cg00504690	chr1:63774531	CGI:chr1:63773794-63775108	gene body,promoter	0.0297778	0.138604	-2.78802	0.00530311	0.0208697	-0.108827	388.17	-1.00098	0.376278	-2.66021	0.00780921	0.0487486
BRCA	ENSG00000185483	ROR1	cg07602998	chr1:63774983	CGI:chr1:63773794-63775108	gene body,promoter	0.0486949	0.174577	-1.97137	0.0486813	0.0494341	-0.125882	388.17	-1.00098	0.376278	-2.66021	0.00780921	0.0487486
BRCA	ENSG00000225556	C2CD4D	cg12749132	chr1:151838888	CGI:chr1:151837984-151839208	gene body,CDS,exon,promoter	0.653373	0.780789	-1.97284	0.0485143	0.0493708	-0.127416	129.826	-1.1286	0.354507	-3.18358	0.00145468	0.0148442
BRCA	ENSG00000213088	ACKR1	cg07202479	chr1:159204372	CGI:chr1:159188438-159188708	gene body,UTR,exon,promoter	0.306074	0.195576	3.28562	0.00101758	0.00951464	0.110498	1406.94	-1.66191	0.587242	-2.83002	0.00465446	0.0340844
BRCA	ENSG00000198821	CD247	cg09032544	chr1:167518058	CGI:chr1:167553232-167553833	gene body,promoter	0.82869	0.937086	-2.7368	0.00620404	0.0221931	-0.108396	360.977	-1.47535	0.429185	-3.43755	0.000587	0.0076447
BRCA	ENSG00000198821	CD247	cg07786657	chr1:167518396	CGI:chr1:167553232-167553833	gene body,promoter	0.806795	0.914359	-2.23773	0.0252384	0.038215	-0.107564	360.977	-1.47535	0.429185	-3.43755	0.000587	0.0076447
BRCA	ENSG00000133048	CHI3L1	cg19081101	chr1:203187497	CGI:chr1:203128105-203128368	promoter	0.769615	0.944184	-2.63581	0.00839357	0.0249763	-0.17457	6904.49	-3.03585	0.617599	-4.91556	8.8527e-07	5.5894e-05
BRCA	ENSG00000092969	TGFB2	cg01558923	chr1:218347617	CGI:chr1:218346945-218347164	gene body,promoter	0.332524	0.522946	-2.23627	0.025334	0.0382811	-0.190421	1265.24	-1.26329	0.460187	-2.74516	0.00604807	0.0408346
BRCA	ENSG00000203685	C1orf95	cg15592945	chr1:226549010	CGI:chr1:226548679-226549711	gene body,CDS,exon,promoter	0.0422903	0.23403	-2.02552	0.0428137	0.0471456	-0.19174	541.12	-2.65192	0.648252	-4.09088	4.29744e-05	0.00106648
BRCA	ENSG00000203685	C1orf95	cg16705351	chr1:226549544	CGI:chr1:226548679-226549711	gene body,promoter	0.0568505	0.17828	-2.85095	0.00435884	0.0192406	-0.12143	541.12	-2.65192	0.648252	-4.09088	4.29744e-05	0.00106648
BRCA	ENSG00000143632	ACTA1	cg23597629	chr1:229433923	CGI:chr1:229431459-229434937	gene body,promoter	0.337428	0.564913	-3.6076	0.000309046	0.00425373	-0.227484	241.774	-2.6985	0.636196	-4.24161	2.21917e-05	0.000661973
BRCA	ENSG00000143632	ACTA1	cg11689813	chr1:229434305	CGI:chr1:229431459-229434937	promoter	0.14263	0.294282	-2.24505	0.0247648	0.037944	-0.151652	241.774	-2.6985	0.636196	-4.24161	2.21917e-05	0.000661973
BRCA	ENSG00000104332	SFRP1	cg21517947	chr8:41309588	CGI:chr8:41308333-41309621	promoter	0.259882	0.501028	-2.46751	0.0136057	0.0300387	-0.241146	10421.1	-3.77029	0.669212	-5.63393	1.76153e-08	2.71336e-06
BRCA	ENSG00000254087	LYN	cg06288821	chr8:55879323	CGI:chr8:55879556-55880766	promoter	0.251024	0.429293	-2.35043	0.0187519	0.0341248	-0.178268	2128.91	-1.07835	0.288334	-3.73994	0.000184061	0.00329217
BRCA	ENSG00000254087	LYN	cg23411725	chr8:55879657	CGI:chr8:55879556-55880766	promoter	0.113324	0.306003	-2.53337	0.0112973	0.0279524	-0.192679	2128.91	-1.07835	0.288334	-3.73994	0.000184061	0.00329217
BRCA	ENSG00000254087	LYN	cg12929040	chr8:55879814	CGI:chr8:55879556-55880766	gene body,UTR,exon,promoter	0.128919	0.288596	-2.05479	0.0398989	0.0459374	-0.159677	2128.91	-1.07835	0.288334	-3.73994	0.000184061	0.00329217
BRCA	ENSG00000198846	TOX	cg24158594	chr8:59118204	CGI:chr8:59117575-59120187	gene body,promoter	0.362744	0.564807	-1.97869	0.0478509	0.0491265	-0.202063	238.479	-1.93732	0.443685	-4.36643	1.26291e-05	0.000428192
BRCA	ENSG00000104321	TRPA1	cg19439706	chr8:72075637	CGI:chr8:72075245-72075788	promoter	0.169696	0.399956	-2.14846	0.0316773	0.0419176	-0.23026	328.332	-2.50773	0.747001	-3.35706	0.000787763	0.00945316
BRCA	ENSG00000198576	ARC	cg23210049	chr8:142614532	CGI:chr8:142613069-142614805	promoter	0.0287716	0.233894	-2.12943	0.0332184	0.0427139	-0.205123	179.995	-2.90241	0.622428	-4.66304	3.11565e-06	0.000150869
BRCA	ENSG00000185559	DLK1	cg02874376	chr14:100727060	CGI:chr14:100726036-100727400	gene body,UTR,exon,promoter	0.418506	0.64526	-3.22269	0.00126993	0.0108089	-0.226754	202.808	-4.21371	1.25089	-3.36858	0.000755561	0.00918392
BRCA	ENSG00000175318	GRAMD2	cg00635674	chr15:72198107	CGI:chr15:72197137-72197775	promoter	0.741529	0.858774	-2.10016	0.0357145	0.0439612	-0.117245	650.648	-2.21359	0.470534	-4.70441	2.54596e-06	0.000128144
BRCA	ENSG00000182175	RGMA	cg07491495	chr15:93088349	CGI:chr15:93088199-93089944	gene body,UTR,exon,promoter	0.088569	0.335763	-2.32262	0.0201996	0.0350953	-0.247194	1080.69	-2.10665	0.478808	-4.39979	1.08357e-05	0.000387226
BRCA	ENSG00000182175	RGMA	cg01950845	chr15:93089501	CGI:chr15:93088199-93089944	promoter	0.252277	0.455671	-2.39726	0.0165182	0.0324712	-0.203395	1080.69	-2.10665	0.478808	-4.39979	1.08357e-05	0.000387226
BRCA	ENSG00000135069	PSAT1	cg25336579	chr9:78297344	CGI:chr9:78296863-78297695	gene body,promoter	0.0887013	0.259278	-2.02845	0.0425143	0.0470162	-0.170577	1038.65	-2.5763	0.623733	-4.13045	3.62055e-05	0.000938927
BRCA	ENSG00000196730	DAPK1	cg20401521	chr9:87497796	CGI:chr9:87497599-87498902	gene body,UTR,exon,promoter	0.103175	0.2673	-2.10016	0.0357145	0.0439612	-0.164125	1699.94	-1.12736	0.331029	-3.40563	0.000660107	0.00835917
BRCA	ENSG00000196730	DAPK1	cg13527872	chr9:87499122	CGI:chr9:87497599-87498902	gene body,CDS,exon,promoter	0.573043	0.741234	-2.21871	0.0265065	0.0389714	-0.168191	1699.94	-1.12736	0.331029	-3.40563	0.000660107	0.00835917
BRCA	ENSG00000131668	BARX1	cg14127859	chr9:93954646	CGI:chr9:93951044-93955904	gene body,promoter	0.446952	0.599889	-2.37092	0.0177441	0.0334053	-0.152937	71.7315	-4.62719	0.756296	-6.11822	9.46244e-10	2.71039e-07
BRCA	ENSG00000081377	CDC14B	cg14069192	chr9:96618770	CGI:chr9:96618532-96619954	gene body,promoter	0.0985213	0.28418	-2.62264	0.00872508	0.0253688	-0.185659	716.006	-1.03401	0.247288	-4.18138	2.89748e-05	0.000796959
BRCA	ENSG00000081377	CDC14B	cg14545970	chr9:96619802	CGI:chr9:96618532-96619954	gene body,UTR,exon,promoter	0.046394	0.193435	-3.03682	0.00239087	0.014849	-0.147041	716.006	-1.03401	0.247288	-4.18138	2.89748e-05	0.000796959
BRCA	ENSG00000081377	CDC14B	cg14617810	chr9:96619911	CGI:chr9:96618532-96619954	promoter	0.0616953	0.285771	-3.10707	0.00188951	0.0132529	-0.224076	716.006	-1.03401	0.247288	-4.18138	2.89748e-05	0.000796959
BRCA	ENSG00000119514	GALNT12	cg14400354	chr9:98808421	CGI:chr9:98807620-98808067	gene body,promoter	0.277829	0.525521	-2.7529	0.00590706	0.0217895	-0.247692	198.809	-1.43792	0.422803	-3.40092	0.000671588	0.00846855
BRCA	ENSG00000171119	NRTN	cg25775109	chr19:5823775	CGI:chr19:5824092-5824323	promoter	0.639763	0.447381	2.56703	0.0102574	0.0269349	0.192381	90.7145	-1.49466	0.549698	-2.71906	0.00654683	0.0432294
BRCA	ENSG00000171119	NRTN	cg06515543	chr19:5823780	CGI:chr19:5824092-5824323	promoter	0.553336	0.401916	2.3475	0.0188999	0.0342036	0.15142	90.7145	-1.49466	0.549698	-2.71906	0.00654683	0.0432294
BRCA	ENSG00000167772	ANGPTL4	cg24803730	chr19:8364555	CGI:chr19:8364081-8364608	gene body,CDS,exon,promoter	0.0977314	0.424642	-4.05251	5.06712e-05	0.000990009	-0.326911	1144.18	-1.50526	0.491624	-3.06181	0.0022	0.019944
BRCA	ENSG00000160111	CPAMD8	cg18569070	chr19:17025752	CGI:chr19:17026495-17027272	gene body,promoter	0.657748	0.807713	-2.16163	0.0306466	0.0413536	-0.149965	800.975	-1.78642	0.457199	-3.90732	9.33245e-05	0.00195073
BRCA	ENSG00000160111	CPAMD8	cg16903913	chr19:17026904	CGI:chr19:17026495-17027272	promoter	0.0824369	0.215155	-3.18756	0.00143477	0.011496	-0.132718	800.975	-1.78642	0.457199	-3.90732	9.33245e-05	0.00195073
BRCA	ENSG00000160111	CPAMD8	cg18465484	chr19:17027241	CGI:chr19:17026495-17027272	promoter	0.615114	0.762859	-2.03577	0.0417737	0.0466967	-0.147745	800.975	-1.78642	0.457199	-3.90732	9.33245e-05	0.00195073
BRCA	ENSG00000105639	JAK3	cg07633506	chr19:17847530	CGI:chr19:17847693-17847999	gene body,promoter	0.31135	0.463815	-2.54068	0.0110636	0.0277245	-0.152466	901.035	-1.30147	0.356543	-3.65024	0.000261999	0.00432263
BRCA	ENSG00000256229	ZNF486	cg08471835	chr19:20167614	CGI:chr19:20051963-20052298	gene body,promoter	0.204404	0.0633911	2.75729	0.00582832	0.0216733	0.141013	1219.85	2.47881	0.42119	5.88527	3.97409e-09	7.92729e-07
BRCA	ENSG00000104814	MAP4K1	cg19457477	chr19:38617969	CGI:chr19:38618792-38619222	gene body,UTR,exon,promoter	0.385571	0.581966	-2.33286	0.0196553	0.0347032	-0.196395	526.491	-1.08212	0.360866	-2.99867	0.0027116	0.0231572
BRCA	ENSG00000129455	KLK8	cg26749518	chr19:51002909	CGI:chr19:51002658-51003107	promoter	0.527737	0.715734	-2.0226	0.0431148	0.0472767	-0.187998	143.369	-3.67919	0.876564	-4.19729	2.70134e-05	0.00075536
BRCA	ENSG00000129451	KLK10	cg18437710	chr19:51019638	CGI:chr19:51018748-51019547	gene body,UTR,exon,promoter	0.224181	0.516343	-3.56955	0.000357602	0.00474084	-0.292162	930.462	-4.84008	0.800488	-6.0464	1.48115e-09	3.78073e-07
BRCA	ENSG00000167614	TTYH1	cg15241920	chr19:54415340	CGI:chr19:54415229-54415654	gene body,promoter	0.230006	0.476991	-2.26993	0.0232117	0.0370114	-0.246986	701.269	-3.58232	0.69785	-5.13337	2.84605e-07	2.31151e-05
BRCA	ENSG00000167614	TTYH1	cg15723536	chr19:54415443	CGI:chr19:54415229-54415654	gene body,UTR,exon,promoter	0.239134	0.384566	-2.12065	0.0339511	0.043077	-0.145432	701.269	-3.58232	0.69785	-5.13337	2.84605e-07	2.31151e-05
BRCA	ENSG00000167614	TTYH1	cg09474331	chr19:54415631	CGI:chr19:54415229-54415654	gene body,CDS,exon,promoter	0.343909	0.58224	-2.67826	0.00740065	0.023829	-0.238331	701.269	-3.58232	0.69785	-5.13337	2.84605e-07	2.31151e-05
BRCA	ENSG00000167614	TTYH1	cg00813890	chr19:54416117	CGI:chr19:54415229-54415654	gene body,exon,promoter	0.271773	0.463583	-2.6446	0.00817886	0.024723	-0.19181	701.269	-3.58232	0.69785	-5.13337	2.84605e-07	2.31151e-05
BRCA	ENSG00000196263	ZNF471	cg00674365	chr19:56507700	CGI:chr19:56507374-56508137	promoter	0.291419	0.67147	-3.53881	0.000401933	0.00516697	-0.38005	470.573	-1.28591	0.357195	-3.60002	0.000318195	0.0049827
BRCA	ENSG00000196263	ZNF471	cg19358877	chr19:56507910	CGI:chr19:56507374-56508137	gene body,UTR,exon,promoter	0.194022	0.528544	-3.44075	0.000580094	0.00669753	-0.334522	470.573	-1.28591	0.357195	-3.60002	0.000318195	0.0049827
BRCA	ENSG00000137265	IRF4	cg21277995	chr6:393239	CGI:chr6:391188-393802	gene body,CDS,exon,promoter	0.297153	0.532144	-2.0343	0.0419209	0.0467513	-0.234991	428.89	-2.6852	0.514733	-5.21669	1.82152e-07	1.61925e-05
BRCA	ENSG00000137285	TUBB2B	cg06292958	chr6:3230953	CGI:chr6:3231361-3232055	gene body,promoter	0.146243	0.360809	-2.24652	0.024671	0.0378774	-0.214566	341.05	-2.27667	0.561126	-4.05733	4.96367e-05	0.00119048
BRCA	ENSG00000079689	SCGN	cg04200224	chr6:25652162	CGI:chr6:25652230-25652481	promoter	0.280606	0.505243	-3.11292	0.00185243	0.0131206	-0.224638	89.2565	-3.38436	0.871962	-3.88132	0.000103891	0.00213246
BRCA	ENSG00000079689	SCGN	cg15562220	chr6:25652167	CGI:chr6:25652230-25652481	promoter	0.362271	0.616616	-3.02219	0.00250957	0.0151876	-0.254345	89.2565	-3.38436	0.871962	-3.88132	0.000103891	0.00213246
BRCA	ENSG00000204248	COL11A2	cg24519146	chr6:33192541	CGI:chr6:33192214-33192555	promoter	0.19601	0.361646	-2.0226	0.0431148	0.0472767	-0.165636	191.726	-2.35553	0.595117	-3.95809	7.55513e-05	0.00166455
BRCA	ENSG00000204248	COL11A2	cg25459558	chr6:33193513	CGI:chr6:33193168-33193560	promoter	0.46736	0.623094	-1.97576	0.0481816	0.0492463	-0.155733	191.726	-2.35553	0.595117	-3.95809	7.55513e-05	0.00166455
BRCA	ENSG00000204248	COL11A2	cg08481075	chr6:33193551	CGI:chr6:33193168-33193560	promoter	0.641788	0.810017	-1.96698	0.0491853	0.049612	-0.168229	191.726	-2.35553	0.595117	-3.95809	7.55513e-05	0.00166455
BRCA	ENSG00000204248	COL11A2	cg03949284	chr6:33193556	CGI:chr6:33193168-33193560	promoter	0.4145	0.558019	-2.25237	0.0242989	0.037661	-0.143519	191.726	-2.35553	0.595117	-3.95809	7.55513e-05	0.00166455
BRCA	ENSG00000008196	TFAP2B	cg07103129	chr6:50820251	CGI:chr6:50819573-50820378	gene body,promoter	0.220367	0.413066	-2.47044	0.0134949	0.0299322	-0.192699	4208.33	-2.83449	0.748445	-3.78717	0.000152373	0.00284791
BRCA	ENSG00000118495	PLAGL1	cg02279224	chr6:144065023	CGI:chr6:144063757-144064751	promoter	0.341521	0.448367	-2.21139	0.0270088	0.0392395	-0.106846	821.34	-1.08288	0.356299	-3.03926	0.00237164	0.0210716
BRCA	ENSG00000131015	ULBP2	cg09567080	chr6:149941627	CGI:chr6:149941567-149942541	promoter	0.0536757	0.180652	-2.09285	0.036363	0.0442374	-0.126977	85.2674	-1.64273	0.482313	-3.40594	0.000659377	0.00835758
BRCA	ENSG00000198729	PPP1R14C	cg26031255	chr6:150142829	CGI:chr6:150142635-150143866	promoter	0.18591	0.439095	-2.86998	0.00410499	0.0187785	-0.253185	598.357	-4.19688	0.712568	-5.8898	3.86668e-09	7.87944e-07
BRCA	ENSG00000198729	PPP1R14C	cg16715162	chr6:150142854	CGI:chr6:150142635-150143866	promoter	0.149544	0.402222	-2.61532	0.00891426	0.0255714	-0.252678	598.357	-4.19688	0.712568	-5.8898	3.86668e-09	7.87944e-07
BRCA	ENSG00000198729	PPP1R14C	cg20131263	chr6:150143129	CGI:chr6:150142635-150143866	gene body,UTR,exon,promoter	0.14197	0.363119	-2.72802	0.00637164	0.0224073	-0.22115	598.357	-4.19688	0.712568	-5.8898	3.86668e-09	7.87944e-07
BRCA	ENSG00000156076	WIF1	cg21383810	chr12:65121690	CGI:chr12:65121098-65122083	promoter	0.356926	0.632653	-3.05585	0.00224426	0.0144046	-0.275728	188.911	-4.66529	0.937198	-4.97791	6.4274e-07	4.34383e-05
BRCA	ENSG00000256870	SLC5A8	cg14730445	chr12:101209803	CGI:chr12:101209609-101210155	gene body,CDS,exon,promoter	0.21533	0.429255	-2.59776	0.00938334	0.0260339	-0.213925	475.709	-6.65173	1.08748	-6.11665	9.55645e-10	2.71039e-07
BRCA	ENSG00000256870	SLC5A8	cg26490054	chr12:101210278	CGI:chr12:101209609-101210155	gene body,UTR,exon,promoter	0.128157	0.420698	-2.96072	0.00306923	0.0166113	-0.292541	475.709	-6.65173	1.08748	-6.11665	9.55645e-10	2.71039e-07
BRCA	ENSG00000139352	ASCL1	cg08927739	chr12:102956964	CGI:chr12:102956311-102956644	promoter	0.251662	0.397647	-2.13821	0.0324993	0.0423403	-0.145984	220.07	-5.02808	1.12143	-4.48362	7.33875e-06	0.000288195
BRCA	ENSG00000139352	ASCL1	cg16921310	chr12:102958209	CGI:chr12:102957360-102958917	gene body,UTR,exon,promoter	0.201124	0.410842	-2.24652	0.024671	0.0378774	-0.209718	220.07	-5.02808	1.12143	-4.48362	7.33875e-06	0.000288195
BRCA	ENSG00000111344	RASAL1	cg06521025	chr12:113135338	CGI:chr12:113135172-113135953	gene body,promoter	0.0997601	0.28927	-2.52751	0.0114874	0.0281472	-0.18951	328.766	-3.0708	0.579309	-5.30081	1.15292e-07	1.14446e-05
BRCA	ENSG00000111344	RASAL1	cg11358257	chr12:113135716	CGI:chr12:113135172-113135953	gene body,UTR,exon,promoter	0.110959	0.299335	-2.40019	0.0163867	0.0323608	-0.188376	328.766	-3.0708	0.579309	-5.30081	1.15292e-07	1.14446e-05
BRCA	ENSG00000111344	RASAL1	cg15792158	chr12:113136279	CGI:chr12:113135172-113135953	promoter	0.157235	0.28827	-2.23334	0.0255263	0.0383975	-0.131034	328.766	-3.0708	0.579309	-5.30081	1.15292e-07	1.14446e-05
BRCA	ENSG00000176887	SOX11	cg08526991	chr2:5691262	CGI:chr2:5691055-5694076	promoter	0.487515	0.64956	-2.03284	0.0420686	0.0468186	-0.162044	1032.14	-2.63124	0.662989	-3.96875	7.2252e-05	0.00159975
BRCA	ENSG00000176887	SOX11	cg18863333	chr2:5693063	CGI:chr2:5691055-5694076	gene body,CDS,exon,promoter	0.139296	0.287465	-2.64899	0.00807337	0.0246129	-0.148169	1032.14	-2.63124	0.662989	-3.96875	7.2252e-05	0.00159975
BRCA	ENSG00000143882	ATP6V1C2	cg14035550	chr2:10721295	CGI:chr2:10721080-10722256	promoter	0.1055	0.259048	-2.11919	0.0340745	0.0431527	-0.153548	351.422	-1.42123	0.468229	-3.03533	0.00240272	0.0212533
BRCA	ENSG00000143882	ATP6V1C2	cg21076935	chr2:10721476	CGI:chr2:10721080-10722256	promoter	0.0403305	0.22866	-2.23481	0.02543	0.0383422	-0.188329	351.422	-1.42123	0.468229	-3.03533	0.00240272	0.0212533
BRCA	ENSG00000134323	MYCN	cg22311507	chr2:15939799	CGI:chr2:15939679-15942910	promoter	0.0316766	0.2445	-2.17627	0.0295353	0.040723	-0.212823	180.336	-1.8452	0.545194	-3.38448	0.000713122	0.00880585
BRCA	ENSG00000134323	MYCN	cg21353292	chr2:15939861	CGI:chr2:15939679-15942910	promoter	0.0275631	0.215861	-2.89193	0.00382881	0.0183053	-0.188298	180.336	-1.8452	0.545194	-3.38448	0.000713122	0.00880585
BRCA	ENSG00000134323	MYCN	cg17360299	chr2:15941910	CGI:chr2:15939679-15942910	gene body,promoter	0.0620225	0.219894	-2.02406	0.042964	0.047218	-0.157871	180.336	-1.8452	0.545194	-3.38448	0.000713122	0.00880585
BRCA	ENSG00000171303	KCNK3	cg20491914	chr2:26692481	CGI:chr2:26692577-26693683	promoter	0.422693	0.648731	-2.73094	0.00631533	0.0223289	-0.226038	368.513	-2.85236	0.664034	-4.29551	1.74293e-05	0.000545407
BRCA	ENSG00000138083	SIX3	cg23808946	chr2:44942409	CGI:chr2:44942366-44944745	gene body,CDS,exon,promoter	0.250005	0.419499	-2.06211	0.0391972	0.0455894	-0.169493	157.412	-2.44448	0.800266	-3.05458	0.00225374	0.0202565
BRCA	ENSG00000003137	CYP26B1	cg20097440	chr2:72147840	CGI:chr2:72143992-72150046	gene body,UTR,exon,promoter	0.126131	0.280695	-2.8129	0.00490967	0.0201811	-0.154563	352.602	-1.22818	0.407219	-3.01602	0.00256116	0.0222365
BRCA	ENSG00000172005	MAL	cg22762844	chr2:95026679	CGI:chr2:95025112-95026686	gene body,promoter	0.102294	0.279639	-2.34604	0.0189743	0.0342484	-0.177344	80.9308	-2.41359	0.556791	-4.33483	1.45875e-05	0.000476246
BRCA	ENSG00000163064	EN1	cg07529575	chr2:118846694	CGI:chr2:118845040-118848010	gene body,CDS,exon,promoter	0.178797	0.362132	-2.65191	0.00800372	0.0245414	-0.183335	943.29	-3.2112	0.693179	-4.63257	3.61154e-06	0.000167179
BRCA	ENSG00000163064	EN1	cg06704122	chr2:118847126	CGI:chr2:118845040-118848010	gene body,CDS,exon,promoter	0.235894	0.46987	-2.5319	0.0113445	0.027999	-0.233977	943.29	-3.2112	0.693179	-4.63257	3.61154e-06	0.000167179
BRCA	ENSG00000163064	EN1	cg20804050	chr2:118847865	CGI:chr2:118845040-118848010	promoter	0.319807	0.530031	-2.51727	0.0118269	0.0284188	-0.210223	943.29	-3.2112	0.693179	-4.63257	3.61154e-06	0.000167179
BRCA	ENSG00000163064	EN1	cg26990102	chr2:118849170	CGI:chr2:118848993-118849250	promoter	0.364195	0.596405	-2.32994	0.0198095	0.0348131	-0.232209	943.29	-3.2112	0.693179	-4.63257	3.61154e-06	0.000167179
BRCA	ENSG00000197635	DPP4	cg18892517	chr2:162073734	CGI:chr2:162073723-162074369	gene body,promoter	0.277267	0.433089	-2.13529	0.0327375	0.042455	-0.155822	661.784	-1.59645	0.384875	-4.14796	3.35455e-05	0.000889305
BRCA	ENSG00000204335	SP5	cg01571735	chr2:170716390	CGI:chr2:170713367-170717394	gene body,CDS,exon,promoter	0.12467	0.270077	-1.9743	0.0483477	0.0493077	-0.145407	129.937	-2.83503	0.686825	-4.12773	3.66358e-05	0.000947336
BRCA	ENSG00000115596	WNT6	cg02175741	chr2:218860168	CGI:chr2:218858979-218860287	gene body,promoter	0.0841327	0.216196	-2.41629	0.0156798	0.0318166	-0.132063	112.581	-3.78808	0.709708	-5.33752	9.42271e-08	9.84591e-06
BRCA	ENSG00000168918	INPP5D	cg23553480	chr2:233060565	CGI:chr2:233060381-233060608	gene body,CDS,exon,promoter	0.631277	0.736119	-2.33872	0.01935	0.0345017	-0.104842	1637.22	-1.02926	0.285674	-3.60292	0.000314658	0.00496233
BRCA	ENSG00000130294	KIF1A	cg03896836	chr2:240820608	CGI:chr2:240818724-240821366	promoter	0.114105	0.334459	-2.41482	0.0157429	0.0318617	-0.220354	1095.14	-5.91056	0.854211	-6.91933	4.53801e-12	4.05425e-09
BRCA	ENSG00000130294	KIF1A	cg26084005	chr2:240820773	CGI:chr2:240818724-240821366	promoter	0.0625098	0.268978	-3.17586	0.00149395	0.0117454	-0.206468	1095.14	-5.91056	0.854211	-6.91933	4.53801e-12	4.05425e-09
BRCA	ENSG00000130294	KIF1A	cg23302603	chr2:240821092	CGI:chr2:240818724-240821366	promoter	0.164647	0.426437	-2.9856	0.00283025	0.0160385	-0.26179	1095.14	-5.91056	0.854211	-6.91933	4.53801e-12	4.05425e-09
BRCA	ENSG00000157765	SLC34A2	cg19766441	chr4:25655743	CGI:chr4:25655497-25655925	gene body,promoter	0.220282	0.425094	-1.9743	0.0483477	0.0493077	-0.204812	2658.63	-4.77878	0.764324	-6.2523	4.04457e-10	1.36356e-07
BRCA	ENSG00000145284	SCD5	cg20740157	chr4:82799476	CGI:chr4:82797856-82799088	promoter	0.43399	0.673727	-2.08845	0.0367568	0.0444325	-0.239737	1123.13	-1.0493	0.394752	-2.65813	0.00785747	0.0488849
BRCA	ENSG00000184956	MUC6	cg06508454	chr11:1036471	CGI:chr11:1036420-1036827	gene body,promoter	0.778983	0.917787	-2.61972	0.00880032	0.0254407	-0.138804	2648.61	-7.69998	0.9668	-7.9644	1.66027e-15	2.28198e-12
BRCA	ENSG00000184956	MUC6	cg26226988	chr11:1037923	CGI:chr11:1036420-1036827	promoter	0.582514	0.328773	3.12463	0.00178027	0.0128265	0.253741	2648.61	-7.69998	0.9668	-7.9644	1.66027e-15	2.28198e-12
BRCA	ENSG00000184937	WT1	cg21548155	chr11:32434794	CGI:chr11:32433328-32435765	gene body,CDS,exon,promoter	0.293635	0.559793	-3.04414	0.00233348	0.0146666	-0.266159	333.905	-4.66123	0.751537	-6.20226	5.5659e-10	1.69511e-07
BRCA	ENSG00000184937	WT1	cg19074340	chr11:32435366	CGI:chr11:32433328-32435765	gene body,UTR,exon,promoter	0.233016	0.47033	-2.74704	0.00601354	0.0219334	-0.237314	333.905	-4.66123	0.751537	-6.20226	5.5659e-10	1.69511e-07
BRCA	ENSG00000184937	WT1	cg07193766	chr11:32435581	CGI:chr11:32433328-32435765	gene body,UTR,exon,promoter	0.15613	0.33961	-2.46165	0.0138298	0.0302513	-0.18348	333.905	-4.66123	0.751537	-6.20226	5.5659e-10	1.69511e-07
BRCA	ENSG00000184937	WT1	cg19570244	chr11:32435612	CGI:chr11:32433328-32435765	gene body,UTR,exon,promoter	0.250087	0.512268	-2.99292	0.00276327	0.0158683	-0.26218	333.905	-4.66123	0.751537	-6.20226	5.5659e-10	1.69511e-07
BRCA	ENSG00000184937	WT1	cg19126300	chr11:32435616	CGI:chr11:32433328-32435765	gene body,UTR,exon,promoter	0.319592	0.592367	-3.0295	0.00244956	0.0150336	-0.272774	333.905	-4.66123	0.751537	-6.20226	5.5659e-10	1.69511e-07
BRCA	ENSG00000184937	WT1	cg13450005	chr11:32435711	CGI:chr11:32433328-32435765	promoter	0.169971	0.375737	-2.31237	0.0207571	0.0354866	-0.205766	333.905	-4.66123	0.751537	-6.20226	5.5659e-10	1.69511e-07
BRCA	ENSG00000184937	WT1	cg26232818	chr11:32435840	CGI:chr11:32433328-32435765	promoter	0.201886	0.388789	-2.33579	0.0195021	0.0345869	-0.186903	333.905	-4.66123	0.751537	-6.20226	5.5659e-10	1.69511e-07
BRCA	ENSG00000166016	ABTB2	cg20211779	chr11:34357374	CGI:chr11:34356682-34358176	gene body,CDS,exon,promoter	0.102265	0.249384	-2.63435	0.00842984	0.0250331	-0.147119	675.333	-1.08347	0.390557	-2.77416	0.00553446	0.0385085
BRCA	ENSG00000135374	ELF5	cg19656820	chr11:34513538	CGI:chr11:34438618-34439310	gene body,promoter	0.678211	0.84133	-2.46604	0.0136614	0.0300834	-0.163119	2278.12	-4.21107	0.762143	-5.5253	3.28932e-08	4.35359e-06
BRCA	ENSG00000135374	ELF5	cg22932313	chr11:34513642	CGI:chr11:34438618-34439310	gene body,promoter	0.681617	0.876795	-2.60069	0.00930366	0.0259602	-0.195178	2278.12	-4.21107	0.762143	-5.5253	3.28932e-08	4.35359e-06
BRCA	ENSG00000156689	GLYATL2	cg26379859	chr11:58905415	CGI:chr11:58905378-58905815	promoter	0.187415	0.0267059	2.61679	0.00887614	0.0255309	0.160709	1514.37	-3.74152	0.731451	-5.11519	3.13419e-07	2.47795e-05
BRCA	ENSG00000084207	GSTP1	cg06928838	chr11:67584019	CGI:chr11:67583457-67584482	gene body,promoter	0.214121	0.425761	-2.40604	0.0161265	0.0321627	-0.21164	11467.3	-1.93975	0.417204	-4.64941	3.32882e-06	0.00015777
BRCA	ENSG00000069482	GAL	cg22370235	chr11:68684384	CGI:chr11:68683891-68685378	gene body,exon,promoter	0.0496382	0.165525	-2.04894	0.040468	0.0461814	-0.115887	193.3	-1.98411	0.655786	-3.02554	0.00248187	0.0217596
BRCA	ENSG00000085741	WNT11	cg22947532	chr11:76210896	CGI:chr11:76206227-76211040	promoter	0.111126	0.296883	-2.92413	0.00345421	0.0175677	-0.185757	372.801	-2.9271	0.569571	-5.13914	2.76005e-07	2.2519e-05
BRCA	ENSG00000088836	SLC4A11	cg01996714	chr20:3240193	CGI:chr20:3237932-3240284	promoter	0.192027	0.366769	-2.24505	0.0247648	0.037944	-0.174741	589.045	-1.33397	0.464328	-2.87291	0.00406709	0.0307406
BRCA	ENSG00000089199	CHGB	cg23432201	chr20:5911445	CGI:chr20:5911232-5911771	gene body,UTR,exon,promoter	0.205401	0.393669	-2.21871	0.0265065	0.0389714	-0.188268	728.008	-7.17798	1.05823	-6.78302	1.1769e-11	8.08804e-09
BRCA	ENSG00000101311	FERMT1	cg09818171	chr20:6122982	CGI:chr20:6122789-6123323	gene body,UTR,exon,promoter	0.109551	0.324636	-2.54654	0.0108797	0.027542	-0.215085	359.594	-3.34072	0.6264	-5.3332	9.64948e-08	9.93691e-06
BRCA	ENSG00000101230	ISM1	cg25796439	chr20:13220292	CGI:chr20:13220023-13221969	promoter	0.257796	0.417178	-2.16309	0.0305339	0.0412722	-0.159383	638.311	-1.21535	0.375001	-3.24094	0.00119138	0.0129094
BRCA	ENSG00000101230	ISM1	cg14060111	chr20:13220297	CGI:chr20:13220023-13221969	promoter	0.298227	0.465205	-2.09577	0.0361024	0.0441377	-0.166978	638.311	-1.21535	0.375001	-3.24094	0.00119138	0.0129094
BRCA	ENSG00000101230	ISM1	cg12664209	chr20:13220307	CGI:chr20:13220023-13221969	promoter	0.27373	0.419725	-1.99333	0.0462258	0.0485232	-0.145994	638.311	-1.21535	0.375001	-3.24094	0.00119138	0.0129094
BRCA	ENSG00000101445	PPP1R16B	cg10305789	chr20:38805524	CGI:chr20:38805563-38806949	promoter	0.551769	0.717829	-3.08073	0.00206496	0.0138386	-0.16606	696.466	-1.24823	0.381996	-3.26766	0.00108439	0.0120272
BRCA	ENSG00000101445	PPP1R16B	cg25932164	chr20:38806307	CGI:chr20:38805563-38806949	gene body,promoter	0.0644669	0.184983	-2.66655	0.00766346	0.0241424	-0.120516	696.466	-1.24823	0.381996	-3.26766	0.00108439	0.0120272
BRCA	ENSG00000100979	PLTP	cg09863247	chr20:45911327	CGI:chr20:45911806-45912318	gene body,promoter	0.442722	0.643457	-2.49092	0.0127411	0.0292283	-0.200735	4266.69	-1.00467	0.326513	-3.07697	0.0020912	0.0192407
BRCA	ENSG00000177283	FZD8	cg18768157	chr10:35641606	CGI:chr10:35639382-35642965	gene body,UTR,exon,promoter	0.0419177	0.145091	-2.27579	0.0228588	0.0368071	-0.103174	1305.67	-1.52079	0.391356	-3.88596	0.000101927	0.00210304
BRCA	ENSG00000204175	GPRIN2	cg13722700	chr10:46556114	CGI:chr10:46556321-46557169	promoter	0.699463	0.912698	-2.63289	0.00846625	0.0250634	-0.213235	179.981	-2.53257	0.61715	-4.10365	4.06688e-05	0.00102348
BRCA	ENSG00000204175	GPRIN2	cg12573115	chr10:46556074	CGI:chr10:46556321-46557169	promoter	0.584773	0.706413	-2.2392	0.025143	0.0381569	-0.12164	179.981	-2.53257	0.61715	-4.10365	4.06688e-05	0.00102348
BRCA	ENSG00000165655	ZNF503	cg25561913	chr10:75401371	CGI:chr10:75395370-75409842	gene body,CDS,exon,promoter	0.139899	0.305439	-1.98747	0.0468702	0.048767	-0.16554	787.573	-1.56963	0.412435	-3.80577	0.000141365	0.00268715
BRCA	ENSG00000095713	CRTAC1	cg15286044	chr10:98030214	CGI:chr10:98029857-98031391	gene body,promoter	0.24195	0.527687	-2.89632	0.00377564	0.0181952	-0.285737	173.898	-3.5545	0.596196	-5.96197	2.49216e-09	5.78311e-07
BRCA	ENSG00000095713	CRTAC1	cg23335460	chr10:98030836	CGI:chr10:98029857-98031391	promoter	0.342161	0.526743	-2.54508	0.0109254	0.0275899	-0.184583	173.898	-3.5545	0.596196	-5.96197	2.49216e-09	5.78311e-07
BRCA	ENSG00000099194	SCD	cg06400428	chr10:100347909	CGI:chr10:100346425-100347965	gene body,promoter	0.223082	0.0477245	3.11585	0.00183415	0.0130588	0.175358	44253.7	1.19926	0.416432	2.87986	0.00397856	0.0302249
BRCA	ENSG00000099194	SCD	cg03440556	chr10:100348000	CGI:chr10:100346425-100347965	gene body,promoter	0.296703	0.0826277	3.53296	0.000410939	0.00524149	0.214076	44253.7	1.19926	0.416432	2.87986	0.00397856	0.0302249
BRCA	ENSG00000151640	DPYSL4	cg01261798	chr10:132186530	CGI:chr10:132185408-132187996	promoter	0.166029	0.426439	-2.09431	0.0362325	0.044187	-0.260411	236.614	-2.19247	0.497206	-4.40958	1.03573e-05	0.000373868
BRCA	ENSG00000151640	DPYSL4	cg08753373	chr10:132186620	CGI:chr10:132185408-132187996	promoter	0.217344	0.448887	-2.45434	0.0141145	0.0304808	-0.231543	236.614	-2.19247	0.497206	-4.40958	1.03573e-05	0.000373868
BRCA	ENSG00000134762	DSC3	cg11722699	chr18:31042847	CGI:chr18:31041523-31043151	promoter	0.148488	0.28489	-1.98308	0.0473584	0.0489601	-0.136402	1722.21	-3.66035	0.694201	-5.27276	1.34386e-07	1.27595e-05
BRCA	ENSG00000206075	SERPINB5	cg21807034	chr18:63476917	CGI:chr18:63422029-63423124	gene body,UTR,exon,promoter	0.365608	0.248564	2.29481	0.0217439	0.0361217	0.117043	1795.32	-4.3259	0.693704	-6.23595	4.49041e-10	1.45881e-07
BRCA	ENSG00000160191	PDE9A	cg17263892	chr21:42654343	CGI:chr21:42653759-42654540	gene body,promoter	0.0613654	0.273861	-3.74517	0.000180273	0.00276608	-0.212495	570.392	-1.30094	0.412279	-3.15548	0.00160232	0.0158881
BRCA	ENSG00000205710	C17orf107	cg00744351	chr17:4901079	CGI:chr17:4898970-4902107	gene body,UTR,exon,promoter	0.762581	0.879143	-2.72363	0.00645696	0.0225522	-0.116563	304.822	-1.35669	0.32972	-4.11467	3.87735e-05	0.00098972
BRCA	ENSG00000125430	HS3ST3B1	cg01971137	chr17:14299872	CGI:chr17:14299315-14299941	promoter	0.201681	0.437842	-2.34896	0.0188258	0.0341719	-0.236161	317.7	-1.31376	0.32281	-4.06975	4.70635e-05	0.00114257
BRCA	ENSG00000172716	SLFN11	cg05504685	chr17:35373494	CGI:chr17:35373468-35373741	gene body,UTR,exon,promoter	0.327952	0.470508	-2.28018	0.0225972	0.0366413	-0.142556	1640.75	-1.04882	0.273927	-3.82884	0.000128749	0.00250598
BRCA	ENSG00000172716	SLFN11	cg14380270	chr17:35373728	CGI:chr17:35373468-35373741	promoter	0.244495	0.605467	-3.47588	0.000509181	0.00613803	-0.360972	1640.75	-1.04882	0.273927	-3.82884	0.000128749	0.00250598
BRCA	ENSG00000172716	SLFN11	cg18608369	chr17:35373740	CGI:chr17:35373468-35373741	promoter	0.163531	0.449801	-3.57394	0.000351655	0.00468333	-0.28627	1640.75	-1.04882	0.273927	-3.82884	0.000128749	0.00250598
BRCA	ENSG00000172716	SLFN11	cg05224998	chr17:35373782	CGI:chr17:35373468-35373741	promoter	0.143123	0.32436	-2.96364	0.00304019	0.016545	-0.181237	1640.75	-1.04882	0.273927	-3.82884	0.000128749	0.00250598
BRCA	ENSG00000172716	SLFN11	cg03668718	chr17:35374331	CGI:chr17:35373970-35374638	promoter	0.231341	0.486192	-2.9051	0.00367132	0.018006	-0.254851	1640.75	-1.04882	0.273927	-3.82884	0.000128749	0.00250598
BRCA	ENSG00000172716	SLFN11	cg11309496	chr17:35374334	CGI:chr17:35373970-35374638	promoter	0.197821	0.382159	-2.26993	0.0232117	0.0370114	-0.184338	1640.75	-1.04882	0.273927	-3.82884	0.000128749	0.00250598
BRCA	ENSG00000141750	STAC2	cg14328457	chr17:39225222	CGI:chr17:39224700-39226110	gene body,promoter	0.434533	0.713348	-3.59443	0.000325109	0.00441942	-0.278815	2417.71	-4.39563	0.785756	-5.59414	2.21714e-08	3.27404e-06
BRCA	ENSG00000141750	STAC2	cg10694741	chr17:39225908	CGI:chr17:39224700-39226110	promoter	0.105254	0.233601	-2.54068	0.0110636	0.0277245	-0.128347	2417.71	-4.39563	0.785756	-5.59414	2.21714e-08	3.27404e-06
BRCA	ENSG00000141750	STAC2	cg07280482	chr17:39225920	CGI:chr17:39224700-39226110	promoter	0.1838	0.319914	-1.96259	0.0496937	0.0497933	-0.136114	2417.71	-4.39563	0.785756	-5.59414	2.21714e-08	3.27404e-06
BRCA	ENSG00000131096	PYY	cg10172783	chr17:44004668	CGI:chr17:44004659-44007604	promoter	0.507196	0.665313	-2.20846	0.0272119	0.0393545	-0.158117	70.9983	2.2943	0.668204	3.43353	0.00059577	0.00772513
BRCA	ENSG00000161653	NAGS	cg10172783	chr17:44004668	CGI:chr17:44004659-44007604	gene body,CDS,exon,promoter	0.507196	0.665313	-2.20846	0.0272119	0.0393545	-0.158117	331.867	1.6753	0.393701	4.25527	2.08797e-05	0.000628079
BRCA	ENSG00000131096	PYY	cg21144462	chr17:44005279	CGI:chr17:44004659-44007604	promoter	0.46936	0.623262	-2.70314	0.00686885	0.0230855	-0.153902	70.9983	2.2943	0.668204	3.43353	0.00059577	0.00772513
BRCA	ENSG00000161653	NAGS	cg21144462	chr17:44005279	CGI:chr17:44004659-44007604	gene body,promoter	0.46936	0.623262	-2.70314	0.00686885	0.0230855	-0.153902	331.867	1.6753	0.393701	4.25527	2.08797e-05	0.000628079
BRCA	ENSG00000131096	PYY	cg05951576	chr17:44005896	CGI:chr17:44004659-44007604	promoter	0.349294	0.604192	-2.52898	0.0114396	0.0280928	-0.254897	70.9983	2.2943	0.668204	3.43353	0.00059577	0.00772513
BRCA	ENSG00000161653	NAGS	cg05951576	chr17:44005896	CGI:chr17:44004659-44007604	gene body,CDS,exon,promoter	0.349294	0.604192	-2.52898	0.0114396	0.0280928	-0.254897	331.867	1.6753	0.393701	4.25527	2.08797e-05	0.000628079
BRCA	ENSG00000159184	HOXB13	cg17457986	chr17:48728694	CGI:chr17:48728191-48728786	gene body,UTR,exon,promoter	0.235803	0.535033	-2.13382	0.0328572	0.0425155	-0.29923	342.589	-5.29737	1.0324	-5.13113	2.88011e-07	2.32859e-05
BRCA	ENSG00000064300	NGFR	cg21139392	chr17:49495654	CGI:chr17:49494983-49497954	gene body,promoter	0.0997704	0.293586	-2.79095	0.00525539	0.0207845	-0.193815	884.901	-1.72251	0.489324	-3.52019	0.000431241	0.00613978
BRCA	ENSG00000064300	NGFR	cg12082598	chr17:49495868	CGI:chr17:49494983-49497954	gene body,promoter	0.0923709	0.285851	-2.61386	0.00895254	0.0256077	-0.19348	884.901	-1.72251	0.489324	-3.52019	0.000431241	0.00613978
BRCA	ENSG00000108924	HLF	cg15833843	chr17:55263882	CGI:chr17:55264837-55265673	promoter	0.583491	0.69745	-2.30067	0.0214105	0.0358928	-0.113959	493.058	-1.35626	0.461918	-2.93616	0.00332307	0.0266263
BRCA	ENSG00000007312	CD79B	cg08355301	chr17:63932291	CGI:chr17:63941663-63941959	gene body,UTR,exon,promoter	0.680233	0.798615	-2.52459	0.0115835	0.0282217	-0.118382	392.33	-1.8342	0.491758	-3.72987	0.000191577	0.00340268
BRCA	ENSG00000069188	SDK2	cg11521467	chr17:73644160	CGI:chr17:73642889-73645531	promoter	0.0572143	0.241311	-2.10163	0.035586	0.0439176	-0.184096	705.149	2.4657	0.535159	4.60741	4.07708e-06	0.000184429
BRCA	ENSG00000069188	SDK2	cg14275738	chr17:73644201	CGI:chr17:73642889-73645531	promoter	0.0535585	0.216451	-2.2831	0.0224242	0.0365351	-0.162893	705.149	2.4657	0.535159	4.60741	4.07708e-06	0.000184429
BRCA	ENSG00000183048	SLC25A10	cg17913115	chr17:81713033	CGI:chr17:81711906-81712731	gene body,promoter	0.243532	0.10259	3.47881	0.000503652	0.00609222	0.140942	1477.3	1.1877	0.279982	4.24208	2.21455e-05	0.000661698
BRCA	ENSG00000141579	ZNF750	cg07114009	chr17:82840072	CGI:chr17:82832492-82832705	gene body,UTR,exon,promoter	0.369412	0.228584	3.1539	0.00161103	0.0121921	0.140828	522.962	-1.3408	0.383955	-3.49208	0.000479266	0.00657992
BRCA	ENSG00000141579	ZNF750	cg03854913	chr17:82840192	CGI:chr17:82832492-82832705	gene body,UTR,exon,promoter	0.431519	0.26578	3.29733	0.000976091	0.00929806	0.165739	522.962	-1.3408	0.383955	-3.49208	0.000479266	0.00657992
BRCA	ENSG00000078399	HOXA9	cg13703049	chr7:27173991	CGI:chr7:27172797-27174777	gene body,promoter	0.346422	0.615252	-3.21976	0.00128297	0.0108687	-0.26883	202.762	-1.75486	0.519423	-3.37847	0.000728901	0.00892055
BRCA	ENSG00000078399	HOXA9	cg14625175	chr7:27174437	CGI:chr7:27172797-27174777	gene body,promoter	0.478105	0.665909	-2.44116	0.01464	0.0309764	-0.187804	202.762	-1.75486	0.519423	-3.37847	0.000728901	0.00892055
BRCA	ENSG00000185811	IKZF1	cg16697214	chr7:50303765	CGI:chr7:50303299-50304923	promoter	0.260037	0.481483	-2.77778	0.00547323	0.021149	-0.221446	1135.6	-1.31921	0.354134	-3.72518	0.000195177	0.00344215
BRCA	ENSG00000185811	IKZF1	cg18607529	chr7:50304273	CGI:chr7:50303299-50304923	gene body,exon,promoter	0.183995	0.41689	-3.11292	0.00185243	0.0131206	-0.232895	1135.6	-1.31921	0.354134	-3.72518	0.000195177	0.00344215
BRCA	ENSG00000185811	IKZF1	cg07589773	chr7:50304287	CGI:chr7:50303299-50304923	gene body,exon,promoter	0.276034	0.534931	-3.07195	0.00212668	0.0140443	-0.258897	1135.6	-1.31921	0.354134	-3.72518	0.000195177	0.00344215
BRCA	ENSG00000185811	IKZF1	cg20078466	chr7:50304735	CGI:chr7:50303299-50304923	gene body,UTR,exon,promoter	0.178823	0.504618	-3.34563	0.000820972	0.00838065	-0.325795	1135.6	-1.31921	0.354134	-3.72518	0.000195177	0.00344215
BRCA	ENSG00000105810	CDK6	cg04557695	chr7:92836853	CGI:chr7:92832887-92837073	promoter	0.225222	0.494939	-2.80558	0.00502256	0.020417	-0.269717	2232.25	-1.85283	0.405695	-4.56704	4.94656e-06	0.000211448
BRCA	ENSG00000105810	CDK6	cg19176453	chr7:92837017	CGI:chr7:92832887-92837073	promoter	0.180972	0.367152	-2.8451	0.00443977	0.0193921	-0.18618	2232.25	-1.85283	0.405695	-4.56704	4.94656e-06	0.000211448
BRCA	ENSG00000174697	LEP	cg00840332	chr7:128241216	CGI:chr7:128240697-128241322	promoter	0.539432	0.662714	-2.09431	0.0362325	0.044187	-0.123282	307.592	-3.29994	0.79759	-4.13739	3.51271e-05	0.00091882
BRCA	ENSG00000106123	EPHB6	cg07017994	chr7:142855152	CGI:chr7:142854117-142855424	gene body,UTR,exon,promoter	0.0577583	0.321718	-2.60069	0.00930366	0.0259602	-0.26396	534.794	-1.38891	0.488143	-2.84529	0.00443716	0.0328023
BRCA	ENSG00000106123	EPHB6	cg23738624	chr7:142855395	CGI:chr7:142854117-142855424	gene body,promoter	0.060556	0.253881	-2.51873	0.0117778	0.0283834	-0.193325	534.794	-1.38891	0.488143	-2.84529	0.00443716	0.0328023
BRCA	ENSG00000055118	KCNH2	cg23522427	chr7:150978220	CGI:chr7:150977649-150978330	gene body,UTR,exon,promoter	0.0413777	0.196683	-2.06943	0.0385059	0.0452697	-0.155306	350.685	-1.80032	0.58891	-3.05705	0.0022353	0.0201719
BRCA	ENSG00000128268	MGAT3	cg03377355	chr22:39457880	CGI:chr22:39456200-39457987	gene body,promoter	0.15256	0.394272	-2.66069	0.00779797	0.0242965	-0.241712	386.323	-1.67678	0.446446	-3.75585	0.000172752	0.00313227
BRCA	ENSG00000130487	KLHDC7B	cg07600533	chr22:50547602	CGI:chr22:50546543-50549712	promoter	0.742312	0.87085	-2.05626	0.0397577	0.0458758	-0.128538	1054.7	-2.50689	0.614828	-4.07738	4.55465e-05	0.00111178
BRCA	ENSG00000046653	GPM6B	cg01310267	chrX:13938601	CGI:chrX:13938108-13938942	gene body,UTR,exon,promoter	0.24879	0.102934	3.13049	0.00174517	0.012709	0.145856	980.807	-1.16256	0.386473	-3.00812	0.00262866	0.0226903
BRCA	ENSG00000147027	TMEM47	cg11238952	chrX:34656682	CGI:chrX:34656390-34657610	gene body,promoter	0.347388	0.0866712	4.61743	3.88519e-06	9.58786e-05	0.260717	1907.1	-1.16801	0.392131	-2.97862	0.00289545	0.0242668
BRCA	ENSG00000156298	TSPAN7	cg20074774	chrX:38561527	CGI:chrX:38562012-38562225	gene body,UTR,exon,promoter	0.373121	0.111737	3.9925	6.5379e-05	0.00118251	0.261384	598.92	-1.36428	0.375342	-3.63477	0.000278229	0.00453594
BRCA	ENSG00000156298	TSPAN7	cg04345928	chrX:38561530	CGI:chrX:38562012-38562225	gene body,UTR,exon,promoter	0.347423	0.11274	3.96909	7.21481e-05	0.0012733	0.234683	598.92	-1.36428	0.375342	-3.63477	0.000278229	0.00453594
BRCA	ENSG00000147180	ZNF711	cg08950703	chrX:85244017	CGI:chrX:85243766-85244878	promoter	0.465148	0.0970559	4.02178	5.77611e-05	0.00109997	0.368092	541.948	-1.55703	0.415934	-3.74346	0.000181505	0.00325943
BRCA	ENSG00000147180	ZNF711	cg08108619	chrX:85244345	CGI:chrX:85243766-85244878	gene body,promoter	0.38172	0.0341432	5.10771	3.26081e-07	1.20594e-05	0.347577	541.948	-1.55703	0.415934	-3.74346	0.000181505	0.00325943
BRCA	ENSG00000101938	CHRDL1	cg07653640	chrX:110795726	CGI:chrX:110795718-110796142	gene body,UTR,exon,promoter	0.503841	0.132122	4.08763	4.35795e-05	0.000868943	0.371719	972.297	-2.12175	0.558091	-3.80181	0.000143643	0.00272464
BRCA	ENSG00000101938	CHRDL1	cg19777864	chrX:110795854	CGI:chrX:110795718-110796142	promoter	0.206414	0.0577043	3.22854	0.00124422	0.010703	0.14871	972.297	-2.12175	0.558091	-3.80181	0.000143643	0.00272464
BRCA	ENSG00000101938	CHRDL1	cg16637019	chrX:110796121	CGI:chrX:110795718-110796142	promoter	0.385037	0.0660515	5.04771	4.4714e-07	1.47671e-05	0.318985	972.297	-2.12175	0.558091	-3.80181	0.000143643	0.00272464
BRCA	ENSG00000101938	CHRDL1	cg07051329	chrX:110796141	CGI:chrX:110795718-110796142	promoter	0.277321	0.059748	4.78427	1.71607e-06	4.60848e-05	0.217573	972.297	-2.12175	0.558091	-3.80181	0.000143643	0.00272464
BRCA	ENSG00000204019	CT83	cg17155263	chrX:116462885	CGI:chrX:115968702-115969064	gene body,UTR,exon,promoter	0.66299	0.795307	-2.3797	0.0173269	0.0330745	-0.132317	73.7965	-23.527	2.2583	-10.418	2.0517e-25	4.58247e-22
BRCA	ENSG00000003096	KLHL13	cg08447449	chrX:118116980	CGI:chrX:118116270-118117066	gene body,promoter	0.282775	0.0122657	5.16333	2.42598e-07	1.15791e-05	0.270509	494.232	-1.8865	0.462184	-4.08172	4.47041e-05	0.00110175
BRCA	ENSG00000003096	KLHL13	cg04029664	chrX:118116999	CGI:chrX:118116270-118117066	gene body,promoter	0.407176	0.034062	5.1004	3.38944e-07	1.22842e-05	0.373114	494.232	-1.8865	0.462184	-4.08172	4.47041e-05	0.00110175
BRCA	ENSG00000003096	KLHL13	cg21918369	chrX:118117005	CGI:chrX:118116270-118117066	gene body,promoter	0.308715	0.033842	4.93063	8.19664e-07	2.4184e-05	0.274873	494.232	-1.8865	0.462184	-4.08172	4.47041e-05	0.00110175
BRCA	ENSG00000182195	LDOC1	cg22970017	chrX:141176316	CGI:chrX:141176765-141177220	gene body,UTR,exon,promoter	0.339318	0.168481	3.57101	0.000355609	0.0047219	0.170837	3316.47	1.42679	0.295479	4.82873	1.37408e-06	7.76962e-05
BRCA	ENSG00000182195	LDOC1	cg16697940	chrX:141177136	CGI:chrX:141176765-141177220	promoter	0.286386	0.0256078	5.05649	4.27044e-07	1.42581e-05	0.260778	3316.47	1.42679	0.295479	4.82873	1.37408e-06	7.76962e-05
BRCA	ENSG00000013619	MAMLD1	cg09597400	chrX:150362619	CGI:chrX:150361273-150365823	gene body,promoter	0.453151	0.286199	2.4075	0.016062	0.0321211	0.166951	432.064	-1.10908	0.375051	-2.95714	0.00310508	0.0254386
BRCA	ENSG00000013619	MAMLD1	cg22452543	chrX:150362659	CGI:chrX:150361273-150365823	gene body,promoter	0.509137	0.244655	2.86412	0.00418163	0.0188879	0.264483	432.064	-1.10908	0.375051	-2.95714	0.00310508	0.0254386
BRCA	ENSG00000147381	MAGEA4	cg21045312	chrX:151912497	CGI:chrX:151974208-151974899	promoter	0.798265	0.909834	-3.34563	0.000820972	0.00838065	-0.11157	78.4131	-5.44474	1.81595	-2.99829	0.002715	0.0231669
BRCA	ENSG00000102287	GABRE	cg04929599	chrX:151974390	CGI:chrX:151974208-151974899	gene body,promoter	0.387007	0.243201	2.34165	0.019199	0.0343898	0.143806	618.247	-2.47695	0.587424	-4.21663	2.47982e-05	0.00071812
BRCA	ENSG00000125257	ABCC4	cg25868675	chr13:95300975	CGI:chr13:95301006-95301957	gene body,promoter	0.0550784	0.289198	-2.58459	0.00974946	0.0264086	-0.234119	782.07	-1.45041	0.405246	-3.57909	0.000344796	0.00524771
BRCA	ENSG00000113430	IRX4	cg08569799	chr5:1886714	CGI:chr5:1881810-1887629	gene body,promoter	0.234138	0.524206	-2.38262	0.0171897	0.0329819	-0.290068	197.78	-1.92358	0.658223	-2.92238	0.0034737	0.0275368
BRCA	ENSG00000113430	IRX4	cg07565505	chr5:1887186	CGI:chr5:1881810-1887629	gene body,UTR,exon,promoter	0.416436	0.62613	-2.52751	0.0114874	0.0281472	-0.209694	197.78	-1.92358	0.658223	-2.92238	0.0034737	0.0275368
BRCA	ENSG00000170549	IRX1	cg10530883	chr5:3596093	CGI:chr5:3594353-3603136	gene body,UTR,exon,promoter	0.479439	0.631278	-1.98015	0.0476863	0.0490657	-0.151839	597.631	-3.27918	0.637621	-5.14283	2.70631e-07	2.21818e-05
BRCA	ENSG00000184838	PRR16	cg12453014	chr5:120465447	CGI:chr5:120464126-120464373	gene body,promoter	0.165012	0.367229	-2.83778	0.00454283	0.019583	-0.202216	176.9	-1.09178	0.386248	-2.82662	0.00470415	0.0343697
BRCA	ENSG00000184838	PRR16	cg26464221	chr5:120465736	CGI:chr5:120464126-120464373	gene body,promoter	0.123266	0.339062	-2.4558	0.0140571	0.0304551	-0.215796	176.9	-1.09178	0.386248	-2.82662	0.00470415	0.0343697
BRCA	ENSG00000134516	DOCK2	cg08862890	chr5:169637447	CGI:chr5:169637266-169637698	gene body,promoter	0.440631	0.619318	-2.02552	0.0428137	0.0471456	-0.178686	1469.16	-1.08732	0.316464	-3.43585	0.000590705	0.00767616
BRCA	ENSG00000168269	FOXI1	cg16087093	chr5:170106343	CGI:chr5:170106076-170106530	gene body,CDS,exon,promoter	0.631805	0.831881	-2.53922	0.01111	0.0277608	-0.200076	817.235	-2.39655	0.709588	-3.37738	0.000731802	0.00894993
BRCA	ENSG00000113763	UNC5A	cg13928709	chr5:176810220	CGI:chr5:176809760-176811080	promoter	0.152058	0.428156	-2.36067	0.0182419	0.0337655	-0.276098	536.108	-1.80309	0.574619	-3.13788	0.00170172	0.0166428
BRCA	ENSG00000160867	FGFR4	cg11408622	chr5:177087004	CGI:chr5:177086650-177087432	gene body,UTR,exon,promoter	0.0249641	0.16524	-2.38848	0.0169183	0.0327605	-0.140276	1212.52	-2.88563	0.557933	-5.172	2.31607e-07	1.98959e-05
BRCA	ENSG00000160867	FGFR4	cg21042539	chr5:177087084	CGI:chr5:177086650-177087432	gene body,promoter	0.0308501	0.195427	-1.96991	0.0488488	0.0494932	-0.164577	1212.52	-2.88563	0.557933	-5.172	2.31607e-07	1.98959e-05
BRCA	ENSG00000234284	ZNF879	cg17861295	chr5:179023762	CGI:chr5:179023629-179024215	gene body,UTR,exon,promoter	0.081772	0.386823	-2.81729	0.00484305	0.0200698	-0.305051	261.689	-1.14874	0.255377	-4.49821	6.85289e-06	0.00027332
BRCA	ENSG00000177932	ZNF354C	cg12623648	chr5:179060383	CGI:chr5:179060145-179060920	promoter	0.037801	0.144756	-2.25091	0.0243915	0.0377206	-0.106955	437.385	-1.29895	0.282355	-4.60041	4.21653e-06	0.000188825
BRCA	ENSG00000177932	ZNF354C	cg10802132	chr5:179060499	CGI:chr5:179060145-179060920	gene body,UTR,exon,promoter	0.134689	0.489885	-3.80956	0.000139212	0.00222103	-0.355196	437.385	-1.29895	0.282355	-4.60041	4.21653e-06	0.000188825
BRCA	ENSG00000161055	SCGB3A1	cg19897330	chr5:180591201	CGI:chr5:180590099-180592062	gene body,promoter	0.307123	0.629022	-2.97243	0.00295457	0.0163501	-0.321899	394.737	-3.81965	0.773273	-4.93958	7.82908e-07	5.06848e-05
BRCA	ENSG00000161055	SCGB3A1	cg22859061	chr5:180591503	CGI:chr5:180590099-180592062	gene body,UTR,exon,promoter	0.357144	0.648437	-3.34709	0.00081665	0.00836074	-0.291292	394.737	-3.81965	0.773273	-4.93958	7.82908e-07	5.06848e-05
BRCA	ENSG00000161055	SCGB3A1	cg01934626	chr5:180591562	CGI:chr5:180590099-180592062	promoter	0.369723	0.685262	-3.44515	0.000570752	0.00662508	-0.31554	394.737	-3.81965	0.773273	-4.93958	7.82908e-07	5.06848e-05
BRCA	ENSG00000102854	MSLN	cg04145621	chr16:643166	CGI:chr16:641597-642700	promoter	0.638837	0.506364	2.07821	0.03769	0.0448626	0.132473	1137.11	-5.09904	0.856271	-5.95493	2.60181e-09	5.96015e-07
BRCA	ENSG00000103260	METRN	cg11027330	chr16:714794	CGI:chr16:714748-715994	promoter	0.304525	0.18779	3.03243	0.00242593	0.0149626	0.116735	3481.72	1.27407	0.404377	3.1507	0.00162881	0.0160882
BRCA	ENSG00000103254	FAM173A	cg10254923	chr16:719848	CGI:chr16:720620-722158	promoter	0.378035	0.23084	3.44222	0.000576965	0.00667521	0.147195	889.845	1.36919	0.330146	4.14721	3.3655e-05	0.000890886
BRCA	ENSG00000005513	SOX8	cg22904679	chr16:981428	CGI:chr16:979878-985327	promoter	0.15471	0.273859	-2.23773	0.0252384	0.038215	-0.119149	255.217	-3.32514	0.672615	-4.9436	7.66943e-07	4.98318e-05
BRCA	ENSG00000005513	SOX8	cg21530890	chr16:982260	CGI:chr16:979878-985327	gene body,CDS,exon,promoter	0.308033	0.576537	-3.47588	0.000509181	0.00613803	-0.268504	255.217	-3.32514	0.672615	-4.9436	7.66943e-07	4.98318e-05
BRCA	ENSG00000005513	SOX8	cg02268569	chr16:982713	CGI:chr16:979878-985327	gene body,exon,promoter	0.400843	0.523857	-2.72509	0.00642841	0.0225065	-0.123013	255.217	-3.32514	0.672615	-4.9436	7.66943e-07	4.98318e-05
BRCA	ENSG00000005513	SOX8	cg04124636	chr16:983408	CGI:chr16:979878-985327	gene body,exon,promoter	0.410669	0.284022	2.75729	0.00582832	0.0216733	0.126647	255.217	-3.32514	0.672615	-4.9436	7.66943e-07	4.98318e-05
BRCA	ENSG00000179583	CIITA	cg26239233	chr16:10876944	CGI:chr16:10878925-10879448	promoter	0.215191	0.103145	2.70021	0.00692958	0.023171	0.112046	1684.72	-1.31682	0.352475	-3.73592	0.000187028	0.00333847
BRCA	ENSG00000179583	CIITA	cg08985333	chr16:10877103	CGI:chr16:10878925-10879448	promoter	0.274232	0.163442	3.19488	0.00139888	0.0113318	0.11079	1684.72	-1.31682	0.352475	-3.73592	0.000187028	0.00333847
BRCA	ENSG00000048462	TNFRSF17	cg18676586	chr16:11964977	CGI:chr16:11976400-11977013	promoter	0.444627	0.297679	2.54508	0.0109254	0.0275899	0.146948	104.883	-2.80405	0.603065	-4.64967	3.32467e-06	0.00015777
BRCA	ENSG00000133392	MYH11	cg00359911	chr16:15857373	CGI:chr16:15856982-15857409	promoter	0.0945613	0.261726	-2.57727	0.00995832	0.0266212	-0.167164	4258.65	-1.27943	0.478485	-2.67393	0.00749692	0.0473909
BRCA	ENSG00000133392	MYH11	cg08891096	chr16:15857952	CGI:chr16:15858200-15858566	promoter	0.25713	0.437389	-2.48507	0.0129526	0.0294401	-0.180259	4258.65	-1.27943	0.478485	-2.67393	0.00749692	0.0473909
BRCA	ENSG00000166501	PRKCB	cg24250393	chr16:23835517	CGI:chr16:23835620-23836781	promoter	0.450049	0.598714	-2.70021	0.00692958	0.023171	-0.148665	556.836	-1.96632	0.436261	-4.5072	6.56879e-06	0.000263164
BRCA	ENSG00000166501	PRKCB	cg04279973	chr16:23835647	CGI:chr16:23835620-23836781	promoter	0.408754	0.576567	-2.34896	0.0188258	0.0341719	-0.167813	556.836	-1.96632	0.436261	-4.5072	6.56879e-06	0.000263164
BRCA	ENSG00000166501	PRKCB	cg05436658	chr16:23836247	CGI:chr16:23835620-23836781	gene body,CDS,exon,promoter	0.381988	0.568803	-2.57874	0.00991624	0.0265873	-0.186816	556.836	-1.96632	0.436261	-4.5072	6.56879e-06	0.000263164
BRCA	ENSG00000166501	PRKCB	cg21370856	chr16:23836682	CGI:chr16:23835620-23836781	gene body,promoter	0.453834	0.638704	-2.97096	0.00296868	0.0163876	-0.18487	556.836	-1.96632	0.436261	-4.5072	6.56879e-06	0.000263164
BRCA	ENSG00000103522	IL21R	cg26727816	chr16:27402204	CGI:chr16:27313564-27314374	gene body,UTR,exon,promoter	0.224944	0.383274	-2.32847	0.019887	0.034876	-0.158331	316.419	-1.06632	0.397388	-2.68332	0.00728949	0.046499
BRCA	ENSG00000103522	IL21R	cg16454902	chr16:27402951	CGI:chr16:27313564-27314374	gene body,promoter	0.551437	0.678426	-2.01235	0.0441829	0.0477051	-0.126989	316.419	-1.06632	0.397388	-2.68332	0.00728949	0.046499
BRCA	ENSG00000185905	C16orf54	cg02319067	chr16:29746140	CGI:chr16:29785040-29785436	promoter	0.61782	0.757873	-2.92706	0.00342187	0.0174802	-0.140053	243.598	-1.68307	0.420984	-3.99794	6.3895e-05	0.00145604
BRCA	ENSG00000169900	PYDC1	cg09921810	chr16:31216176	CGI:chr16:31214687-31216943	gene body,promoter	0.0966479	0.224346	-3.00316	0.00267192	0.0156265	-0.127698	390.109	-4.00008	0.896984	-4.45947	8.21622e-06	0.000314646
BRCA	ENSG00000006210	CX3CL1	cg06830319	chr16:57372162	CGI:chr16:57382062-57382426	promoter	0.641018	0.775934	-2.98999	0.00278988	0.0159501	-0.134916	4124.85	-1.50925	0.427317	-3.53193	0.000412541	0.00595247
BRCA	ENSG00000102878	HSF4	cg03887094	chr16:67164923	CGI:chr16:67162889-67166085	gene body,CDS,exon,promoter	0.289467	0.153539	3.44515	0.000570752	0.00662508	0.135927	526.629	1.51937	0.354137	4.29035	1.7839e-05	0.000555309
BRCA	ENSG00000172137	CALB2	cg27207776	chr16:71359898	CGI:chr16:71358631-71358846	gene body,promoter	0.364508	0.155694	4.0086	6.10788e-05	0.00112602	0.208815	807.779	-2.36035	0.593331	-3.97813	6.94598e-05	0.00155592
BRCA	ENSG00000198650	TAT	cg22136365	chr16:71577140	CGI:chr16:71625926-71626844	promoter	0.484739	0.591983	-1.97284	0.0485143	0.0493708	-0.107243	2644.29	-6.07025	0.897985	-6.75985	1.38131e-11	8.81471e-09
BRCA	ENSG00000131153	GINS2	cg26571870	chr16:85689544	CGI:chr16:85688603-85689335	gene body,promoter	0.442094	0.341276	2.08992	0.0366251	0.044371	0.100818	1295.09	1.42862	0.310315	4.60378	4.14896e-06	0.000186265
BRCA	ENSG00000131153	GINS2	cg08871354	chr16:85689883	CGI:chr16:85688603-85689335	gene body,UTR,exon,promoter	0.574025	0.406565	2.66069	0.00779797	0.0242965	0.16746	1295.09	1.42862	0.310315	4.60378	4.14896e-06	0.000186265
BRCA	ENSG00000131153	GINS2	cg19890739	chr16:85689933	CGI:chr16:85688603-85689335	gene body,UTR,exon,promoter	0.439172	0.304391	2.61679	0.00887614	0.0255309	0.134782	1295.09	1.42862	0.310315	4.60378	4.14896e-06	0.000186265
BRCA	ENSG00000140968	IRF8	cg06672120	chr16:85898777	CGI:chr16:85898515-85899336	promoter	0.25273	0.43907	-2.44263	0.0145807	0.0309106	-0.18634	1175.3	-1.28613	0.342877	-3.75099	0.000176137	0.0031758
BRCA	ENSG00000176692	FOXC2	cg04081201	chr16:86567418	CGI:chr16:86565749-86569043	gene body,CDS,exon,promoter	0.359167	0.499981	-2.16749	0.0301979	0.0410858	-0.140814	174.257	-2.06217	0.512168	-4.02635	5.66482e-05	0.00133008
BRCA	ENSG00000168329	CX3CR1	cg04569233	chr3:39279958	CGI:chr3:39180789-39181179	gene body,UTR,exon,promoter	0.626379	0.729472	-2.17041	0.0299756	0.0409699	-0.103094	679.074	-1.27135	0.44408	-2.86289	0.00419799	0.0314506
BRCA	ENSG00000144648	ACKR2	cg02718966	chr3:42805478	CGI:chr3:42803944-42804863	gene body,exon,promoter	0.225733	0.117401	2.68411	0.0072723	0.023643	0.108332	318.829	-2.15613	0.54236	-3.97546	7.02436e-05	0.00156481
BRCA	ENSG00000144648	ACKR2	cg01293485	chr3:42805552	CGI:chr3:42803944-42804863	gene body,exon,promoter	0.502888	0.345185	2.52898	0.0114396	0.0280928	0.157702	318.829	-2.15613	0.54236	-3.97546	7.02436e-05	0.00156481
BRCA	ENSG00000144648	ACKR2	cg14508777	chr3:42805624	CGI:chr3:42803944-42804863	gene body,exon,promoter	0.420203	0.224476	3.56223	0.000367721	0.00483956	0.195727	318.829	-2.15613	0.54236	-3.97546	7.02436e-05	0.00156481
BRCA	ENSG00000172215	CXCR6	cg19145607	chr3:45942300	CGI:chr3:45995521-45995981	gene body,promoter	0.454572	0.295525	2.46019	0.0138863	0.0302928	0.159048	272.336	-1.71303	0.410804	-4.16996	3.04657e-05	0.000828557
BRCA	ENSG00000188338	SLC38A3	cg13907146	chr3:50206132	CGI:chr3:50205117-50206156	gene body,promoter	0.462439	0.605196	-2.05333	0.0400406	0.0460048	-0.142758	337.044	-2.18669	0.578953	-3.77697	0.000158745	0.00293629
BRCA	ENSG00000121440	PDZRN3	cg05277096	chr3:73623847	CGI:chr3:73624079-73625224	gene body,promoter	0.339399	0.51429	-2.32701	0.0199647	0.0349155	-0.174891	1827.69	-1.18589	0.314953	-3.76529	0.000166355	0.00305177
BRCA	ENSG00000144824	PHLDB2	cg01303385	chr3:111732623	CGI:chr3:111674480-111674697	gene body,UTR,exon,promoter	0.602677	0.422796	2.61825	0.00883815	0.0254753	0.179881	2029.96	-1.13307	0.312308	-3.62805	0.000285565	0.00463019
BRCA	ENSG00000144857	BOC	cg18742893	chr3:113212355	CGI:chr3:113211590-113212659	gene body,UTR,exon,promoter	0.0951156	0.215498	-2.67972	0.00736837	0.023781	-0.120382	1502.98	-1.61256	0.386224	-4.17519	2.97743e-05	0.000814713
BRCA	ENSG00000163406	SLC15A2	cg10523671	chr3:121894109	CGI:chr3:121834973-121835389	gene body,UTR,exon,promoter	0.608387	0.82316	-3.26513	0.00109413	0.00993098	-0.214772	478.494	-2.52957	0.455184	-5.55725	2.74064e-08	3.82577e-06
BRCA	ENSG00000163406	SLC15A2	cg02034887	chr3:121894144	CGI:chr3:121834973-121835389	gene body,UTR,exon,promoter	0.369896	0.561054	-2.73241	0.00628734	0.022297	-0.191158	478.494	-2.52957	0.455184	-5.55725	2.74064e-08	3.82577e-06
BRCA	ENSG00000173175	ADCY5	cg19013391	chr3:123447927	CGI:chr3:123447371-123450281	gene body,CDS,exon,promoter	0.644613	0.76504	-2.61679	0.00887614	0.0255309	-0.120427	1150.17	-1.58554	0.534424	-2.96682	0.00300893	0.0249129
BRCA	ENSG00000173175	ADCY5	cg13878010	chr3:123448429	CGI:chr3:123447371-123450281	gene body,CDS,exon,promoter	0.180348	0.349944	-2.03723	0.0416269	0.0466533	-0.169595	1150.17	-1.58554	0.534424	-2.96682	0.00300893	0.0249129
BRCA	ENSG00000091513	TF	cg18286850	chr3:133745869	CGI:chr3:133746105-133746576	promoter	0.535488	0.706965	-2.39433	0.0166507	0.0325766	-0.171476	954.634	-3.01461	0.648069	-4.65169	3.29226e-06	0.000157289
BRCA	ENSG00000091513	TF	cg08234618	chr3:133745998	CGI:chr3:133746105-133746576	gene body,UTR,exon,promoter	0.717486	0.853969	-2.64313	0.0082143	0.024772	-0.136484	954.634	-3.01461	0.648069	-4.65169	3.29226e-06	0.000157289
BRCA	ENSG00000158258	CLSTN2	cg14498423	chr3:139934486	CGI:chr3:139934588-139936273	promoter	0.45327	0.230493	3.32221	0.000893078	0.00880276	0.222776	12383.6	2.18353	0.570002	3.83075	0.000127755	0.00249206
BRCA	ENSG00000158258	CLSTN2	cg00355389	chr3:139934589	CGI:chr3:139934588-139936273	promoter	0.340263	0.201551	2.53337	0.0112973	0.0279524	0.138712	12383.6	2.18353	0.570002	3.83075	0.000127755	0.00249206
BRCA	ENSG00000163710	PCOLCE2	cg04302290	chr3:142888515	CGI:chr3:142888353-142889387	gene body,promoter	0.0932163	0.22068	-2.2992	0.0214934	0.0359562	-0.127464	327.178	-2.44902	0.598951	-4.08886	4.33506e-05	0.00107284
BRCA	ENSG00000163710	PCOLCE2	cg22826874	chr3:142889376	CGI:chr3:142888353-142889387	promoter	0.306315	0.464996	-1.9743	0.0483477	0.0493077	-0.15868	327.178	-2.44902	0.598951	-4.08886	4.33506e-05	0.00107284
BRCA	ENSG00000175040	CHST2	cg07399369	chr3:143119240	CGI:chr3:143119043-143121996	promoter	0.292995	0.491839	-2.56264	0.010388	0.0270593	-0.198844	590.8	-1.29295	0.383403	-3.37231	0.000745403	0.00909137
BRCA	ENSG00000175040	CHST2	cg10886442	chr3:143119478	CGI:chr3:143119043-143121996	gene body,UTR,exon,promoter	0.291403	0.525203	-2.77192	0.00557263	0.0212862	-0.2338	590.8	-1.29295	0.383403	-3.37231	0.000745403	0.00909137
BRCA	ENSG00000175040	CHST2	cg00995327	chr3:143120005	CGI:chr3:143119043-143121996	gene body,UTR,exon,promoter	0.301748	0.501302	-2.24798	0.0245775	0.0378249	-0.199553	590.8	-1.29295	0.383403	-3.37231	0.000745403	0.00909137
BRCA	ENSG00000175040	CHST2	cg09638407	chr3:143120180	CGI:chr3:143119043-143121996	gene body,UTR,exon,promoter	0.290835	0.494181	-2.4558	0.0140571	0.0304551	-0.203346	590.8	-1.29295	0.383403	-3.37231	0.000745403	0.00909137
BRCA	ENSG00000175040	CHST2	cg23749856	chr3:143120995	CGI:chr3:143119043-143121996	gene body,CDS,exon,promoter	0.36409	0.530327	-2.10894	0.0349494	0.04358	-0.166237	590.8	-1.29295	0.383403	-3.37231	0.000745403	0.00909137
BRCA	ENSG00000175040	CHST2	cg18507129	chr3:143121061	CGI:chr3:143119043-143121996	gene body,CDS,exon,promoter	0.250352	0.427453	-2.6885	0.00717736	0.0234986	-0.177101	590.8	-1.29295	0.383403	-3.37231	0.000745403	0.00909137
BRCA	ENSG00000118849	RARRES1	cg08697665	chr3:158732801	CGI:chr3:158732006-158732808	promoter	0.462186	0.608866	-2.34896	0.0188258	0.0341719	-0.146681	3497.91	-3.05475	0.603063	-5.06539	4.07569e-07	3.09891e-05
BRCA	ENSG00000013297	CLDN11	cg17078427	chr3:170419764	CGI:chr3:170418454-170420098	gene body,promoter	0.387216	0.538084	-2.35482	0.0185318	0.0339772	-0.150868	492.067	-1.51099	0.4294	-3.51884	0.000433441	0.00616128
BRCA	ENSG00000078081	LAMP3	cg00119079	chr3:183162490	CGI:chr3:183162489-183162934	gene body,promoter	0.15464	0.264922	-2.51873	0.0117778	0.0283834	-0.110282	887.954	-2.75296	0.515943	-5.33578	9.51333e-08	9.8828e-06
BRCA	ENSG00000078081	LAMP3	cg07334977	chr3:183162980	CGI:chr3:183162489-183162934	gene body,promoter	0.310017	0.473508	-2.33872	0.01935	0.0345017	-0.163491	887.954	-2.75296	0.515943	-5.33578	9.51333e-08	9.8828e-06
BRCA	ENSG00000176597	B3GNT5	cg27324128	chr3:183252940	CGI:chr3:183253185-183254847	promoter	0.421403	0.596925	-2.44702	0.0144043	0.0307459	-0.175522	631.105	-2.37737	0.452656	-5.25205	1.50415e-07	1.38537e-05
BRCA	ENSG00000176597	B3GNT5	cg17701886	chr3:183253045	CGI:chr3:183253185-183254847	promoter	0.233412	0.41915	-2.73533	0.0062317	0.0222351	-0.185737	631.105	-2.37737	0.452656	-5.25205	1.50415e-07	1.38537e-05
BRCA	ENSG00000176597	B3GNT5	cg01720186	chr3:183253058	CGI:chr3:183253185-183254847	promoter	0.213987	0.465137	-3.18317	0.0014567	0.0115858	-0.25115	631.105	-2.37737	0.452656	-5.25205	1.50415e-07	1.38537e-05
BRCA	ENSG00000176597	B3GNT5	cg15510249	chr3:183253062	CGI:chr3:183253185-183254847	promoter	0.229161	0.455166	-2.85827	0.00425957	0.019037	-0.226005	631.105	-2.37737	0.452656	-5.25205	1.50415e-07	1.38537e-05
BRCA	ENSG00000176597	B3GNT5	cg19998675	chr3:183253115	CGI:chr3:183253185-183254847	promoter	0.192783	0.417813	-2.78656	0.00532711	0.0209052	-0.22503	631.105	-2.37737	0.452656	-5.25205	1.50415e-07	1.38537e-05
BRCA	ENSG00000176597	B3GNT5	cg02238826	chr3:183253281	CGI:chr3:183253185-183254847	gene body,UTR,exon,promoter	0.174353	0.354699	-2.8451	0.00443977	0.0193921	-0.180346	631.105	-2.37737	0.452656	-5.25205	1.50415e-07	1.38537e-05
BRCA	ENSG00000176597	B3GNT5	cg27034902	chr3:183253642	CGI:chr3:183253185-183254847	gene body,UTR,exon,promoter	0.202071	0.446915	-3.14073	0.00168526	0.0124817	-0.244844	631.105	-2.37737	0.452656	-5.25205	1.50415e-07	1.38537e-05
BRCA	ENSG00000176597	B3GNT5	cg05658593	chr3:183253654	CGI:chr3:183253185-183254847	gene body,UTR,exon,promoter	0.199049	0.443113	-3.34563	0.000820972	0.00838065	-0.244064	631.105	-2.37737	0.452656	-5.25205	1.50415e-07	1.38537e-05
BRCA	ENSG00000176597	B3GNT5	cg26215406	chr3:183254837	CGI:chr3:183253185-183254847	gene body,promoter	0.527135	0.687845	-2.19822	0.0279335	0.039777	-0.160709	631.105	-2.37737	0.452656	-5.25205	1.50415e-07	1.38537e-05
BRCA	ENSG00000073849	ST6GAL1	cg11439186	chr3:186931068	CGI:chr3:186930385-186931314	gene body,promoter	0.094218	0.22417	-2.7529	0.00590706	0.0217895	-0.129952	5608.34	-2.06679	0.351227	-5.88449	3.99293e-09	7.92729e-07
BRCA	ENSG00000073849	ST6GAL1	cg01960456	chr3:186931639	CGI:chr3:186930385-186931314	gene body,promoter	0.0625339	0.162758	-2.04309	0.041044	0.0464211	-0.100224	5608.34	-2.06679	0.351227	-5.88449	3.99293e-09	7.92729e-07
BRCA	ENSG00000090530	P3H2	cg10244461	chr3:190121568	CGI:chr3:190120291-190121090	gene body,UTR,exon,promoter	0.707264	0.813784	-2.17188	0.029865	0.0409047	-0.10652	522.224	-1.17957	0.3713	-3.17687	0.00148872	0.0151053
BRCA	ENSG00000171608	PIK3CD	cg22045271	chr1:9651592	CGI:chr1:9651674-9652943	promoter	0.192445	0.413257	-3.4349	0.000592771	0.00678657	-0.220813	1133.08	-1.12247	0.297562	-3.77222	0.000161798	0.00298043
BRCA	ENSG00000162551	ALPL	cg17015803	chr1:21509127	CGI:chr1:21509055-21509851	promoter	0.0947998	0.210444	-2.39872	0.0164524	0.032415	-0.115644	1310.19	-1.58334	0.435036	-3.63955	0.000273115	0.00447298
BRCA	ENSG00000084628	NKAIN1	cg00832476	chr1:31238241	CGI:chr1:31239231-31239965	gene body,promoter	0.735345	0.605964	3.06463	0.00217941	0.0142172	0.129381	2908.96	1.91691	0.604819	3.1694	0.00152755	0.0153771
BRCA	ENSG00000142910	TINAGL1	cg09070415	chr1:31575451	CGI:chr1:31586870-31587170	promoter	0.675394	0.854184	-3.56223	0.000367721	0.00483956	-0.17879	2344.02	-1.22483	0.366274	-3.34402	0.000825732	0.00981649
BRCA	ENSG00000142910	TINAGL1	cg16103203	chr1:31575906	CGI:chr1:31586870-31587170	promoter	0.473066	0.647647	-2.70899	0.00674882	0.0229318	-0.174581	2344.02	-1.22483	0.366274	-3.34402	0.000825732	0.00981649
BRCA	ENSG00000142910	TINAGL1	cg10530055	chr1:31576004	CGI:chr1:31586870-31587170	promoter	0.561358	0.706153	-2.30359	0.0212455	0.0358062	-0.144795	2344.02	-1.22483	0.366274	-3.34402	0.000825732	0.00981649
BRCA	ENSG00000142910	TINAGL1	cg03314569	chr1:31576131	CGI:chr1:31586870-31587170	promoter	0.591846	0.795327	-3.31196	0.000926434	0.00900825	-0.203481	2344.02	-1.22483	0.366274	-3.34402	0.000825732	0.00981649
BRCA	ENSG00000142910	TINAGL1	cg15120085	chr1:31576297	CGI:chr1:31586870-31587170	promoter	0.477271	0.629578	-2.0343	0.0419209	0.0467513	-0.152307	2344.02	-1.22483	0.366274	-3.34402	0.000825732	0.00981649
BRCA	ENSG00000142910	TINAGL1	cg15079885	chr1:31576339	CGI:chr1:31586870-31587170	promoter	0.43621	0.595377	-2.06065	0.0393367	0.0456732	-0.159166	2344.02	-1.22483	0.366274	-3.34402	0.000825732	0.00981649
BRCA	ENSG00000142910	TINAGL1	cg22855405	chr1:31576436	CGI:chr1:31586870-31587170	promoter	0.350624	0.544749	-2.27286	0.0230347	0.036911	-0.194125	2344.02	-1.22483	0.366274	-3.34402	0.000825732	0.00981649
BRCA	ENSG00000142910	TINAGL1	cg14869028	chr1:31576560	CGI:chr1:31586870-31587170	gene body,UTR,exon,promoter	0.33351	0.478053	-2.11626	0.0343226	0.0432843	-0.144542	2344.02	-1.22483	0.366274	-3.34402	0.000825732	0.00981649
BRCA	ENSG00000182866	LCK	cg04249754	chr1:32249882	CGI:chr1:32239923-32241540	promoter	0.663993	0.765816	-2.57874	0.00991624	0.0265873	-0.101823	618.255	-1.51615	0.435879	-3.47837	0.00050447	0.00682352
BRCA	ENSG00000182866	LCK	cg01525376	chr1:32250611	CGI:chr1:32239923-32241540	promoter	0.664412	0.794159	-3.47149	0.000517581	0.00619912	-0.129746	618.255	-1.51615	0.435879	-3.47837	0.00050447	0.00682352
BRCA	ENSG00000182866	LCK	cg12710152	chr1:32251172	CGI:chr1:32239923-32241540	promoter	0.69883	0.821579	-2.77046	0.00559774	0.0213322	-0.122748	618.255	-1.51615	0.435879	-3.47837	0.00050447	0.00682352
BRCA	ENSG00000189280	GJB5	cg25732104	chr1:34755109	CGI:chr1:34761427-34761675	gene body,UTR,exon,promoter	0.64798	0.777951	-2.31237	0.0207571	0.0354866	-0.129971	143.653	-2.28456	0.657054	-3.47698	0.000507091	0.00685378
BRCA	ENSG00000119535	CSF3R	cg16122427	chr1:36482388	CGI:chr1:36463813-36464530	gene body,promoter	0.284224	0.164761	3.20659	0.00134318	0.0111118	0.119463	1782.68	-1.04874	0.395004	-2.65501	0.0079306	0.0491686
BRCA	ENSG00000119535	CSF3R	cg14523574	chr1:36482969	CGI:chr1:36463813-36464530	gene body,UTR,exon,promoter	0.461793	0.574771	-2.12065	0.0339511	0.043077	-0.112978	1782.68	-1.04874	0.395004	-2.65501	0.0079306	0.0491686
BRCA	ENSG00000119535	CSF3R	cg13084345	chr1:36483132	CGI:chr1:36463813-36464530	gene body,UTR,exon,promoter	0.527892	0.684373	-2.83339	0.00460571	0.0196981	-0.156481	1782.68	-1.04874	0.395004	-2.65501	0.0079306	0.0491686
BRCA	ENSG00000119535	CSF3R	cg07285167	chr1:36483380	CGI:chr1:36463813-36464530	promoter	0.717788	0.869921	-3.06463	0.00217941	0.0142172	-0.152133	1782.68	-1.04874	0.395004	-2.65501	0.0079306	0.0491686
BRCA	ENSG00000162366	PDZK1IP1	cg07150145	chr1:47190465	CGI:chr1:47225308-47226055	gene body,promoter	0.332788	0.478488	-2.11041	0.0348233	0.0435216	-0.1457	2077.09	-2.46421	0.542393	-4.54323	5.53998e-06	0.000230206
BRCA	ENSG00000162366	PDZK1IP1	cg26523175	chr1:47190751	CGI:chr1:47225308-47226055	gene body,UTR,exon,promoter	0.670293	0.794476	-2.25383	0.0242067	0.0376085	-0.124183	2077.09	-2.46421	0.542393	-4.54323	5.53998e-06	0.000230206
BRCA	ENSG00000137975	CLCA2	cg01769468	chr1:86422902	CGI:chr1:86395883-86396400	promoter	0.834135	0.71248	2.39433	0.0166507	0.0325766	0.121655	1722.34	-6.05176	0.864628	-6.99926	2.5732e-12	2.70459e-09
BRCA	ENSG00000171488	LRRC8C	cg14254720	chr1:89632422	CGI:chr1:89632671-89633733	promoter	0.573529	0.765934	-3.14659	0.00165189	0.0123548	-0.192406	1343.38	-1.0565	0.265811	-3.97463	7.04888e-05	0.00156481
BRCA	ENSG00000064886	CHI3L2	cg20317872	chr1:111200580	CGI:chr1:111203691-111204681	promoter	0.560193	0.708339	-2.26847	0.0233007	0.037065	-0.148146	2298.23	-2.67629	0.60241	-4.44264	8.88609e-06	0.000333564
BRCA	ENSG00000064886	CHI3L2	cg00619207	chr1:111200746	CGI:chr1:111203691-111204681	promoter	0.346004	0.232176	2.86559	0.00416235	0.0188529	0.113828	2298.23	-2.67629	0.60241	-4.44264	8.88609e-06	0.000333564
BRCA	ENSG00000064886	CHI3L2	cg19268695	chr1:111200789	CGI:chr1:111203691-111204681	gene body,UTR,exon,promoter	0.34102	0.234173	2.77485	0.00552273	0.0212166	0.106847	2298.23	-2.67629	0.60241	-4.44264	8.88609e-06	0.000333564
BRCA	ENSG00000134242	PTPN22	cg14385738	chr1:113871718	CGI:chr1:113904832-113905402	gene body,UTR,exon,promoter	0.512985	0.651983	-2.04894	0.040468	0.0461814	-0.138999	322.801	-1.33307	0.345389	-3.85963	0.000113558	0.00227029
BRCA	ENSG00000134240	HMGCS2	cg13976683	chr1:119768919	CGI:chr1:119712221-119712649	promoter	0.602832	0.461861	2.36067	0.0182419	0.0337655	0.140971	3414.45	-4.57879	0.898774	-5.09448	3.49696e-07	2.74051e-05
BRCA	ENSG00000134240	HMGCS2	cg10212621	chr1:119769026	CGI:chr1:119712221-119712649	promoter	0.345081	0.197428	3.40709	0.000656586	0.00724473	0.147653	3414.45	-4.57879	0.898774	-5.09448	3.49696e-07	2.74051e-05
BRCA	ENSG00000134240	HMGCS2	cg18199617	chr1:119769030	CGI:chr1:119712221-119712649	promoter	0.457723	0.279915	3.55637	0.000376009	0.00491579	0.177808	3414.45	-4.57879	0.898774	-5.09448	3.49696e-07	2.74051e-05
BRCA	ENSG00000169474	SPRR1A	cg07909128	chr1:152984903	CGI:chr1:153260996-153261837	promoter	0.617317	0.396766	2.57581	0.0100006	0.0266618	0.220551	15.6883	-3.78454	1.27234	-2.97447	0.00293496	0.0244941
BRCA	ENSG00000163209	SPRR3	cg24667326	chr1:153001244	CGI:chr1:153260996-153261837	promoter	0.664896	0.478977	2.88608	0.00390076	0.0184452	0.185919	42.963	-6.01428	1.43648	-4.18682	2.82888e-05	0.000786104
BRCA	ENSG00000163209	SPRR3	cg04138756	chr1:153001373	CGI:chr1:153260996-153261837	promoter	0.597177	0.453979	2.24798	0.0245775	0.0378249	0.143199	42.963	-6.01428	1.43648	-4.18682	2.82888e-05	0.000786104
BRCA	ENSG00000163209	SPRR3	cg25856811	chr1:153001481	CGI:chr1:153260996-153261837	promoter	0.393523	0.224564	3.05146	0.00227734	0.0144809	0.168959	42.963	-6.01428	1.43648	-4.18682	2.82888e-05	0.000786104
BRCA	ENSG00000163209	SPRR3	cg21543102	chr1:153002295	CGI:chr1:153260996-153261837	gene body,exon,promoter	0.620403	0.452914	2.59923	0.00934342	0.0259985	0.167489	42.963	-6.01428	1.43648	-4.18682	2.82888e-05	0.000786104
BRCA	ENSG00000169469	SPRR1B	cg18771659	chr1:153030286	CGI:chr1:153260996-153261837	promoter	0.697267	0.518854	2.61093	0.00902953	0.0256832	0.178413	26.3488	-8.40353	1.51538	-5.5455	2.9311e-08	4.02868e-06
BRCA	ENSG00000241794	SPRR2A	cg04993112	chr1:153058038	CGI:chr1:153260996-153261837	promoter	0.435508	0.331056	1.96552	0.0493543	0.0496717	0.104452	14.4798	-6.27601	2.19024	-2.86544	0.00416425	0.0312634
BRCA	ENSG00000241794	SPRR2A	cg22014834	chr1:153058091	CGI:chr1:153260996-153261837	promoter	0.827034	0.6114	3.63394	0.000279125	0.00393655	0.215634	14.4798	-6.27601	2.19024	-2.86544	0.00416425	0.0312634
BRCA	ENSG00000241794	SPRR2A	cg09169531	chr1:153058118	CGI:chr1:153260996-153261837	promoter	0.593826	0.400765	2.71631	0.00660144	0.0227204	0.193061	14.4798	-6.27601	2.19024	-2.86544	0.00416425	0.0312634
BRCA	ENSG00000203782	LOR	cg06970571	chr1:153259584	CGI:chr1:153260996-153261837	promoter	0.716257	0.438205	3.45393	0.000552488	0.00649183	0.278051	4.05981	-3.44384	1.08605	-3.17099	0.00151923	0.0153278
BRCA	ENSG00000203782	LOR	cg13769805	chr1:153259600	CGI:chr1:153260996-153261837	promoter	0.752172	0.548528	3.14073	0.00168526	0.0124817	0.203645	4.05981	-3.44384	1.08605	-3.17099	0.00151923	0.0153278
BRCA	ENSG00000203782	LOR	cg27626424	chr1:153259872	CGI:chr1:153260996-153261837	gene body,promoter	0.732048	0.477226	3.24903	0.00115798	0.0102657	0.254822	4.05981	-3.44384	1.08605	-3.17099	0.00151923	0.0153278
BRCA	ENSG00000203782	LOR	cg14563787	chr1:153259984	CGI:chr1:153260996-153261837	gene body,promoter	0.732964	0.504822	3.36904	0.0007543	0.00794214	0.228141	4.05981	-3.44384	1.08605	-3.17099	0.00151923	0.0153278
BRCA	ENSG00000163220	S100A9	cg07039113	chr1:153356537	CGI:chr1:153260996-153261837	promoter	0.572164	0.439335	2.27871	0.0226841	0.0366996	0.132829	8489.78	-4.49672	0.748535	-6.00737	1.88563e-09	4.55302e-07
BRCA	ENSG00000163220	S100A9	cg25286012	chr1:153356585	CGI:chr1:153260996-153261837	promoter	0.373591	0.264478	2.45434	0.0141145	0.0304808	0.109113	8489.78	-4.49672	0.748535	-6.00737	1.88563e-09	4.55302e-07
BRCA	ENSG00000163220	S100A9	cg23092820	chr1:153357036	CGI:chr1:153260996-153261837	promoter	0.715726	0.61301	2.33286	0.0196553	0.0347032	0.102716	8489.78	-4.49672	0.748535	-6.00737	1.88563e-09	4.55302e-07
BRCA	ENSG00000163220	S100A9	cg05848175	chr1:153357781	CGI:chr1:153260996-153261837	promoter	0.409809	0.522063	-1.98015	0.0476863	0.0490657	-0.112255	8489.78	-4.49672	0.748535	-6.00737	1.88563e-09	4.55302e-07
BRCA	ENSG00000143546	S100A8	cg09174555	chr1:153391544	CGI:chr1:153260996-153261837	promoter	0.331598	0.198496	2.32701	0.0199647	0.0349155	0.133102	2466.71	-4.60523	0.77508	-5.94163	2.82207e-09	6.30309e-07
BRCA	ENSG00000160712	IL6R	cg24346686	chr1:154404888	CGI:chr1:154405194-154405969	promoter	0.541123	0.653245	-1.96698	0.0491853	0.049612	-0.112122	1017.38	-1.02519	0.296665	-3.45572	0.000548831	0.00723728
BRCA	ENSG00000160712	IL6R	cg23609982	chr1:154404927	CGI:chr1:154405194-154405969	promoter	0.601529	0.757649	-2.87583	0.00402963	0.0186684	-0.15612	1017.38	-1.02519	0.296665	-3.45572	0.000548831	0.00723728
BRCA	ENSG00000213088	ACKR1	cg20944283	chr1:159202830	CGI:chr1:159188438-159188708	promoter	0.348071	0.232371	2.99731	0.00272377	0.0157741	0.1157	1406.94	-1.66191	0.587242	-2.83002	0.00465446	0.0340844
BRCA	ENSG00000213088	ACKR1	cg10808936	chr1:159203426	CGI:chr1:159188438-159188708	gene body,UTR,exon,promoter	0.504933	0.351132	2.32555	0.0200428	0.0349771	0.153801	1406.94	-1.66191	0.587242	-2.83002	0.00465446	0.0340844
BRCA	ENSG00000213088	ACKR1	cg23507131	chr1:159204366	CGI:chr1:159188438-159188708	gene body,UTR,exon,promoter	0.357241	0.226959	3.21098	0.00132283	0.0110278	0.130281	1406.94	-1.66191	0.587242	-2.83002	0.00465446	0.0340844
BRCA	ENSG00000213088	ACKR1	cg18552413	chr1:159204820	CGI:chr1:159188438-159188708	gene body,UTR,exon,promoter	0.311445	0.192834	3.0017	0.0026848	0.0156635	0.118611	1406.94	-1.66191	0.587242	-2.83002	0.00465446	0.0340844
BRCA	ENSG00000198771	RCSD1	cg25765104	chr1:167632038	CGI:chr1:167630235-167630602	gene body,promoter	0.759114	0.867836	-2.43531	0.014879	0.03117	-0.108722	1097.48	-1.12804	0.319128	-3.53476	0.000408142	0.0059098
BRCA	ENSG00000007933	FMO3	cg16599143	chr1:171089531	CGI:chr1:171485378-171486100	promoter	0.503794	0.342244	2.2714	0.023123	0.0369615	0.161549	223.279	-1.67072	0.452311	-3.69374	0.000220982	0.00380029
BRCA	ENSG00000081277	PKP1	cg05184311	chr1:201284409	CGI:chr1:201283324-201284520	gene body,promoter	0.679189	0.782769	-2.26847	0.0233007	0.037065	-0.10358	2746.23	-1.88062	0.65776	-2.85913	0.00424805	0.0317192
BRCA	ENSG00000133048	CHI3L1	cg03625911	chr1:203186609	CGI:chr1:203128105-203128368	gene body,CDS,exon,promoter	0.517396	0.665053	-2.93584	0.00332649	0.0172776	-0.147657	6904.49	-3.03585	0.617599	-4.91556	8.8527e-07	5.5894e-05
BRCA	ENSG00000133048	CHI3L1	cg14085262	chr1:203186810	CGI:chr1:203128105-203128368	promoter	0.381455	0.540842	-2.42946	0.0151215	0.0313679	-0.159386	6904.49	-3.03585	0.617599	-4.91556	8.8527e-07	5.5894e-05
BRCA	ENSG00000133048	CHI3L1	cg07423149	chr1:203187118	CGI:chr1:203128105-203128368	promoter	0.536217	0.676139	-2.38116	0.0172582	0.0330253	-0.139922	6904.49	-3.03585	0.617599	-4.91556	8.8527e-07	5.5894e-05
BRCA	ENSG00000188783	PRELP	cg07947930	chr1:203475817	CGI:chr1:203486687-203486913	promoter	0.266344	0.135062	2.99145	0.00277655	0.0159064	0.131282	3609.31	-1.71267	0.438162	-3.90877	9.27673e-05	0.00194719
BRCA	ENSG00000122188	LAX1	cg23893629	chr1:203764843	CGI:chr1:203795440-203796165	promoter	0.692528	0.563547	2.07675	0.037825	0.0449218	0.128981	189.513	-2.26611	0.493889	-4.58829	4.46883e-06	0.000197888
BRCA	ENSG00000162896	PIGR	cg02105856	chr1:206946439	CGI:chr1:206909348-206909857	gene body,UTR,exon,promoter	0.507782	0.381182	1.96552	0.0493543	0.0496717	0.1266	2849.71	-3.93341	0.757314	-5.1939	2.05929e-07	1.80926e-05
BRCA	ENSG00000182795	C1orf116	cg01119135	chr1:207032180	CGI:chr1:207050744-207051105	gene body,promoter	0.347163	0.23995	2.61532	0.00891426	0.0255714	0.107213	2565.28	1.40753	0.510153	2.75904	0.0057972	0.0397637
BRCA	ENSG00000123836	PFKFB2	cg15485859	chr1:207033102	CGI:chr1:207050744-207051105	promoter	0.445926	0.296026	2.74704	0.00601354	0.0219334	0.1499	1911.76	1.30511	0.291145	4.48268	7.37108e-06	0.00028883
BRCA	ENSG00000182795	C1orf116	cg15485859	chr1:207033102	CGI:chr1:207050744-207051105	promoter	0.445926	0.296026	2.74704	0.00601354	0.0219334	0.1499	2565.28	1.40753	0.510153	2.75904	0.0057972	0.0397637
BRCA	ENSG00000123838	C4BPA	cg22491058	chr1:207104121	CGI:chr1:207052936-207053497	promoter	0.480369	0.594412	-1.99186	0.0463862	0.0485895	-0.114043	55.1339	-3.90638	0.784814	-4.97746	6.44233e-07	4.34383e-05
BRCA	ENSG00000123838	C4BPA	cg17803430	chr1:207104979	CGI:chr1:207052936-207053497	gene body,promoter	0.656855	0.545745	2.06357	0.0390581	0.0455241	0.111111	55.1339	-3.90638	0.784814	-4.97746	6.44233e-07	4.34383e-05
BRCA	ENSG00000117322	CR2	cg14848620	chr1:207453190	CGI:chr1:207454186-207454935	promoter	0.734165	0.585351	2.1148	0.0344472	0.0433346	0.148814	217.335	-4.30801	0.814357	-5.29007	1.22267e-07	1.19381e-05
BRCA	ENSG00000092969	TGFB2	cg06899755	chr1:218346983	CGI:chr1:218346945-218347164	gene body,CDS,exon,promoter	0.258067	0.481221	-2.18358	0.0289928	0.0404185	-0.223154	1265.24	-1.26329	0.460187	-2.74516	0.00604807	0.0408346
BRCA	ENSG00000092969	TGFB2	cg13285637	chr1:218347093	CGI:chr1:218346945-218347164	gene body,promoter	0.165729	0.316116	-2.18651	0.0287782	0.0402794	-0.150387	1265.24	-1.26329	0.460187	-2.74516	0.00604807	0.0408346
BRCA	ENSG00000203685	C1orf95	cg07046852	chr1:226549640	CGI:chr1:226548679-226549711	gene body,promoter	0.128565	0.381722	-3.53149	0.00041322	0.00526156	-0.253158	541.12	-2.65192	0.648252	-4.09088	4.29744e-05	0.00106648
BRCA	ENSG00000203685	C1orf95	cg21339969	chr1:226549692	CGI:chr1:226548679-226549711	gene body,promoter	0.175274	0.294389	-2.44848	0.0143459	0.0306936	-0.119116	541.12	-2.65192	0.648252	-4.09088	4.29744e-05	0.00106648
BRCA	ENSG00000143632	ACTA1	cg13547644	chr1:229433861	CGI:chr1:229431459-229434937	gene body,promoter	0.347562	0.509471	-2.60362	0.00922459	0.0258862	-0.161908	241.774	-2.6985	0.636196	-4.24161	2.21917e-05	0.000661973
BRCA	ENSG00000143632	ACTA1	cg02767613	chr1:229434147	CGI:chr1:229431459-229434937	promoter	0.168891	0.287119	-1.99333	0.0462258	0.0485232	-0.118228	241.774	-2.6985	0.636196	-4.24161	2.21917e-05	0.000661973
BRCA	ENSG00000143632	ACTA1	cg00064261	chr1:229434310	CGI:chr1:229431459-229434937	promoter	0.204303	0.316942	-2.53337	0.0112973	0.0279524	-0.112639	241.774	-2.6985	0.636196	-4.24161	2.21917e-05	0.000661973
BRCA	ENSG00000143632	ACTA1	cg07777790	chr1:229434441	CGI:chr1:229431459-229434937	promoter	0.268832	0.46568	-2.88169	0.00395552	0.0185327	-0.196848	241.774	-2.6985	0.636196	-4.24161	2.21917e-05	0.000661973
BRCA	ENSG00000143632	ACTA1	cg20025656	chr1:229434483	CGI:chr1:229431459-229434937	promoter	0.336323	0.454995	-1.98308	0.0473584	0.0489601	-0.118672	241.774	-2.6985	0.636196	-4.24161	2.21917e-05	0.000661973
BRCA	ENSG00000143632	ACTA1	cg12908399	chr1:229434541	CGI:chr1:229431459-229434937	promoter	0.206442	0.343856	-2.09577	0.0361024	0.0441377	-0.137414	241.774	-2.6985	0.636196	-4.24161	2.21917e-05	0.000661973
BRCA	ENSG00000182118	FAM89A	cg16908552	chr1:231038407	CGI:chr1:231039316-231041263	gene body,promoter	0.743666	0.57086	2.07089	0.0383689	0.0452006	0.172806	355.296	-1.14568	0.357845	-3.2016	0.00136668	0.0141237
BRCA	ENSG00000182118	FAM89A	cg00679738	chr1:231039500	CGI:chr1:231039316-231041263	gene body,promoter	0.264828	0.460133	-2.41482	0.0157429	0.0318617	-0.195305	355.296	-1.14568	0.357845	-3.2016	0.00136668	0.0141237
BRCA	ENSG00000182118	FAM89A	cg16516400	chr1:231041455	CGI:chr1:231039316-231041263	promoter	0.437502	0.291628	2.41189	0.0158699	0.0319669	0.145874	355.296	-1.14568	0.357845	-3.2016	0.00136668	0.0141237
BRCA	ENSG00000168243	GNG4	cg09649610	chr1:235650739	CGI:chr1:235648541-235650766	gene body,UTR,exon,promoter	0.534759	0.693516	-2.07967	0.0375555	0.044798	-0.158758	605.664	-1.80024	0.679849	-2.64799	0.00809707	0.0498033
BRCA	ENSG00000168243	GNG4	cg22941646	chr1:235651039	CGI:chr1:235650980-235651188	promoter	0.714242	0.816716	-2.01967	0.0434177	0.0474063	-0.102474	605.664	-1.80024	0.679849	-2.64799	0.00809707	0.0498033
BRCA	ENSG00000159167	STC1	cg07774884	chr8:23854851	CGI:chr8:23726473-23727248	promoter	0.197677	0.0884503	2.42068	0.0154917	0.0316642	0.109227	5427.02	2.06431	0.493708	4.18125	2.89917e-05	0.000796959
BRCA	ENSG00000240694	PNMA2	cg02154186	chr8:26513837	CGI:chr8:26513656-26515314	gene body,UTR,exon,promoter	0.245467	0.48089	-3.06024	0.00221162	0.0143185	-0.235423	387.009	-1.56015	0.450608	-3.46231	0.000535552	0.00712035
BRCA	ENSG00000240694	PNMA2	cg18235000	chr8:26515313	CGI:chr8:26513656-26515314	promoter	0.571084	0.754211	-2.81583	0.00486517	0.020098	-0.183127	387.009	-1.56015	0.450608	-3.46231	0.000535552	0.00712035
BRCA	ENSG00000240694	PNMA2	cg26268277	chr8:26515363	CGI:chr8:26513656-26515314	promoter	0.628745	0.743941	-2.19529	0.0281426	0.0399035	-0.115196	387.009	-1.56015	0.450608	-3.46231	0.000535552	0.00712035
BRCA	ENSG00000104332	SFRP1	cg02388150	chr8:41308180	CGI:chr8:41308333-41309621	gene body,promoter	0.405313	0.552638	-2.00942	0.0444922	0.0478323	-0.147325	10421.1	-3.77029	0.669212	-5.63393	1.76153e-08	2.71336e-06
BRCA	ENSG00000104332	SFRP1	cg13398291	chr8:41308650	CGI:chr8:41308333-41309621	gene body,CDS,exon,promoter	0.266415	0.388007	-2.09138	0.0364939	0.0443065	-0.121592	10421.1	-3.77029	0.669212	-5.63393	1.76153e-08	2.71336e-06
BRCA	ENSG00000104332	SFRP1	cg22418909	chr8:41309219	CGI:chr8:41308333-41309621	gene body,UTR,exon,promoter	0.350873	0.498419	-2.03723	0.0416269	0.0466533	-0.147546	10421.1	-3.77029	0.669212	-5.63393	1.76153e-08	2.71336e-06
BRCA	ENSG00000104332	SFRP1	cg03133371	chr8:41310154	CGI:chr8:41308333-41309621	promoter	0.23524	0.354435	-2.15578	0.0311011	0.0416081	-0.119195	10421.1	-3.77029	0.669212	-5.63393	1.76153e-08	2.71336e-06
BRCA	ENSG00000254087	LYN	cg08894788	chr8:55879612	CGI:chr8:55879556-55880766	promoter	0.177468	0.393158	-2.62996	0.00853949	0.0251602	-0.21569	2128.91	-1.07835	0.288334	-3.73994	0.000184061	0.00329217
BRCA	ENSG00000254087	LYN	cg23055315	chr8:55879675	CGI:chr8:55879556-55880766	promoter	0.103583	0.253054	-2.93437	0.00334221	0.0173177	-0.149471	2128.91	-1.07835	0.288334	-3.73994	0.000184061	0.00329217
BRCA	ENSG00000254087	LYN	cg12531953	chr8:55880516	CGI:chr8:55879556-55880766	gene body,promoter	0.452025	0.631481	-2.65338	0.00796909	0.0245081	-0.179456	2128.91	-1.07835	0.288334	-3.73994	0.000184061	0.00329217
BRCA	ENSG00000254087	LYN	cg04363768	chr8:55880601	CGI:chr8:55879556-55880766	gene body,promoter	0.197909	0.312885	-2.00211	0.0452733	0.0481527	-0.114976	2128.91	-1.07835	0.288334	-3.73994	0.000184061	0.00329217
BRCA	ENSG00000165078	CPA6	cg09428251	chr8:67746173	CGI:chr8:67952190-67952711	gene body,UTR,exon,promoter	0.426762	0.623181	-3.15098	0.00162726	0.0122471	-0.196419	156.299	-2.82253	0.79078	-3.5693	0.000357938	0.00537449
BRCA	ENSG00000104321	TRPA1	cg01610488	chr8:72075635	CGI:chr8:72075245-72075788	promoter	0.229163	0.440414	-2.74558	0.00604043	0.0219704	-0.211251	328.332	-2.50773	0.747001	-3.35706	0.000787763	0.00945316
BRCA	ENSG00000104321	TRPA1	cg09514401	chr8:72075787	CGI:chr8:72075245-72075788	promoter	0.241331	0.450467	-3.17586	0.00149395	0.0117454	-0.209135	328.332	-2.50773	0.747001	-3.35706	0.000787763	0.00945316
BRCA	ENSG00000137558	PI15	cg10819495	chr8:74823317	CGI:chr8:74984293-74984881	promoter	0.319738	0.468171	-2.19822	0.0279335	0.039777	-0.148433	2494.65	-2.0187	0.69409	-2.90841	0.00363269	0.0283322
BRCA	ENSG00000121005	CRISPLD1	cg21130958	chr8:74986003	CGI:chr8:74984293-74984881	gene body,CDS,exon,promoter	0.619661	0.753063	-2.09577	0.0361024	0.0441377	-0.133402	2141.5	-1.47749	0.552525	-2.67407	0.00749368	0.0473909
BRCA	ENSG00000171033	PKIA	cg04689061	chr8:78515758	CGI:chr8:78516198-78516519	promoter	0.635706	0.787651	-2.07089	0.0383689	0.0452006	-0.151944	472.687	-2.19075	0.528533	-4.14496	3.39875e-05	0.000897029
BRCA	ENSG00000171033	PKIA	cg27140220	chr8:78516199	CGI:chr8:78516198-78516519	gene body,UTR,exon,promoter	0.171514	0.348926	-2.66801	0.00763016	0.0241033	-0.177412	472.687	-2.19075	0.528533	-4.14496	3.39875e-05	0.000897029
BRCA	ENSG00000171033	PKIA	cg09043127	chr8:78516209	CGI:chr8:78516198-78516519	gene body,UTR,exon,promoter	0.233238	0.418407	-2.51727	0.0118269	0.0284188	-0.185169	472.687	-2.19075	0.528533	-4.14496	3.39875e-05	0.000897029
BRCA	ENSG00000104490	NCALD	cg00680551	chr8:102123367	CGI:chr8:102123686-102124547	gene body,promoter	0.591263	0.781116	-2.05479	0.0398989	0.0459374	-0.189853	1974.62	-1.28935	0.406594	-3.17111	0.00151856	0.0153278
BRCA	ENSG00000104490	NCALD	cg15842116	chr8:102124546	CGI:chr8:102123686-102124547	gene body,promoter	0.0531384	0.153872	-2.0504	0.0403251	0.0461189	-0.100734	1974.62	-1.28935	0.406594	-3.17111	0.00151856	0.0153278
BRCA	ENSG00000136960	ENPP2	cg05590053	chr8:119672515	CGI:chr8:119832558-119832875	gene body,promoter	0.902399	0.797793	2.08992	0.0366251	0.044371	0.104606	1881.52	-1.4125	0.377501	-3.74172	0.000182766	0.00327549
BRCA	ENSG00000175946	KLHL38	cg07962311	chr8:123653598	CGI:chr8:123540299-123541777	promoter	0.649168	0.794683	-2.22895	0.025817	0.0385663	-0.145515	126.571	-1.29081	0.447458	-2.88476	0.00391706	0.0298847
BRCA	ENSG00000175946	KLHL38	cg22342100	chr8:123653883	CGI:chr8:123540299-123541777	promoter	0.228501	0.125547	3.19635	0.0013918	0.0112991	0.102954	126.571	-1.29081	0.447458	-2.88476	0.00391706	0.0298847
BRCA	ENSG00000131773	KHDRBS3	cg17894088	chr8:135458574	CGI:chr8:135457520-135458099	gene body,UTR,exon,promoter	0.452949	0.322894	2.2714	0.023123	0.0369615	0.130055	847.846	-1.26453	0.374969	-3.37235	0.000745304	0.00909137
BRCA	ENSG00000160886	LY6K	cg09027685	chr8:142701450	CGI:chr8:142700163-142700806	gene body,promoter	0.762927	0.599759	2.50263	0.0123273	0.0288815	0.163168	347.003	-4.34412	0.672262	-6.46195	1.0336e-10	4.50449e-08
BRCA	ENSG00000167656	LY6D	cg26466375	chr8:142787114	CGI:chr8:142776863-142777995	promoter	0.718992	0.554717	2.48946	0.0127937	0.0292757	0.164275	264.228	-7.22433	1.01091	-7.14639	8.90915e-13	9.9493e-10
BRCA	ENSG00000100453	GZMB	cg03875678	chr14:24634340	CGI:chr14:24429667-24430172	promoter	0.40839	0.561441	-2.81876	0.00482103	0.0200343	-0.153051	253.065	-2.03542	0.563095	-3.6147	0.000300696	0.00479718
BRCA	ENSG00000139970	RTN1	cg25097436	chr14:59870254	CGI:chr14:59870233-59870807	gene body,promoter	0.108582	0.220745	-2.34457	0.0190489	0.0342981	-0.112163	1226.04	-1.6368	0.467299	-3.50268	0.000460605	0.00639743
BRCA	ENSG00000100604	CHGA	cg00813752	chr14:92922801	CGI:chr14:92922900-92923554	promoter	0.46934	0.61124	-2.51873	0.0117778	0.0283834	-0.1419	440.632	-6.97611	1.11865	-6.23618	4.48373e-10	1.45881e-07
BRCA	ENSG00000100604	CHGA	cg15480367	chr14:92923140	CGI:chr14:92922900-92923554	gene body,UTR,exon,promoter	0.572132	0.682174	-2.22017	0.0264071	0.038914	-0.110041	440.632	-6.97611	1.11865	-6.23618	4.48373e-10	1.45881e-07
BRCA	ENSG00000185559	DLK1	cg09212014	chr14:100725556	CGI:chr14:100726036-100727400	promoter	0.53653	0.392946	2.68557	0.00724053	0.0235993	0.143584	202.808	-4.21371	1.25089	-3.36858	0.000755561	0.00918392
BRCA	ENSG00000185559	DLK1	cg21575295	chr14:100727095	CGI:chr14:100726036-100727400	gene body,CDS,exon,promoter	0.341434	0.518516	-3.14073	0.00168526	0.0124817	-0.177082	202.808	-4.21371	1.25089	-3.36858	0.000755561	0.00918392
BRCA	ENSG00000184986	TMEM121	cg26382173	chr14:105527928	CGI:chr14:105526162-105530077	gene body,promoter	0.312016	0.207443	2.49532	0.0125845	0.0290862	0.104573	336.232	1.17527	0.383889	3.06147	0.00220251	0.0199567
BRCA	ENSG00000172575	RASGRP1	cg03603381	chr15:38565273	CGI:chr15:38564061-38565457	gene body,promoter	0.575037	0.43174	2.50117	0.0123784	0.0289192	0.143296	1151.56	1.82383	0.417373	4.36978	1.2437e-05	0.000424902
BRCA	ENSG00000188549	C15orf52	cg12732548	chr15:40339372	CGI:chr15:40322898-40324712	gene body,exon,promoter	0.766113	0.911583	-3.15976	0.00157901	0.0120794	-0.14547	1045.08	-1.85189	0.354178	-5.22871	1.70701e-07	1.5327e-05
BRCA	ENSG00000137857	DUOX1	cg06127885	chr15:45128870	CGI:chr15:45129038-45130196	promoter	0.496005	0.601173	-2.18944	0.028565	0.0401319	-0.105168	605.594	-1.40255	0.414754	-3.38164	0.000720537	0.00885643
BRCA	ENSG00000137872	SEMA6D	cg17875483	chr15:47184239	CGI:chr15:47184172-47185302	gene body,UTR,exon,promoter	0.198534	0.420265	-2.7807	0.00542412	0.0210955	-0.221731	579.069	-1.4276	0.450913	-3.16602	0.00154541	0.0154977
BRCA	ENSG00000137872	SEMA6D	cg01053260	chr15:47184285	CGI:chr15:47184172-47185302	gene body,UTR,exon,promoter	0.227376	0.432	-2.36506	0.0180271	0.0336046	-0.204624	579.069	-1.4276	0.450913	-3.16602	0.00154541	0.0154977
BRCA	ENSG00000205502	C2CD4B	cg24181605	chr15:62166648	CGI:chr15:62163816-62165449	promoter	0.520326	0.29445	3.04853	0.00229965	0.0145523	0.225875	100.85	-2.61446	0.552672	-4.73058	2.23884e-06	0.000116628
BRCA	ENSG00000175318	GRAMD2	cg27032813	chr15:72198176	CGI:chr15:72197137-72197775	promoter	0.675196	0.82361	-2.62996	0.00853949	0.0251602	-0.148413	650.648	-2.21359	0.470534	-4.70441	2.54596e-06	0.000128144
BRCA	ENSG00000166426	CRABP1	cg05478779	chr15:78341095	CGI:chr15:78340229-78341747	gene body,CDS,exon,promoter	0.210332	0.402942	-2.74704	0.00601354	0.0219334	-0.19261	1710.75	-6.02931	0.873289	-6.90414	5.05085e-12	4.29755e-09
BRCA	ENSG00000166426	CRABP1	cg19777470	chr15:78341113	CGI:chr15:78340229-78341747	gene body,CDS,exon,promoter	0.243116	0.452616	-2.77339	0.00554763	0.0212537	-0.2095	1710.75	-6.02931	0.873289	-6.90414	5.05085e-12	4.29755e-09
BRCA	ENSG00000140511	HAPLN3	cg22138529	chr15:88894897	CGI:chr15:88894945-88895619	gene body,promoter	0.168939	0.28647	-2.54068	0.0110636	0.0277245	-0.117531	1702.42	-1.97757	0.459019	-4.30826	1.64547e-05	0.000519456
BRCA	ENSG00000166825	ANPEP	cg23161492	chr15:89813970	CGI:chr15:89814170-89815341	gene body,promoter	0.505455	0.32452	2.45434	0.0141145	0.0304808	0.180935	7128.87	3.67145	0.529254	6.93702	4.0045e-12	3.76591e-09
BRCA	ENSG00000166825	ANPEP	cg26222247	chr15:89814289	CGI:chr15:89814170-89815341	gene body,promoter	0.521714	0.328501	2.61532	0.00891426	0.0255714	0.193213	7128.87	3.67145	0.529254	6.93702	4.0045e-12	3.76591e-09
BRCA	ENSG00000166825	ANPEP	cg06963233	chr15:89814760	CGI:chr15:89814170-89815341	gene body,promoter	0.237432	0.0850684	2.62557	0.00865041	0.0252901	0.152364	7128.87	3.67145	0.529254	6.93702	4.0045e-12	3.76591e-09
BRCA	ENSG00000182175	RGMA	cg08695763	chr15:93088682	CGI:chr15:93088199-93089944	gene body,promoter	0.0795279	0.250777	-3.13341	0.00172786	0.0126503	-0.17125	1080.69	-2.10665	0.478808	-4.39979	1.08357e-05	0.000387226
BRCA	ENSG00000182175	RGMA	cg16218980	chr15:93088762	CGI:chr15:93088199-93089944	gene body,promoter	0.100465	0.305749	-2.7807	0.00542412	0.0210955	-0.205284	1080.69	-2.10665	0.478808	-4.39979	1.08357e-05	0.000387226
BRCA	ENSG00000120162	MOB3B	cg14173147	chr9:27528302	CGI:chr9:27528359-27528727	gene body,promoter	0.227212	0.358751	-1.99918	0.0455889	0.0482906	-0.131538	759.269	-1.49069	0.351484	-4.24113	2.22399e-05	0.000662254
BRCA	ENSG00000165272	AQP3	cg02716826	chr9:33447034	CGI:chr9:33447448-33447826	gene body,promoter	0.493294	0.61051	-2.04309	0.041044	0.0464211	-0.117217	4366.74	-1.86488	0.57691	-3.23253	0.00122698	0.0131595
BRCA	ENSG00000135069	PSAT1	cg12548454	chr9:78296541	CGI:chr9:78296863-78297695	promoter	0.110162	0.303254	-2.69143	0.00711468	0.0234044	-0.193093	1038.65	-2.5763	0.623733	-4.13045	3.62055e-05	0.000938927
BRCA	ENSG00000135069	PSAT1	cg13828183	chr9:78296917	CGI:chr9:78296863-78297695	promoter	0.24638	0.436123	-2.12943	0.0332184	0.0427139	-0.189743	1038.65	-2.5763	0.623733	-4.13045	3.62055e-05	0.000938927
BRCA	ENSG00000106829	TLE4	cg05989460	chr9:79573023	CGI:chr9:79570564-79573645	gene body,promoter	0.213288	0.40113	-2.60947	0.00906824	0.0257136	-0.187841	793.664	-1.49098	0.283018	-5.26816	1.37798e-07	1.29588e-05
BRCA	ENSG00000172159	FRMD3	cg02603128	chr9:83538011	CGI:chr9:83537438-83538862	gene body,promoter	0.242693	0.470363	-3.37636	0.000734519	0.00779885	-0.227671	533.463	-1.54834	0.413255	-3.7467	0.000179173	0.00322728
BRCA	ENSG00000148053	NTRK2	cg01009697	chr9:84668555	CGI:chr9:84668263-84670789	gene body,UTR,exon,promoter	0.071322	0.207793	-1.98893	0.0467084	0.0487008	-0.136471	3855.46	-1.71906	0.542963	-3.16608	0.0015451	0.0154977
BRCA	ENSG00000148053	NTRK2	cg03628748	chr9:84670218	CGI:chr9:84668263-84670789	gene body,promoter	0.331446	0.499397	-2.05333	0.0400406	0.0460048	-0.167951	3855.46	-1.71906	0.542963	-3.16608	0.0015451	0.0154977
BRCA	ENSG00000131668	BARX1	cg00418027	chr9:93954716	CGI:chr9:93951044-93955904	gene body,promoter	0.280281	0.400651	-2.01089	0.0443373	0.0477648	-0.12037	71.7315	-4.62719	0.756296	-6.11822	9.46244e-10	2.71039e-07
BRCA	ENSG00000131668	BARX1	cg05385163	chr9:93955067	CGI:chr9:93951044-93955904	gene body,CDS,exon,promoter	0.264433	0.426203	-2.38555	0.0170536	0.032876	-0.16177	71.7315	-4.62719	0.756296	-6.11822	9.46244e-10	2.71039e-07
BRCA	ENSG00000081377	CDC14B	cg13689681	chr9:96619922	CGI:chr9:96618532-96619954	promoter	0.122732	0.330475	-2.26554	0.0234795	0.0371579	-0.207743	716.006	-1.03401	0.247288	-4.18138	2.89748e-05	0.000796959
BRCA	ENSG00000081377	CDC14B	cg23861715	chr9:96619953	CGI:chr9:96618532-96619954	promoter	0.119928	0.413179	-2.37823	0.0173958	0.0331287	-0.293251	716.006	-1.03401	0.247288	-4.18138	2.89748e-05	0.000796959
BRCA	ENSG00000119514	GALNT12	cg22447839	chr9:98807561	CGI:chr9:98807620-98808067	promoter	0.174675	0.440463	-2.9534	0.00314295	0.0167891	-0.265788	198.809	-1.43792	0.422803	-3.40092	0.000671588	0.00846855
BRCA	ENSG00000106927	AMBP	cg06630567	chr9:114078155	CGI:chr9:114098040-114099311	gene body,CDS,exon,promoter	0.477663	0.628827	-2.66655	0.00766346	0.0241424	-0.151164	113.849	-2.71785	0.579818	-4.68742	2.76671e-06	0.000136186
BRCA	ENSG00000106927	AMBP	cg25420952	chr9:114078804	CGI:chr9:114098040-114099311	promoter	0.735925	0.867708	-3.06609	0.00216877	0.0141837	-0.131783	113.849	-2.71785	0.579818	-4.68742	2.76671e-06	0.000136186
BRCA	ENSG00000056558	TRAF1	cg14580859	chr9:120929572	CGI:chr9:120928493-120929397	promoter	0.587958	0.48453	2.22456	0.0261106	0.0387353	0.103428	991.771	-1.29232	0.283474	-4.55885	5.14341e-06	0.000218296
BRCA	ENSG00000148346	LCN2	cg14615559	chr9:128149298	CGI:chr9:128159938-128160866	gene body,promoter	0.411594	0.599064	-2.78656	0.00532711	0.0209052	-0.18747	1393.47	-5.69204	0.736212	-7.73152	1.06268e-14	1.35628e-11
BRCA	ENSG00000148346	LCN2	cg22438810	chr9:128149513	CGI:chr9:128159938-128160866	gene body,UTR,exon,promoter	0.515144	0.715246	-3.39539	0.000685321	0.00743923	-0.200102	1393.47	-5.69204	0.736212	-7.73152	1.06268e-14	1.35628e-11
BRCA	ENSG00000130707	ASS1	cg11045524	chr9:130445394	CGI:chr9:130444477-130445423	gene body,promoter	0.128774	0.276778	-2.87437	0.00404835	0.0187098	-0.148003	6556.95	-2.9415	0.43507	-6.76097	1.37069e-11	8.81471e-09
BRCA	ENSG00000130707	ASS1	cg13597397	chr9:130445561	CGI:chr9:130444477-130445423	gene body,promoter	0.126987	0.292256	-3.5915	0.000328783	0.0044558	-0.165269	6556.95	-2.9415	0.43507	-6.76097	1.37069e-11	8.81471e-09
BRCA	ENSG00000115257	PCSK4	cg22759185	chr19:1492039	CGI:chr19:1490389-1491807	promoter	0.491075	0.378372	2.27286	0.0230347	0.036911	0.112703	329.484	1.15246	0.396807	2.90434	0.00368028	0.0285661
BRCA	ENSG00000167772	ANGPTL4	cg02505409	chr19:8364276	CGI:chr19:8364081-8364608	gene body,UTR,exon,promoter	0.0577035	0.187111	-2.26408	0.0235693	0.0372183	-0.129407	1144.18	-1.50526	0.491624	-3.06181	0.0022	0.019944
BRCA	ENSG00000167772	ANGPTL4	cg17695543	chr19:8364730	CGI:chr19:8364081-8364608	gene body,promoter	0.256647	0.526877	-3.58125	0.00034195	0.00458691	-0.270231	1144.18	-1.50526	0.491624	-3.06181	0.0022	0.019944
BRCA	ENSG00000090339	ICAM1	cg02497902	chr19:10270134	CGI:chr19:10269611-10271289	promoter	0.129874	0.301358	-3.48466	0.000492762	0.00599622	-0.171484	3028.9	-1.08215	0.344253	-3.14348	0.00166953	0.0163908
BRCA	ENSG00000104998	IL27RA	cg19282782	chr19:14030286	CGI:chr19:14031586-14032165	promoter	0.873759	0.754795	2.78217	0.00539972	0.0210361	0.118963	1415.44	-1.41323	0.368279	-3.8374	0.000124341	0.00245224
BRCA	ENSG00000104998	IL27RA	cg23179657	chr19:14030722	CGI:chr19:14031586-14032165	promoter	0.783254	0.66293	2.35043	0.0187519	0.0341248	0.120324	1415.44	-1.41323	0.368279	-3.8374	0.000124341	0.00245224
BRCA	ENSG00000105639	JAK3	cg21988119	chr19:17848128	CGI:chr19:17847693-17847999	promoter	0.586229	0.689277	-2.28896	0.0220818	0.0363414	-0.103048	901.035	-1.30147	0.356543	-3.65024	0.000261999	0.00432263
BRCA	ENSG00000105639	JAK3	cg02285920	chr19:17848147	CGI:chr19:17847693-17847999	promoter	0.585984	0.713234	-2.6402	0.00828559	0.0248594	-0.127249	901.035	-1.30147	0.356543	-3.65024	0.000261999	0.00432263
BRCA	ENSG00000105639	JAK3	cg03491584	chr19:17848152	CGI:chr19:17847693-17847999	promoter	0.496081	0.616976	-2.24359	0.0248589	0.0380012	-0.120894	901.035	-1.30147	0.356543	-3.65024	0.000261999	0.00432263
BRCA	ENSG00000105639	JAK3	cg01089639	chr19:17848237	CGI:chr19:17847693-17847999	promoter	0.575814	0.684662	-2.11773	0.0341983	0.0432156	-0.108848	901.035	-1.30147	0.356543	-3.65024	0.000261999	0.00432263
BRCA	ENSG00000256229	ZNF486	cg24749688	chr19:20167335	CGI:chr19:20051963-20052298	gene body,CDS,exon,promoter	0.20364	0.0945175	2.71045	0.00671911	0.0228889	0.109122	1219.85	2.47881	0.42119	5.88527	3.97409e-09	7.92729e-07
BRCA	ENSG00000189001	SBSN	cg20080548	chr19:35529298	CGI:chr19:35533280-35533901	promoter	0.689496	0.868545	-3.31196	0.000926434	0.00900825	-0.179049	135.774	-4.27746	0.936	-4.56994	4.87859e-06	0.000210007
BRCA	ENSG00000189001	SBSN	cg23680518	chr19:35529330	CGI:chr19:35533280-35533901	promoter	0.526936	0.653676	-2.02406	0.042964	0.047218	-0.12674	135.774	-4.27746	0.936	-4.56994	4.87859e-06	0.000210007
BRCA	ENSG00000104814	MAP4K1	cg15679651	chr19:38617889	CGI:chr19:38618792-38619222	gene body,CDS,exon,promoter	0.455763	0.593228	-2.28018	0.0225972	0.0366413	-0.137465	526.491	-1.08212	0.360866	-2.99867	0.0027116	0.0231572
BRCA	ENSG00000161243	FBXO27	cg02992311	chr19:39032986	CGI:chr19:39031624-39032587	promoter	0.374854	0.260054	2.3636	0.0180984	0.0336571	0.1148	571.214	-1.18236	0.381968	-3.09545	0.00196517	0.0183348
BRCA	ENSG00000188505	NCCRP1	cg12574296	chr19:39196458	CGI:chr19:39196957-39197324	promoter	0.519022	0.630412	-2.22895	0.025817	0.0385663	-0.11139	918.669	-4.93308	0.73388	-6.72191	1.79354e-11	1.06823e-08
BRCA	ENSG00000188505	NCCRP1	cg19917856	chr19:39197323	CGI:chr19:39196957-39197324	gene body,promoter	0.358881	0.546543	-2.70167	0.00689916	0.0231212	-0.187662	918.669	-4.93308	0.73388	-6.72191	1.79354e-11	1.06823e-08
BRCA	ENSG00000105369	CD79A	cg05921699	chr19:41876655	CGI:chr19:41882798-41884656	promoter	0.718778	0.526534	3.32806	0.000874521	0.00869923	0.192244	812.128	-2.65337	0.608648	-4.35944	1.30395e-05	0.000435496
BRCA	ENSG00000105369	CD79A	cg19583076	chr19:41877029	CGI:chr19:41882798-41884656	promoter	0.549302	0.435902	2.65923	0.00783193	0.0243377	0.1134	812.128	-2.65337	0.608648	-4.35944	1.30395e-05	0.000435496
BRCA	ENSG00000189377	CXCL17	cg03003745	chr19:42444015	CGI:chr19:42423133-42424446	promoter	0.367836	0.248631	2.89779	0.00375807	0.018155	0.119205	1444.09	-4.17798	0.747646	-5.58818	2.29463e-08	3.336e-06
BRCA	ENSG00000189377	CXCL17	cg16512640	chr19:42444031	CGI:chr19:42423133-42424446	promoter	0.448798	0.309362	2.62264	0.00872508	0.0253688	0.139437	1444.09	-4.17798	0.747646	-5.58818	2.29463e-08	3.336e-06
BRCA	ENSG00000104951	IL4I1	cg23878206	chr19:49928168	CGI:chr19:49929097-49929881	gene body,promoter	0.71538	0.82251	-2.68704	0.00720888	0.02355	-0.10713	695.787	-1.24856	0.402606	-3.1012	0.00192738	0.0181665
BRCA	ENSG00000167754	KLK5	cg04349727	chr19:50954133	CGI:chr19:50912746-50912993	promoter	0.578789	0.444344	2.01235	0.0441829	0.0477051	0.134445	1270.91	-4.23889	0.847057	-5.00426	5.60781e-07	3.91408e-05
BRCA	ENSG00000167755	KLK6	cg25463943	chr19:50970870	CGI:chr19:51002658-51003107	promoter	0.684412	0.538484	2.70314	0.00686885	0.0230855	0.145928	783.607	-5.30742	0.857617	-6.18856	6.07148e-10	1.80809e-07
BRCA	ENSG00000169035	KLK7	cg26241993	chr19:50983989	CGI:chr19:51002658-51003107	gene body,UTR,exon,promoter	0.442391	0.575549	-2.43385	0.0149393	0.0312279	-0.133158	667.805	-4.82118	0.855528	-5.63533	1.74724e-08	2.71336e-06
BRCA	ENSG00000129455	KLK8	cg26651782	chr19:51002523	CGI:chr19:51002658-51003107	gene body,UTR,exon,promoter	0.443524	0.61763	-2.3958	0.0165843	0.0325133	-0.174106	143.369	-3.67919	0.876564	-4.19729	2.70134e-05	0.00075536
BRCA	ENSG00000129455	KLK8	cg20103311	chr19:51003632	CGI:chr19:51002658-51003107	promoter	0.430479	0.323563	2.14846	0.0316773	0.0419176	0.106916	143.369	-3.67919	0.876564	-4.19729	2.70134e-05	0.00075536
BRCA	ENSG00000129451	KLK10	cg11170179	chr19:51019511	CGI:chr19:51018748-51019547	gene body,promoter	0.244798	0.393495	-2.25676	0.024023	0.0374955	-0.148696	930.462	-4.84008	0.800488	-6.0464	1.48115e-09	3.78073e-07
BRCA	ENSG00000129451	KLK10	cg17766007	chr19:51019665	CGI:chr19:51018748-51019547	gene body,UTR,exon,promoter	0.108701	0.250161	-3.45832	0.000543561	0.00641169	-0.14146	930.462	-4.84008	0.800488	-6.0464	1.48115e-09	3.78073e-07
BRCA	ENSG00000129437	KLK14	cg25263454	chr19:51084152	CGI:chr19:51098565-51099184	gene body,UTR,exon,promoter	0.569349	0.413413	2.3314	0.0197323	0.0347686	0.155937	170.21	-3.57921	0.740587	-4.83294	1.34532e-06	7.75424e-05
BRCA	ENSG00000196263	ZNF471	cg24713204	chr19:56508004	CGI:chr19:56507374-56508137	gene body,promoter	0.381257	0.574999	-3.15244	0.00161912	0.0122175	-0.193742	470.573	-1.28591	0.357195	-3.60002	0.000318195	0.0049827
BRCA	ENSG00000196263	ZNF471	cg02823803	chr19:56508589	CGI:chr19:56507374-56508137	gene body,promoter	0.333269	0.449036	-2.46604	0.0136614	0.0300834	-0.115766	470.573	-1.28591	0.357195	-3.60002	0.000318195	0.0049827
BRCA	ENSG00000137265	IRF4	cg01108118	chr6:391189	CGI:chr6:391188-393802	promoter	0.392221	0.582269	-2.27286	0.0230347	0.036911	-0.190049	428.89	-2.6852	0.514733	-5.21669	1.82152e-07	1.61925e-05
BRCA	ENSG00000137265	IRF4	cg10379890	chr6:391208	CGI:chr6:391188-393802	promoter	0.459206	0.625475	-2.22164	0.0263079	0.0388645	-0.166269	428.89	-2.6852	0.514733	-5.21669	1.82152e-07	1.61925e-05
BRCA	ENSG00000137265	IRF4	cg12684209	chr6:393110	CGI:chr6:391188-393802	gene body,UTR,exon,promoter	0.453583	0.624011	-2.50263	0.0123273	0.0288815	-0.170428	428.89	-2.6852	0.514733	-5.21669	1.82152e-07	1.61925e-05
BRCA	ENSG00000153162	BMP6	cg07479491	chr6:7725875	CGI:chr6:7725862-7727928	promoter	0.128049	0.273967	-2.46897	0.0135502	0.0299794	-0.145918	237.091	-1.51574	0.410662	-3.69096	0.00022341	0.00383466
BRCA	ENSG00000172201	ID4	cg14151259	chr6:19836784	CGI:chr6:19836783-19839083	promoter	0.408552	0.60433	-2.60362	0.00922459	0.0258862	-0.195778	1528.58	-2.36207	0.520506	-4.53803	5.67835e-06	0.000233243
BRCA	ENSG00000079689	SCGN	cg16954341	chr6:25652153	CGI:chr6:25652230-25652481	promoter	0.357437	0.566638	-2.97974	0.0028849	0.0161798	-0.209201	89.2565	-3.38436	0.871962	-3.88132	0.000103891	0.00213246
BRCA	ENSG00000079689	SCGN	cg13586599	chr6:25652155	CGI:chr6:25652230-25652481	promoter	0.412869	0.629119	-3.03975	0.00236776	0.014767	-0.21625	89.2565	-3.38436	0.871962	-3.88132	0.000103891	0.00213246
BRCA	ENSG00000079689	SCGN	cg26718511	chr6:25652303	CGI:chr6:25652230-25652481	gene body,UTR,exon,promoter	0.190532	0.33981	-2.48361	0.0130059	0.0294813	-0.149278	89.2565	-3.38436	0.871962	-3.88132	0.000103891	0.00213246
BRCA	ENSG00000079689	SCGN	cg06493994	chr6:25652374	CGI:chr6:25652230-25652481	gene body,UTR,exon,promoter	0.249043	0.433281	-2.77924	0.00544863	0.0211221	-0.184239	89.2565	-3.38436	0.871962	-3.88132	0.000103891	0.00213246
BRCA	ENSG00000079689	SCGN	cg01230796	chr6:25652470	CGI:chr6:25652230-25652481	gene body,CDS,exon,promoter	0.157653	0.281856	-2.11626	0.0343226	0.0432843	-0.124204	89.2565	-3.38436	0.871962	-3.88132	0.000103891	0.00213246
BRCA	ENSG00000213886	UBD	cg07326586	chr6:29560342	CGI:chr6:29553333-29554056	promoter	0.420333	0.304131	2.13675	0.0326182	0.0423947	0.116202	616.292	-1.71229	0.605262	-2.829	0.00466937	0.0341655
BRCA	ENSG00000204642	HLA-F	cg19070841	chr6:29723866	CGI:chr6:29723329-29724316	gene body,CDS,exon,promoter	0.145559	0.261111	-2.2392	0.025143	0.0381569	-0.115551	4229.78	-1.20307	0.359817	-3.34357	0.000827073	0.0098259
BRCA	ENSG00000204632	HLA-G	cg19141489	chr6:29828291	CGI:chr6:29827776-29828817	gene body,CDS,exon,promoter	0.401275	0.545905	-2.14261	0.0321448	0.0421631	-0.14463	264.967	-1.30361	0.406892	-3.20382	0.00135618	0.0140477
BRCA	ENSG00000204632	HLA-G	cg23110482	chr6:29828837	CGI:chr6:29827776-29828817	gene body,promoter	0.832956	0.719325	2.63581	0.00839357	0.0249763	0.113631	264.967	-1.30361	0.406892	-3.20382	0.00135618	0.0140477
BRCA	ENSG00000204542	C6orf15	cg26812852	chr6:31113741	CGI:chr6:31158308-31158784	promoter	0.660591	0.776025	-2.40311	0.0162562	0.0322513	-0.115434	73.8709	-4.79802	0.892986	-5.37301	7.74327e-08	8.38526e-06
BRCA	ENSG00000204542	C6orf15	cg25746092	chr6:31113840	CGI:chr6:31158308-31158784	promoter	0.695059	0.8102	-2.25969	0.0238407	0.037385	-0.115141	73.8709	-4.79802	0.892986	-5.37301	7.74327e-08	8.38526e-06
BRCA	ENSG00000241106	HLA-DOB	cg10294956	chr6:32815068	CGI:chr6:32838507-32838892	UTR,gene body,promoter,CDS,exon	0.864324	0.72387	2.60069	0.00930366	0.0259602	0.140454	262.368	-2.08725	0.467813	-4.46172	8.13041e-06	0.000313767
BRCA	ENSG00000204267	TAP2	cg13563634	chr6:32837907	CGI:chr6:32838507-32838892	gene body,CDS,exon,promoter	0.477242	0.620557	-2.13675	0.0326182	0.0423947	-0.143314	2227.8	-1.10559	0.310073	-3.56558	0.000363052	0.00542717
BRCA	ENSG00000240065	PSMB9	cg12253437	chr6:32845671	CGI:chr6:32843717-32844062	gene body,promoter	0.661101	0.762151	-1.99186	0.0463862	0.0485895	-0.10105	2307.97	-1.00042	0.360955	-2.77159	0.00557835	0.0387384
BRCA	ENSG00000240065	PSMB9	cg13165140	chr6:32845745	CGI:chr6:32843717-32844062	gene body,promoter	0.667354	0.768238	-2.26261	0.0236595	0.0372693	-0.100883	2307.97	-1.00042	0.360955	-2.77159	0.00557835	0.0387384
BRCA	ENSG00000240065	PSMB9	cg02756056	chr6:32845805	CGI:chr6:32843717-32844062	gene body,promoter	0.669517	0.774866	-2.21871	0.0265065	0.0389714	-0.105349	2307.97	-1.00042	0.360955	-2.77159	0.00557835	0.0387384
BRCA	ENSG00000168394	TAP1	cg26033526	chr6:32852081	CGI:chr6:32853072-32854593	gene body,promoter	0.638506	0.77039	-1.99918	0.0455889	0.0482906	-0.131885	8686.84	-1.1516	0.349093	-3.29884	0.000970855	0.0110211
BRCA	ENSG00000168394	TAP1	cg17626301	chr6:32852424	CGI:chr6:32853072-32854593	gene body,CDS,exon,promoter	0.411932	0.535884	-2.39872	0.0164524	0.032415	-0.123952	8686.84	-1.1516	0.349093	-3.29884	0.000970855	0.0110211
BRCA	ENSG00000204248	COL11A2	cg01094192	chr6:33190820	CGI:chr6:33192214-33192555	gene body,promoter	0.679716	0.515156	2.55386	0.0106537	0.0273315	0.164559	191.726	-2.35553	0.595117	-3.95809	7.55513e-05	0.00166455
BRCA	ENSG00000204248	COL11A2	cg21232625	chr6:33193617	CGI:chr6:33193168-33193560	promoter	0.540634	0.672429	-2.32701	0.0199647	0.0349155	-0.131795	191.726	-2.35553	0.595117	-3.95809	7.55513e-05	0.00166455
BRCA	ENSG00000124772	CPNE5	cg18237405	chr6:36840206	CGI:chr6:36839105-36841032	promoter	0.141536	0.263582	-2.57142	0.0101283	0.0267869	-0.122047	363.748	-1.00766	0.357585	-2.81797	0.00483277	0.0350882
BRCA	ENSG00000197261	C6orf141	cg25518400	chr6:49549440	CGI:chr6:49550602-49551473	promoter	0.828289	0.648673	2.44409	0.0145217	0.0308568	0.179616	932.442	1.67278	0.549999	3.04142	0.00235461	0.0210014
BRCA	ENSG00000008196	TFAP2B	cg04310104	chr6:50818044	CGI:chr6:50819573-50820378	promoter	0.194363	0.367201	-2.53922	0.01111	0.0277608	-0.172838	4208.33	-2.83449	0.748445	-3.78717	0.000152373	0.00284791
BRCA	ENSG00000008196	TFAP2B	cg01610857	chr6:50819648	CGI:chr6:50819573-50820378	gene body,promoter	0.120278	0.255901	-2.03284	0.0420686	0.0468186	-0.135623	4208.33	-2.83449	0.748445	-3.78717	0.000152373	0.00284791
BRCA	ENSG00000008196	TFAP2B	cg09247060	chr6:50820090	CGI:chr6:50819573-50820378	gene body,promoter	0.266451	0.407924	-2.4397	0.0146994	0.0310208	-0.141473	4208.33	-2.83449	0.748445	-3.78717	0.000152373	0.00284791
BRCA	ENSG00000008196	TFAP2B	cg05928362	chr6:50820701	CGI:chr6:50819573-50820378	gene body,promoter	0.156055	0.336326	-2.04455	0.0408994	0.0463632	-0.180271	4208.33	-2.83449	0.748445	-3.78717	0.000152373	0.00284791
BRCA	ENSG00000112773	FAM46A	cg22388948	chr6:81750841	CGI:chr6:81751416-81754088	gene body,promoter	0.475221	0.662578	-2.5202	0.011729	0.0283462	-0.187357	2260	-1.06762	0.328765	-3.24736	0.0011648	0.0127004
BRCA	ENSG00000164434	FABP7	cg21020855	chr6:122779044	CGI:chr6:122789143-122789733	promoter	0.624943	0.752032	-2.0065	0.0448032	0.0479597	-0.127089	847.772	-7.12465	1.04442	-6.82163	9.00162e-12	6.7017e-09
BRCA	ENSG00000164434	FABP7	cg19097322	chr6:122779408	CGI:chr6:122789143-122789733	promoter	0.57808	0.777994	-3.08219	0.00205483	0.0138094	-0.199915	847.772	-7.12465	1.04442	-6.82163	9.00162e-12	6.7017e-09
BRCA	ENSG00000164434	FABP7	cg15042332	chr6:122779577	CGI:chr6:122789143-122789733	gene body,UTR,exon,promoter	0.620113	0.748539	-2.38555	0.0170536	0.032876	-0.128427	847.772	-7.12465	1.04442	-6.82163	9.00162e-12	6.7017e-09
BRCA	ENSG00000146374	RSPO3	cg19873382	chr6:127118394	CGI:chr6:127118120-127118451	promoter	0.166929	0.279322	-1.98015	0.0476863	0.0490657	-0.112393	232.732	-1.26518	0.41667	-3.0364	0.00239419	0.0211912
BRCA	ENSG00000146374	RSPO3	cg03983331	chr6:127120460	CGI:chr6:127120408-127120615	gene body,promoter	0.248609	0.440929	-2.47336	0.0133848	0.0298443	-0.19232	232.732	-1.26518	0.41667	-3.0364	0.00239419	0.0211912
BRCA	ENSG00000146374	RSPO3	cg06437464	chr6:127120559	CGI:chr6:127120408-127120615	gene body,promoter	0.340554	0.518981	-2.46458	0.0137173	0.0301352	-0.178427	232.732	-1.26518	0.41667	-3.0364	0.00239419	0.0211912
BRCA	ENSG00000079931	MOXD1	cg05235761	chr6:132400906	CGI:chr6:132400954-132401762	gene body,promoter	0.232562	0.415518	-3.06756	0.00215818	0.0141504	-0.182956	781.664	-1.06832	0.394251	-2.70976	0.00673324	0.0440867
BRCA	ENSG00000079931	MOXD1	cg01019028	chr6:132401671	CGI:chr6:132400954-132401762	promoter	0.219093	0.327341	-2.20554	0.0274164	0.0394832	-0.108249	781.664	-1.06832	0.394251	-2.70976	0.00673324	0.0440867
BRCA	ENSG00000079931	MOXD1	cg24645868	chr6:132402908	CGI:chr6:132400954-132401762	promoter	0.538571	0.374089	2.17919	0.0293173	0.0406104	0.164482	781.664	-1.06832	0.394251	-2.70976	0.00673324	0.0440867
BRCA	ENSG00000118495	PLAGL1	cg16334244	chr6:144065094	CGI:chr6:144063757-144064751	promoter	0.497685	0.638154	-2.21432	0.0268069	0.0391261	-0.140469	821.34	-1.08288	0.356299	-3.03926	0.00237164	0.0210716
BRCA	ENSG00000118495	PLAGL1	cg01595870	chr6:144065279	CGI:chr6:144063757-144064751	promoter	0.750369	0.881504	-2.44116	0.01464	0.0309764	-0.131135	821.34	-1.08288	0.356299	-3.03926	0.00237164	0.0210716
BRCA	ENSG00000118495	PLAGL1	cg09293391	chr6:144065281	CGI:chr6:144063757-144064751	promoter	0.691447	0.834568	-2.45873	0.013943	0.0303365	-0.143121	821.34	-1.08288	0.356299	-3.03926	0.00237164	0.0210716
BRCA	ENSG00000198729	PPP1R14C	cg20134151	chr6:150142364	CGI:chr6:150142635-150143866	promoter	0.356039	0.570346	-2.42068	0.0154917	0.0316642	-0.214307	598.357	-4.19688	0.712568	-5.8898	3.86668e-09	7.87944e-07
BRCA	ENSG00000198729	PPP1R14C	cg15146834	chr6:150142639	CGI:chr6:150142635-150143866	promoter	0.270213	0.550958	-3.44515	0.000570752	0.00662508	-0.280745	598.357	-4.19688	0.712568	-5.8898	3.86668e-09	7.87944e-07
BRCA	ENSG00000198729	PPP1R14C	cg18535445	chr6:150142981	CGI:chr6:150142635-150143866	promoter	0.174428	0.409266	-2.89193	0.00382881	0.0183053	-0.234837	598.357	-4.19688	0.712568	-5.8898	3.86668e-09	7.87944e-07
BRCA	ENSG00000198729	PPP1R14C	cg14884741	chr6:150143508	CGI:chr6:150142635-150143866	gene body,promoter	0.166998	0.462538	-3.62077	0.000293729	0.00409253	-0.29554	598.357	-4.19688	0.712568	-5.8898	3.86668e-09	7.87944e-07
BRCA	ENSG00000198729	PPP1R14C	cg21511194	chr6:150143854	CGI:chr6:150142635-150143866	gene body,promoter	0.261403	0.483042	-3.01194	0.00259583	0.0154225	-0.22164	598.357	-4.19688	0.712568	-5.8898	3.86668e-09	7.87944e-07
BRCA	ENSG00000198729	PPP1R14C	cg02250071	chr6:150143913	CGI:chr6:150142635-150143866	gene body,promoter	0.145361	0.295353	-2.33433	0.0195786	0.0346518	-0.149992	598.357	-4.19688	0.712568	-5.8898	3.86668e-09	7.87944e-07
BRCA	ENSG00000139193	CD27	cg18849517	chr12:6443926	CGI:chr12:6470389-6471263	promoter	0.532607	0.643581	-2.13236	0.0329772	0.0425852	-0.110974	346.111	-1.6639	0.451059	-3.68886	0.00022526	0.00385532
BRCA	ENSG00000013583	HEBP1	cg16789995	chr12:12999522	CGI:chr12:12999885-13001932	gene body,promoter	0.360498	0.24491	2.23773	0.0252384	0.038215	0.115588	5706.04	1.10437	0.335966	3.28715	0.00101205	0.0114163
BRCA	ENSG00000246705	H2AFJ	cg12806797	chr12:14773638	CGI:chr12:14774357-14775089	promoter	0.555054	0.371657	2.40019	0.0163867	0.0323608	0.183397	8926.86	1.30976	0.385262	3.39966	0.000674694	0.00850171
BRCA	ENSG00000029153	ARNTL2	cg26165146	chr12:27331723	CGI:chr12:27332750-27333743	promoter	0.55532	0.710395	-1.99918	0.0455889	0.0482906	-0.155074	847.181	-1.27693	0.407473	-3.13379	0.00172566	0.0168401
BRCA	ENSG00000161798	AQP5	cg03020208	chr12:49961179	CGI:chr12:49961056-49962380	promoter	0.403344	0.539278	-2.21578	0.0267065	0.0390749	-0.135935	874.442	-4.65452	0.84965	-5.47816	4.29764e-08	5.22383e-06
BRCA	ENSG00000161798	AQP5	cg12690246	chr12:49963086	CGI:chr12:49961056-49962380	gene body,promoter	0.371757	0.27096	2.50995	0.0120748	0.0286466	0.100796	874.442	-4.65452	0.84965	-5.47816	4.29764e-08	5.22383e-06
BRCA	ENSG00000170442	KRT86	cg14645027	chr12:52248922	CGI:chr12:52250198-52250627	promoter	0.50568	0.703092	-3.34709	0.00081665	0.00836074	-0.197412	323.291	-2.63513	0.576653	-4.56969	4.88437e-06	0.000210007
BRCA	ENSG00000186081	KRT5	cg00368577	chr12:52521280	CGI:chr12:52600988-52601528	promoter	0.39325	0.284674	2.77192	0.00557263	0.0212862	0.108576	13037.4	-3.96014	0.724155	-5.46864	4.53496e-08	5.40204e-06
BRCA	ENSG00000170477	KRT4	cg17667972	chr12:52814509	CGI:chr12:52789929-52790396	gene body,UTR,exon,promoter	0.536133	0.33616	2.96364	0.00304019	0.016545	0.199973	158.215	-5.94643	1.07348	-5.5394	3.03503e-08	4.11763e-06
BRCA	ENSG00000170477	KRT4	cg08009487	chr12:52814541	CGI:chr12:52789929-52790396	gene body,UTR,exon,promoter	0.371167	0.210589	2.97828	0.00289871	0.0162152	0.160577	158.215	-5.94643	1.07348	-5.5394	3.03503e-08	4.11763e-06
BRCA	ENSG00000170477	KRT4	cg21359793	chr12:52814968	CGI:chr12:52789929-52790396	promoter	0.536627	0.401806	1.99772	0.0457475	0.0483484	0.134821	158.215	-5.94643	1.07348	-5.5394	3.03503e-08	4.11763e-06
BRCA	ENSG00000170477	KRT4	cg12610744	chr12:52814978	CGI:chr12:52789929-52790396	promoter	0.604695	0.463148	2.33872	0.01935	0.0345017	0.141547	158.215	-5.94643	1.07348	-5.5394	3.03503e-08	4.11763e-06
BRCA	ENSG00000185640	KRT79	cg04050068	chr12:52834032	CGI:chr12:52874075-52874506	gene body,CDS,exon,promoter	0.627792	0.448779	2.43092	0.0150605	0.0313259	0.179013	38.5599	-2.905	0.824367	-3.52392	0.000425216	0.00606366
BRCA	ENSG00000135413	LACRT	cg26218982	chr12:54634972	CGI:chr12:54588149-54588807	promoter	0.877689	0.771203	2.65777	0.00786602	0.0243826	0.106486	127.148	-10.8337	1.7801	-6.08598	1.15784e-09	3.1346e-07
BRCA	ENSG00000161634	DCD	cg01687040	chr12:54649775	CGI:chr12:54588149-54588807	promoter	0.587873	0.426017	2.46604	0.0136614	0.0300834	0.161857	595.383	-8.12329	1.47118	-5.52162	3.35893e-08	4.41304e-06
BRCA	ENSG00000139266	2024-03-09	cg06761203	chr12:57754105	CGI:chr12:57755068-57755998	promoter	0.35926	0.254671	2.64899	0.00807337	0.0246129	0.104589	1213.72	1.05839	0.210358	5.03135	4.87026e-07	3.55095e-05
BRCA	ENSG00000139266	2024-03-09	cg17828445	chr12:57757059	CGI:chr12:57755068-57755998	gene body,CDS,exon,promoter	0.638713	0.799468	-2.78509	0.00535122	0.0209458	-0.160755	1213.72	1.05839	0.210358	5.03135	4.87026e-07	3.55095e-05
BRCA	ENSG00000156076	WIF1	cg03509412	chr12:65121241	CGI:chr12:65121098-65122083	gene body,UTR,exon,promoter	0.202929	0.347576	-2.07967	0.0375555	0.044798	-0.144646	188.911	-4.66529	0.937198	-4.97791	6.4274e-07	4.34383e-05
BRCA	ENSG00000156076	WIF1	cg26397188	chr12:65121496	CGI:chr12:65121098-65122083	gene body,UTR,exon,promoter	0.302967	0.487749	-2.42799	0.0151826	0.0314043	-0.184782	188.911	-4.66529	0.937198	-4.97791	6.4274e-07	4.34383e-05
BRCA	ENSG00000156076	WIF1	cg24166864	chr12:65121510	CGI:chr12:65121098-65122083	gene body,UTR,exon,promoter	0.300615	0.459508	-2.05626	0.0397577	0.0458758	-0.158893	188.911	-4.66529	0.937198	-4.97791	6.4274e-07	4.34383e-05
BRCA	ENSG00000127324	TSPAN8	cg17737641	chr12:71440686	CGI:chr12:71439412-71440609	gene body,promoter	0.176159	0.412911	-3.32075	0.000897774	0.00883345	-0.236752	251.094	-3.19458	0.818722	-3.90191	9.54371e-05	0.00198749
BRCA	ENSG00000127324	TSPAN8	cg21558545	chr12:71441079	CGI:chr12:71439412-71440609	gene body,promoter	0.131312	0.315126	-2.65191	0.00800372	0.0245414	-0.183813	251.094	-3.19458	0.818722	-3.90191	9.54371e-05	0.00198749
BRCA	ENSG00000256870	SLC5A8	cg05063104	chr12:101209551	CGI:chr12:101209609-101210155	gene body,CDS,exon,promoter	0.407133	0.556865	-2.44702	0.0144043	0.0307459	-0.149732	475.709	-6.65173	1.08748	-6.11665	9.55645e-10	2.71039e-07
BRCA	ENSG00000256870	SLC5A8	cg10141715	chr12:101209675	CGI:chr12:101209609-101210155	gene body,CDS,exon,promoter	0.369086	0.546086	-2.0226	0.0431148	0.0472767	-0.177001	475.709	-6.65173	1.08748	-6.11665	9.55645e-10	2.71039e-07
BRCA	ENSG00000256870	SLC5A8	cg20740029	chr12:101210057	CGI:chr12:101209609-101210155	gene body,UTR,exon,promoter	0.129271	0.364517	-2.91535	0.00355292	0.0177994	-0.235247	475.709	-6.65173	1.08748	-6.11665	9.55645e-10	2.71039e-07
BRCA	ENSG00000256870	SLC5A8	cg05722918	chr12:101210151	CGI:chr12:101209609-101210155	gene body,UTR,exon,promoter	0.177225	0.356971	-2.66655	0.00766346	0.0241424	-0.179745	475.709	-6.65173	1.08748	-6.11665	9.55645e-10	2.71039e-07
BRCA	ENSG00000256870	SLC5A8	cg21431690	chr12:101210154	CGI:chr12:101209609-101210155	gene body,UTR,exon,promoter	0.221262	0.392034	-2.90218	0.0037058	0.0180693	-0.170772	475.709	-6.65173	1.08748	-6.11665	9.55645e-10	2.71039e-07
BRCA	ENSG00000256870	SLC5A8	cg16178491	chr12:101210218	CGI:chr12:101209609-101210155	gene body,UTR,exon,promoter	0.18994	0.358906	-2.34165	0.019199	0.0343898	-0.168966	475.709	-6.65173	1.08748	-6.11665	9.55645e-10	2.71039e-07
BRCA	ENSG00000256870	SLC5A8	cg13433302	chr12:101210249	CGI:chr12:101209609-101210155	gene body,UTR,exon,promoter	0.191534	0.396352	-2.65923	0.00783193	0.0243377	-0.204818	475.709	-6.65173	1.08748	-6.11665	9.55645e-10	2.71039e-07
BRCA	ENSG00000256870	SLC5A8	cg12135976	chr12:101210369	CGI:chr12:101209609-101210155	gene body,UTR,exon,promoter	0.249603	0.392732	-2.37092	0.0177441	0.0334053	-0.143129	475.709	-6.65173	1.08748	-6.11665	9.55645e-10	2.71039e-07
BRCA	ENSG00000256870	SLC5A8	cg18841298	chr12:101210480	CGI:chr12:101209609-101210155	promoter	0.688306	0.859348	-2.10309	0.0354579	0.043846	-0.171042	475.709	-6.65173	1.08748	-6.11665	9.55645e-10	2.71039e-07
BRCA	ENSG00000111199	TRPV4	cg08114617	chr12:109833636	CGI:chr12:109833537-109833777	promoter	0.397952	0.500709	-2.59484	0.00946362	0.0261128	-0.102758	470.042	-1.43385	0.357042	-4.01591	5.92167e-05	0.00138115
BRCA	ENSG00000111344	RASAL1	cg15120925	chr12:113136004	CGI:chr12:113135172-113135953	gene body,promoter	0.180937	0.350225	-2.17627	0.0295353	0.040723	-0.169288	328.766	-3.0708	0.579309	-5.30081	1.15292e-07	1.14446e-05
BRCA	ENSG00000111344	RASAL1	cg05900810	chr12:113136261	CGI:chr12:113135172-113135953	promoter	0.107799	0.212808	-2.11041	0.0348233	0.0435216	-0.105009	328.766	-3.0708	0.579309	-5.30081	1.15292e-07	1.14446e-05
BRCA	ENSG00000176887	SOX11	cg08432727	chr2:5691590	CGI:chr2:5691055-5694076	promoter	0.247197	0.419483	-2.1748	0.0296449	0.0407842	-0.172286	1032.14	-2.63124	0.662989	-3.96875	7.2252e-05	0.00159975
BRCA	ENSG00000176887	SOX11	cg18449120	chr2:5692750	CGI:chr2:5691055-5694076	gene body,CDS,exon,promoter	0.50097	0.685405	-2.47044	0.0134949	0.0299322	-0.184435	1032.14	-2.63124	0.662989	-3.96875	7.2252e-05	0.00159975
BRCA	ENSG00000176887	SOX11	cg08165221	chr2:5692885	CGI:chr2:5691055-5694076	gene body,CDS,exon,promoter	0.234784	0.39644	-2.12504	0.033583	0.0428904	-0.161656	1032.14	-2.63124	0.662989	-3.96875	7.2252e-05	0.00159975
BRCA	ENSG00000176887	SOX11	cg24837370	chr2:5693642	CGI:chr2:5691055-5694076	gene body,CDS,exon,promoter	0.49043	0.739031	-2.03577	0.0417737	0.0466967	-0.248601	1032.14	-2.63124	0.662989	-3.96875	7.2252e-05	0.00159975
BRCA	ENSG00000176887	SOX11	cg20401252	chr2:5693930	CGI:chr2:5691055-5694076	gene body,CDS,exon,promoter	0.312008	0.524631	-2.80997	0.00495455	0.0202883	-0.212623	1032.14	-2.63124	0.662989	-3.96875	7.2252e-05	0.00159975
BRCA	ENSG00000176887	SOX11	cg16330247	chr2:5694506	CGI:chr2:5691055-5694076	gene body,UTR,exon,promoter	0.397408	0.614594	-2.92706	0.00342187	0.0174802	-0.217187	1032.14	-2.63124	0.662989	-3.96875	7.2252e-05	0.00159975
BRCA	ENSG00000115758	ODC1	cg01381586	chr2:10447501	CGI:chr2:10447701-10449029	gene body,UTR,exon,promoter	0.38278	0.537005	-2.18066	0.0292088	0.0405381	-0.154225	3255.71	-1.24549	0.310466	-4.01166	6.02924e-05	0.00139547
BRCA	ENSG00000143882	ATP6V1C2	cg00454409	chr2:10721240	CGI:chr2:10721080-10722256	promoter	0.134749	0.262827	-2.37238	0.0176739	0.0333511	-0.128079	351.422	-1.42123	0.468229	-3.03533	0.00240272	0.0212533
BRCA	ENSG00000134323	MYCN	cg10429747	chr2:15939999	CGI:chr2:15939679-15942910	promoter	0.04097	0.174231	-3.0778	0.00208535	0.0139084	-0.133261	180.336	-1.8452	0.545194	-3.38448	0.000713122	0.00880585
BRCA	ENSG00000134323	MYCN	cg02905871	chr2:15941044	CGI:chr2:15939679-15942910	gene body,promoter	0.0868446	0.216857	-2.0987	0.0358434	0.0440171	-0.130012	180.336	-1.8452	0.545194	-3.38448	0.000713122	0.00880585
BRCA	ENSG00000134323	MYCN	cg06520300	chr2:15941702	CGI:chr2:15939679-15942910	gene body,promoter	0.188311	0.455581	-2.76021	0.00577635	0.0216072	-0.26727	180.336	-1.8452	0.545194	-3.38448	0.000713122	0.00880585
BRCA	ENSG00000134323	MYCN	cg08884624	chr2:15941900	CGI:chr2:15939679-15942910	gene body,promoter	0.134372	0.344846	-2.21578	0.0267065	0.0390749	-0.210474	180.336	-1.8452	0.545194	-3.38448	0.000713122	0.00880585
BRCA	ENSG00000134323	MYCN	cg13131095	chr2:15942063	CGI:chr2:15939679-15942910	gene body,UTR,exon,promoter	0.119946	0.301409	-1.96698	0.0491853	0.049612	-0.181463	180.336	-1.8452	0.545194	-3.38448	0.000713122	0.00880585
BRCA	ENSG00000134323	MYCN	cg18032533	chr2:15942355	CGI:chr2:15939679-15942910	gene body,CDS,exon,promoter	0.141857	0.299148	-2.77046	0.00559774	0.0213322	-0.157291	180.336	-1.8452	0.545194	-3.38448	0.000713122	0.00880585
BRCA	ENSG00000163032	VSNL1	cg18735601	chr2:17540497	CGI:chr2:17540270-17540754	gene body,promoter	0.123639	0.253801	-2.59191	0.00954452	0.0261936	-0.130163	400.867	-1.73216	0.510668	-3.39194	0.000693986	0.00863369
BRCA	ENSG00000163032	VSNL1	cg19570640	chr2:17540499	CGI:chr2:17540270-17540754	gene body,promoter	0.15323	0.294359	-2.20554	0.0274164	0.0394832	-0.141129	400.867	-1.73216	0.510668	-3.39194	0.000693986	0.00863369
BRCA	ENSG00000158125	XDH	cg26767897	chr2:31414482	CGI:chr2:31580223-31581334	gene body,promoter	0.55664	0.412561	2.28603	0.0222524	0.0364512	0.144079	551.919	-1.90513	0.555028	-3.4325	0.000598037	0.00774613
BRCA	ENSG00000138083	SIX3	cg02147764	chr2:44942542	CGI:chr2:44942366-44944745	gene body,CDS,exon,promoter	0.303632	0.499118	-2.81876	0.00482103	0.0200343	-0.195487	157.412	-2.44448	0.800266	-3.05458	0.00225374	0.0202565
BRCA	ENSG00000119866	BCL11A	cg15091323	chr2:60553339	CGI:chr2:60553775-60555149	gene body,UTR,exon,promoter	0.27586	0.426379	-2.22456	0.0261106	0.0387353	-0.150518	573.374	-4.30913	0.62593	-6.88437	5.80438e-12	4.50925e-09
BRCA	ENSG00000119866	BCL11A	cg22166290	chr2:60553348	CGI:chr2:60553775-60555149	gene body,UTR,exon,promoter	0.264253	0.39546	-2.04162	0.0411891	0.0464815	-0.131206	573.374	-4.30913	0.62593	-6.88437	5.80438e-12	4.50925e-09
BRCA	ENSG00000003137	CYP26B1	cg14932468	chr2:72146785	CGI:chr2:72143992-72150046	gene body,promoter	0.332606	0.489402	-2.44556	0.0144629	0.0308032	-0.156796	352.602	-1.22818	0.407219	-3.01602	0.00256116	0.0222365
BRCA	ENSG00000003137	CYP26B1	cg13948082	chr2:72147129	CGI:chr2:72143992-72150046	gene body,promoter	0.377994	0.675209	-2.7529	0.00590706	0.0217895	-0.297216	352.602	-1.22818	0.407219	-3.01602	0.00256116	0.0222365
BRCA	ENSG00000003137	CYP26B1	cg04884908	chr2:72147711	CGI:chr2:72143992-72150046	gene body,CDS,exon,promoter	0.189277	0.309981	-2.57727	0.00995832	0.0266212	-0.120703	352.602	-1.22818	0.407219	-3.01602	0.00256116	0.0222365
BRCA	ENSG00000003137	CYP26B1	cg08641090	chr2:72148012	CGI:chr2:72143992-72150046	gene body,UTR,exon,promoter	0.391128	0.611567	-3.67931	0.000233866	0.00341996	-0.220438	352.602	-1.22818	0.407219	-3.01602	0.00256116	0.0222365
BRCA	ENSG00000152284	TCF7L1	cg13303069	chr2:85134719	CGI:chr2:85132833-85135470	gene body,promoter	0.326676	0.455356	-2.07528	0.0379603	0.0449948	-0.12868	2049.84	-1.71409	0.390189	-4.39297	1.11812e-05	0.000394056
BRCA	ENSG00000172005	MAL	cg09983051	chr2:95025483	CGI:chr2:95025112-95026686	promoter	0.348184	0.5145	-2.75729	0.00582832	0.0216733	-0.166315	80.9308	-2.41359	0.556791	-4.33483	1.45875e-05	0.000476246
BRCA	ENSG00000172005	MAL	cg04804539	chr2:95025510	CGI:chr2:95025112-95026686	promoter	0.311778	0.520247	-3.02219	0.00250957	0.0151876	-0.208468	80.9308	-2.41359	0.556791	-4.33483	1.45875e-05	0.000476246
BRCA	ENSG00000172005	MAL	cg07224914	chr2:95025902	CGI:chr2:95025112-95026686	gene body,promoter	0.167959	0.344207	-3.08804	0.00201478	0.013683	-0.176248	80.9308	-2.41359	0.556791	-4.33483	1.45875e-05	0.000476246
BRCA	ENSG00000172005	MAL	cg17626405	chr2:95026265	CGI:chr2:95025112-95026686	gene body,promoter	0.330474	0.506437	-2.55971	0.0104759	0.0271478	-0.175963	80.9308	-2.41359	0.556791	-4.33483	1.45875e-05	0.000476246
BRCA	ENSG00000172005	MAL	cg09712683	chr2:95026607	CGI:chr2:95025112-95026686	gene body,promoter	0.192639	0.323947	-2.13821	0.0324993	0.0423403	-0.131308	80.9308	-2.41359	0.556791	-4.33483	1.45875e-05	0.000476246
BRCA	ENSG00000125538	IL1B	cg20157753	chr2:112836766	CGI:chr2:112764341-112764997	gene body,UTR,exon,promoter	0.453916	0.655159	-2.71192	0.00668952	0.0228521	-0.201242	282.801	-1.09524	0.376358	-2.91011	0.00361304	0.0282282
BRCA	ENSG00000163064	EN1	cg17167253	chr2:118845807	CGI:chr2:118845040-118848010	gene body,promoter	0.427332	0.640526	-2.90218	0.0037058	0.0180693	-0.213194	943.29	-3.2112	0.693179	-4.63257	3.61154e-06	0.000167179
BRCA	ENSG00000163064	EN1	cg04960603	chr2:118846737	CGI:chr2:118845040-118848010	gene body,CDS,exon,promoter	0.203437	0.309311	-2.01674	0.0437225	0.0475406	-0.105875	943.29	-3.2112	0.693179	-4.63257	3.61154e-06	0.000167179
BRCA	ENSG00000163064	EN1	cg22714777	chr2:118847653	CGI:chr2:118845040-118848010	gene body,UTR,exon,promoter	0.263294	0.397156	-2.36799	0.0178851	0.0335135	-0.133862	943.29	-3.2112	0.693179	-4.63257	3.61154e-06	0.000167179
BRCA	ENSG00000163064	EN1	cg08050360	chr2:118848231	CGI:chr2:118845040-118848010	promoter	0.187093	0.33696	-2.74265	0.00609453	0.0220391	-0.149868	943.29	-3.2112	0.693179	-4.63257	3.61154e-06	0.000167179
BRCA	ENSG00000163064	EN1	cg07419575	chr2:118848383	CGI:chr2:118848462-118848737	promoter	0.239742	0.38753	-3.3866	0.000707634	0.00760991	-0.147789	943.29	-3.2112	0.693179	-4.63257	3.61154e-06	0.000167179
BRCA	ENSG00000163064	EN1	cg03266453	chr2:118848479	CGI:chr2:118848462-118848737	promoter	0.330027	0.544082	-2.68411	0.0072723	0.023643	-0.214055	943.29	-3.2112	0.693179	-4.63257	3.61154e-06	0.000167179
BRCA	ENSG00000163064	EN1	cg19613432	chr2:118848575	CGI:chr2:118848462-118848737	promoter	0.334514	0.510352	-2.89779	0.00375807	0.018155	-0.175838	943.29	-3.2112	0.693179	-4.63257	3.61154e-06	0.000167179
BRCA	ENSG00000163064	EN1	cg18962237	chr2:118848925	CGI:chr2:118848993-118849250	promoter	0.331527	0.527934	-3.52125	0.000429519	0.00541761	-0.196407	943.29	-3.2112	0.693179	-4.63257	3.61154e-06	0.000167179
BRCA	ENSG00000019169	MARCO	cg11009736	chr2:118942106	CGI:chr2:119011567-119011820	promoter	0.326147	0.130584	3.20366	0.00135691	0.0111592	0.195562	375.184	-2.6901	0.681394	-3.94794	7.88276e-05	0.00171558
BRCA	ENSG00000019169	MARCO	cg19284751	chr2:118942213	CGI:chr2:119011567-119011820	gene body,UTR,exon,promoter	0.483768	0.324569	2.47044	0.0134949	0.0299322	0.159199	375.184	-2.6901	0.681394	-3.94794	7.88276e-05	0.00171558
BRCA	ENSG00000197635	DPP4	cg14022057	chr2:162073665	CGI:chr2:162073723-162074369	gene body,promoter	0.486409	0.596887	-2.26115	0.0237499	0.0373257	-0.110478	661.784	-1.59645	0.384875	-4.14796	3.35455e-05	0.000889305
BRCA	ENSG00000197635	DPP4	cg10112391	chr2:162073866	CGI:chr2:162073723-162074369	gene body,promoter	0.298282	0.460276	-2.41189	0.0158699	0.0319669	-0.161994	661.784	-1.59645	0.384875	-4.14796	3.35455e-05	0.000889305
BRCA	ENSG00000144355	DLX1	cg15236866	chr2:172084097	CGI:chr2:172084514-172085398	promoter	0.419508	0.575676	-2.10016	0.0357145	0.0439612	-0.156168	180.779	-2.11943	0.78023	-2.71642	0.00659929	0.0434705
BRCA	ENSG00000144451	SPAG16	cg18764015	chr2:213284132	CGI:chr2:213284233-213284702	promoter	0.208247	0.102706	2.28457	0.0223382	0.0364873	0.10554	982.601	1.82528	0.372652	4.89807	9.67814e-07	5.96307e-05
BRCA	ENSG00000115596	WNT6	cg05985303	chr2:218858982	CGI:chr2:218858979-218860287	promoter	0.570713	0.68898	-2.33725	0.019426	0.034547	-0.118267	112.581	-3.78808	0.709708	-5.33752	9.42271e-08	9.84591e-06
BRCA	ENSG00000115596	WNT6	cg11175192	chr2:218860195	CGI:chr2:218858979-218860287	gene body,promoter	0.240312	0.426633	-3.0456	0.00232215	0.0146352	-0.186322	112.581	-3.78808	0.709708	-5.33752	9.42271e-08	9.84591e-06
BRCA	ENSG00000115596	WNT6	cg11511777	chr2:218861236	CGI:chr2:218858979-218860287	gene body,promoter	0.645129	0.745683	-2.25237	0.0242989	0.037661	-0.100555	112.581	-3.78808	0.709708	-5.33752	9.42271e-08	9.84591e-06
BRCA	ENSG00000175084	DES	cg03583111	chr2:219418720	CGI:chr2:219418478-219419028	gene body,CDS,exon,promoter	0.426888	0.550659	-2.34018	0.0192744	0.0344447	-0.123771	198.574	-3.17423	0.649471	-4.88741	1.02172e-06	6.20156e-05
BRCA	ENSG00000116106	EPHA4	cg03776464	chr2:221572227	CGI:chr2:221571010-221574221	gene body,CDS,exon,promoter	0.116898	0.33334	-2.27725	0.0227713	0.0367466	-0.216442	751.902	-1.13296	0.378415	-2.99398	0.00275366	0.0234186
BRCA	ENSG00000116106	EPHA4	cg08965464	chr2:221572265	CGI:chr2:221571010-221574221	gene body,UTR,exon,promoter	0.082467	0.294795	-2.548	0.0108342	0.0274995	-0.212328	751.902	-1.13296	0.378415	-2.99398	0.00275366	0.0234186
BRCA	ENSG00000116106	EPHA4	cg24372550	chr2:221572320	CGI:chr2:221571010-221574221	gene body,UTR,exon,promoter	0.0758903	0.209473	-2.11187	0.0346975	0.0434585	-0.133582	751.902	-1.13296	0.378415	-2.99398	0.00275366	0.0234186
BRCA	ENSG00000116106	EPHA4	cg08625382	chr2:221572667	CGI:chr2:221571010-221574221	gene body,promoter	0.0813708	0.233296	-2.01967	0.0434177	0.0474063	-0.151925	751.902	-1.13296	0.378415	-2.99398	0.00275366	0.0234186
BRCA	ENSG00000116106	EPHA4	cg15808558	chr2:221572891	CGI:chr2:221571010-221574221	gene body,promoter	0.0808756	0.204356	-3.42173	0.000622243	0.00701133	-0.123481	751.902	-1.13296	0.378415	-2.99398	0.00275366	0.0234186
BRCA	ENSG00000115009	CCL20	cg08575688	chr2:227813784	CGI:chr2:227871514-227871828	promoter	0.664141	0.511624	2.34311	0.0191238	0.0343498	0.152516	79.857	-2.82409	0.591365	-4.77554	1.79225e-06	9.55936e-05
BRCA	ENSG00000135916	ITM2C	cg16819369	chr2:230865019	CGI:chr2:230864858-230866106	gene body,UTR,exon,promoter	0.133712	0.265108	-2.24798	0.0245775	0.0378249	-0.131396	3726.63	-1.21735	0.342997	-3.54915	0.000386479	0.00568831
BRCA	ENSG00000171551	ECEL1	cg15986413	chr2:232488066	CGI:chr2:232485568-232488264	promoter	0.512294	0.620681	-2.43238	0.0149998	0.0312705	-0.108386	98.2781	-2.69503	0.553964	-4.865	1.14459e-06	6.77496e-05
BRCA	ENSG00000130294	KIF1A	cg12431299	chr2:240818865	CGI:chr2:240818724-240821366	gene body,UTR,exon,promoter	0.479499	0.607884	-2.01528	0.0438755	0.0475888	-0.128386	1095.14	-5.91056	0.854211	-6.91933	4.53801e-12	4.05425e-09
BRCA	ENSG00000130294	KIF1A	cg25834415	chr2:240819388	CGI:chr2:240818724-240821366	gene body,promoter	0.271148	0.536724	-3.09829	0.00194641	0.0134381	-0.265576	1095.14	-5.91056	0.854211	-6.91933	4.53801e-12	4.05425e-09
BRCA	ENSG00000157765	SLC34A2	cg21200703	chr4:25656006	CGI:chr4:25655497-25655925	gene body,promoter	0.391865	0.562882	-2.10602	0.0352029	0.0437179	-0.171017	2658.63	-4.77878	0.764324	-6.2523	4.04457e-10	1.36356e-07
BRCA	ENSG00000121895	TMEM156	cg02131853	chr4:39033017	CGI:chr4:39044566-39045448	promoter	0.279577	0.175403	2.68265	0.0073042	0.0236904	0.104174	166.556	-1.71937	0.499906	-3.43939	0.000583025	0.00759847
BRCA	ENSG00000154277	UCHL1	cg09921610	chr4:41257849	CGI:chr4:41256742-41257850	gene body,promoter	0.3264	0.467862	-2.08845	0.0367568	0.0444325	-0.141462	1085.04	-1.6837	0.523021	-3.21918	0.00128557	0.013568
BRCA	ENSG00000109205	ODAM	cg23449588	chr4:70198129	CGI:chr4:70688137-70688756	gene body,CDS,exon,promoter	0.542431	0.397555	2.27725	0.0227713	0.0367466	0.144876	38.0845	-4.16134	0.986972	-4.21627	2.48376e-05	0.00071812
BRCA	ENSG00000081041	CXCL2	cg26013975	chr4:74100038	CGI:chr4:74098939-74099562	promoter	0.767238	0.607248	3.19635	0.0013918	0.0112991	0.15999	155.173	-2.80551	0.555535	-5.05011	4.41553e-07	3.32898e-05
BRCA	ENSG00000109654	TRIM2	cg00381131	chr4:153152464	CGI:chr4:153153231-153153893	gene body,exon,promoter	0.153619	0.288903	-3.04414	0.00233348	0.0146666	-0.135285	2540.87	-1.31744	0.400496	-3.28953	0.00100357	0.0113636
BRCA	ENSG00000109654	TRIM2	cg14001992	chr4:153152661	CGI:chr4:153153231-153153893	gene body,promoter	0.316245	0.609345	-3.35148	0.00080381	0.00827609	-0.2931	2540.87	-1.31744	0.400496	-3.28953	0.00100357	0.0113636
BRCA	ENSG00000117983	MUC5B	cg03609102	chr11:1223303	CGI:chr11:1226600-1226910	gene body,promoter	0.41669	0.568859	-2.56264	0.010388	0.0270593	-0.152169	5792.69	-4.34524	0.736326	-5.90124	3.60786e-09	7.49595e-07
BRCA	ENSG00000110169	HPX	cg25426350	chr11:6441161	CGI:chr11:6456373-6456948	gene body,promoter	0.475227	0.318698	2.90657	0.00365419	0.017976	0.156529	1550.82	-1.59224	0.596179	-2.67074	0.00756845	0.0477349
BRCA	ENSG00000184937	WT1	cg16092786	chr11:32434189	CGI:chr11:32433328-32435765	gene body,promoter	0.396489	0.566734	-2.30652	0.0210816	0.0356952	-0.170244	333.905	-4.66123	0.751537	-6.20226	5.5659e-10	1.69511e-07
BRCA	ENSG00000184937	WT1	cg25563456	chr11:32434523	CGI:chr11:32433328-32435765	gene body,promoter	0.320151	0.542378	-3.18464	0.00144936	0.0115507	-0.222226	333.905	-4.66123	0.751537	-6.20226	5.5659e-10	1.69511e-07
BRCA	ENSG00000184937	WT1	cg15107670	chr11:32435213	CGI:chr11:32433328-32435765	gene body,CDS,exon,promoter	0.258353	0.465659	-2.85681	0.00427926	0.0190843	-0.207306	333.905	-4.66123	0.751537	-6.20226	5.5659e-10	1.69511e-07
BRCA	ENSG00000184937	WT1	cg13663793	chr11:32435578	CGI:chr11:32433328-32435765	gene body,UTR,exon,promoter	0.169921	0.356202	-2.89925	0.00374057	0.0181345	-0.186281	333.905	-4.66123	0.751537	-6.20226	5.5659e-10	1.69511e-07
BRCA	ENSG00000166016	ABTB2	cg01888411	chr11:34356746	CGI:chr11:34356682-34358176	gene body,CDS,exon,promoter	0.162263	0.305073	-2.23481	0.02543	0.0383422	-0.142811	675.333	-1.08347	0.390557	-2.77416	0.00553446	0.0385085
BRCA	ENSG00000135374	ELF5	cg11875459	chr11:34513238	CGI:chr11:34438618-34439310	gene body,promoter	0.788517	0.935896	-2.87583	0.00402963	0.0186684	-0.147379	2278.12	-4.21107	0.762143	-5.5253	3.28932e-08	4.35359e-06
BRCA	ENSG00000135374	ELF5	cg24253136	chr11:34513593	CGI:chr11:34438618-34439310	gene body,promoter	0.669876	0.826421	-2.39872	0.0164524	0.032415	-0.156544	2278.12	-4.21107	0.762143	-5.5253	3.28932e-08	4.35359e-06
BRCA	ENSG00000156689	GLYATL2	cg01869193	chr11:58905614	CGI:chr11:58905378-58905815	promoter	0.259877	0.111687	3.42319	0.000618903	0.00698544	0.14819	1514.37	-3.74152	0.731451	-5.11519	3.13419e-07	2.47795e-05
BRCA	ENSG00000134827	TCN1	cg20018806	chr11:59866401	CGI:chr11:59898106-59898384	gene body,CDS,exon,promoter	0.612093	0.372621	2.07236	0.0382323	0.0451366	0.239472	1067.17	-3.88345	0.845412	-4.59356	4.35757e-06	0.000193684
BRCA	ENSG00000133317	LGALS12	cg13439241	chr11:63506035	CGI:chr11:63490906-63491332	promoter	0.532863	0.694325	-3.01194	0.00259583	0.0154225	-0.161461	161.294	-1.94956	0.634552	-3.07235	0.00212381	0.0194654
BRCA	ENSG00000149809	TM7SF2	cg07471203	chr11:65113439	CGI:chr11:65111574-65112941	gene body,exon,promoter	0.733597	0.5706	2.13968	0.0323808	0.0422772	0.162996	2053.33	1.16234	0.369503	3.14568	0.00165703	0.0163039
BRCA	ENSG00000175592	FOSL1	cg13807509	chr11:65899645	CGI:chr11:65899205-65900738	gene body,promoter	0.327151	0.473266	-1.99772	0.0457475	0.0483484	-0.146115	249.344	-1.78178	0.494666	-3.60198	0.000315798	0.00496305
BRCA	ENSG00000084207	GSTP1	cg19114214	chr11:67582119	CGI:chr11:67583457-67584482	promoter	0.402127	0.247301	2.57581	0.0100006	0.0266618	0.154826	11467.3	-1.93975	0.417204	-4.64941	3.32882e-06	0.00015777
BRCA	ENSG00000084207	GSTP1	cg25866895	chr11:67582855	CGI:chr11:67583457-67584482	promoter	0.342655	0.234217	2.90218	0.0037058	0.0180693	0.108438	11467.3	-1.93975	0.417204	-4.64941	3.32882e-06	0.00015777
BRCA	ENSG00000084207	GSTP1	cg05244766	chr11:67583028	CGI:chr11:67583457-67584482	promoter	0.466533	0.302345	1.98601	0.0470325	0.0488357	0.164188	11467.3	-1.93975	0.417204	-4.64941	3.32882e-06	0.00015777
BRCA	ENSG00000084207	GSTP1	cg09038676	chr11:67584137	CGI:chr11:67583457-67584482	gene body,CDS,exon,promoter	0.230664	0.460172	-2.54508	0.0109254	0.0275899	-0.229508	11467.3	-1.93975	0.417204	-4.64941	3.32882e-06	0.00015777
BRCA	ENSG00000110195	FOLR1	cg03699566	chr11:72189608	CGI:chr11:72223203-72225277	gene body,UTR,exon,promoter	0.793563	0.898228	-3.05146	0.00227734	0.0144809	-0.104666	586.944	-3.25607	0.754794	-4.31385	1.60433e-05	0.000508266
BRCA	ENSG00000054938	CHRDL2	cg13616912	chr11:74731695	CGI:chr11:74731215-74731829	promoter	0.144425	0.343501	-2.48653	0.0128994	0.0293831	-0.199077	117.875	-2.50532	0.611308	-4.0983	4.16202e-05	0.0010401
BRCA	ENSG00000054938	CHRDL2	cg08952029	chr11:74731855	CGI:chr11:74731215-74731829	promoter	0.610573	0.738032	-2.29481	0.0217439	0.0361217	-0.127459	117.875	-2.50532	0.611308	-4.0983	4.16202e-05	0.0010401
BRCA	ENSG00000085741	WNT11	cg18001524	chr11:76211194	CGI:chr11:76211125-76211332	promoter	0.434924	0.574408	-2.46458	0.0137173	0.0301352	-0.139485	372.801	-2.9271	0.569571	-5.13914	2.76005e-07	2.2519e-05
BRCA	ENSG00000262406	MMP12	cg02368591	chr11:102875635	CGI:chr11:103091545-103092320	promoter	0.59235	0.745596	-2.77046	0.00559774	0.0213322	-0.153247	396.659	-1.82609	0.689161	-2.64973	0.00805556	0.0496922
BRCA	ENSG00000137752	CASP1	cg21002651	chr11:105035162	CGI:chr11:105610399-105610695	gene body,UTR,exon,promoter	0.155748	0.340313	-2.93145	0.00337387	0.0173768	-0.184565	1107.08	-1.30086	0.289922	-4.48691	7.2262e-06	0.0002844
BRCA	ENSG00000110324	IL10RA	cg05468843	chr11:117987275	CGI:chr11:117985923-117986583	gene body,exon,promoter	0.55204	0.695399	-2.11626	0.0343226	0.0432843	-0.14336	1569.26	-1.11604	0.320591	-3.48121	0.000499156	0.00678761
BRCA	ENSG00000089012	SIRPG	cg11061975	chr20:1658679	CGI:chr20:1735684-1736007	promoter	0.486964	0.340422	2.39872	0.0164524	0.032415	0.146541	157.928	-1.4798	0.494387	-2.9932	0.0027607	0.0234673
BRCA	ENSG00000088836	SLC4A11	cg22928082	chr20:3237876	CGI:chr20:3237932-3240284	gene body,promoter	0.555965	0.670732	-1.98162	0.0475221	0.0490113	-0.114767	589.045	-1.33397	0.464328	-2.87291	0.00406709	0.0307406
BRCA	ENSG00000101311	FERMT1	cg16408771	chr20:6123176	CGI:chr20:6122789-6123323	gene body,UTR,exon,promoter	0.210942	0.441777	-2.71045	0.00671911	0.0228889	-0.230834	359.594	-3.34072	0.6264	-5.3332	9.64948e-08	9.93691e-06
BRCA	ENSG00000101311	FERMT1	cg06668073	chr20:6123371	CGI:chr20:6122789-6123323	gene body,UTR,exon,promoter	0.196791	0.351754	-2.72216	0.00648563	0.0225817	-0.154963	359.594	-3.34072	0.6264	-5.3332	9.64948e-08	9.93691e-06
BRCA	ENSG00000078898	BPIFB2	cg10968815	chr20:33007540	CGI:chr20:32819725-32820318	promoter	0.424565	0.273788	2.89779	0.00375807	0.018155	0.150777	616.749	-3.69092	0.841443	-4.38642	1.15231e-05	0.000402137
BRCA	ENSG00000078898	BPIFB2	cg08918845	chr20:33007626	CGI:chr20:32819725-32820318	gene body,UTR,exon,promoter	0.435695	0.279127	3.06316	0.0021901	0.0142495	0.156568	616.749	-3.69092	0.841443	-4.38642	1.15231e-05	0.000402137
BRCA	ENSG00000124143	ARHGAP40	cg14040722	chr20:38600866	CGI:chr20:38601880-38602099	promoter	0.730397	0.842359	-2.45726	0.014	0.0304081	-0.111962	793.787	-2.94856	0.785039	-3.75594	0.00017269	0.00313227
BRCA	ENSG00000124143	ARHGAP40	cg01025836	chr20:38601683	CGI:chr20:38601880-38602099	promoter	0.363126	0.669122	-2.91242	0.00358639	0.0178509	-0.305997	793.787	-2.94856	0.785039	-3.75594	0.00017269	0.00313227
BRCA	ENSG00000124143	ARHGAP40	cg03356734	chr20:38601770	CGI:chr20:38601880-38602099	promoter	0.308929	0.540273	-2.86705	0.00414315	0.0188258	-0.231344	793.787	-2.94856	0.785039	-3.75594	0.00017269	0.00313227
BRCA	ENSG00000124143	ARHGAP40	cg06301550	chr20:38601841	CGI:chr20:38601880-38602099	promoter	0.378573	0.67535	-2.9212	0.00348683	0.0176465	-0.296777	793.787	-2.94856	0.785039	-3.75594	0.00017269	0.00313227
BRCA	ENSG00000124143	ARHGAP40	cg08438366	chr20:38601969	CGI:chr20:38601880-38602099	gene body,UTR,exon,promoter	0.436016	0.63032	-2.80119	0.00509141	0.020525	-0.194304	793.787	-2.94856	0.785039	-3.75594	0.00017269	0.00313227
BRCA	ENSG00000124143	ARHGAP40	cg26118446	chr20:38603314	CGI:chr20:38601880-38602099	gene body,promoter	0.821694	0.929451	-2.85388	0.00431889	0.0191742	-0.107757	793.787	-2.94856	0.785039	-3.75594	0.00017269	0.00313227
BRCA	ENSG00000101445	PPP1R16B	cg27377213	chr20:38805160	CGI:chr20:38805563-38806949	promoter	0.785703	0.887808	-2.84071	0.00450135	0.0195033	-0.102105	696.466	-1.24823	0.381996	-3.26766	0.00108439	0.0120272
BRCA	ENSG00000101445	PPP1R16B	cg15821319	chr20:38805515	CGI:chr20:38805563-38806949	promoter	0.580026	0.692206	-2.19529	0.0281426	0.0399035	-0.11218	696.466	-1.24823	0.381996	-3.26766	0.00108439	0.0120272
BRCA	ENSG00000101445	PPP1R16B	cg24834740	chr20:38805909	CGI:chr20:38805563-38806949	gene body,promoter	0.205082	0.362144	-2.42068	0.0154917	0.0316642	-0.157063	696.466	-1.24823	0.381996	-3.26766	0.00108439	0.0120272
BRCA	ENSG00000101445	PPP1R16B	cg06733470	chr20:38806561	CGI:chr20:38805563-38806949	gene body,promoter	0.128426	0.245404	-2.3153	0.0205964	0.0353655	-0.116978	696.466	-1.24823	0.381996	-3.26766	0.00108439	0.0120272
BRCA	ENSG00000100979	PLTP	cg11191337	chr20:45913165	CGI:chr20:45911806-45912318	promoter	0.674913	0.492912	2.20993	0.0271102	0.0393024	0.182	4266.69	-1.00467	0.326513	-3.07697	0.0020912	0.0192407
BRCA	ENSG00000101134	DOK5	cg11822659	chr20:54476242	CGI:chr20:54475194-54476454	gene body,promoter	0.280173	0.436469	-2.28164	0.0225106	0.0365903	-0.156296	212.759	-1.39863	0.393713	-3.55242	0.000381709	0.00563202
BRCA	ENSG00000101134	DOK5	cg14606116	chr20:54476279	CGI:chr20:54475194-54476454	gene body,promoter	0.220947	0.32549	-2.36945	0.0178145	0.0334635	-0.104543	212.759	-1.39863	0.393713	-3.55242	0.000381709	0.00563202
BRCA	ENSG00000101134	DOK5	cg09177519	chr20:54476445	CGI:chr20:54475194-54476454	gene body,promoter	0.267905	0.405943	-2.55532	0.010609	0.0272753	-0.138038	212.759	-1.39863	0.393713	-3.55242	0.000381709	0.00563202
BRCA	ENSG00000101134	DOK5	cg05101674	chr20:54476613	CGI:chr20:54475194-54476454	gene body,promoter	0.339647	0.53568	-2.12504	0.033583	0.0428904	-0.196033	212.759	-1.39863	0.393713	-3.55242	0.000381709	0.00563202
BRCA	ENSG00000101194	SLC17A9	cg22883889	chr20:62952334	CGI:chr20:62952539-62952870	promoter	0.437501	0.267671	2.86559	0.00416235	0.0188529	0.16983	669.843	1.31198	0.438604	2.99127	0.00277819	0.0235935
BRCA	ENSG00000101194	SLC17A9	cg00727912	chr20:62952384	CGI:chr20:62952539-62952870	promoter	0.39335	0.236854	3.15683	0.00159494	0.0121362	0.156496	669.843	1.31198	0.438604	2.99127	0.00277819	0.0235935
BRCA	ENSG00000101194	SLC17A9	cg14686919	chr20:62952807	CGI:chr20:62952539-62952870	gene body,UTR,exon,promoter	0.351246	0.226609	2.10016	0.0357145	0.0439612	0.124636	669.843	1.31198	0.438604	2.99127	0.00277819	0.0235935
BRCA	ENSG00000125534	PPDPF	cg01531431	chr20:63519510	CGI:chr20:63519692-63521494	promoter	0.739414	0.57276	2.6724	0.00753103	0.0239927	0.166655	18218.2	1.14655	0.264587	4.33334	1.46861e-05	0.000476246
BRCA	ENSG00000125534	PPDPF	cg07882648	chr20:63521714	CGI:chr20:63521713-63521917	gene body,CDS,exon,promoter	0.385553	0.239528	3.35441	0.000795354	0.00822316	0.146025	18218.2	1.14655	0.264587	4.33334	1.46861e-05	0.000476246
BRCA	ENSG00000178372	CALML5	cg14096855	chr10:5499860	CGI:chr10:5498822-5499552	promoter	0.627807	0.747135	-2.57727	0.00995832	0.0266212	-0.119327	5004.56	-5.40653	0.845999	-6.3907	1.6513e-10	6.41422e-08
BRCA	ENSG00000198879	SFMBT2	cg25291138	chr10:7409860	CGI:chr10:7407414-7413250	gene body,promoter	0.0978992	0.222907	-2.31969	0.0203575	0.0352053	-0.125008	1356.02	-1.09423	0.295566	-3.70215	0.000213781	0.00370499
BRCA	ENSG00000198879	SFMBT2	cg20506184	chr10:7411367	CGI:chr10:7407414-7413250	gene body,UTR,exon,promoter	0.100377	0.244876	-2.18651	0.0287782	0.0402794	-0.144498	1356.02	-1.09423	0.295566	-3.70215	0.000213781	0.00370499
BRCA	ENSG00000148468	FAM171A1	cg13999877	chr10:15371441	CGI:chr10:15370420-15371463	promoter	0.133838	0.248566	-1.9904	0.0465471	0.0486416	-0.114728	1528.4	-1.49	0.413834	-3.60047	0.000317641	0.0049786
BRCA	ENSG00000165996	PTPLA	cg00939082	chr10:17617780	CGI:chr10:17616666-17617640	promoter	0.166899	0.295095	-2.06797	0.0386433	0.0453278	-0.128196	190.857	-1.70649	0.445155	-3.83347	0.00012635	0.00247274
BRCA	ENSG00000107968	MAP3K8	cg11230435	chr10:30435445	CGI:chr10:30433449-30434778	gene body,promoter	0.352475	0.538156	-2.21285	0.0269077	0.0391929	-0.185681	798.491	-1.24426	0.307342	-4.04844	5.15605e-05	0.00123049
BRCA	ENSG00000177283	FZD8	cg19841276	chr10:35642964	CGI:chr10:35639382-35642965	promoter	0.112922	0.2392	-2.23334	0.0255263	0.0383975	-0.126278	1305.67	-1.52079	0.391356	-3.88596	0.000101927	0.00210304
BRCA	ENSG00000204175	GPRIN2	cg25995980	chr10:46556101	CGI:chr10:46556321-46557169	promoter	0.509826	0.662177	-2.60362	0.00922459	0.0258862	-0.152352	179.981	-2.53257	0.61715	-4.10365	4.06688e-05	0.00102348
BRCA	ENSG00000128815	WDFY4	cg22835851	chr10:48684257	CGI:chr10:48655575-48656556	promoter	0.522476	0.41508	2.26554	0.0234795	0.0371579	0.107397	839.712	-1.23164	0.353784	-3.48133	0.000498927	0.00678761
BRCA	ENSG00000263639	MSMB	cg23975355	chr10:46047738	CGI:chr10:46030173-46030750	promoter	0.83933	0.578559	3.93835	8.20424e-05	0.00141986	0.260772	1379.3	2.5851	0.874862	2.95486	0.00312809	0.0255335
BRCA	ENSG00000263639	MSMB	cg27607126	chr10:46046926	CGI:chr10:46030173-46030750	promoter	0.722424	0.526094	2.97682	0.00291258	0.0162561	0.196329	1379.3	2.5851	0.874862	2.95486	0.00312809	0.0255335
BRCA	ENSG00000263639	MSMB	cg17030820	chr10:46046561	CGI:chr10:46030173-46030750	promoter	0.871184	0.696151	3.27977	0.00103893	0.00962426	0.175033	1379.3	2.5851	0.874862	2.95486	0.00312809	0.0255335
BRCA	ENSG00000107984	DKK1	cg18956393	chr10:52314764	CGI:chr10:52314229-52315067	gene body,exon,promoter	0.225249	0.418011	-2.32262	0.0201996	0.0350953	-0.192762	407.383	-4.30814	0.742461	-5.80251	6.53286e-09	1.19111e-06
BRCA	ENSG00000107738	C10orf54	cg09810750	chr10:71773692	CGI:chr10:71773334-71773735	promoter	0.0684794	0.200627	-2.61386	0.00895254	0.0256077	-0.132148	1784.43	-1.00198	0.274574	-3.6492	0.000263061	0.00433068
BRCA	ENSG00000122863	CHST3	cg19731268	chr10:71964939	CGI:chr10:71963953-71965012	gene body,promoter	0.308	0.535662	-2.25969	0.0238407	0.037385	-0.227661	1642.69	-1.1922	0.35088	-3.39775	0.000679433	0.0085343
BRCA	ENSG00000107742	SPOCK2	cg17958658	chr10:72088205	CGI:chr10:72087048-72088475	gene body,CDS,exon,promoter	0.26755	0.474233	-2.65777	0.00786602	0.0243826	-0.206683	1998.42	-1.52552	0.409506	-3.72526	0.00019511	0.00344215
BRCA	ENSG00000107742	SPOCK2	cg10856045	chr10:72088705	CGI:chr10:72087048-72088475	gene body,UTR,exon,promoter	0.466501	0.591593	-1.98747	0.0468702	0.048767	-0.125092	1998.42	-1.52552	0.409506	-3.72526	0.00019511	0.00344215
BRCA	ENSG00000107742	SPOCK2	cg08641278	chr10:72089006	CGI:chr10:72087048-72088475	gene body,UTR,exon,promoter	0.556122	0.738026	-2.76607	0.00567367	0.0214653	-0.181904	1998.42	-1.52552	0.409506	-3.72526	0.00019511	0.00344215
BRCA	ENSG00000107742	SPOCK2	cg12623536	chr10:72089059	CGI:chr10:72087048-72088475	promoter	0.605118	0.711663	-2.06211	0.0391972	0.0455894	-0.106545	1998.42	-1.52552	0.409506	-3.72526	0.00019511	0.00344215
BRCA	ENSG00000165655	ZNF503	cg08158570	chr10:75401177	CGI:chr10:75395370-75409842	gene body,CDS,exon,promoter	0.0803167	0.189077	-2.23334	0.0255263	0.0383975	-0.108761	787.573	-1.56963	0.412435	-3.80577	0.000141365	0.00268715
BRCA	ENSG00000138207	RBP4	cg18585903	chr10:93601585	CGI:chr10:93600632-93601630	gene body,UTR,exon,promoter	0.103753	0.27457	-2.25091	0.0243915	0.0377206	-0.170816	502.599	-1.7123	0.626451	-2.73333	0.00626969	0.0418424
BRCA	ENSG00000155629	PIK3AP1	cg27664530	chr10:96719946	CGI:chr10:96720275-96720730	gene body,promoter	0.525874	0.662386	-2.20407	0.0275192	0.0395402	-0.136511	1342.4	-1.07967	0.299963	-3.59934	0.000319029	0.00498724
BRCA	ENSG00000155629	PIK3AP1	cg14093363	chr10:96720234	CGI:chr10:96720275-96720730	gene body,promoter	0.478865	0.633264	-2.61825	0.00883815	0.0254753	-0.154399	1342.4	-1.07967	0.299963	-3.59934	0.000319029	0.00498724
BRCA	ENSG00000099194	SCD	cg24503796	chr10:100347919	CGI:chr10:100346425-100347965	gene body,promoter	0.250156	0.0845492	3.94714	7.90918e-05	0.00137698	0.165607	44253.7	1.19926	0.416432	2.87986	0.00397856	0.0302249
BRCA	ENSG00000151640	DPYSL4	cg07295678	chr10:132186505	CGI:chr10:132185408-132187996	promoter	0.272845	0.48005	-2.60654	0.00914612	0.0257848	-0.207205	236.614	-2.19247	0.497206	-4.40958	1.03573e-05	0.000373868
BRCA	ENSG00000151640	DPYSL4	cg05652533	chr10:132186783	CGI:chr10:132185408-132187996	promoter	0.34882	0.554948	-2.57288	0.0100855	0.0267478	-0.206128	236.614	-2.19247	0.497206	-4.40958	1.03573e-05	0.000373868
BRCA	ENSG00000151640	DPYSL4	cg19205023	chr10:132187951	CGI:chr10:132185408-132187996	gene body,promoter	0.366774	0.503825	-2.38701	0.0169858	0.032821	-0.137052	236.614	-2.19247	0.497206	-4.40958	1.03573e-05	0.000373868
BRCA	ENSG00000134762	DSC3	cg20029745	chr18:31042019	CGI:chr18:31041523-31043151	gene body,promoter	0.563917	0.763488	-2.57727	0.00995832	0.0266212	-0.199572	1722.21	-3.66035	0.694201	-5.27276	1.34386e-07	1.27595e-05
BRCA	ENSG00000134762	DSC3	cg10794285	chr18:31042058	CGI:chr18:31041523-31043151	gene body,promoter	0.256151	0.481683	-2.11041	0.0348233	0.0435216	-0.225532	1722.21	-3.66035	0.694201	-5.27276	1.34386e-07	1.27595e-05
BRCA	ENSG00000134762	DSC3	cg19967492	chr18:31042234	CGI:chr18:31041523-31043151	gene body,promoter	0.257628	0.382504	-2.0343	0.0419209	0.0467513	-0.124876	1722.21	-3.66035	0.694201	-5.27276	1.34386e-07	1.27595e-05
BRCA	ENSG00000134760	DSG1	cg19415383	chr18:31318009	CGI:chr18:31497589-31498563	promoter	0.728089	0.849042	-2.31091	0.0208378	0.0355348	-0.120954	188.63	-5.12054	0.89002	-5.75329	8.75231e-09	1.5332e-06
BRCA	ENSG00000160191	PDE9A	cg08729135	chr21:42653445	CGI:chr21:42653091-42653446	promoter	0.210817	0.431731	-2.41921	0.0155542	0.0316942	-0.220914	570.392	-1.30094	0.412279	-3.15548	0.00160232	0.0158881
BRCA	ENSG00000160191	PDE9A	cg06722792	chr21:42653809	CGI:chr21:42653759-42654540	gene body,UTR,exon,promoter	0.0760306	0.231672	-2.64899	0.00807337	0.0246129	-0.155641	570.392	-1.30094	0.412279	-3.15548	0.00160232	0.0158881
BRCA	ENSG00000160191	PDE9A	cg15169265	chr21:42654539	CGI:chr21:42653759-42654540	gene body,promoter	0.125278	0.34968	-2.28749	0.022167	0.0363904	-0.224402	570.392	-1.30094	0.412279	-3.15548	0.00160232	0.0158881
BRCA	ENSG00000183018	SPNS2	cg10457446	chr17:4497748	CGI:chr17:4498664-4500028	promoter	0.597652	0.369618	3.20659	0.00134318	0.0111118	0.228035	918.032	-1.21246	0.354412	-3.42105	0.000623788	0.00803014
BRCA	ENSG00000132530	XAF1	cg20803910	chr17:6756056	CGI:chr17:6775886-6776391	gene body,UTR,exon,promoter	0.15669	0.336575	-2.0987	0.0358434	0.0440171	-0.179885	819.633	-1.30498	0.372065	-3.5074	0.000452503	0.00634142
BRCA	ENSG00000132530	XAF1	cg17753212	chr17:6756243	CGI:chr17:6775886-6776391	gene body,exon,promoter	0.24071	0.37939	-2.32408	0.0201211	0.0350352	-0.13868	819.633	-1.30498	0.372065	-3.5074	0.000452503	0.00634142
BRCA	ENSG00000072818	ACAP1	cg13295242	chr17:7336399	CGI:chr17:7329011-7329832	promoter	0.212151	0.40795	-2.66508	0.00769689	0.0241829	-0.195798	694.69	-1.03617	0.370157	-2.79926	0.00512192	0.0365782
BRCA	ENSG00000125430	HS3ST3B1	cg17603502	chr17:14300739	CGI:chr17:14300851-14304385	promoter	0.169051	0.312761	-2.2992	0.0214934	0.0359562	-0.14371	317.7	-1.31376	0.32281	-4.06975	4.70635e-05	0.00114257
BRCA	ENSG00000125430	HS3ST3B1	cg19814946	chr17:14301931	CGI:chr17:14300851-14304385	gene body,CDS,exon,promoter	0.121789	0.307042	-3.40563	0.000660116	0.00726214	-0.185252	317.7	-1.31376	0.32281	-4.06975	4.70635e-05	0.00114257
BRCA	ENSG00000125430	HS3ST3B1	cg04164190	chr17:14302139	CGI:chr17:14300851-14304385	gene body,promoter	0.118482	0.337727	-3.22269	0.00126993	0.0108089	-0.219245	317.7	-1.31376	0.32281	-4.06975	4.70635e-05	0.00114257
BRCA	ENSG00000170425	ADORA2B	cg17580614	chr17:15946198	CGI:chr17:15944443-15946199	gene body,promoter	0.75184	0.856255	-2.4397	0.0146994	0.0310208	-0.104415	191.345	-1.18213	0.382679	-3.08908	0.00200775	0.0186361
BRCA	ENSG00000170425	ADORA2B	cg07563400	chr17:15946242	CGI:chr17:15944443-15946199	gene body,promoter	0.472014	0.612402	-2.25676	0.024023	0.0374955	-0.140388	191.345	-1.18213	0.382679	-3.08908	0.00200775	0.0186361
BRCA	ENSG00000109072	VTN	cg05854644	chr17:28372166	CGI:chr17:28371338-28372538	gene body,promoter	0.179817	0.354792	-2.6724	0.00753103	0.0239927	-0.174975	68.4457	-1.56827	0.558016	-2.81044	0.00494733	0.035616
BRCA	ENSG00000108691	CCL2	cg04633676	chr17:34254201	CGI:chr17:34039924-34040387	promoter	0.568914	0.774183	-2.88169	0.00395552	0.0185327	-0.20527	1535.93	-1.15487	0.368688	-3.13238	0.00173396	0.0168752
BRCA	ENSG00000108691	CCL2	cg12698626	chr17:34254447	CGI:chr17:34039924-34040387	promoter	0.384352	0.49075	-1.98162	0.0475221	0.0490113	-0.106398	1535.93	-1.15487	0.368688	-3.13238	0.00173396	0.0168752
BRCA	ENSG00000181374	CCL13	cg21042139	chr17:34356459	CGI:chr17:34578946-34581852	gene body,UTR,exon,promoter	0.648673	0.532729	2.24798	0.0245775	0.0378249	0.115943	94.2111	-2.46285	0.59531	-4.13709	3.51731e-05	0.00091882
BRCA	ENSG00000166750	SLFN5	cg07079059	chr17:35242309	CGI:chr17:35242122-35243508	promoter	0.0952995	0.229502	-2.23481	0.02543	0.0383422	-0.134203	4487.88	-1.303	0.304771	-4.27535	1.90839e-05	0.000584889
BRCA	ENSG00000166750	SLFN5	cg23010414	chr17:35242953	CGI:chr17:35242122-35243508	promoter	0.072037	0.176144	-2.79388	0.00520806	0.0207172	-0.104107	4487.88	-1.303	0.304771	-4.27535	1.90839e-05	0.000584889
BRCA	ENSG00000172716	SLFN11	cg18108623	chr17:35374302	CGI:chr17:35373970-35374638	promoter	0.362941	0.71923	-3.72029	0.000198995	0.00300856	-0.356289	1640.75	-1.04882	0.273927	-3.82884	0.000128749	0.00250598
BRCA	ENSG00000172716	SLFN11	cg13341380	chr17:35374510	CGI:chr17:35373970-35374638	promoter	0.161312	0.33566	-2.46604	0.0136614	0.0300834	-0.174348	1640.75	-1.04882	0.273927	-3.82884	0.000128749	0.00250598
BRCA	ENSG00000275385	CCL18	cg08214029	chr17:36064118	CGI:chr17:36166412-36166696	promoter	0.374986	0.223171	3.49783	0.000469056	0.00579729	0.151815	505.576	-2.32217	0.638328	-3.6379	0.00027487	0.00449348
BRCA	ENSG00000275385	CCL18	cg12311002	chr17:36064375	CGI:chr17:36166412-36166696	gene body,CDS,exon,promoter	0.699272	0.510192	2.21578	0.0267065	0.0390749	0.18908	505.576	-2.32217	0.638328	-3.6379	0.00027487	0.00449348
BRCA	ENSG00000141750	STAC2	cg02795515	chr17:39225020	CGI:chr17:39224700-39226110	gene body,promoter	0.24972	0.447671	-2.89779	0.00375807	0.018155	-0.197951	2417.71	-4.39563	0.785756	-5.59414	2.21714e-08	3.27404e-06
BRCA	ENSG00000141750	STAC2	cg19179801	chr17:39225583	CGI:chr17:39224700-39226110	gene body,UTR,exon,promoter	0.387606	0.545011	-2.48507	0.0129526	0.0294401	-0.157406	2417.71	-4.39563	0.785756	-5.59414	2.21714e-08	3.27404e-06
BRCA	ENSG00000141750	STAC2	cg25411207	chr17:39226048	CGI:chr17:39224700-39226110	promoter	0.177478	0.304704	-2.41482	0.0157429	0.0318617	-0.127227	2417.71	-4.39563	0.785756	-5.59414	2.21714e-08	3.27404e-06
BRCA	ENSG00000131759	RARA	cg03085312	chr17:40309029	CGI:chr17:40316706-40316949	promoter	0.249141	0.147139	2.55678	0.0105645	0.0272277	0.102002	7477.26	1.27206	0.305748	4.16049	3.17568e-05	0.000855854
BRCA	ENSG00000005102	MEOX1	cg12686920	chr17:43662438	CGI:chr17:43645851-43646458	promoter	0.821606	0.627737	2.29189	0.0219123	0.0362378	0.193868	313.553	-1.38068	0.501897	-2.75093	0.00594259	0.0404042
BRCA	ENSG00000131096	PYY	cg19579216	chr17:44004488	CGI:chr17:44004659-44007604	promoter	0.498341	0.634716	-2.32408	0.0201211	0.0350352	-0.136375	70.9983	2.2943	0.668204	3.43353	0.00059577	0.00772513
BRCA	ENSG00000161653	NAGS	cg19579216	chr17:44004488	CGI:chr17:44004659-44007604	promoter	0.498341	0.634716	-2.32408	0.0201211	0.0350352	-0.136375	331.867	1.6753	0.393701	4.25527	2.08797e-05	0.000628079
BRCA	ENSG00000161653	NAGS	cg03902729	chr17:44004564	CGI:chr17:44004659-44007604	gene body,UTR,exon,promoter	0.397371	0.583997	-2.57142	0.0101283	0.0267869	-0.186626	331.867	1.6753	0.393701	4.25527	2.08797e-05	0.000628079
BRCA	ENSG00000131096	PYY	cg03902729	chr17:44004564	CGI:chr17:44004659-44007604	promoter	0.397371	0.583997	-2.57142	0.0101283	0.0267869	-0.186626	70.9983	2.2943	0.668204	3.43353	0.00059577	0.00772513
BRCA	ENSG00000161653	NAGS	cg03384000	chr17:44004580	CGI:chr17:44004659-44007604	gene body,UTR,exon,promoter	0.450227	0.587624	-2.26993	0.0232117	0.0370114	-0.137397	331.867	1.6753	0.393701	4.25527	2.08797e-05	0.000628079
BRCA	ENSG00000131096	PYY	cg03384000	chr17:44004580	CGI:chr17:44004659-44007604	promoter	0.450227	0.587624	-2.26993	0.0232117	0.0370114	-0.137397	70.9983	2.2943	0.668204	3.43353	0.00059577	0.00772513
BRCA	ENSG00000161653	NAGS	cg00462994	chr17:44004587	CGI:chr17:44004659-44007604	gene body,UTR,exon,promoter	0.345806	0.534925	-2.45873	0.013943	0.0303365	-0.189119	331.867	1.6753	0.393701	4.25527	2.08797e-05	0.000628079
BRCA	ENSG00000131096	PYY	cg00462994	chr17:44004587	CGI:chr17:44004659-44007604	promoter	0.345806	0.534925	-2.45873	0.013943	0.0303365	-0.189119	70.9983	2.2943	0.668204	3.43353	0.00059577	0.00772513
BRCA	ENSG00000161653	NAGS	cg21515349	chr17:44004660	CGI:chr17:44004659-44007604	gene body,UTR,exon,promoter	0.483571	0.642573	-2.29628	0.0216601	0.0360684	-0.159003	331.867	1.6753	0.393701	4.25527	2.08797e-05	0.000628079
BRCA	ENSG00000131096	PYY	cg21515349	chr17:44004660	CGI:chr17:44004659-44007604	promoter	0.483571	0.642573	-2.29628	0.0216601	0.0360684	-0.159003	70.9983	2.2943	0.668204	3.43353	0.00059577	0.00772513
BRCA	ENSG00000131096	PYY	cg04032226	chr17:44005024	CGI:chr17:44004659-44007604	promoter	0.487799	0.650815	-2.27725	0.0227713	0.0367466	-0.163016	70.9983	2.2943	0.668204	3.43353	0.00059577	0.00772513
BRCA	ENSG00000161653	NAGS	cg04032226	chr17:44005024	CGI:chr17:44004659-44007604	gene body,CDS,exon,promoter	0.487799	0.650815	-2.27725	0.0227713	0.0367466	-0.163016	331.867	1.6753	0.393701	4.25527	2.08797e-05	0.000628079
BRCA	ENSG00000131096	PYY	cg24105314	chr17:44005556	CGI:chr17:44004659-44007604	promoter	0.468012	0.624079	-2.21725	0.0266063	0.0390324	-0.156067	70.9983	2.2943	0.668204	3.43353	0.00059577	0.00772513
BRCA	ENSG00000161653	NAGS	cg24105314	chr17:44005556	CGI:chr17:44004659-44007604	gene body,promoter	0.468012	0.624079	-2.21725	0.0266063	0.0390324	-0.156067	331.867	1.6753	0.393701	4.25527	2.08797e-05	0.000628079
BRCA	ENSG00000131096	PYY	cg09467501	chr17:44005825	CGI:chr17:44004659-44007604	promoter	0.402891	0.644425	-2.7646	0.00569918	0.0215011	-0.241535	70.9983	2.2943	0.668204	3.43353	0.00059577	0.00772513
BRCA	ENSG00000161653	NAGS	cg09467501	chr17:44005825	CGI:chr17:44004659-44007604	gene body,CDS,exon,promoter	0.402891	0.644425	-2.7646	0.00569918	0.0215011	-0.241535	331.867	1.6753	0.393701	4.25527	2.08797e-05	0.000628079
BRCA	ENSG00000131096	PYY	cg26796190	chr17:44005827	CGI:chr17:44004659-44007604	promoter	0.411246	0.622819	-2.61972	0.00880032	0.0254407	-0.211573	70.9983	2.2943	0.668204	3.43353	0.00059577	0.00772513
BRCA	ENSG00000161653	NAGS	cg26796190	chr17:44005827	CGI:chr17:44004659-44007604	gene body,CDS,exon,promoter	0.411246	0.622819	-2.61972	0.00880032	0.0254407	-0.211573	331.867	1.6753	0.393701	4.25527	2.08797e-05	0.000628079
BRCA	ENSG00000161653	NAGS	cg09300856	chr17:44006318	CGI:chr17:44004659-44007604	gene body,promoter	0.33962	0.630246	-2.61093	0.00902953	0.0256832	-0.290625	331.867	1.6753	0.393701	4.25527	2.08797e-05	0.000628079
BRCA	ENSG00000189120	SP6	cg23355492	chr17:47856227	CGI:chr17:47850845-47851344	promoter	0.765406	0.58874	3.08658	0.00202473	0.0137033	0.176665	819.952	-1.62931	0.3689	-4.41667	1.00231e-05	0.000366243
BRCA	ENSG00000189120	SP6	cg20556951	chr17:47856746	CGI:chr17:47850845-47851344	promoter	0.364137	0.229972	2.80412	0.00504541	0.0204466	0.134165	819.952	-1.62931	0.3689	-4.41667	1.00231e-05	0.000366243
BRCA	ENSG00000159184	HOXB13	cg18498593	chr17:48728772	CGI:chr17:48728191-48728786	gene body,UTR,exon,promoter	0.355118	0.580021	-2.38555	0.0170536	0.032876	-0.224903	342.589	-5.29737	1.0324	-5.13113	2.88011e-07	2.32859e-05
BRCA	ENSG00000064300	NGFR	cg08612467	chr17:49496228	CGI:chr17:49494983-49497954	gene body,promoter	0.305189	0.479085	-2.73094	0.00631533	0.0223289	-0.173896	884.901	-1.72251	0.489324	-3.52019	0.000431241	0.00613978
BRCA	ENSG00000068097	HEATR6	cg09967834	chr17:60079852	CGI:chr17:60078649-60079066	promoter	0.772562	0.64012	1.99333	0.0462258	0.0485232	0.132442	1879.71	1.12297	0.2596	4.32576	1.52008e-05	0.000489384
BRCA	ENSG00000075461	CACNG4	cg26743024	chr17:66964166	CGI:chr17:66964515-66966205	promoter	0.379153	0.277372	2.01235	0.0441829	0.0477051	0.101781	5791.56	1.75647	0.519299	3.3824	0.000718566	0.00885236
BRCA	ENSG00000069188	SDK2	cg00290483	chr17:73642890	CGI:chr17:73642889-73645531	gene body,promoter	0.418179	0.294035	2.79388	0.00520806	0.0207172	0.124144	705.149	2.4657	0.535159	4.60741	4.07708e-06	0.000184429
BRCA	ENSG00000069188	SDK2	cg13428152	chr17:73644199	CGI:chr17:73642889-73645531	promoter	0.1373	0.318006	-2.4397	0.0146994	0.0310208	-0.180706	705.149	2.4657	0.535159	4.60741	4.07708e-06	0.000184429
BRCA	ENSG00000069188	SDK2	cg17751892	chr17:73644482	CGI:chr17:73642889-73645531	promoter	0.0925726	0.192779	-1.98454	0.0471952	0.0488962	-0.100206	705.149	2.4657	0.535159	4.60741	4.07708e-06	0.000184429
BRCA	ENSG00000183048	SLC25A10	cg13150534	chr17:81713905	CGI:chr17:81711906-81712731	gene body,promoter	0.435119	0.289014	3.89884	9.6655e-05	0.00163474	0.146105	1477.3	1.1877	0.279982	4.24208	2.21455e-05	0.000661698
BRCA	ENSG00000183048	SLC25A10	cg13117272	chr17:81714022	CGI:chr17:81711906-81712731	gene body,promoter	0.444603	0.298153	3.8681	0.000109684	0.00181702	0.14645	1477.3	1.1877	0.279982	4.24208	2.21455e-05	0.000661698
BRCA	ENSG00000141579	ZNF750	cg06022562	chr17:82840005	CGI:chr17:82832492-82832705	gene body,UTR,exon,promoter	0.491702	0.250809	2.92267	0.00347049	0.017609	0.240894	522.962	-1.3408	0.383955	-3.49208	0.000479266	0.00657992
BRCA	ENSG00000141579	ZNF750	cg10828599	chr17:82840107	CGI:chr17:82832492-82832705	gene body,UTR,exon,promoter	0.437888	0.273549	3.42027	0.000625601	0.00703496	0.164339	522.962	-1.3408	0.383955	-3.49208	0.000479266	0.00657992
BRCA	ENSG00000141579	ZNF750	cg13616930	chr17:82840115	CGI:chr17:82832492-82832705	gene body,UTR,exon,promoter	0.428327	0.296911	3.20805	0.00133637	0.0110869	0.131417	522.962	-1.3408	0.383955	-3.49208	0.000479266	0.00657992
BRCA	ENSG00000141579	ZNF750	cg02384546	chr17:82840137	CGI:chr17:82832492-82832705	gene body,UTR,exon,promoter	0.365809	0.224283	3.61491	0.000300447	0.00416275	0.141526	522.962	-1.3408	0.383955	-3.49208	0.000479266	0.00657992
BRCA	ENSG00000141579	ZNF750	cg27285599	chr17:82840147	CGI:chr17:82832492-82832705	gene body,UTR,exon,promoter	0.409285	0.266167	3.38221	0.000719042	0.00768815	0.143118	522.962	-1.3408	0.383955	-3.49208	0.000479266	0.00657992
BRCA	ENSG00000105963	ADAP1	cg20705627	chr7:953580	CGI:chr7:953765-954938	gene body,promoter	0.393509	0.281854	2.31091	0.0208378	0.0355348	0.111655	325.451	1.08715	0.353572	3.07477	0.00210665	0.0193663
BRCA	ENSG00000122584	NXPH1	cg06444755	chr7:8434360	CGI:chr7:8433509-8435569	gene body,UTR,exon,promoter	0.208415	0.329952	-2.03869	0.0414805	0.046593	-0.121537	318.629	-6.15184	1.11821	-5.50153	3.76507e-08	4.77209e-06
BRCA	ENSG00000122584	NXPH1	cg03099208	chr7:8434914	CGI:chr7:8433509-8435569	gene body,promoter	0.482554	0.628481	-2.22164	0.0263079	0.0388645	-0.145928	318.629	-6.15184	1.11821	-5.50153	3.76507e-08	4.77209e-06
BRCA	ENSG00000122584	NXPH1	cg19469357	chr7:8435200	CGI:chr7:8433509-8435569	gene body,UTR,exon,promoter	0.269023	0.371234	-2.03723	0.0416269	0.0466533	-0.102212	318.629	-6.15184	1.11821	-5.50153	3.76507e-08	4.77209e-06
BRCA	ENSG00000106511	MEOX2	cg17544952	chr7:15685571	CGI:chr7:16399497-16399700	gene body,promoter	0.30625	0.504323	-2.69289	0.00708352	0.0233777	-0.198072	254.208	-1.33063	0.428102	-3.1082	0.0018823	0.0178804
BRCA	ENSG00000136244	IL6	cg10140158	chr7:22726131	CGI:chr7:22665204-22665802	gene body,UTR,exon,promoter	0.681323	0.795443	-1.99186	0.0463862	0.0485895	-0.11412	161.499	-2.28412	0.561602	-4.06716	4.75893e-05	0.00115377
BRCA	ENSG00000070882	OSBPL3	cg07659872	chr7:24980128	CGI:chr7:24979380-24980636	gene body,UTR,exon,promoter	0.135267	0.285848	-2.38994	0.0168511	0.0327249	-0.15058	1229.96	-1.04464	0.299005	-3.49373	0.000476316	0.00655754
BRCA	ENSG00000070882	OSBPL3	cg19843429	chr7:24980132	CGI:chr7:24979380-24980636	gene body,UTR,exon,promoter	0.104066	0.263355	-2.3314	0.0197323	0.0347686	-0.159289	1229.96	-1.04464	0.299005	-3.49373	0.000476316	0.00655754
BRCA	ENSG00000070882	OSBPL3	cg08296824	chr7:24980282	CGI:chr7:24979380-24980636	gene body,promoter	0.0985403	0.235921	-2.05626	0.0397577	0.0458758	-0.137381	1229.96	-1.04464	0.299005	-3.49373	0.000476316	0.00655754
BRCA	ENSG00000070882	OSBPL3	cg08797837	chr7:24980324	CGI:chr7:24979380-24980636	gene body,promoter	0.0951441	0.282818	-2.57142	0.0101283	0.0267869	-0.187674	1229.96	-1.04464	0.299005	-3.49373	0.000476316	0.00655754
BRCA	ENSG00000070882	OSBPL3	cg06779123	chr7:24981343	CGI:chr7:24981394-24981901	gene body,promoter	0.174518	0.364477	-2.88608	0.00390076	0.0184452	-0.189959	1229.96	-1.04464	0.299005	-3.49373	0.000476316	0.00655754
BRCA	ENSG00000070882	OSBPL3	cg09396895	chr7:24981448	CGI:chr7:24981394-24981901	gene body,UTR,exon,promoter	0.215908	0.404533	-2.59044	0.0095852	0.026246	-0.188624	1229.96	-1.04464	0.299005	-3.49373	0.000476316	0.00655754
BRCA	ENSG00000070882	OSBPL3	cg09742170	chr7:24981589	CGI:chr7:24981394-24981901	gene body,UTR,exon,promoter	0.166867	0.272063	-2.89047	0.00384669	0.018341	-0.105196	1229.96	-1.04464	0.299005	-3.49373	0.000476316	0.00655754
BRCA	ENSG00000070882	OSBPL3	cg15977719	chr7:24981884	CGI:chr7:24981394-24981901	promoter	0.0840603	0.206486	-3.14512	0.00166018	0.0123918	-0.122426	1229.96	-1.04464	0.299005	-3.49373	0.000476316	0.00655754
BRCA	ENSG00000078399	HOXA9	cg21172377	chr7:27174274	CGI:chr7:27172797-27174777	gene body,promoter	0.448117	0.658511	-2.75436	0.0058807	0.0217509	-0.210394	202.762	-1.75486	0.519423	-3.37847	0.000728901	0.00892055
BRCA	ENSG00000078399	HOXA9	cg18243072	chr7:27174331	CGI:chr7:27172797-27174777	gene body,promoter	0.331646	0.588296	-2.89925	0.00374057	0.0181345	-0.25665	202.762	-1.75486	0.519423	-3.37847	0.000728901	0.00892055
BRCA	ENSG00000078399	HOXA9	cg01397139	chr7:27174347	CGI:chr7:27172797-27174777	gene body,promoter	0.254478	0.386137	-2.13529	0.0327375	0.042455	-0.131659	202.762	-1.75486	0.519423	-3.37847	0.000728901	0.00892055
BRCA	ENSG00000078399	HOXA9	cg01215762	chr7:27174507	CGI:chr7:27172797-27174777	gene body,promoter	0.559284	0.744854	-2.0987	0.0358434	0.0440171	-0.185569	202.762	-1.75486	0.519423	-3.37847	0.000728901	0.00892055
BRCA	ENSG00000078399	HOXA9	cg14649140	chr7:27174582	CGI:chr7:27172797-27174777	gene body,promoter	0.369685	0.593718	-3.11731	0.00182506	0.0130204	-0.224033	202.762	-1.75486	0.519423	-3.37847	0.000728901	0.00892055
BRCA	ENSG00000253293	HOXA10	cg05210501	chr7:27179725	CGI:chr7:27179690-27180131	gene body,UTR,exon,promoter	0.592448	0.724521	-2.1909	0.0284589	0.0400829	-0.132072	250.851	-1.2264	0.421387	-2.9104	0.00360966	0.0282141
BRCA	ENSG00000136286	MYO1G	cg12416569	chr7:44979158	CGI:chr7:44986359-44987027	promoter	0.604523	0.740117	-3.32075	0.000897774	0.00883345	-0.135594	631.138	-1.07748	0.328646	-3.27854	0.00104344	0.0116769
BRCA	ENSG00000136286	MYO1G	cg07826859	chr7:44980487	CGI:chr7:44986359-44987027	promoter	0.551363	0.754767	-3.32806	0.000874521	0.00869923	-0.203404	631.138	-1.07748	0.328646	-3.27854	0.00104344	0.0116769
BRCA	ENSG00000185811	IKZF1	cg18810347	chr7:50304646	CGI:chr7:50303299-50304923	gene body,promoter	0.167626	0.334591	-3.09244	0.00198522	0.0135592	-0.166965	1135.6	-1.31921	0.354134	-3.72518	0.000195177	0.00344215
BRCA	ENSG00000185811	IKZF1	cg00547441	chr7:50305128	CGI:chr7:50303299-50304923	gene body,promoter	0.178055	0.354013	-2.5641	0.0103443	0.0270117	-0.175959	1135.6	-1.31921	0.354134	-3.72518	0.000195177	0.00344215
BRCA	ENSG00000146757	ZNF92	cg08326497	chr7:65372591	CGI:chr7:65374071-65374300	promoter	0.86518	0.649863	2.99877	0.00271073	0.0157489	0.215318	2260.03	1.11892	0.32941	3.39673	0.000681967	0.00855115
BRCA	ENSG00000105810	CDK6	cg16527334	chr7:92835567	CGI:chr7:92832887-92837073	gene body,promoter	0.1199	0.271855	-2.88754	0.00388266	0.0184051	-0.151955	2232.25	-1.85283	0.405695	-4.56704	4.94656e-06	0.000211448
BRCA	ENSG00000105810	CDK6	cg23271606	chr7:92835577	CGI:chr7:92832887-92837073	gene body,promoter	0.174281	0.28498	-2.65777	0.00786602	0.0243826	-0.110699	2232.25	-1.85283	0.405695	-4.56704	4.94656e-06	0.000211448
BRCA	ENSG00000105810	CDK6	cg07469637	chr7:92837072	CGI:chr7:92832887-92837073	promoter	0.564938	0.726261	-2.19529	0.0281426	0.0399035	-0.161323	2232.25	-1.85283	0.405695	-4.56704	4.94656e-06	0.000211448
BRCA	ENSG00000105880	DLX5	cg06537230	chr7:97023871	CGI:chr7:97024155-97024668	gene body,promoter	0.373051	0.503533	-2.35189	0.0186783	0.0340816	-0.130482	138.067	-1.48414	0.551423	-2.69148	0.00711358	0.0456585
BRCA	ENSG00000105880	DLX5	cg07548367	chr7:97024840	CGI:chr7:97024155-97024668	gene body,UTR,exon,promoter	0.240502	0.431486	-2.18505	0.0288854	0.0403509	-0.190984	138.067	-1.48414	0.551423	-2.69148	0.00711358	0.0456585
BRCA	ENSG00000105880	DLX5	cg20250426	chr7:97025793	CGI:chr7:97024155-97024668	promoter	0.435205	0.322777	2.00942	0.0444922	0.0478323	0.112429	138.067	-1.48414	0.551423	-2.69148	0.00711358	0.0456585
BRCA	ENSG00000105929	ATP6V0A4	cg02491878	chr7:138797835	CGI:chr7:138867915-138868124	gene body,promoter	0.558463	0.668472	-2.01674	0.0437225	0.0475406	-0.110008	449.52	-3.41547	0.671898	-5.08332	3.70896e-07	2.8689e-05
BRCA	ENSG00000105929	ATP6V0A4	cg07429038	chr7:138798081	CGI:chr7:138867915-138868124	gene body,UTR,exon,promoter	0.508736	0.686234	-2.83046	0.00464806	0.0197656	-0.177498	449.52	-3.41547	0.671898	-5.08332	3.70896e-07	2.8689e-05
BRCA	ENSG00000106123	EPHB6	cg24680924	chr7:142855178	CGI:chr7:142854117-142855424	gene body,UTR,exon,promoter	0.0774041	0.270041	-3.18464	0.00144936	0.0115507	-0.192637	534.794	-1.38891	0.488143	-2.84529	0.00443716	0.0328023
BRCA	ENSG00000106123	EPHB6	cg07877229	chr7:142856545	CGI:chr7:142854117-142855424	gene body,promoter	0.624186	0.519836	2.16602	0.0303095	0.0411458	0.10435	534.794	-1.38891	0.488143	-2.84529	0.00443716	0.0328023
BRCA	ENSG00000106123	EPHB6	cg12599168	chr7:142856777	CGI:chr7:142854117-142855424	gene body,promoter	0.408946	0.300155	2.46604	0.0136614	0.0300834	0.108791	534.794	-1.38891	0.488143	-2.84529	0.00443716	0.0328023
BRCA	ENSG00000100170	SLC5A1	cg26730347	chr22:32042960	CGI:chr22:32043059-32043455	promoter	0.352696	0.544298	-2.22456	0.0261106	0.0387353	-0.191602	955.557	-3.77979	0.667393	-5.66351	1.48305e-08	2.36599e-06
BRCA	ENSG00000100170	SLC5A1	cg03962522	chr22:32043267	CGI:chr22:32043059-32043455	gene body,UTR,exon,promoter	0.55017	0.658035	-2.17919	0.0293173	0.0406104	-0.107864	955.557	-3.77979	0.667393	-5.66351	1.48305e-08	2.36599e-06
BRCA	ENSG00000100170	SLC5A1	cg00500507	chr22:32043404	CGI:chr22:32043059-32043455	gene body,CDS,exon,promoter	0.510602	0.627962	-2.15724	0.0309869	0.0415483	-0.11736	955.557	-3.77979	0.667393	-5.66351	1.48305e-08	2.36599e-06
BRCA	ENSG00000100368	CSF2RB	cg11520459	chr22:36912140	CGI:chr22:36856433-36856667	promoter	0.810495	0.662597	2.00357	0.0451161	0.0480978	0.147898	1027.98	-1.44529	0.367529	-3.93245	8.40829e-05	0.00180793
BRCA	ENSG00000100368	CSF2RB	cg02556928	chr22:36913938	CGI:chr22:36856433-36856667	gene body,promoter	0.772578	0.594946	2.17919	0.0293173	0.0406104	0.177632	1027.98	-1.44529	0.367529	-3.93245	8.40829e-05	0.00180793
BRCA	ENSG00000235568	NFAM1	cg17568996	chr22:42432119	CGI:chr22:42368383-42369242	gene body,promoter	0.422583	0.589161	-2.41336	0.0158063	0.0319099	-0.166578	731.527	-1.0146	0.299074	-3.39246	0.000692669	0.00862992
BRCA	ENSG00000235568	NFAM1	cg01383955	chr22:42432441	CGI:chr22:42368383-42369242	promoter	0.616754	0.754525	-2.37238	0.0176739	0.0333511	-0.137771	731.527	-1.0146	0.299074	-3.39246	0.000692669	0.00862992
BRCA	ENSG00000100304	TTLL12	cg04936242	chr22:43185417	CGI:chr22:43186673-43187824	gene body,promoter	0.729195	0.583348	2.6446	0.00817886	0.024723	0.145847	6636.41	1.34276	0.280695	4.7837	1.72095e-06	9.26203e-05
BRCA	ENSG00000186951	PPARA	cg09829176	chr22:46149444	CGI:chr22:46149577-46151509	promoter	0.424587	0.619175	-2.50849	0.0121249	0.0286883	-0.194588	994.184	-1.06527	0.28438	-3.74593	0.000179727	0.003234
BRCA	ENSG00000183943	PRKX	cg17028443	chrX:3712045	CGI:chrX:3712365-3712579	gene body,promoter	0.524091	0.659481	-2.02406	0.042964	0.047218	-0.13539	2009.73	-1.27946	0.340606	-3.75643	0.000172356	0.00313227
BRCA	ENSG00000101871	MID1	cg05093999	chrX:10833670	CGI:chrX:10620159-10620446	promoter	0.349383	0.210403	3.85347	0.000116456	0.0019103	0.138979	855.022	-1.83374	0.425709	-4.3075	1.65112e-05	0.00052032
BRCA	ENSG00000101871	MID1	cg19790752	chrX:10834854	CGI:chrX:10620159-10620446	promoter	0.694354	0.84706	-2.17773	0.0294262	0.0406779	-0.152706	855.022	-1.83374	0.425709	-4.3075	1.65112e-05	0.00052032
BRCA	ENSG00000198759	EGFL6	cg03717635	chrX:13568736	CGI:chrX:13569529-13570102	promoter	0.777997	0.909474	-3.75688	0.000172047	0.00265937	-0.131477	305.045	-1.2679	0.443495	-2.85888	0.00425136	0.0317307
BRCA	ENSG00000198759	EGFL6	cg12817924	chrX:13570043	CGI:chrX:13569529-13570102	gene body,promoter	0.343202	0.490937	-1.96991	0.0488488	0.0494932	-0.147736	305.045	-1.2679	0.443495	-2.85888	0.00425136	0.0317307
BRCA	ENSG00000046653	GPM6B	cg04032096	chrX:13936771	CGI:chrX:13938108-13938942	gene body,promoter	0.564313	0.855841	-4.02178	5.77611e-05	0.00109997	-0.291527	980.807	-1.16256	0.386473	-3.00812	0.00262866	0.0226903
BRCA	ENSG00000046653	GPM6B	cg07768843	chrX:13936983	CGI:chrX:13938108-13938942	gene body,promoter	0.703989	0.874127	-4.01738	5.88476e-05	0.0011078	-0.170138	980.807	-1.16256	0.386473	-3.00812	0.00262866	0.0226903
BRCA	ENSG00000046653	GPM6B	cg03003060	chrX:13938047	CGI:chrX:13938108-13938942	gene body,promoter	0.233568	0.0787963	4.15935	3.19159e-05	0.000658127	0.154772	980.807	-1.16256	0.386473	-3.00812	0.00262866	0.0226903
BRCA	ENSG00000046653	GPM6B	cg21229055	chrX:13939114	CGI:chrX:13938108-13938942	promoter	0.500031	0.672822	-2.78948	0.0052792	0.0208393	-0.172791	980.807	-1.16256	0.386473	-3.00812	0.00262866	0.0226903
BRCA	ENSG00000046653	GPM6B	cg17588373	chrX:13939298	CGI:chrX:13938108-13938942	promoter	0.497398	0.629044	-2.3636	0.0180984	0.0336571	-0.131646	980.807	-1.16256	0.386473	-3.00812	0.00262866	0.0226903
BRCA	ENSG00000046653	GPM6B	cg21745079	chrX:13939471	CGI:chrX:13938108-13938942	promoter	0.656041	0.863225	-3.7159	0.000202483	0.00305371	-0.207184	980.807	-1.16256	0.386473	-3.00812	0.00262866	0.0226903
BRCA	ENSG00000102048	ASB9	cg18515545	chrX:15270190	CGI:chrX:15335247-15335886	gene body,UTR,exon,promoter	0.243361	0.136456	3.90177	9.54934e-05	0.00161877	0.106904	140.553	-1.43326	0.360619	-3.97445	7.05433e-05	0.00156481
BRCA	ENSG00000102048	ASB9	cg08973369	chrX:15270450	CGI:chrX:15335247-15335886	gene body,UTR,exon,promoter	0.255105	0.437168	-3.51686	0.000436687	0.00548837	-0.182063	140.553	-1.43326	0.360619	-3.97445	7.05433e-05	0.00156481
BRCA	ENSG00000102048	ASB9	cg01540916	chrX:15270633	CGI:chrX:15335247-15335886	promoter	0.528741	0.782999	-2.76168	0.00575052	0.021566	-0.254258	140.553	-1.43326	0.360619	-3.97445	7.05433e-05	0.00156481
BRCA	ENSG00000130234	ACE2	cg16734967	chrX:15601980	CGI:chrX:15646618-15647055	gene body,UTR,exon,promoter	0.588658	0.84276	-2.90071	0.00372315	0.0181077	-0.254102	109.24	-4.94126	0.782151	-6.31753	2.65772e-10	9.69146e-08
BRCA	ENSG00000130234	ACE2	cg21598868	chrX:15603044	CGI:chrX:15646618-15647055	promoter	0.795104	0.906299	-3.37782	0.000730621	0.00776854	-0.111195	109.24	-4.94126	0.782151	-6.31753	2.65772e-10	9.69146e-08
BRCA	ENSG00000147027	TMEM47	cg05078775	chrX:34656566	CGI:chrX:34656390-34657610	gene body,promoter	0.432465	0.275099	2.64167	0.00824988	0.0248111	0.157366	1907.1	-1.16801	0.392131	-2.97862	0.00289545	0.0242668
BRCA	ENSG00000147027	TMEM47	cg04051266	chrX:34657431	CGI:chrX:34656390-34657610	promoter	0.293561	0.0405224	5.15016	2.6027e-07	1.15791e-05	0.253039	1907.1	-1.16801	0.392131	-2.97862	0.00289545	0.0242668
BRCA	ENSG00000147027	TMEM47	cg21290885	chrX:34657738	CGI:chrX:34656390-34657610	promoter	0.169108	0.0685546	3.66028	0.000251936	0.00362874	0.100553	1907.1	-1.16801	0.392131	-2.97862	0.00289545	0.0242668
BRCA	ENSG00000147027	TMEM47	cg03842291	chrX:34657847	CGI:chrX:34656390-34657610	promoter	0.387196	0.108004	4.6789	2.88419e-06	7.3533e-05	0.279193	1907.1	-1.16801	0.392131	-2.97862	0.00289545	0.0242668
BRCA	ENSG00000156298	TSPAN7	cg20450764	chrX:38561073	CGI:chrX:38562012-38562225	promoter	0.262551	0.123403	2.33433	0.0195786	0.0346518	0.139148	598.92	-1.36428	0.375342	-3.63477	0.000278229	0.00453594
BRCA	ENSG00000156298	TSPAN7	cg15170964	chrX:38561165	CGI:chrX:38562012-38562225	promoter	0.402226	0.119249	4.01592	5.9214e-05	0.0011078	0.282977	598.92	-1.36428	0.375342	-3.63477	0.000278229	0.00453594
BRCA	ENSG00000156298	TSPAN7	cg13431666	chrX:38561183	CGI:chrX:38562012-38562225	promoter	0.44291	0.0850905	4.79452	1.63066e-06	4.40917e-05	0.35782	598.92	-1.36428	0.375342	-3.63477	0.000278229	0.00453594
BRCA	ENSG00000156298	TSPAN7	cg26032662	chrX:38561758	CGI:chrX:38562012-38562225	gene body,promoter	0.236391	0.0533615	5.1004	3.38944e-07	1.22842e-05	0.183029	598.92	-1.36428	0.375342	-3.63477	0.000278229	0.00453594
BRCA	ENSG00000156298	TSPAN7	cg21516819	chrX:38561825	CGI:chrX:38562012-38562225	gene body,promoter	0.24421	0.0765602	4.74622	2.07251e-06	5.44989e-05	0.16765	598.92	-1.36428	0.375342	-3.63477	0.000278229	0.00453594
BRCA	ENSG00000156298	TSPAN7	cg14071112	chrX:38562250	CGI:chrX:38562012-38562225	gene body,promoter	0.44754	0.177607	3.96031	7.48534e-05	0.00131069	0.269934	598.92	-1.36428	0.375342	-3.63477	0.000278229	0.00453594
BRCA	ENSG00000124479	NDP	cg05313317	chrX:43973835	CGI:chrX:43882053-43882581	promoter	0.473297	0.599277	-2.04162	0.0411891	0.0464815	-0.125979	494.308	-2.14175	0.735423	-2.91227	0.00358817	0.0281126
BRCA	ENSG00000124479	NDP	cg07642259	chrX:43973884	CGI:chrX:43882053-43882581	promoter	0.498968	0.635056	-2.79241	0.00523167	0.0207483	-0.136088	494.308	-2.14175	0.735423	-2.91227	0.00358817	0.0281126
BRCA	ENSG00000147168	IL2RG	cg01361446	chrX:71111465	CGI:chrX:71118430-71119016	UTR,gene body,promoter,CDS,exon	0.528965	0.775796	-4.05983	4.91091e-05	0.000964837	-0.246831	1851.8	-1.47454	0.424113	-3.47676	0.000507518	0.00685437
BRCA	ENSG00000147168	IL2RG	cg17388653	chrX:71111622	CGI:chrX:71118430-71119016	gene body,UTR,exon,promoter	0.36248	0.604802	-3.69834	0.000217018	0.00322928	-0.242322	1851.8	-1.47454	0.424113	-3.47676	0.000507518	0.00685437
BRCA	ENSG00000147168	IL2RG	cg05335577	chrX:71111643	CGI:chrX:71118430-71119016	gene body,promoter	0.532533	0.681598	-3.0939	0.00197545	0.0135298	-0.149065	1851.8	-1.47454	0.424113	-3.47676	0.000507518	0.00685437
BRCA	ENSG00000147168	IL2RG	cg18418655	chrX:71111707	CGI:chrX:71118430-71119016	gene body,promoter	0.507695	0.705707	-3.34563	0.000820972	0.00838065	-0.198013	1851.8	-1.47454	0.424113	-3.47676	0.000507518	0.00685437
BRCA	ENSG00000147168	IL2RG	cg23735003	chrX:71111912	CGI:chrX:71118430-71119016	gene body,promoter	0.778067	0.897361	-2.8773	0.00401099	0.0186465	-0.119295	1851.8	-1.47454	0.424113	-3.47676	0.000507518	0.00685437
BRCA	ENSG00000147168	IL2RG	cg15201909	chrX:71112111	CGI:chrX:71118430-71119016	promoter	0.675343	0.876543	-4.17984	2.91719e-05	0.000605459	-0.2012	1851.8	-1.47454	0.424113	-3.47676	0.000507518	0.00685437
BRCA	ENSG00000169562	GJB1	cg25226068	chrX:71213759	CGI:chrX:71224196-71224420	promoter	0.712626	0.850901	-3.19635	0.0013918	0.0112991	-0.138275	312.409	-2.43229	0.739784	-3.28784	0.00100959	0.0114029
BRCA	ENSG00000169562	GJB1	cg25704253	chrX:71214801	CGI:chrX:71224196-71224420	promoter	0.561129	0.746098	-3.6354	0.000277545	0.0039184	-0.184969	312.409	-2.43229	0.739784	-3.28784	0.00100959	0.0114029
BRCA	ENSG00000169562	GJB1	cg25549758	chrX:71215232	CGI:chrX:71224196-71224420	gene body,UTR,exon,promoter	0.563226	0.769254	-3.50076	0.000463935	0.00574565	-0.206028	312.409	-2.43229	0.739784	-3.28784	0.00100959	0.0114029
BRCA	ENSG00000078589	P2RY10	cg13088755	chrX:78944544	CGI:chrX:78139334-78139795	promoter	0.667969	0.927761	-4.99502	5.88292e-07	1.84119e-05	-0.259792	170.006	-2.03958	0.481911	-4.23227	2.31346e-05	0.00068066
BRCA	ENSG00000078589	P2RY10	cg23079782	chrX:78945424	CGI:chrX:78139334-78139795	gene body,UTR,exon,promoter	0.366296	0.491861	-2.18066	0.0292088	0.0405381	-0.125565	170.006	-2.03958	0.481911	-4.23227	2.31346e-05	0.00068066
BRCA	ENSG00000147180	ZNF711	cg23196584	chrX:85242863	CGI:chrX:85243766-85244878	promoter	0.645024	0.784093	-3.18756	0.00143477	0.011496	-0.139069	541.948	-1.55703	0.415934	-3.74346	0.000181505	0.00325943
BRCA	ENSG00000147180	ZNF711	cg25730864	chrX:85243931	CGI:chrX:85243766-85244878	promoter	0.282781	0.095087	4.03495	5.46146e-05	0.00105505	0.187694	541.948	-1.55703	0.415934	-3.74346	0.000181505	0.00325943
BRCA	ENSG00000147180	ZNF711	cg24415468	chrX:85244073	CGI:chrX:85243766-85244878	gene body,UTR,exon,promoter	0.295274	0.106759	4.58231	4.59875e-06	0.00011188	0.188516	541.948	-1.55703	0.415934	-3.74346	0.000181505	0.00325943
BRCA	ENSG00000147180	ZNF711	cg16391404	chrX:85244516	CGI:chrX:85243766-85244878	gene body,promoter	0.411091	0.13303	4.12569	3.69631e-05	0.000752018	0.278061	541.948	-1.55703	0.415934	-3.74346	0.000181505	0.00325943
BRCA	ENSG00000158164	TMSB15A	cg16068020	chrX:102516030	CGI:chrX:102516409-102516745	gene body,promoter	0.279313	0.163621	3.63687	0.000275974	0.00390197	0.115692	179.195	-2.11533	0.588946	-3.59172	0.000328499	0.00507969
BRCA	ENSG00000158164	TMSB15A	cg16063272	chrX:102516294	CGI:chrX:102516409-102516745	gene body,promoter	0.335001	0.0791769	5.06966	3.98524e-07	1.3501e-05	0.255824	179.195	-2.11533	0.588946	-3.59172	0.000328499	0.00507969
BRCA	ENSG00000158164	TMSB15A	cg03933846	chrX:102516929	CGI:chrX:102516409-102516745	promoter	0.463093	0.172022	4.0086	6.10788e-05	0.00112602	0.291071	179.195	-2.11533	0.588946	-3.59172	0.000328499	0.00507969
BRCA	ENSG00000158164	TMSB15A	cg01737010	chrX:102517086	CGI:chrX:102516409-102516745	promoter	0.465904	0.221746	3.39978	0.000674411	0.00736257	0.244158	179.195	-2.11533	0.588946	-3.59172	0.000328499	0.00507969
BRCA	ENSG00000123560	PLP1	cg09484077	chrX:103775036	CGI:chrX:103687179-103687558	gene body,promoter	0.724192	0.910516	-4.14618	3.38075e-05	0.000693504	-0.186324	163.374	-2.78974	0.625049	-4.46323	8.07318e-06	0.00031291
BRCA	ENSG00000123560	PLP1	cg16135771	chrX:103775221	CGI:chrX:103687179-103687558	gene body,promoter	0.525845	0.774157	-3.94421	8.0064e-05	0.00139246	-0.248312	163.374	-2.78974	0.625049	-4.46323	8.07318e-06	0.00031291
BRCA	ENSG00000123560	PLP1	cg06253229	chrX:103775665	CGI:chrX:103687179-103687558	gene body,promoter	0.775439	0.892902	-3.33392	0.000856322	0.00858706	-0.117463	163.374	-2.78974	0.625049	-4.46323	8.07318e-06	0.00031291
BRCA	ENSG00000133135	RNF128	cg12173181	chrX:106692920	CGI:chrX:106726456-106727368	promoter	0.385609	0.207987	3.41002	0.00064958	0.00719468	0.177622	460.655	-1.73089	0.508206	-3.40588	0.000659514	0.00835758
BRCA	ENSG00000133135	RNF128	cg06871279	chrX:106693891	CGI:chrX:106726456-106727368	gene body,UTR,exon,promoter	0.384439	0.185968	3.98665	6.70126e-05	0.00120489	0.198471	460.655	-1.73089	0.508206	-3.40588	0.000659514	0.00835758
BRCA	ENSG00000101938	CHRDL1	cg25903474	chrX:110796244	CGI:chrX:110795718-110796142	promoter	0.539446	0.271853	3.45832	0.000543561	0.00641169	0.267593	972.297	-2.12175	0.558091	-3.80181	0.000143643	0.00272464
BRCA	ENSG00000077274	CAPN6	cg24149658	chrX:111270589	CGI:chrX:111096136-111096451	promoter	0.411516	0.61861	-3.42612	0.000612271	0.00694218	-0.207094	631.378	-4.21534	0.73141	-5.7633	8.24858e-09	1.45926e-06
BRCA	ENSG00000077274	CAPN6	cg19688503	chrX:111270713	CGI:chrX:111096136-111096451	promoter	0.353324	0.606801	-3.26513	0.00109413	0.00993098	-0.253477	631.378	-4.21534	0.73141	-5.7633	8.24858e-09	1.45926e-06
BRCA	ENSG00000077274	CAPN6	cg00785877	chrX:111270729	CGI:chrX:111096136-111096451	promoter	0.653931	0.812295	-3.13049	0.00174517	0.012709	-0.158365	631.378	-4.21534	0.73141	-5.7633	8.24858e-09	1.45926e-06
BRCA	ENSG00000077274	CAPN6	cg00426668	chrX:111271003	CGI:chrX:111096136-111096451	promoter	0.39663	0.662972	-3.07195	0.00212668	0.0140443	-0.266342	631.378	-4.21534	0.73141	-5.7633	8.24858e-09	1.45926e-06
BRCA	ENSG00000268104	SLC6A14	cg08975046	chrX:116435244	CGI:chrX:115968702-115969064	promoter	0.716528	0.882091	-3.53442	0.00040867	0.0052225	-0.165564	654.71	-4.9748	0.813808	-6.11298	9.77855e-10	2.73005e-07
BRCA	ENSG00000268104	SLC6A14	cg07358738	chrX:116437897	CGI:chrX:115968702-115969064	gene body,CDS,exon,promoter	0.688825	0.930659	-4.90428	9.37693e-07	2.70819e-05	-0.241834	654.71	-4.9748	0.813808	-6.11298	9.77855e-10	2.73005e-07
BRCA	ENSG00000204019	CT83	cg19974994	chrX:116462996	CGI:chrX:115968702-115969064	gene body,UTR,exon,promoter	0.797874	0.932656	-4.04373	5.26079e-05	0.00102397	-0.134782	73.7965	-23.527	2.2583	-10.418	2.0517e-25	4.58247e-22
BRCA	ENSG00000204019	CT83	cg19500599	chrX:116463809	CGI:chrX:115968702-115969064	promoter	0.703376	0.877602	-4.07446	4.61208e-05	0.000914171	-0.174226	73.7965	-23.527	2.2583	-10.418	2.0517e-25	4.58247e-22
BRCA	ENSG00000003096	KLHL13	cg17035182	chrX:118116773	CGI:chrX:118116270-118117066	gene body,UTR,exon,promoter	0.536063	0.0676856	5.16333	2.42598e-07	1.15791e-05	0.468377	494.232	-1.8865	0.462184	-4.08172	4.47041e-05	0.00110175
BRCA	ENSG00000003096	KLHL13	cg20786418	chrX:118117037	CGI:chrX:118116270-118117066	gene body,promoter	0.419835	0.107936	5.14137	2.72736e-07	1.15791e-05	0.311899	494.232	-1.8865	0.462184	-4.08172	4.47041e-05	0.00110175
BRCA	ENSG00000003096	KLHL13	cg05434903	chrX:118117155	CGI:chrX:118116270-118117066	gene body,promoter	0.377466	0.0363124	5.1604	2.46422e-07	1.15791e-05	0.341154	494.232	-1.8865	0.462184	-4.08172	4.47041e-05	0.00110175
BRCA	ENSG00000003096	KLHL13	cg11708870	chrX:118117160	CGI:chrX:118116270-118117066	gene body,promoter	0.375336	0.0428789	5.16333	2.42598e-07	1.15791e-05	0.332457	494.232	-1.8865	0.462184	-4.08172	4.47041e-05	0.00110175
BRCA	ENSG00000003096	KLHL13	cg05478253	chrX:118118459	CGI:chrX:118116270-118117066	promoter	0.5707	0.801048	-3.78615	0.000153001	0.00240436	-0.230348	494.232	-1.8865	0.462184	-4.08172	4.47041e-05	0.00110175
BRCA	ENSG00000183918	SH2D1A	cg07980988	chrX:124346163	CGI:chrX:124332835-124333347	promoter	0.636096	0.84627	-4.01446	5.95826e-05	0.00111066	-0.210173	208.042	-1.55559	0.4968	-3.13122	0.00174081	0.0169232
BRCA	ENSG00000183918	SH2D1A	cg10573235	chrX:124346427	CGI:chrX:124332835-124333347	gene body,UTR,exon,promoter	0.619368	0.812016	-3.02658	0.0024734	0.0150914	-0.192648	208.042	-1.55559	0.4968	-3.13122	0.00174081	0.0169232
BRCA	ENSG00000183918	SH2D1A	cg25248094	chrX:124346454	CGI:chrX:124332835-124333347	gene body,UTR,exon,promoter	0.498226	0.786735	-3.79639	0.000146817	0.0023219	-0.288509	208.042	-1.55559	0.4968	-3.13122	0.00174081	0.0169232
BRCA	ENSG00000183918	SH2D1A	cg00467547	chrX:124346744	CGI:chrX:124332835-124333347	gene body,CDS,exon,promoter	0.719434	0.929552	-4.63792	3.51932e-06	8.78531e-05	-0.210117	208.042	-1.55559	0.4968	-3.13122	0.00174081	0.0169232
BRCA	ENSG00000122122	SASH3	cg02200373	chrX:129779602	CGI:chrX:129843564-129844022	promoter	0.602453	0.734055	-3.75249	0.000175089	0.00269767	-0.131602	1127.03	-1.02669	0.327769	-3.13237	0.00173399	0.0168752
BRCA	ENSG00000122122	SASH3	cg04499381	chrX:129779695	CGI:chrX:129843564-129844022	promoter	0.632619	0.827762	-4.18862	2.80659e-05	0.000585042	-0.195144	1127.03	-1.02669	0.327769	-3.13237	0.00173399	0.0168752
BRCA	ENSG00000122122	SASH3	cg10649042	chrX:129779810	CGI:chrX:129843564-129844022	promoter	0.658507	0.821673	-3.28562	0.00101758	0.00951464	-0.163166	1127.03	-1.02669	0.327769	-3.13237	0.00173399	0.0168752
BRCA	ENSG00000122122	SASH3	cg07172550	chrX:129779866	CGI:chrX:129843564-129844022	promoter	0.592003	0.766814	-3.36758	0.000758315	0.00796814	-0.174811	1127.03	-1.02669	0.327769	-3.13237	0.00173399	0.0168752
BRCA	ENSG00000122122	SASH3	cg05872215	chrX:129779878	CGI:chrX:129843564-129844022	promoter	0.591897	0.773545	-4.00275	6.26106e-05	0.0011448	-0.181648	1127.03	-1.02669	0.327769	-3.13237	0.00173399	0.0168752
BRCA	ENSG00000122122	SASH3	cg22474124	chrX:129779900	CGI:chrX:129843564-129844022	promoter	0.508337	0.779897	-4.21057	2.54727e-05	0.000535317	-0.27156	1127.03	-1.02669	0.327769	-3.13237	0.00173399	0.0168752
BRCA	ENSG00000122122	SASH3	cg05414556	chrX:129779946	CGI:chrX:129843564-129844022	promoter	0.640261	0.805319	-4.21496	2.49821e-05	0.000526661	-0.165058	1127.03	-1.02669	0.327769	-3.13237	0.00173399	0.0168752
BRCA	ENSG00000122122	SASH3	cg18091964	chrX:129780004	CGI:chrX:129843564-129844022	gene body,UTR,exon,promoter	0.772543	0.88296	-3.09536	0.00196573	0.0135005	-0.110417	1127.03	-1.02669	0.327769	-3.13237	0.00173399	0.0168752
BRCA	ENSG00000147256	ARHGAP36	cg00743412	chrX:131057814	CGI:chrX:131058157-131058761	promoter	0.701325	0.840247	-3.4027	0.000667228	0.00731515	-0.138922	134.324	-3.20021	1.11073	-2.88118	0.00396191	0.0301368
BRCA	ENSG00000147256	ARHGAP36	cg10646080	chrX:131057847	CGI:chrX:131058157-131058761	promoter	0.650824	0.779191	-3.12902	0.00175388	0.0127351	-0.128366	134.324	-3.20021	1.11073	-2.88118	0.00396191	0.0301368
BRCA	ENSG00000147256	ARHGAP36	cg27204474	chrX:131057860	CGI:chrX:131058157-131058761	promoter	0.641079	0.744609	-2.94755	0.00320307	0.0169374	-0.103531	134.324	-3.20021	1.11073	-2.88118	0.00396191	0.0301368
BRCA	ENSG00000147256	ARHGAP36	cg10142252	chrX:131058061	CGI:chrX:131058157-131058761	promoter	0.46031	0.659112	-3.15683	0.00159494	0.0121362	-0.198802	134.324	-3.20021	1.11073	-2.88118	0.00396191	0.0301368
BRCA	ENSG00000147256	ARHGAP36	cg00809111	chrX:131058160	CGI:chrX:131058157-131058761	promoter	0.537501	0.712254	-3.72614	0.000194432	0.00294822	-0.174753	134.324	-3.20021	1.11073	-2.88118	0.00396191	0.0301368
BRCA	ENSG00000147256	ARHGAP36	cg08046324	chrX:131058760	CGI:chrX:131058157-131058761	gene body,promoter	0.484151	0.314274	2.76607	0.00567367	0.0214653	0.169877	134.324	-3.20021	1.11073	-2.88118	0.00396191	0.0301368
BRCA	ENSG00000102243	VGLL1	cg21462299	chrX:136531893	CGI:chrX:136496842-136497940	promoter	0.785227	0.887076	-2.1309	0.0330976	0.0426461	-0.101849	538.594	-6.3464	0.949155	-6.68636	2.28787e-11	1.3187e-08
BRCA	ENSG00000102243	VGLL1	cg15567182	chrX:136532208	CGI:chrX:136496842-136497940	gene body,UTR,exon,promoter	0.734392	0.940557	-4.6145	3.94035e-06	9.70252e-05	-0.206164	538.594	-6.3464	0.949155	-6.68636	2.28787e-11	1.3187e-08
BRCA	ENSG00000182195	LDOC1	cg20104776	chrX:141176991	CGI:chrX:141176765-141177220	gene body,CDS,exon,promoter	0.527527	0.121594	5.16333	2.42598e-07	1.15791e-05	0.405933	3316.47	1.42679	0.295479	4.82873	1.37408e-06	7.76962e-05
BRCA	ENSG00000182195	LDOC1	cg00917018	chrX:141177364	CGI:chrX:141176765-141177220	promoter	0.428614	0.0567205	2.88754	0.00388266	0.0184051	0.371894	3316.47	1.42679	0.295479	4.82873	1.37408e-06	7.76962e-05
BRCA	ENSG00000182195	LDOC1	cg19208477	chrX:141177419	CGI:chrX:141176765-141177220	promoter	0.203898	0.0512266	5.00234	5.66388e-07	1.78515e-05	0.152671	3316.47	1.42679	0.295479	4.82873	1.37408e-06	7.76962e-05
BRCA	ENSG00000182195	LDOC1	cg14562990	chrX:141177441	CGI:chrX:141176765-141177220	promoter	0.389642	0.0804067	5.14723	2.64363e-07	1.15791e-05	0.309235	3316.47	1.42679	0.295479	4.82873	1.37408e-06	7.76962e-05
BRCA	ENSG00000182195	LDOC1	cg15490039	chrX:141177534	CGI:chrX:141176765-141177220	promoter	0.203466	0.063673	4.75939	1.94175e-06	5.14035e-05	0.139793	3316.47	1.42679	0.295479	4.82873	1.37408e-06	7.76962e-05
BRCA	ENSG00000013619	MAMLD1	cg15730931	chrX:150361923	CGI:chrX:150361273-150365823	gene body,promoter	0.323436	0.211186	2.35482	0.0185318	0.0339772	0.11225	432.064	-1.10908	0.375051	-2.95714	0.00310508	0.0254386
BRCA	ENSG00000013619	MAMLD1	cg24605995	chrX:150362190	CGI:chrX:150361273-150365823	gene body,promoter	0.399731	0.242165	2.88169	0.00395552	0.0185327	0.157566	432.064	-1.10908	0.375051	-2.95714	0.00310508	0.0254386
BRCA	ENSG00000013619	MAMLD1	cg27389609	chrX:150362817	CGI:chrX:150361273-150365823	gene body,promoter	0.45108	0.262395	2.82315	0.00475549	0.0199376	0.188685	432.064	-1.10908	0.375051	-2.95714	0.00310508	0.0254386
BRCA	ENSG00000013619	MAMLD1	cg15953767	chrX:150362845	CGI:chrX:150361273-150365823	gene body,exon,promoter	0.467162	0.155352	4.59548	4.31757e-06	0.000105384	0.311811	432.064	-1.10908	0.375051	-2.95714	0.00310508	0.0254386
BRCA	ENSG00000013619	MAMLD1	cg25852925	chrX:150363260	CGI:chrX:150361273-150365823	gene body,promoter	0.384733	0.0674193	5.16333	2.42598e-07	1.15791e-05	0.317313	432.064	-1.10908	0.375051	-2.95714	0.00310508	0.0254386
BRCA	ENSG00000102683	SGCG	cg07126559	chr13:23180798	CGI:chr13:23159669-23160677	promoter	0.620114	0.473073	2.35774	0.0183864	0.0338896	0.147041	44.9982	-2.42513	0.638628	-3.79741	0.000146219	0.00275885
BRCA	ENSG00000133106	EPSTI1	cg26714230	chr13:42992506	CGI:chr13:42991938-42992372	promoter	0.541162	0.671812	-2.10016	0.0357145	0.0439612	-0.130651	1349.18	-1.03685	0.325278	-3.18757	0.00143473	0.014691
BRCA	ENSG00000133106	EPSTI1	cg03753191	chr13:42992766	CGI:chr13:42991938-42992372	promoter	0.560388	0.689117	-2.10016	0.0357145	0.0439612	-0.128728	1349.18	-1.03685	0.325278	-3.18757	0.00143473	0.014691
BRCA	ENSG00000057593	F7	cg24269657	chr13:113105457	CGI:chr13:113107252-113111220	promoter	0.377139	0.224404	2.75582	0.00585446	0.0217054	0.152735	517.536	-1.67994	0.601206	-2.79429	0.00520143	0.0369233
BRCA	ENSG00000057593	F7	cg20329620	chr13:113105580	CGI:chr13:113107252-113111220	promoter	0.478752	0.324064	2.39141	0.016784	0.0326772	0.154688	517.536	-1.67994	0.601206	-2.79429	0.00520143	0.0369233
BRCA	ENSG00000057593	F7	cg23772843	chr13:113105595	CGI:chr13:113107252-113111220	promoter	0.396814	0.267034	2.94169	0.00326425	0.0171069	0.129781	517.536	-1.67994	0.601206	-2.79429	0.00520143	0.0369233
BRCA	ENSG00000057593	F7	cg08266168	chr13:113105692	CGI:chr13:113107252-113111220	promoter	0.41862	0.259231	3.0134	0.00258334	0.0153852	0.159388	517.536	-1.67994	0.601206	-2.79429	0.00520143	0.0369233
BRCA	ENSG00000113430	IRX4	cg03287574	chr5:1886842	CGI:chr5:1881810-1887629	gene body,promoter	0.440941	0.627948	-2.5202	0.011729	0.0283462	-0.187007	197.78	-1.92358	0.658223	-2.92238	0.0034737	0.0275368
BRCA	ENSG00000113430	IRX4	cg14062050	chr5:1886880	CGI:chr5:1881810-1887629	gene body,UTR,exon,promoter	0.278219	0.460018	-2.50556	0.0122258	0.0287825	-0.181799	197.78	-1.92358	0.658223	-2.92238	0.0034737	0.0275368
BRCA	ENSG00000113430	IRX4	cg05658487	chr5:1887469	CGI:chr5:1881810-1887629	promoter	0.359826	0.526204	-2.25822	0.0239317	0.0374375	-0.166378	197.78	-1.92358	0.658223	-2.92238	0.0034737	0.0275368
BRCA	ENSG00000170549	IRX1	cg09232937	chr5:3595856	CGI:chr5:3594353-3603136	promoter	0.454829	0.600156	-2.06211	0.0391972	0.0455894	-0.145327	597.631	-3.27918	0.637621	-5.14283	2.70631e-07	2.21818e-05
BRCA	ENSG00000170549	IRX1	cg25410785	chr5:3597646	CGI:chr5:3594353-3603136	gene body,promoter	0.30925	0.418039	-2.21432	0.0268069	0.0391261	-0.108789	597.631	-3.27918	0.637621	-5.14283	2.70631e-07	2.21818e-05
BRCA	ENSG00000171522	PTGER4	cg04790357	chr5:40680314	CGI:chr5:40679400-40681979	gene body,UTR,exon,promoter	0.119518	0.291988	-2.71484	0.00663068	0.0227567	-0.17247	575.128	-1.03682	0.291596	-3.55568	0.000377009	0.00557648
BRCA	ENSG00000171522	PTGER4	cg04824304	chr5:40680448	CGI:chr5:40679400-40681979	gene body,UTR,exon,promoter	0.0840577	0.185366	-2.57142	0.0101283	0.0267869	-0.101308	575.128	-1.03682	0.291596	-3.55568	0.000377009	0.00557648
BRCA	ENSG00000171522	PTGER4	cg26597539	chr5:40680568	CGI:chr5:40679400-40681979	gene body,promoter	0.208115	0.377413	-2.51727	0.0118269	0.0284188	-0.169298	575.128	-1.03682	0.291596	-3.55568	0.000377009	0.00557648
BRCA	ENSG00000184838	PRR16	cg10698355	chr5:120465498	CGI:chr5:120464126-120464373	gene body,promoter	0.129315	0.240782	-2.37092	0.0177441	0.0334053	-0.111467	176.9	-1.09178	0.386248	-2.82662	0.00470415	0.0343697
BRCA	ENSG00000170476	MZB1	cg13500819	chr5:139389711	CGI:chr5:139392021-139395222	gene body,CDS,exon,promoter	0.755571	0.874669	-2.72802	0.00637164	0.0224073	-0.119098	1651.79	-2.15018	0.516491	-4.16306	3.14018e-05	0.000852715
BRCA	ENSG00000170476	MZB1	cg11623339	chr5:139389793	CGI:chr5:139392021-139395222	gene body,CDS,exon,promoter	0.665722	0.805496	-2.53776	0.0111565	0.0278232	-0.139773	1651.79	-2.15018	0.516491	-4.16306	3.14018e-05	0.000852715
BRCA	ENSG00000134516	DOCK2	cg21233722	chr5:169637656	CGI:chr5:169637266-169637698	gene body,promoter	0.543595	0.692258	-2.81436	0.00488738	0.0201364	-0.148662	1469.16	-1.08732	0.316464	-3.43585	0.000590705	0.00767616
BRCA	ENSG00000145936	KCNMB1	cg17425484	chr5:170390243	CGI:chr5:170503865-170504467	promoter	0.499197	0.32599	2.31237	0.0207571	0.0354866	0.173207	443.215	-1.82905	0.402357	-4.54583	5.47192e-06	0.000228975
BRCA	ENSG00000113763	UNC5A	cg02616808	chr5:176809653	CGI:chr5:176809760-176811080	promoter	0.0784502	0.225168	-2.32847	0.019887	0.034876	-0.146718	536.108	-1.80309	0.574619	-3.13788	0.00170172	0.0166428
BRCA	ENSG00000113763	UNC5A	cg22338352	chr5:176810378	CGI:chr5:176809760-176811080	promoter	0.141049	0.32699	-2.24213	0.0249533	0.0380457	-0.185942	536.108	-1.80309	0.574619	-3.13788	0.00170172	0.0166428
BRCA	ENSG00000113763	UNC5A	cg12893143	chr5:176810995	CGI:chr5:176809760-176811080	gene body,promoter	0.113419	0.321126	-1.98015	0.0476863	0.0490657	-0.207707	536.108	-1.80309	0.574619	-3.13788	0.00170172	0.0166428
BRCA	ENSG00000160867	FGFR4	cg23197992	chr5:177087066	CGI:chr5:177086650-177087432	gene body,UTR,exon,promoter	0.0504189	0.192616	-2.20993	0.0271102	0.0393024	-0.142197	1212.52	-2.88563	0.557933	-5.172	2.31607e-07	1.98959e-05
BRCA	ENSG00000234284	ZNF879	cg23951258	chr5:179023505	CGI:chr5:179023629-179024215	promoter	0.167258	0.415679	-3.63248	0.000280714	0.00395396	-0.248422	261.689	-1.14874	0.255377	-4.49821	6.85289e-06	0.00027332
BRCA	ENSG00000234284	ZNF879	cg25396971	chr5:179023594	CGI:chr5:179023629-179024215	promoter	0.147234	0.367393	-3.02511	0.0024854	0.0151247	-0.220159	261.689	-1.14874	0.255377	-4.49821	6.85289e-06	0.00027332
BRCA	ENSG00000234284	ZNF879	cg04681963	chr5:179024077	CGI:chr5:179023629-179024215	gene body,promoter	0.121376	0.360011	-2.6402	0.00828559	0.0248594	-0.238635	261.689	-1.14874	0.255377	-4.49821	6.85289e-06	0.00027332
BRCA	ENSG00000234284	ZNF879	cg01312482	chr5:179024175	CGI:chr5:179023629-179024215	gene body,promoter	0.408164	0.625879	-2.6285	0.00857632	0.0252022	-0.217715	261.689	-1.14874	0.255377	-4.49821	6.85289e-06	0.00027332
BRCA	ENSG00000177932	ZNF354C	cg08522107	chr5:179060122	CGI:chr5:179060145-179060920	promoter	0.0882822	0.231782	-2.61679	0.00887614	0.0255309	-0.1435	437.385	-1.29895	0.282355	-4.60041	4.21653e-06	0.000188825
BRCA	ENSG00000177932	ZNF354C	cg07470489	chr5:179060464	CGI:chr5:179060145-179060920	gene body,UTR,exon,promoter	0.105561	0.390145	-4.00568	6.18402e-05	0.00113568	-0.284584	437.385	-1.29895	0.282355	-4.60041	4.21653e-06	0.000188825
BRCA	ENSG00000177932	ZNF354C	cg11538128	chr5:179060480	CGI:chr5:179060145-179060920	gene body,UTR,exon,promoter	0.133413	0.461246	-3.89006	0.00010022	0.00168441	-0.327833	437.385	-1.29895	0.282355	-4.60041	4.21653e-06	0.000188825
BRCA	ENSG00000177932	ZNF354C	cg08278489	chr5:179060484	CGI:chr5:179060145-179060920	gene body,UTR,exon,promoter	0.159784	0.478726	-3.75541	0.000173056	0.00267372	-0.318942	437.385	-1.29895	0.282355	-4.60041	4.21653e-06	0.000188825
BRCA	ENSG00000177932	ZNF354C	cg04488521	chr5:179060715	CGI:chr5:179060145-179060920	gene body,promoter	0.22224	0.409806	-3.26367	0.0010998	0.00996351	-0.187566	437.385	-1.29895	0.282355	-4.60041	4.21653e-06	0.000188825
BRCA	ENSG00000161055	SCGB3A1	cg07317366	chr5:180590846	CGI:chr5:180590099-180592062	gene body,exon,promoter	0.300826	0.515012	-2.41043	0.0159337	0.0320156	-0.214186	394.737	-3.81965	0.773273	-4.93958	7.82908e-07	5.06848e-05
BRCA	ENSG00000161055	SCGB3A1	cg21919857	chr5:180591102	CGI:chr5:180590099-180592062	gene body,exon,promoter	0.266336	0.482692	-2.2831	0.0224242	0.0365351	-0.216356	394.737	-3.81965	0.773273	-4.93958	7.82908e-07	5.06848e-05
BRCA	ENSG00000161055	SCGB3A1	cg06732395	chr5:180591722	CGI:chr5:180590099-180592062	promoter	0.41805	0.627361	-2.89779	0.00375807	0.018155	-0.209311	394.737	-3.81965	0.773273	-4.93958	7.82908e-07	5.06848e-05
BRCA	ENSG00000129824	RPS4Y1	cg08673225	chrY:2840931	CGI:chrY:2789761-2790058	promoter	0.0274652	0.867427	3.69395	0.000220801	0.00326743	-0.839962	168.139	11.5221	1.52832	7.53907	4.73344e-14	5.63848e-11
KIRC	ENSG00000173698	GPR64	cg04301343	chrX:19122540	CGI:chrX:19121819-19122976	gene body,UTR,exon,promoter	0.366638	0.23045	9.49852	2.12894e-21	2.69116e-20	0.136188	501.771	1.50158	0.1666	9.01311	2.00294e-19	4.9403e-17
KIRC	ENSG00000187726	DNAJB13	cg20071670	chr11:73950850	CGI:chr11:73982657-73983757	gene body,UTR,exon,promoter	0.768698	0.522915	8.08939	5.99631e-16	6.6305e-15	0.245783	235.256	1.88643	0.15708	12.0094	3.17253e-33	2.16696e-30
KIRC	ENSG00000183479	TREX2	cg23181142	chrX:153470461	CGI:chrX:153470326-153470971	gene body,UTR,exon,promoter	0.152037	0.0230242	14.5876	3.36878e-48	1.13434e-46	0.129013	201.839	2.11248	0.139056	15.1916	4.01914e-52	5.49045e-49
KIRC	ENSG00000196188	CTSE	cg13434570	chr1:206024234	CGI:chr1:206117302-206117793	promoter	0.828485	0.693836	5.98318	2.18819e-09	1.97556e-08	0.134649	236.969	2.48502	0.194362	12.7855	1.97485e-37	1.52484e-34
KIRC	ENSG00000196188	CTSE	cg21478437	chr1:206023964	CGI:chr1:206117302-206117793	promoter	0.824639	0.696912	6.93091	4.18129e-12	4.14623e-11	0.127727	236.969	2.48502	0.194362	12.7855	1.97485e-37	1.52484e-34
KIRC	ENSG00000111319	SCNN1A	cg20366549	chr12:6376957	CGI:chr12:6383723-6384356	gene body,promoter	0.475942	0.346206	5.67143	1.41612e-08	1.23785e-07	0.129736	2817.05	1.63978	0.18261	8.97965	2.71636e-19	6.51889e-17
KIRC	ENSG00000187726	DNAJB13	cg19692710	chr11:73950875	CGI:chr11:73982657-73983757	gene body,UTR,exon,promoter	0.842493	0.66115	9.07204	1.16808e-19	1.42031e-18	0.181343	235.256	1.88643	0.15708	12.0094	3.17253e-33	2.16696e-30
KIRC	ENSG00000064205	WISP2	cg03562120	chr20:44715356	CGI:chr20:44745708-44746249	gene body,UTR,exon,promoter	0.646293	0.532851	5.19257	2.07406e-07	1.69975e-06	0.113443	385.392	1.63917	0.199355	8.22236	1.99535e-16	3.85167e-14
KIRC	ENSG00000188373	C10orf99	cg07798731	chr10:84172540	CGI:chr10:84194443-84195547	promoter	0.729536	0.492495	10.2293	1.46618e-24	1.9863e-23	0.237041	1113.67	3.64046	0.2521	14.4405	2.87707e-47	3.40626e-44
KIRC	ENSG00000188373	C10orf99	cg04126866	chr10:84173007	CGI:chr10:84194443-84195547	promoter	0.804002	0.617504	10.5473	5.22997e-26	7.30596e-25	0.186499	1113.67	3.64046	0.2521	14.4405	2.87707e-47	3.40626e-44
KIRC	ENSG00000188373	C10orf99	cg22952459	chr10:84173028	CGI:chr10:84194443-84195547	promoter	0.768775	0.560321	10.8079	3.15862e-27	4.52836e-26	0.208454	1113.67	3.64046	0.2521	14.4405	2.87707e-47	3.40626e-44
KIRC	ENSG00000188373	C10orf99	cg10737718	chr10:84173830	CGI:chr10:84194443-84195547	gene body,UTR,exon,promoter	0.6815	0.549243	7.85246	4.07957e-15	4.3999e-14	0.132257	1113.67	3.64046	0.2521	14.4405	2.87707e-47	3.40626e-44
LUAD	ENSG00000204616	TRIM31	cg00120932	chr6:30111659	CGI:chr6:30103448-30103651	gene body,CDS,exon,promoter	0.685054	0.545455	4.69531	2.66208e-06	2.40013e-05	0.139598	490.359	1.30918	0.171696	7.62498	2.4407e-14	7.24928e-12
LUAD	ENSG00000198681	MAGEA1	cg10066681	chrX:153179227	CGI:chrX:153126233-153127047	promoter	0.892217	0.775431	6.48049	9.14234e-11	1.19266e-09	0.116786	90.7907	2.92235	0.433048	6.74833	1.49552e-11	2.83528e-09
LUAD	ENSG00000198681	MAGEA1	cg05031352	chrX:153179220	CGI:chrX:153126233-153127047	promoter	0.879599	0.760368	6.6228	3.52469e-11	4.67217e-10	0.11923	90.7907	2.92235	0.433048	6.74833	1.49552e-11	2.83528e-09
LUAD	ENSG00000204616	TRIM31	cg02907402	chr6:30111648	CGI:chr6:30103448-30103651	gene body,exon,promoter	0.691793	0.590306	5.3124	1.08191e-07	1.20364e-06	0.101487	490.359	1.30918	0.171696	7.62498	2.4407e-14	7.24928e-12
LGG	ENSG00000067646	ZFY	cg04840163	chrY:2936279	CGI:chrY:2934923-2936242	gene body,promoter	0.984348	0.052078	19.2942	6.0139e-83	1.50762e-81	0.93227	419.082	8.26982	0.143747	57.5302	0	0
LGG	ENSG00000154620	TMSB4Y	cg26198148	chrY:13702805	CGI:chrY:13703608-13703899	promoter	0.03449	0.894752	19.626	9.2791e-86	3.09233e-84	-0.860262	122.581	7.16764	0.101726	70.4602	0	0
LGG	ENSG00000198692	EIF1AY	cg01988452	chrY:20574642	CGI:chrY:20575939-20576166	promoter	0.0904351	0.606867	17.6557	9.19511e-70	1.43532e-68	-0.516432	682.174	7.72796	0.176244	43.848	0	0
HNSC	ENSG00000184368	MAP7D2	cg22657475	chrX:20117167	CGI:chrX:20116085-20117232	promoter	0.778835	0.650464	7.7109	1.24931e-14	1.87414e-13	0.128371	307.06	1.16268	0.252972	4.59607	4.30531e-06	0.000135575
LUSC	ENSG00000133124	IRS4	cg06779802	chrX:108736171	CGI:chrX:108735789-108736915	gene body,CDS,exon,promoter	0.572685	0.088845	14.1828	1.17007e-45	2.61579e-44	0.48384	97.4564	1.76301	0.319189	5.52342	3.32464e-08	5.43216e-06
LUSC	ENSG00000133124	IRS4	cg24754154	chrX:108736354	CGI:chrX:108735789-108736915	gene body,UTR,exon,promoter	0.254275	0.036889	13.7703	3.8444e-43	7.0605e-42	0.217386	97.4564	1.76301	0.319189	5.52342	3.32464e-08	5.43216e-06
LUSC	ENSG00000133124	IRS4	cg05893072	chrX:108736470	CGI:chrX:108735789-108736915	promoter	0.31181	0.0246205	14.235	5.55932e-46	1.30097e-44	0.28719	97.4564	1.76301	0.319189	5.52342	3.32464e-08	5.43216e-06
LUSC	ENSG00000133124	IRS4	cg06443888	chrX:108736902	CGI:chrX:108735789-108736915	promoter	0.474116	0.0651112	14.0376	9.17971e-45	1.86638e-43	0.409004	97.4564	1.76301	0.319189	5.52342	3.32464e-08	5.43216e-06
LUSC	ENSG00000133124	IRS4	cg01980778	chrX:108734528	CGI:chrX:108734980-108735592	gene body,CDS,exon,promoter	0.634901	0.761274	-7.20675	5.73041e-13	5.03957e-12	-0.126374	97.4564	1.76301	0.319189	5.52342	3.32464e-08	5.43216e-06
LUSC	ENSG00000133124	IRS4	cg18381576	chrX:108735250	CGI:chrX:108734980-108735592	gene body,CDS,exon,promoter	0.374154	0.179822	12.0515	1.90369e-33	2.62219e-32	0.194331	97.4564	1.76301	0.319189	5.52342	3.32464e-08	5.43216e-06
LUSC	ENSG00000133124	IRS4	cg10293967	chrX:108735323	CGI:chrX:108734980-108735592	gene body,CDS,exon,promoter	0.519323	0.242121	12.7402	3.53653e-37	5.30207e-36	0.277202	97.4564	1.76301	0.319189	5.52342	3.32464e-08	5.43216e-06
LUSC	ENSG00000133124	IRS4	cg14699015	chrX:108735667	CGI:chrX:108734980-108735592	gene body,CDS,exon,promoter	0.401237	0.192976	13.2558	4.17626e-40	6.81969e-39	0.208261	97.4564	1.76301	0.319189	5.52342	3.32464e-08	5.43216e-06
LUSC	ENSG00000133124	IRS4	cg08416046	chrX:108736339	CGI:chrX:108735789-108736915	gene body,CDS,exon,promoter	0.272441	0.0656812	13.9322	4.03544e-44	7.81774e-43	0.20676	97.4564	1.76301	0.319189	5.52342	3.32464e-08	5.43216e-06
LUSC	ENSG00000133124	IRS4	cg00538420	chrX:108736758	CGI:chrX:108735789-108736915	promoter	0.255985	0.0730612	14.0575	6.9254e-45	1.42467e-43	0.182924	97.4564	1.76301	0.319189	5.52342	3.32464e-08	5.43216e-06
LUSC	ENSG00000133124	IRS4	cg18161489	chrX:108736914	CGI:chrX:108735789-108736915	promoter	0.411874	0.195867	14.0598	6.71176e-45	1.38241e-43	0.216007	97.4564	1.76301	0.319189	5.52342	3.32464e-08	5.43216e-06
LUSC	ENSG00000133124	IRS4	cg13082192	chrX:108737128	CGI:chrX:108735789-108736915	promoter	0.396971	0.173571	13.3323	1.50161e-40	2.48991e-39	0.2234	97.4564	1.76301	0.319189	5.52342	3.32464e-08	5.43216e-06
SKCM	ENSG00000129824	RPS4Y1	cg25443613	chrY:2841564	CGI:chrY:2789761-2790058	gene body,UTR,exon,promoter	0.19112	0.0714649	16.4503	8.34243e-61	1.52663e-59	0.119655	7672.66	9.4322	0.161605	58.3657	0	0
BLCA	ENSG00000204538	PSORS1C2	cg25380351	chr6:31138404	CGI:chr6:31158308-31158784	gene body,promoter	0.63075	0.52768	3.66379	0.000248514	0.00156673	0.10307	1111	1.64024	0.311195	5.27076	1.35857e-07	2.44116e-05
BLCA	ENSG00000130234	ACE2	cg21598868	chrX:15603044	CGI:chrX:15646618-15647055	promoter	0.760198	0.870554	-8.76893	1.80367e-18	2.0789e-17	-0.110356	202.603	-1.22415	0.225715	-5.42344	5.84638e-08	1.18675e-05
STAD	ENSG00000099399	MAGEB2	cg11291200	chrX:30215373	CGI:chrX:30247055-30247438	promoter	0.646182	0.802551	-8.95757	3.31899e-19	3.71199e-18	-0.15637	44.3058	-1.95916	0.420197	-4.66247	3.12439e-06	0.000427576
STAD	ENSG00000238269	PAGE2B	cg00675244	chrX:55073663	CGI:chrX:54999926-55000552	promoter	0.641893	0.751736	-7.81321	5.57499e-15	5.20057e-14	-0.109843	7.25106	-1.73357	0.413578	-4.19165	2.76939e-05	0.00260659
LIHC	ENSG00000140465	CYP1A1	cg22549041	chr15:74726910	CGI:chr15:74725845-74726995	promoter	0.387131	0.214618	4.74957	2.03847e-06	2.67348e-05	0.172512	2982.6	2.02133	0.326396	6.19289	5.90704e-10	5.0083e-08
LIHC	ENSG00000123243	ITIH5	cg25575628	chr10:7667676	CGI:chr10:7666706-7667140	promoter	0.507623	0.252822	3.11271	0.00185381	0.00570339	0.254801	1136.82	-2.76051	0.259509	-10.6374	1.99524e-26	2.03996e-23
LIHC	ENSG00000106236	NPTX2	cg20266316	chr7:98618275	CGI:chr7:98616493-98618447	gene body,promoter	0.197875	0.298192	-4.47352	7.69411e-06	8.71576e-05	-0.100318	577.812	-1.55149	0.324181	-4.78588	1.70242e-06	4.17344e-05
LIHC	ENSG00000181019	NQO1	cg05191006	chr16:69727063	CGI:chr16:69726390-69726603	promoter	0.288121	0.176391	3.09839	0.00194574	0.00589642	0.11173	9339.78	1.25231	0.270879	4.62312	3.78015e-06	7.96397e-05
LIHC	ENSG00000140465	CYP1A1	cg13570656	chr15:74726855	CGI:chr15:74725845-74726995	promoter	0.362871	0.18604	4.98677	6.13971e-07	8.77002e-06	0.17683	2982.6	2.02133	0.326396	6.19289	5.90704e-10	5.0083e-08
LIHC	ENSG00000140465	CYP1A1	cg12101586	chr15:74726862	CGI:chr15:74725845-74726995	promoter	0.348535	0.189241	5.10332	3.33739e-07	4.91356e-06	0.159294	2982.6	2.02133	0.326396	6.19289	5.90704e-10	5.0083e-08
LIHC	ENSG00000140465	CYP1A1	cg26516004	chr15:74727035	CGI:chr15:74725845-74726995	promoter	0.647757	0.523122	3.76398	0.000167233	0.00103264	0.124635	2982.6	2.02133	0.326396	6.19289	5.90704e-10	5.0083e-08
LIHC	ENSG00000112183	RBM24	cg15753394	chr6:17282550	CGI:chr6:17280508-17282103	gene body,promoter	0.632383	0.499795	3.57994	0.000343668	0.00175578	0.132589	304.303	1.00831	0.176509	5.7125	1.11328e-08	6.04687e-07
LIHC	ENSG00000163082	SGPP2	cg19416417	chr2:222425605	CGI:chr2:222424203-222425294	gene body,promoter	0.394775	0.278414	4.12386	3.72572e-05	0.000326794	0.116361	145.589	-1.25794	0.258756	-4.86148	1.16511e-06	3.01226e-05
LIHC	ENSG00000156966	B3GNT7	cg26146617	chr2:231395594	CGI:chr2:231395389-231396423	gene body,UTR,exon,promoter	0.302069	0.410091	-3.46952	0.000521381	0.00236236	-0.108022	146.046	-1.32672	0.185123	-7.16669	7.68335e-13	1.37674e-10
LIHC	ENSG00000184956	MUC6	cg26226988	chr11:1037923	CGI:chr11:1036420-1036827	promoter	0.493338	0.380455	3.35093	0.00080542	0.00321234	0.112883	317.57	-2.03152	0.334438	-6.07443	1.24432e-09	9.20321e-08
LIHC	ENSG00000129757	CDKN1C	cg21741284	chr11:2886806	CGI:chr11:2883793-2885894	promoter	0.4743	0.355275	1.97682	0.0480624	0.0487412	0.119024	359.842	-1.18849	0.186539	-6.37124	1.87507e-10	1.85173e-08
LIHC	ENSG00000168065	SLC22A11	cg21039563	chr11:64556344	CGI:chr11:64562048-64562353	gene body,CDS,exon,promoter	0.84154	0.710211	4.50317	6.69463e-06	7.7306e-05	0.131329	985.242	1.2599	0.304645	4.13565	3.53952e-05	0.000486327
LIHC	ENSG00000106236	NPTX2	cg18952796	chr7:98617321	CGI:chr7:98616493-98618447	gene body,UTR,exon,promoter	0.322075	0.442424	-3.51553	0.000438874	0.00209024	-0.120349	577.812	-1.55149	0.324181	-4.78588	1.70242e-06	4.17344e-05
LIHC	ENSG00000091482	SMPX	cg24805886	chrX:21758282	CGI:chrX:21839473-21840086	promoter	0.757706	0.897517	-5.98259	2.19617e-09	3.81012e-08	-0.139811	57.0298	1.46073	0.264051	5.532	3.16607e-08	1.45967e-06
LIHC	ENSG00000068985	PAGE1	cg10796634	chrX:49696002	CGI:chrX:49598934-49599547	promoter	0.383451	0.281486	-3.84577	0.000120175	0.000809275	0.101965	45.7259	1.3836	0.528386	2.61854	0.00883059	0.0361922
LIHC	ENSG00000114270	COL7A1	cg14957943	chr3:48595350	CGI:chr3:48594449-48595468	promoter	0.299755	0.407923	-4.53896	5.65331e-06	6.67285e-05	-0.108168	960.352	1.1919	0.226127	5.27094	1.35725e-07	4.92729e-06
LIHC	ENSG00000197273	GUCA2A	cg06003187	chr1:42164127	CGI:chr1:42145814-42146020	gene body,promoter	0.656805	0.551222	4.37537	1.21225e-05	0.000128905	0.105583	30.6749	-1.06799	0.3531	-3.02462	0.0024895	0.0137715
LIHC	ENSG00000137959	IFI44L	cg03607951	chr1:78619901	CGI:chr1:78490939-78491831	promoter	0.582452	0.419089	2.04941	0.0404224	0.0437024	0.163363	547.659	1.28681	0.192873	6.67181	2.52667e-11	3.18232e-09
LIHC	ENSG00000135821	GLUL	cg00383081	chr1:182392953	CGI:chr1:182390562-182392428	promoter	0.794467	0.652338	4.82319	1.41284e-06	1.90751e-05	0.142129	164212	1.05253	0.21637	4.86448	1.14761e-06	2.98155e-05
LIHC	ENSG00000196188	CTSE	cg17330097	chr1:206024691	CGI:chr1:206117302-206117793	promoter	0.780117	0.67557	4.90804	9.19888e-07	1.27888e-05	0.104547	68.6692	1.5845	0.345033	4.5923	4.38377e-06	8.98519e-05
LIHC	ENSG00000196188	CTSE	cg02290880	chr1:206023513	CGI:chr1:206117302-206117793	gene body,promoter	0.669544	0.564317	4.7874	1.68955e-06	2.25294e-05	0.105227	68.6692	1.5845	0.345033	4.5923	4.38377e-06	8.98519e-05
LIHC	ENSG00000140465	CYP1A1	cg05549655	chr15:74726802	CGI:chr15:74725845-74726995	promoter	0.309023	0.176965	4.90907	9.15106e-07	1.27284e-05	0.132058	2982.6	2.02133	0.326396	6.19289	5.90704e-10	5.0083e-08
LIHC	ENSG00000140465	CYP1A1	cg17852385	chr15:74726847	CGI:chr15:74725845-74726995	promoter	0.428204	0.267088	4.97143	6.64596e-07	9.43019e-06	0.161116	2982.6	2.02133	0.326396	6.19289	5.90704e-10	5.0083e-08
LIHC	ENSG00000140465	CYP1A1	cg11924019	chr15:74726942	CGI:chr15:74725845-74726995	promoter	0.459682	0.332444	5.15138	2.58581e-07	3.85417e-06	0.127239	2982.6	2.02133	0.326396	6.19289	5.90704e-10	5.0083e-08
LIHC	ENSG00000140465	CYP1A1	cg18092474	chr15:74726961	CGI:chr15:74725845-74726995	promoter	0.484744	0.301332	5.40187	6.59514e-08	1.03932e-06	0.183413	2982.6	2.02133	0.326396	6.19289	5.90704e-10	5.0083e-08
LIHC	ENSG00000140505	CYP1A2	cg11473616	chr15:74748809	CGI:chr15:74725845-74726995	promoter	0.643412	0.529346	3.08919	0.00200703	0.00602416	0.114066	3269.04	1.90967	0.358534	5.32632	1.00223e-07	3.82257e-06
LIHC	ENSG00000112183	RBM24	cg02066331	chr6:17282547	CGI:chr6:17280508-17282103	gene body,promoter	0.640205	0.524534	3.92245	8.76536e-05	0.000638297	0.11567	304.303	1.00831	0.176509	5.7125	1.11328e-08	6.04687e-07
LIHC	ENSG00000146038	DCDC2	cg13833328	chr6:24356870	CGI:chr6:24357491-24358081	gene body,promoter	0.675038	0.788211	-3.16587	0.0015462	0.00504244	-0.113173	1607.02	-1.6281	0.22979	-7.08517	1.38877e-12	2.24123e-10
LIHC	ENSG00000146038	DCDC2	cg08126211	chr6:24357492	CGI:chr6:24357491-24358081	gene body,CDS,exon,promoter	0.406742	0.509284	-3.58506	0.000337006	0.00173163	-0.102542	1607.02	-1.6281	0.22979	-7.08517	1.38877e-12	2.24123e-10
LIHC	ENSG00000146038	DCDC2	cg04515001	chr6:24358008	CGI:chr6:24357491-24358081	gene body,UTR,exon,promoter	0.429029	0.564254	-3.73637	0.000186695	0.001122	-0.135225	1607.02	-1.6281	0.22979	-7.08517	1.38877e-12	2.24123e-10
LIHC	ENSG00000146038	DCDC2	cg16306115	chr6:24358078	CGI:chr6:24357491-24358081	promoter	0.397814	0.498607	-3.01558	0.00256491	0.00710643	-0.100793	1607.02	-1.6281	0.22979	-7.08517	1.38877e-12	2.24123e-10
LIHC	ENSG00000146038	DCDC2	cg07054208	chr6:24358338	CGI:chr6:24357491-24358081	promoter	0.474574	0.613432	-2.17721	0.0294651	0.0357678	-0.138858	1607.02	-1.6281	0.22979	-7.08517	1.38877e-12	2.24123e-10
LIHC	ENSG00000096433	ITPR3	cg08355863	chr6:33619719	CGI:chr6:33620840-33622132	promoter	0.627376	0.521302	5.06652	4.0516e-07	5.91308e-06	0.106075	591.194	-1.00567	0.203877	-4.93274	8.10849e-07	2.22644e-05
LIHC	ENSG00000137251	TINAG	cg00012148	chr6:54308199	CGI:chr6:53794456-53796174	gene body,promoter	0.805446	0.701936	-2.2089	0.0271815	0.0339314	0.10351	255.102	1.21914	0.411547	2.96233	0.0030532	0.0161153
LIHC	ENSG00000137251	TINAG	cg11975980	chr6:54308518	CGI:chr6:53794456-53796174	gene body,UTR,exon,promoter	0.779757	0.651564	5.04402	4.55841e-07	6.61181e-06	0.128193	255.102	1.21914	0.411547	2.96233	0.0030532	0.0161153
LIHC	ENSG00000163082	SGPP2	cg10091265	chr2:222423612	CGI:chr2:222424203-222425294	promoter	0.592305	0.473021	4.57679	4.72173e-06	5.69011e-05	0.119284	145.589	-1.25794	0.258756	-4.86148	1.16511e-06	3.01226e-05
LIHC	ENSG00000163082	SGPP2	cg16171484	chr2:222425796	CGI:chr2:222424203-222425294	gene body,promoter	0.604271	0.479911	4.64733	3.36256e-06	4.20525e-05	0.12436	145.589	-1.25794	0.258756	-4.86148	1.16511e-06	3.01226e-05
LIHC	ENSG00000109205	ODAM	cg23449588	chr4:70198129	CGI:chr4:70688137-70688756	gene body,CDS,exon,promoter	0.761591	0.659596	4.79558	1.62204e-06	2.17019e-05	0.101995	224.206	1.8469	0.456119	4.04917	5.13993e-05	0.000660289
LIHC	ENSG00000173432	SAA1	cg24015472	chr11:18265995	CGI:chr11:18322078-18322917	promoter	0.580023	0.455201	5.75459	8.68501e-09	1.45731e-07	0.124821	55655.4	1.82829	0.298923	6.11625	9.58038e-10	7.53469e-08
LIHC	ENSG00000019505	SYT13	cg11946449	chr11:45287125	CGI:chr11:45285890-45286424	promoter	0.484773	0.382666	3.41125	0.000646665	0.00274942	0.102107	313.177	-2.39953	0.361857	-6.63117	3.33031e-11	4.07635e-09
LIHC	ENSG00000124920	MYRF	cg04237003	chr11:61754530	CGI:chr11:61752269-61752882	gene body,promoter	0.598571	0.705545	-5.24442	1.56779e-07	2.38762e-06	-0.106974	2894.29	-1.03436	0.114374	-9.04373	1.51421e-19	9.07534e-17
LIHC	ENSG00000021300	PLEKHB1	cg25288155	chr11:73646351	CGI:chr11:73660755-73661587	gene body,UTR,exon,promoter	0.506148	0.405865	4.33959	1.4275e-05	0.00014794	0.100283	265.763	-1.23566	0.262227	-4.71218	2.45082e-06	5.56105e-05
LIHC	ENSG00000021300	PLEKHB1	cg02201052	chr11:73646696	CGI:chr11:73660755-73661587	gene body,promoter	0.56788	0.465039	4.79865	1.5974e-06	2.13945e-05	0.102842	265.763	-1.23566	0.262227	-4.71218	2.45082e-06	5.56105e-05
LIHC	ENSG00000170962	PDGFD	cg12686407	chr11:104165214	CGI:chr11:104163808-104164330	promoter	0.52133	0.415218	3.36319	0.000770462	0.0031143	0.106112	472.664	-1.13536	0.152707	-7.43489	1.04654e-13	2.27374e-11
LIHC	ENSG00000165478	HEPACAM	cg09763790	chr11:124936277	CGI:chr11:124920918-124921458	gene body,UTR,exon,promoter	0.686854	0.575709	4.45001	8.5867e-06	9.59703e-05	0.111144	437.012	1.54672	0.405012	3.81895	0.000134021	0.00142038
LIHC	ENSG00000160181	TFF2	cg11158374	chr21:42351555	CGI:chr21:42305765-42306206	promoter	0.620679	0.519455	3.90813	9.30114e-05	0.000667427	0.101224	36.9933	1.22265	0.422448	2.8942	0.00380126	0.0192455
LIHC	ENSG00000160181	TFF2	cg00355325	chr21:42351814	CGI:chr21:42305765-42306206	promoter	0.705944	0.593058	3.95005	7.81338e-05	0.000585049	0.112886	36.9933	1.22265	0.422448	2.8942	0.00380126	0.0192455
LIHC	ENSG00000108602	ALDH3A1	cg15796819	chr17:19747877	CGI:chr17:19744728-19745179	gene body,promoter	0.411449	0.311244	6.15538	7.48995e-10	1.33182e-08	0.100205	7857.52	3.30726	0.339513	9.74121	2.01155e-22	1.66489e-19
LIHC	ENSG00000108602	ALDH3A1	cg27451508	chr17:19748944	CGI:chr17:19744728-19745179	promoter	0.786151	0.64999	6.92831	4.25889e-12	8.42763e-11	0.136161	7857.52	3.30726	0.339513	9.74121	2.01155e-22	1.66489e-19
LIHC	ENSG00000275152	CCL16	cg10190509	chr17:35981101	CGI:chr17:35930642-35930844	gene body,promoter	0.496974	0.361687	4.19441	2.73586e-05	0.000253885	0.135287	4544.9	1.0011	0.198306	5.04828	4.45812e-07	1.34769e-05
LIHC	ENSG00000171345	KRT19	cg12491114	chr17:41529272	CGI:chr17:41527656-41528347	promoter	0.506081	0.385209	3.35399	0.000796545	0.00318728	0.120873	1175.78	-1.88106	0.33382	-5.63496	1.75101e-08	8.97766e-07
LIHC	ENSG00000158516	CPA2	cg24060938	chr7:130267359	CGI:chr7:130205306-130205584	gene body,promoter	0.667646	0.559672	3.52882	0.000417412	0.00201771	0.107974	16.1793	2.6285	0.472513	5.56281	2.65467e-08	1.25383e-06
LIHC	ENSG00000238269	PAGE2B	cg00675244	chrX:55073663	CGI:chrX:54999926-55000552	promoter	0.61945	0.776249	-9.43013	4.09571e-21	1.10517e-19	-0.156799	27.6175	1.72513	0.428546	4.02554	5.68455e-05	0.000710303
LIHC	ENSG00000165376	CLDN2	cg10258730	chrX:106899631	CGI:chrX:106999276-107000363	promoter	0.335231	0.220163	7.85154	4.10951e-15	9.18787e-14	0.115068	4178.01	1.04805	0.2441	4.29354	1.75849e-05	0.000278617
LIHC	ENSG00000198033	TUBA3C	cg08756887	chr13:19180294	CGI:chr13:19177120-19177343	gene body,promoter	0.679987	0.576537	4.2854	1.82409e-05	0.00018152	0.10345	51.7856	1.67287	0.519806	3.21826	0.0012897	0.00814545
KIRP	ENSG00000170837	GPR27	cg13026730	chr3:71754988	CGI:chr3:71753409-71755058	gene body,CDS,exon,promoter	0.469625	0.34577	4.08449	4.41731e-05	0.000375504	0.123855	234.041	-1.35474	0.289962	-4.67211	2.98119e-06	5.05537e-05
KIRP	ENSG00000204385	SLC44A4	cg09298971	chr6:31878472	CGI:chr6:31889119-31889327	gene body,promoter	0.627447	0.474617	5.12437	2.98533e-07	3.36451e-06	0.15283	11230.5	1.05649	0.213246	4.95434	7.25755e-07	1.53986e-05
KIRP	ENSG00000170190	SLC16A5	cg04305621	chr17:75088168	CGI:chr17:75087771-75088400	gene body,promoter	0.522549	0.629175	-2.45828	0.0139603	0.0252588	-0.106626	675.881	-1.52726	0.211777	-7.21166	5.5274e-13	6.986e-11
KIRP	ENSG00000170837	GPR27	cg04087740	chr3:71754991	CGI:chr3:71753409-71755058	gene body,CDS,exon,promoter	0.482076	0.350299	4.27246	1.93324e-05	0.000177072	0.131777	234.041	-1.35474	0.289962	-4.67211	2.98119e-06	5.05537e-05
KIRP	ENSG00000142102	ATHL1	cg08829299	chr11:288305	CGI:chr11:288863-289474	promoter	0.302355	0.176762	3.81719	0.000134978	0.00099278	0.125593	21757.9	1.9616	0.244775	8.01388	1.11148e-15	2.29723e-13
KIRP	ENSG00000142102	ATHL1	cg10261205	chr11:289927	CGI:chr11:289771-290010	UTR,gene body,promoter,CDS,exon	0.848378	0.74193	4.9433	7.68121e-07	8.38136e-06	0.106447	21757.9	1.9616	0.244775	8.01388	1.11148e-15	2.29723e-13
KIRP	ENSG00000160282	FTCD	cg09436823	chr21:46155584	CGI:chr21:46160578-46162151	promoter	0.491456	0.334521	3.38089	0.000722502	0.0037819	0.156935	2772.68	1.35644	0.281294	4.82215	1.42016e-06	2.69432e-05
KIRP	ENSG00000160282	FTCD	cg18024037	chr21:46155590	CGI:chr21:46160578-46162151	promoter	0.613362	0.484912	3.47057	0.000519357	0.00295642	0.12845	2772.68	1.35644	0.281294	4.82215	1.42016e-06	2.69432e-05
KIRP	ENSG00000049283	EPN3	cg22290782	chr17:50531433	CGI:chr17:50536517-50537105	promoter	0.439945	0.315799	4.58805	4.47407e-06	4.53199e-05	0.124146	284.116	-1.02893	0.274291	-3.75124	0.000175963	0.00137389
KIRP	ENSG00000100053	CRYBB3	cg07068768	chr22:25199873	CGI:chr22:25178909-25179575	gene body,UTR,exon,promoter	0.460568	0.302384	3.33778	0.000844499	0.00425065	0.158183	40.8413	1.41669	0.227789	6.21929	4.99413e-10	3.10025e-08
KIRP	ENSG00000102359	SRPX2	cg05911774	chrX:100644348	CGI:chrX:100636302-100636797	gene body,UTR,exon,promoter	0.569416	0.738057	-4.86742	1.13065e-06	1.21888e-05	-0.168641	199.28	-1.45555	0.26557	-5.48084	4.23303e-08	1.41649e-06
KIRP	ENSG00000101938	CHRDL1	cg19777864	chrX:110795854	CGI:chrX:110795718-110796142	promoter	0.159159	0.042309	7.42831	1.09993e-13	1.60568e-12	0.116849	522.037	-1.00847	0.344313	-2.92895	0.00340112	0.0145841
KIRP	ENSG00000101938	CHRDL1	cg00619443	chrX:110796308	CGI:chrX:110795718-110796142	promoter	0.212338	0.0767832	3.13084	0.00174306	0.00706501	0.135555	522.037	-1.00847	0.344313	-2.92895	0.00340112	0.0145841
KIRP	ENSG00000101938	CHRDL1	cg23245147	chrX:110796314	CGI:chrX:110795718-110796142	promoter	0.200966	0.0756907	5.38305	7.32355e-08	8.57136e-07	0.125275	522.037	-1.00847	0.344313	-2.92895	0.00340112	0.0145841
KIRP	ENSG00000126895	AVPR2	cg19784262	chrX:153901279	CGI:chrX:153885562-153886765	promoter	0.669984	0.38374	-5.17093	2.32929e-07	2.64174e-06	0.286244	67.3891	-3.0763	0.297464	-10.3417	4.56192e-25	3.33932e-22
KIRP	ENSG00000126895	AVPR2	cg13423140	chrX:153902451	CGI:chrX:153885562-153886765	promoter	0.503209	0.323019	6.35567	2.07522e-10	2.7145e-09	0.180189	67.3891	-3.0763	0.297464	-10.3417	4.56192e-25	3.33932e-22
KIRP	ENSG00000117394	SLC2A1	cg05802386	chr1:42957249	CGI:chr1:42957796-42959097	gene body,promoter	0.669284	0.773874	-2.78766	0.00530895	0.0143692	-0.104591	5038.44	-1.36914	0.205301	-6.66894	2.57666e-11	2.15963e-09
KIRP	ENSG00000117394	SLC2A1	cg20282814	chr1:42957401	CGI:chr1:42957796-42959097	gene body,promoter	0.68404	0.794404	-3.16533	0.00154906	0.00651683	-0.110364	5038.44	-1.36914	0.205301	-6.66894	2.57666e-11	2.15963e-09
KIRP	ENSG00000213190	MLLT11	cg07139440	chr1:151058505	CGI:chr1:151059291-151059876	gene body,UTR,exon,promoter	0.454343	0.56359	-2.84285	0.00447123	0.0129288	-0.109247	366.787	-1.24725	0.156374	-7.97604	1.51104e-15	3.05127e-13
KIRP	ENSG00000133063	CHIT1	cg16311306	chr1:203275030	CGI:chr1:203273391-203273690	promoter	0.665465	0.507528	4.35869	1.30843e-05	0.000123687	0.157938	4987.34	1.2172	0.3306	3.68178	0.000231611	0.00171108
KIRP	ENSG00000204385	SLC44A4	cg11726150	chr6:31877395	CGI:chr6:31889119-31889327	gene body,promoter	0.523612	0.408129	4.10001	4.13125e-05	0.000353561	0.115483	11230.5	1.05649	0.213246	4.95434	7.25755e-07	1.53986e-05
KIRP	ENSG00000204385	SLC44A4	cg11943056	chr6:31877636	CGI:chr6:31889119-31889327	gene body,UTR,exon,promoter	0.494326	0.394272	3.23086	0.00123417	0.00557905	0.100054	11230.5	1.05649	0.213246	4.95434	7.25755e-07	1.53986e-05
KIRP	ENSG00000204385	SLC44A4	cg04567302	chr6:31879179	CGI:chr6:31889119-31889327	promoter	0.527881	0.378943	3.46367	0.000532857	0.00301413	0.148938	11230.5	1.05649	0.213246	4.95434	7.25755e-07	1.53986e-05
KIRP	ENSG00000204385	SLC44A4	cg03045620	chr6:31879193	CGI:chr6:31889119-31889327	promoter	0.48228	0.381259	3.66371	0.000248584	0.00165205	0.101021	11230.5	1.05649	0.213246	4.95434	7.25755e-07	1.53986e-05
KIRP	ENSG00000204385	SLC44A4	cg07363637	chr6:31879219	CGI:chr6:31889119-31889327	promoter	0.561483	0.452666	3.62405	0.000290025	0.00187336	0.108817	11230.5	1.05649	0.213246	4.95434	7.25755e-07	1.53986e-05
KIRP	ENSG00000204385	SLC44A4	cg24707219	chr6:31879232	CGI:chr6:31889119-31889327	promoter	0.626254	0.501587	3.92756	8.58108e-05	0.000673697	0.124667	11230.5	1.05649	0.213246	4.95434	7.25755e-07	1.53986e-05
KIRP	ENSG00000204385	SLC44A4	cg16553272	chr6:31879251	CGI:chr6:31889119-31889327	promoter	0.667764	0.56247	3.97585	7.01284e-05	0.000564636	0.105294	11230.5	1.05649	0.213246	4.95434	7.25755e-07	1.53986e-05
KIRP	ENSG00000204385	SLC44A4	cg24493649	chr6:31880145	CGI:chr6:31889119-31889327	promoter	0.804163	0.658826	5.74519	9.18161e-09	1.12365e-07	0.145337	11230.5	1.05649	0.213246	4.95434	7.25755e-07	1.53986e-05
KIRP	ENSG00000204385	SLC44A4	cg11785183	chr6:31880154	CGI:chr6:31889119-31889327	promoter	0.629884	0.500134	5.7383	9.56344e-09	1.16921e-07	0.12975	11230.5	1.05649	0.213246	4.95434	7.25755e-07	1.53986e-05
KIRP	ENSG00000204385	SLC44A4	cg19770715	chr6:31880251	CGI:chr6:31889119-31889327	promoter	0.844304	0.737019	5.47789	4.30416e-08	5.09923e-07	0.107285	11230.5	1.05649	0.213246	4.95434	7.25755e-07	1.53986e-05
KIRP	ENSG00000181577	C6orf223	cg10938046	chr6:44001840	CGI:chr6:44002187-44003185	gene body,promoter	0.708439	0.816578	-3.13257	0.00173286	0.00703456	-0.108139	54.6648	-1.21179	0.327851	-3.69615	0.000218895	0.0016371
KIRP	ENSG00000138356	AOX1	cg01217071	chr2:200585600	CGI:chr2:200585803-200586304	promoter	0.380398	0.270288	2.95149	0.00316242	0.0103857	0.11011	4281.52	1.75723	0.241241	7.28413	3.23754e-13	4.30888e-11
KIRP	ENSG00000138356	AOX1	cg27547291	chr2:200586303	CGI:chr2:200585803-200586304	gene body,promoter	0.370719	0.23295	6.47466	9.50261e-11	1.26042e-09	0.137769	4281.52	1.75723	0.241241	7.28413	3.23754e-13	4.30888e-11
KIRP	ENSG00000138356	AOX1	cg22953017	chr2:200586580	CGI:chr2:200585803-200586304	gene body,promoter	0.544703	0.368898	7.00408	2.48609e-12	3.48044e-11	0.175805	4281.52	1.75723	0.241241	7.28413	3.23754e-13	4.30888e-11
KIRP	ENSG00000148942	SLC5A12	cg17442194	chr11:26721856	CGI:chr11:26331990-26332265	gene body,UTR,exon,promoter	0.531322	0.401576	4.45181	8.51482e-06	8.29508e-05	0.129746	602.251	2.08678	0.342901	6.08566	1.16013e-09	6.42937e-08
KIRP	ENSG00000148942	SLC5A12	cg05953243	chr11:26721878	CGI:chr11:26331990-26332265	gene body,UTR,exon,promoter	0.454437	0.352017	3.91204	9.15187e-05	0.000712465	0.102419	602.251	2.08678	0.342901	6.08566	1.16013e-09	6.42937e-08
KIRP	ENSG00000151704	KCNJ1	cg04367216	chr11:128867306	CGI:chr11:128890546-128891338	gene body,UTR,exon,promoter	0.649366	0.539326	3.86031	0.000113244	0.000855896	0.11004	106.65	-2.42702	0.348189	-6.97041	3.16014e-12	3.40597e-10
KIRP	ENSG00000151704	KCNJ1	cg13675753	chr11:128867520	CGI:chr11:128890546-128891338	promoter	0.835766	0.682241	6.32635	2.51025e-10	3.27211e-09	0.153525	106.65	-2.42702	0.348189	-6.97041	3.16014e-12	3.40597e-10
KIRP	ENSG00000151704	KCNJ1	cg13267718	chr11:128867534	CGI:chr11:128890546-128891338	promoter	0.848409	0.695372	5.75209	8.81462e-09	1.07981e-07	0.153038	106.65	-2.42702	0.348189	-6.97041	3.16014e-12	3.40597e-10
KIRP	ENSG00000124253	PCK1	cg13655303	chr20:57559592	CGI:chr20:57524875-57525194	promoter	0.510766	0.364028	3.5223	0.000427813	0.0025447	0.146738	4839.38	1.45824	0.274206	5.31805	1.04882e-07	3.06585e-06
KIRP	ENSG00000165887	ANKRD2	cg10343327	chr10:97572051	CGI:chr10:97570203-97570447	promoter	0.65266	0.539598	4.01551	5.93166e-05	0.000486551	0.113062	925.218	2.07198	0.238597	8.68403	3.81999e-18	1.19839e-15
KIRP	ENSG00000160282	FTCD	cg04413147	chr21:46155220	CGI:chr21:46160578-46162151	gene body,promoter	0.777659	0.673548	2.75835	0.00580943	0.0151649	0.104111	2772.68	1.35644	0.281294	4.82215	1.42016e-06	2.69432e-05
KIRP	ENSG00000160282	FTCD	cg10394047	chr21:46155502	CGI:chr21:46160578-46162151	gene body,CDS,exon,promoter	0.557766	0.431614	3.37917	0.000727049	0.003799	0.126151	2772.68	1.35644	0.281294	4.82215	1.42016e-06	2.69432e-05
KIRP	ENSG00000131482	G6PC	cg05353659	chr17:42900641	CGI:chr17:42964332-42964534	promoter	0.573852	0.460905	2.83423	0.00459368	0.0131451	0.112947	118.981	1.60607	0.342835	4.68468	2.80402e-06	4.79193e-05
KIRP	ENSG00000049283	EPN3	cg02593766	chr17:50531316	CGI:chr17:50536517-50537105	promoter	0.600101	0.433771	6.00904	1.86622e-09	2.3566e-08	0.16633	284.116	-1.02893	0.274291	-3.75124	0.000175963	0.00137389
KIRP	ENSG00000170190	SLC16A5	cg09300114	chr17:75088234	CGI:chr17:75087771-75088400	gene body,promoter	0.58145	0.693331	-2.38068	0.0172807	0.0284121	-0.111881	675.881	-1.52726	0.211777	-7.21166	5.5274e-13	6.986e-11
KIRP	ENSG00000055118	KCNH2	cg02363526	chr7:150976924	CGI:chr7:150977649-150978330	gene body,promoter	0.364551	0.226405	4.04828	5.15957e-05	0.000430189	0.138146	941.777	1.31031	0.227911	5.74921	8.96635e-09	3.83262e-07
KIRP	ENSG00000055118	KCNH2	cg08309183	chr7:150977287	CGI:chr7:150977649-150978330	gene body,promoter	0.327281	0.215773	4.3173	1.57948e-05	0.000147287	0.111508	941.777	1.31031	0.227911	5.74921	8.96635e-09	3.83262e-07
KIRP	ENSG00000100053	CRYBB3	cg02629506	chr22:25199847	CGI:chr22:25178909-25179575	promoter	0.565443	0.435906	3.24983	0.00115473	0.00532881	0.129536	40.8413	1.41669	0.227789	6.21929	4.99413e-10	3.10025e-08
KIRP	ENSG00000100053	CRYBB3	cg25221625	chr22:25199988	CGI:chr22:25178909-25179575	gene body,promoter	0.516131	0.389547	3.31364	0.000920903	0.00452616	0.126584	40.8413	1.41669	0.227789	6.21929	4.99413e-10	3.10025e-08
KIRP	ENSG00000147223	RIPPLY1	cg16397077	chrX:106903579	CGI:chrX:106999276-107000363	promoter	0.817078	0.918704	-8.71307	2.95757e-18	4.9806e-17	-0.101626	56.6759	-3.0669	0.268158	-11.4369	2.73351e-30	2.66791e-27
KIRP	ENSG00000050767	COL23A1	cg23285825	chr5:178589594	CGI:chr5:178589557-178590669	gene body,promoter	0.506344	0.404414	4.47941	7.48512e-06	7.35187e-05	0.10193	2219.96	1.14285	0.187686	6.08913	1.13522e-09	6.33131e-08
KIRP	ENSG00000050767	COL23A1	cg18816996	chr5:178591185	CGI:chr5:178589557-178590669	promoter	0.568111	0.457571	3.98792	6.66548e-05	0.000540104	0.110541	2219.96	1.14285	0.187686	6.08913	1.13522e-09	6.33131e-08
SARC	ENSG00000111046	MYF6	cg05860723	chr12:80708707	CGI:chr12:80708255-80708937	gene body,promoter	0.552483	0.449493	2.90067	0.0037237	0.00930976	0.10299	30.0364	3.54918	0.505518	7.02086	2.205e-12	5.85575e-10
SARC	ENSG00000111049	MYF5	cg06376520	chr12:80716997	CGI:chr12:80716946-80717347	gene body,UTR,exon,promoter	0.668633	0.554498	3.98048	6.87771e-05	0.0003677	0.114135	32.3517	6.7557	0.957319	7.0569	1.70264e-12	4.79771e-10
SARC	ENSG00000164161	HHIP	cg07318204	chr4:144645289	CGI:chr4:144645090-144646120	promoter	0.513238	0.386918	3.19871	0.00138042	0.00447478	0.12632	353.251	-1.19767	0.343388	-3.48781	0.000486986	0.00535535
SARC	ENSG00000184363	PKP3	cg18011064	chr11:394289	CGI:chr11:394257-394619	gene body,UTR,exon,promoter	0.711962	0.557884	5.14009	2.74603e-07	2.03915e-06	0.154078	183.31	1.00719	0.270151	3.72826	0.00019281	0.00274234
SARC	ENSG00000052850	ALX4	cg06245037	chr11:44311388	CGI:chr11:44310764-44311207	promoter	0.48132	0.363915	3.10751	0.00188672	0.0056576	0.117406	251.909	-1.30621	0.339579	-3.84656	0.000119788	0.00194373
SARC	ENSG00000052850	ALX4	cg07704934	chr11:44311390	CGI:chr11:44310764-44311207	promoter	0.491924	0.390559	2.78829	0.00529873	0.0119477	0.101365	251.909	-1.30621	0.339579	-3.84656	0.000119788	0.00194373
SARC	ENSG00000149380	P4HA3	cg26758986	chr11:74311837	CGI:chr11:74311383-74311658	promoter	0.708686	0.598133	3.71012	0.000207163	0.000960599	0.110553	1579.67	1.21652	0.240262	5.0633	4.12071e-07	2.55469e-05
SARC	ENSG00000171345	KRT19	cg05396212	chr17:41527453	CGI:chr17:41527656-41528347	gene body,promoter	0.614866	0.503925	4.0782	4.53862e-05	0.000253828	0.11094	231.755	1.17654	0.296861	3.96327	7.39299e-05	0.00136315
SARC	ENSG00000171345	KRT19	cg17231690	chr17:41527786	CGI:chr17:41527656-41528347	gene body,promoter	0.28802	0.146821	2.9707	0.00297122	0.00790988	0.141199	231.755	1.17654	0.296861	3.96327	7.39299e-05	0.00136315
SARC	ENSG00000106004	HOXA5	cg11724970	chr7:27142874	CGI:chr7:27142994-27145943	gene body,promoter	0.674486	0.516085	4.65963	3.16772e-06	2.12077e-05	0.158401	480.442	1.25762	0.176539	7.12378	1.05007e-12	3.114e-10
SARC	ENSG00000106004	HOXA5	cg25307665	chr7:27144075	CGI:chr7:27142994-27145943	promoter	0.649126	0.458314	4.65149	3.29544e-06	2.20258e-05	0.190812	480.442	1.25762	0.176539	7.12378	1.05007e-12	3.114e-10
SARC	ENSG00000106004	HOXA5	cg14058329	chr7:27144327	CGI:chr7:27142994-27145943	promoter	0.871418	0.753382	4.9756	6.5047e-07	4.67464e-06	0.118036	480.442	1.25762	0.176539	7.12378	1.05007e-12	3.114e-10
SARC	ENSG00000106004	HOXA5	cg03368099	chr7:27144902	CGI:chr7:27142994-27145943	promoter	0.7152	0.574465	4.56028	5.10843e-06	3.33696e-05	0.140735	480.442	1.25762	0.176539	7.12378	1.05007e-12	3.114e-10
SARC	ENSG00000106004	HOXA5	cg01748892	chr7:27145048	CGI:chr7:27142994-27145943	promoter	0.6761	0.539089	5.22478	1.74359e-07	1.31717e-06	0.137011	480.442	1.25762	0.176539	7.12378	1.05007e-12	3.114e-10
SARC	ENSG00000101850	GPR143	cg05096731	chrX:9786554	CGI:chrX:9785526-9787061	promoter	0.176655	0.0535407	8.19223	2.56439e-16	3.02712e-15	0.123114	86.1908	-2.31048	0.278216	-8.30463	1.00134e-16	5.56774e-14
SARC	ENSG00000101850	GPR143	cg05782106	chrX:9786887	CGI:chrX:9785526-9787061	promoter	0.182235	0.0342919	10.474	1.13737e-25	2.20026e-24	0.147943	86.1908	-2.31048	0.278216	-8.30463	1.00134e-16	5.56774e-14
SARC	ENSG00000101955	SRPX	cg15727409	chrX:38220470	CGI:chrX:38220438-38220897	gene body,promoter	0.222613	0.0250339	13.1108	2.855e-39	1.34429e-37	0.197579	7706.77	1.00454	0.202459	4.96171	6.9877e-07	3.95661e-05
SARC	ENSG00000122824	NUDT10	cg07910525	chrX:51332730	CGI:chrX:51332628-51333479	gene body,promoter	0.338057	0.0449796	12.9382	2.74047e-38	1.16531e-36	0.293077	152.297	-1.14295	0.296309	-3.85731	0.000114641	0.00188175
SARC	ENSG00000165349	SLC7A3	cg11859529	chrX:70931072	CGI:chrX:70930825-70931152	gene body,UTR,exon,promoter	0.286058	0.0533688	12.189	3.55805e-34	1.15879e-32	0.232689	431.613	-2.5666	0.442167	-5.80458	6.45269e-09	7.38171e-07
SARC	ENSG00000174460	ZCCHC12	cg07809462	chrX:118823658	CGI:chrX:118823652-118823974	promoter	0.26777	0.03571	12.79	1.86546e-37	7.37474e-36	0.23206	74.9584	-2.64435	0.253298	-10.4397	1.63379e-25	1.93801e-22
SARC	ENSG00000174460	ZCCHC12	cg26620546	chrX:118823660	CGI:chrX:118823652-118823974	promoter	0.218833	0.0291272	12.702	5.76216e-37	2.20589e-35	0.189706	74.9584	-2.64435	0.253298	-10.4397	1.63379e-25	1.93801e-22
SARC	ENSG00000174460	ZCCHC12	cg20135706	chrX:118823671	CGI:chrX:118823652-118823974	promoter	0.225009	0.111438	10.5685	4.17291e-26	8.31427e-25	0.113571	74.9584	-2.64435	0.253298	-10.4397	1.63379e-25	1.93801e-22
SARC	ENSG00000174460	ZCCHC12	cg20113724	chrX:118823808	CGI:chrX:118823652-118823974	gene body,UTR,exon,promoter	0.335821	0.0272548	13.3421	1.31714e-40	7.41768e-39	0.308566	74.9584	-2.64435	0.253298	-10.4397	1.63379e-25	1.93801e-22
SARC	ENSG00000174460	ZCCHC12	cg02295369	chrX:118825300	CGI:chrX:118823652-118823974	gene body,CDS,exon,promoter	0.769281	0.583118	5.68733	1.29044e-08	1.0566e-07	0.186163	74.9584	-2.64435	0.253298	-10.4397	1.63379e-25	1.93801e-22
SARC	ENSG00000198354	DCAF12L2	cg16108684	chrX:126166052	CGI:chrX:126165262-126166453	promoter	0.49046	0.114638	12.158	5.1988e-34	1.68422e-32	0.375823	176.696	-1.18453	0.311978	-3.79686	0.000146543	0.00225
SARC	ENSG00000198354	DCAF12L2	cg27309655	chrX:126166099	CGI:chrX:126165262-126166453	promoter	0.313257	0.0571287	12.4105	2.29248e-35	7.93198e-34	0.256129	176.696	-1.18453	0.311978	-3.79686	0.000146543	0.00225
SARC	ENSG00000198354	DCAF12L2	cg25896901	chrX:126166498	CGI:chrX:126165262-126166453	promoter	0.392201	0.196273	8.65151	5.08217e-18	6.45739e-17	0.195928	176.696	-1.18453	0.311978	-3.79686	0.000146543	0.00225
SARC	ENSG00000147256	ARHGAP36	cg02864732	chrX:131058391	CGI:chrX:131058157-131058761	UTR,gene body,promoter,CDS,exon	0.411635	0.110451	11.7346	8.4736e-32	2.43847e-30	0.301184	30.2462	-1.61926	0.453954	-3.567	0.000361091	0.00426764
SARC	ENSG00000012817	KDM5D	cg15329860	chrY:19744750	CGI:chrY:19567257-19567670	gene body,UTR,exon,promoter	0.844444	0.0838786	13.5896	4.6129e-42	3.78205e-40	0.760565	1019.2	9.84726	0.213678	46.0846	0	0
SARC	ENSG00000196557	CACNA1H	cg09238049	chr16:1155018	CGI:chr16:1152414-1154624	gene body,promoter	0.359107	0.499027	-2.5049	0.0122486	0.0210266	-0.13992	2302.92	-1.09554	0.271109	-4.04096	5.32332e-05	0.00107268
SARC	ENSG00000103449	SALL1	cg08878368	chr16:51149452	CGI:chr16:51149788-51156349	gene body,promoter	0.503341	0.606439	-2.18731	0.02872	0.0360114	-0.103098	539.604	-1.12	0.370612	-3.02203	0.00251089	0.0168043
SARC	ENSG00000117115	PADI2	cg00569276	chr1:17120050	CGI:chr1:17119156-17119593	promoter	0.738671	0.637218	3.3567	0.0007888	0.00289535	0.101452	187.889	1.2507	0.222861	5.61204	1.99957e-08	1.99878e-06
SARC	ENSG00000118526	TCF21	cg12468478	chr6:133889135	CGI:chr6:133889501-133890080	promoter	0.400991	0.292635	2.65962	0.00782281	0.0156056	0.108356	1115.68	1.62413	0.384865	4.22001	2.44292e-05	0.000622735
SARC	ENSG00000118526	TCF21	cg24157171	chr6:133889169	CGI:chr6:133889501-133890080	gene body,UTR,exon,promoter	0.455463	0.314981	2.98536	0.00283247	0.00764267	0.140482	1115.68	1.62413	0.384865	4.22001	2.44292e-05	0.000622735
SARC	ENSG00000139219	COL2A1	cg08886711	chr12:48005397	CGI:chr12:48005385-48005589	promoter	0.548387	0.430031	3.86973	0.000108957	0.000552198	0.118357	1546.34	-3.56476	0.408659	-8.72307	2.70768e-18	2.05054e-15
SARC	ENSG00000139219	COL2A1	cg10502244	chr12:48005512	CGI:chr12:48005385-48005589	promoter	0.738343	0.596982	5.17267	2.30777e-07	1.7238e-06	0.141361	1546.34	-3.56476	0.408659	-8.72307	2.70768e-18	2.05054e-15
SARC	ENSG00000138083	SIX3	cg23808946	chr2:44942409	CGI:chr2:44942366-44944745	gene body,CDS,exon,promoter	0.234117	0.127727	3.22477	0.00126073	0.00417577	0.10639	79.0408	-2.05256	0.365874	-5.61001	2.02315e-08	1.99988e-06
SARC	ENSG00000138083	SIX3	cg19186145	chr2:44942423	CGI:chr2:44942366-44944745	gene body,CDS,exon,promoter	0.27433	0.149349	3.72966	0.000191737	0.000898197	0.124981	79.0408	-2.05256	0.365874	-5.61001	2.02315e-08	1.99988e-06
SARC	ENSG00000128714	HOXD13	cg07802350	chr2:176091845	CGI:chr2:176091776-176091979	promoter	0.526931	0.387303	3.12705	0.00176568	0.00537787	0.139629	270.594	-1.04593	0.315617	-3.31393	0.00091995	0.00835857
SARC	ENSG00000128714	HOXD13	cg10418524	chr2:176091950	CGI:chr2:176091776-176091979	promoter	0.440291	0.298728	2.95604	0.00311615	0.00819004	0.141563	270.594	-1.04593	0.315617	-3.31393	0.00091995	0.00835857
SARC	ENSG00000007062	PROM1	cg14736058	chr4:16083983	CGI:chr4:16082572-16084112	gene body,UTR,exon,promoter	0.329876	0.225256	2.15311	0.0313104	0.0379681	0.10462	536.024	-1.65537	0.376477	-4.39701	1.09751e-05	0.000343803
SARC	ENSG00000184363	PKP3	cg09671481	chr11:394262	CGI:chr11:394257-394619	gene body,UTR,exon,promoter	0.779748	0.653961	5.34368	9.108e-08	7.02946e-07	0.125787	183.31	1.00719	0.270151	3.72826	0.00019281	0.00274234
SARC	ENSG00000184363	PKP3	cg08616951	chr11:394545	CGI:chr11:394257-394619	gene body,promoter	0.703727	0.539307	4.43813	9.0742e-06	5.72746e-05	0.16442	183.31	1.00719	0.270151	3.72826	0.00019281	0.00274234
SARC	ENSG00000070031	SCT	cg25774643	chr11:627175	CGI:chr11:626728-628037	promoter	0.624918	0.479075	4.22966	2.3404e-05	0.000138207	0.145843	23.3457	1.13849	0.256786	4.43361	9.26677e-06	0.000303347
SARC	ENSG00000171345	KRT19	cg13002493	chr17:41527548	CGI:chr17:41527656-41528347	gene body,promoter	0.375525	0.186369	3.67592	0.000236998	0.00107859	0.189156	231.755	1.17654	0.296861	3.96327	7.39299e-05	0.00136315
SARC	ENSG00000106004	HOXA5	cg14974749	chr7:27141861	CGI:chr7:27142994-27145943	gene body,CDS,exon,promoter	0.866356	0.734964	4.0668	4.76638e-05	0.00026545	0.131391	480.442	1.25762	0.176539	7.12378	1.05007e-12	3.114e-10
SARC	ENSG00000106004	HOXA5	cg23936031	chr7:27143514	CGI:chr7:27142994-27145943	gene body,CDS,exon,promoter	0.640401	0.462891	4.32901	1.49779e-05	9.13604e-05	0.17751	480.442	1.25762	0.176539	7.12378	1.05007e-12	3.114e-10
SARC	ENSG00000106004	HOXA5	cg12015737	chr7:27144411	CGI:chr7:27142994-27145943	promoter	0.853264	0.726439	2.24594	0.0247078	0.0328586	0.126825	480.442	1.25762	0.176539	7.12378	1.05007e-12	3.114e-10
SARC	ENSG00000106004	HOXA5	cg14013695	chr7:27144557	CGI:chr7:27142994-27145943	promoter	0.826737	0.655914	4.73292	2.21308e-06	1.50871e-05	0.170823	480.442	1.25762	0.176539	7.12378	1.05007e-12	3.114e-10
SARC	ENSG00000106004	HOXA5	cg13694927	chr7:27145093	CGI:chr7:27142994-27145943	promoter	0.746197	0.620417	5.00328	5.63618e-07	4.07578e-06	0.12578	480.442	1.25762	0.176539	7.12378	1.05007e-12	3.114e-10
SARC	ENSG00000005073	HOXA11	cg05311410	chr7:27185904	CGI:chr7:27185431-27186010	promoter	0.419763	0.538005	-2.50001	0.0124189	0.0212131	-0.118242	787.703	-1.54433	0.250591	-6.16276	7.14881e-10	9.86037e-08
SARC	ENSG00000101955	SRPX	cg16998810	chrX:38220881	CGI:chrX:38220438-38220897	gene body,UTR,exon,promoter	0.343867	0.0311479	12.7867	1.94529e-37	7.68276e-36	0.312719	7706.77	1.00454	0.202459	4.96171	6.9877e-07	3.95661e-05
SARC	ENSG00000101955	SRPX	cg16626088	chrX:38220966	CGI:chrX:38220438-38220897	promoter	0.374213	0.0435825	12.5066	6.87189e-36	2.46305e-34	0.330631	7706.77	1.00454	0.202459	4.96171	6.9877e-07	3.95661e-05
SARC	ENSG00000101955	SRPX	cg19736094	chrX:38221074	CGI:chrX:38220438-38220897	promoter	0.256945	0.112636	10.1466	3.42991e-24	6.06515e-23	0.144309	7706.77	1.00454	0.202459	4.96171	6.9877e-07	3.95661e-05
SARC	ENSG00000102109	PCSK1N	cg13120260	chrX:48835162	CGI:chrX:48834926-48835635	gene body,promoter	0.474638	0.0382807	13.3633	9.91218e-41	5.70286e-39	0.436357	601.051	-1.46112	0.326094	-4.48068	7.44062e-06	0.000255089
SARC	ENSG00000102109	PCSK1N	cg09434493	chrX:48835249	CGI:chrX:48834926-48835635	gene body,promoter	0.587952	0.211752	13.373	8.69204e-41	5.06657e-39	0.3762	601.051	-1.46112	0.326094	-4.48068	7.44062e-06	0.000255089
SARC	ENSG00000102109	PCSK1N	cg13130271	chrX:48835610	CGI:chrX:48834926-48835635	gene body,UTR,exon,promoter	0.579033	0.0652135	13.303	2.22358e-40	1.21456e-38	0.51382	601.051	-1.46112	0.326094	-4.48068	7.44062e-06	0.000255089
SARC	ENSG00000165349	SLC7A3	cg11024449	chrX:70930937	CGI:chrX:70930825-70931152	gene body,promoter	0.227381	0.0696911	9.75087	1.82901e-22	2.89628e-21	0.157689	431.613	-2.5666	0.442167	-5.80458	6.45269e-09	7.38171e-07
SARC	ENSG00000186462	NAP1L2	cg23483095	chrX:73214718	CGI:chrX:73079542-73080064	gene body,UTR,exon,promoter	0.242589	0.071419	10.6808	1.25136e-26	2.58217e-25	0.17117	130.293	-1.44793	0.287541	-5.03554	4.76504e-07	2.90357e-05
SARC	ENSG00000133124	IRS4	cg06779802	chrX:108736171	CGI:chrX:108735789-108736915	gene body,CDS,exon,promoter	0.537881	0.102099	12.0652	1.61249e-33	5.09169e-32	0.435782	44.2631	-3.11869	0.607125	-5.13682	2.79424e-07	1.85632e-05
SARC	ENSG00000133124	IRS4	cg24754154	chrX:108736354	CGI:chrX:108735789-108736915	gene body,UTR,exon,promoter	0.235918	0.0953101	8.64988	5.15522e-18	6.54605e-17	0.140607	44.2631	-3.11869	0.607125	-5.13682	2.79424e-07	1.85632e-05
SARC	ENSG00000133124	IRS4	cg05893072	chrX:108736470	CGI:chrX:108735789-108736915	promoter	0.229652	0.03387	12.1906	3.48765e-34	1.13632e-32	0.195782	44.2631	-3.11869	0.607125	-5.13682	2.79424e-07	1.85632e-05
SARC	ENSG00000133124	IRS4	cg06443888	chrX:108736902	CGI:chrX:108735789-108736915	promoter	0.407728	0.124461	10.1613	2.9514e-24	5.24922e-23	0.283268	44.2631	-3.11869	0.607125	-5.13682	2.79424e-07	1.85632e-05
SARC	ENSG00000174460	ZCCHC12	cg00018261	chrX:118823726	CGI:chrX:118823652-118823974	promoter	0.31882	0.0448317	12.3828	3.23837e-35	1.10705e-33	0.273988	74.9584	-2.64435	0.253298	-10.4397	1.63379e-25	1.93801e-22
SARC	ENSG00000174460	ZCCHC12	cg05397816	chrX:118823823	CGI:chrX:118823652-118823974	gene body,UTR,exon,promoter	0.36388	0.035595	13.3665	9.48764e-41	5.4823e-39	0.328285	74.9584	-2.64435	0.253298	-10.4397	1.63379e-25	1.93801e-22
SARC	ENSG00000198354	DCAF12L2	cg21484182	chrX:126166101	CGI:chrX:126165262-126166453	promoter	0.243235	0.0512974	11.6906	1.42351e-31	4.0397e-30	0.191938	176.696	-1.18453	0.311978	-3.79686	0.000146543	0.00225
SARC	ENSG00000198354	DCAF12L2	cg10991514	chrX:126166128	CGI:chrX:126165262-126166453	promoter	0.377588	0.0621011	12.4414	1.55683e-35	5.44565e-34	0.315487	176.696	-1.18453	0.311978	-3.79686	0.000146543	0.00225
SARC	ENSG00000147256	ARHGAP36	cg25548414	chrX:131058186	CGI:chrX:131058157-131058761	promoter	0.576739	0.280414	7.49678	6.54034e-14	6.9574e-13	0.296325	30.2462	-1.61926	0.453954	-3.567	0.000361091	0.00426764
SARC	ENSG00000129910	CDH15	cg08839312	chr16:89171589	CGI:chr16:89171536-89171923	promoter	0.569465	0.165222	11.5391	8.37495e-31	2.25412e-29	0.404243	226.395	2.20538	0.347841	6.34021	2.29446e-10	3.71139e-08
SARC	ENSG00000117115	PADI2	cg10233913	chr1:17119667	CGI:chr1:17119156-17119593	promoter	0.343727	0.233688	2.67754	0.00741653	0.0150538	0.110039	187.889	1.2507	0.222861	5.61204	1.99957e-08	1.99878e-06
SARC	ENSG00000124731	TREM1	cg21328082	chr6:41286733	CGI:chr6:41371498-41372289	promoter	0.413578	0.309752	3.47233	0.00051596	0.0020585	0.103826	272.647	1.0836	0.28246	3.8363	0.000124904	0.00200399
SARC	ENSG00000111424	VDR	cg07347128	chr12:47942577	CGI:chr12:47963412-47963724	gene body,promoter	0.733019	0.400309	10.5799	3.69507e-26	7.38062e-25	0.33271	1267.93	1.36352	0.230951	5.90394	3.54915e-09	4.29592e-07
SARC	ENSG00000138083	SIX3	cg02147764	chr2:44942542	CGI:chr2:44942366-44944745	gene body,CDS,exon,promoter	0.384076	0.245722	2.90392	0.00368517	0.00923746	0.138353	79.0408	-2.05256	0.365874	-5.61001	2.02315e-08	1.99988e-06
SARC	ENSG00000144218	AFF3	cg23497683	chr2:100142697	CGI:chr2:100103923-100105423	gene body,promoter	0.653146	0.538321	3.75246	0.000175106	0.000831851	0.114825	936.741	-1.11137	0.21818	-5.09383	3.50895e-07	2.22981e-05
SARC	ENSG00000170500	LONRF2	cg08297393	chr2:100321043	CGI:chr2:100321317-100322597	gene body,promoter	0.494186	0.626454	-3.55539	0.000377414	0.00159441	-0.132268	1797.55	-1.20261	0.315444	-3.81244	0.000137604	0.00214771
SARC	ENSG00000170500	LONRF2	cg05692746	chr2:100321122	CGI:chr2:100321317-100322597	gene body,promoter	0.487091	0.598768	-2.82738	0.00469311	0.0109738	-0.111677	1797.55	-1.20261	0.315444	-3.81244	0.000137604	0.00214771
SARC	ENSG00000239474	KLHL41	cg05389024	chr2:169509621	CGI:chr2:169479371-169479946	promoter	0.255764	0.362463	-3.03259	0.00242465	0.00681396	-0.106698	191.828	1.17259	0.257505	4.55366	5.27196e-06	0.00019341
SARC	ENSG00000109255	NMU	cg18174404	chr4:55637354	CGI:chr4:55635745-55636498	promoter	0.527001	0.421882	3.14008	0.00168901	0.00520708	0.105119	129.204	-1.19894	0.262456	-4.56814	4.92079e-06	0.000183941
SARC	ENSG00000110680	CALCA	cg25783352	chr11:14971963	CGI:chr11:14971906-14972115	gene body,promoter	0.307939	0.205184	3.215	0.00130444	0.00428678	0.102755	34.7948	-1.29574	0.37263	-3.47727	0.000506541	0.00551584
SARC	ENSG00000110680	CALCA	cg09068492	chr11:14972112	CGI:chr11:14971906-14972115	gene body,promoter	0.291367	0.189325	2.07982	0.0375425	0.0422317	0.102042	34.7948	-1.29574	0.37263	-3.47727	0.000506541	0.00551584
SARC	ENSG00000110680	CALCA	cg26833169	chr11:14972499	CGI:chr11:14971906-14972115	promoter	0.305152	0.204121	3.42999	0.000603613	0.00233971	0.10103	34.7948	-1.29574	0.37263	-3.47727	0.000506541	0.00551584
SARC	ENSG00000110680	CALCA	cg05061471	chr11:14973015	CGI:chr11:14973582-14974362	promoter	0.514684	0.396458	4.02282	5.75048e-05	0.000313844	0.118226	34.7948	-1.29574	0.37263	-3.47727	0.000506541	0.00551584
SARC	ENSG00000110680	CALCA	cg06796866	chr11:14973098	CGI:chr11:14973582-14974362	promoter	0.515121	0.362356	4.37787	1.19843e-05	7.41137e-05	0.152765	34.7948	-1.29574	0.37263	-3.47727	0.000506541	0.00551584
SARC	ENSG00000162344	FGF19	cg12004787	chr11:69705077	CGI:chr11:69702163-69705161	promoter	0.41501	0.29033	3.36647	0.000761376	0.00281383	0.12468	23.2637	-2.26441	0.615881	-3.67671	0.000236266	0.00315844
SARC	ENSG00000054938	CHRDL2	cg22902532	chr11:74729471	CGI:chr11:74731215-74731829	gene body,promoter	0.545533	0.649826	-3.1808	0.0014687	0.00468693	-0.104293	6858.49	-2.14615	0.37768	-5.68247	1.32764e-08	1.40125e-06
SARC	ENSG00000109061	MYH1	cg25650956	chr17:10518760	CGI:chr17:10638164-10638477	promoter	0.437534	0.538012	-3.272	0.00106788	0.00366912	-0.100478	82.4436	2.2541	0.36915	6.1062	1.02031e-09	1.38583e-07
SARC	ENSG00000141052	MYOCD	cg18181954	chr17:12664617	CGI:chr17:12665350-12666018	promoter	0.659989	0.762408	-3.00327	0.00267092	0.00731254	-0.102419	4328.8	-1.48758	0.413489	-3.59761	0.000321149	0.003949
SARC	ENSG00000171345	KRT19	cg11462865	chr17:41527872	CGI:chr17:41527656-41528347	gene body,CDS,exon,promoter	0.415778	0.293427	2.85832	0.00425889	0.0102447	0.122351	231.755	1.17654	0.296861	3.96327	7.39299e-05	0.00136315
SARC	ENSG00000171345	KRT19	cg02416424	chr17:41528573	CGI:chr17:41527656-41528347	promoter	0.477891	0.356375	3.11077	0.00186603	0.005612	0.121516	231.755	1.17654	0.296861	3.96327	7.39299e-05	0.00136315
SARC	ENSG00000106004	HOXA5	cg19701577	chr7:27141799	CGI:chr7:27142994-27145943	gene body,UTR,exon,promoter	0.877611	0.760425	4.23455	2.2901e-05	0.000135487	0.117186	480.442	1.25762	0.176539	7.12378	1.05007e-12	3.114e-10
SARC	ENSG00000106004	HOXA5	cg05076221	chr7:27143018	CGI:chr7:27142994-27145943	gene body,promoter	0.566993	0.438057	4.24106	2.22462e-05	0.000131896	0.128936	480.442	1.25762	0.176539	7.12378	1.05007e-12	3.114e-10
SARC	ENSG00000106004	HOXA5	cg02248486	chr7:27143577	CGI:chr7:27142994-27145943	gene body,CDS,exon,promoter	0.618369	0.441968	4.13357	3.57168e-05	0.000204052	0.1764	480.442	1.25762	0.176539	7.12378	1.05007e-12	3.114e-10
SARC	ENSG00000106004	HOXA5	cg25866143	chr7:27143643	CGI:chr7:27142994-27145943	gene body,UTR,exon,promoter	0.646574	0.50032	4.21989	2.44419e-05	0.000143826	0.146254	480.442	1.25762	0.176539	7.12378	1.05007e-12	3.114e-10
SARC	ENSG00000106004	HOXA5	cg09549073	chr7:27143655	CGI:chr7:27142994-27145943	gene body,UTR,exon,promoter	0.598527	0.436198	3.92184	8.78735e-05	0.000457363	0.162329	480.442	1.25762	0.176539	7.12378	1.05007e-12	3.114e-10
SARC	ENSG00000106004	HOXA5	cg01370449	chr7:27143750	CGI:chr7:27142994-27145943	promoter	0.619044	0.462928	4.09448	4.23109e-05	0.000238096	0.156116	480.442	1.25762	0.176539	7.12378	1.05007e-12	3.114e-10
SARC	ENSG00000106004	HOXA5	cg04863892	chr7:27143756	CGI:chr7:27142994-27145943	promoter	0.650895	0.491367	3.94139	8.10111e-05	0.000425221	0.159529	480.442	1.25762	0.176539	7.12378	1.05007e-12	3.114e-10
SARC	ENSG00000106004	HOXA5	cg19759481	chr7:27143782	CGI:chr7:27142994-27145943	promoter	0.597114	0.407315	4.29481	1.74842e-05	0.000105424	0.1898	480.442	1.25762	0.176539	7.12378	1.05007e-12	3.114e-10
SARC	ENSG00000106004	HOXA5	cg12128839	chr7:27143817	CGI:chr7:27142994-27145943	promoter	0.515147	0.348206	3.57819	0.000345975	0.00148365	0.166941	480.442	1.25762	0.176539	7.12378	1.05007e-12	3.114e-10
SARC	ENSG00000106004	HOXA5	cg02916332	chr7:27143972	CGI:chr7:27142994-27145943	promoter	0.651511	0.504756	4.4023	1.07108e-05	6.67496e-05	0.146755	480.442	1.25762	0.176539	7.12378	1.05007e-12	3.114e-10
SARC	ENSG00000106004	HOXA5	cg17569124	chr7:27144024	CGI:chr7:27142994-27145943	promoter	0.634846	0.453092	4.74758	2.05863e-06	1.40895e-05	0.181754	480.442	1.25762	0.176539	7.12378	1.05007e-12	3.114e-10
SARC	ENSG00000106004	HOXA5	cg02005600	chr7:27144067	CGI:chr7:27142994-27145943	promoter	0.699031	0.532576	4.86973	1.11749e-06	7.83767e-06	0.166455	480.442	1.25762	0.176539	7.12378	1.05007e-12	3.114e-10
SARC	ENSG00000106004	HOXA5	cg14014955	chr7:27144082	CGI:chr7:27142994-27145943	promoter	0.758695	0.618596	4.09286	4.26093e-05	0.00023959	0.140099	480.442	1.25762	0.176539	7.12378	1.05007e-12	3.114e-10
SARC	ENSG00000106004	HOXA5	cg02646423	chr7:27144175	CGI:chr7:27142994-27145943	promoter	0.604763	0.457783	4.48374	7.3347e-06	4.6937e-05	0.14698	480.442	1.25762	0.176539	7.12378	1.05007e-12	3.114e-10
SARC	ENSG00000106004	HOXA5	cg23204968	chr7:27144197	CGI:chr7:27142994-27145943	promoter	0.819302	0.671871	2.75897	0.00579835	0.0127261	0.147431	480.442	1.25762	0.176539	7.12378	1.05007e-12	3.114e-10
SARC	ENSG00000106004	HOXA5	cg05835726	chr7:27144242	CGI:chr7:27142994-27145943	promoter	0.759182	0.609476	4.62869	3.67988e-06	2.44642e-05	0.149706	480.442	1.25762	0.176539	7.12378	1.05007e-12	3.114e-10
SARC	ENSG00000106004	HOXA5	cg13512268	chr7:27144354	CGI:chr7:27142994-27145943	promoter	0.834534	0.710372	4.68081	2.85748e-06	1.92371e-05	0.124161	480.442	1.25762	0.176539	7.12378	1.05007e-12	3.114e-10
SARC	ENSG00000106004	HOXA5	cg23454797	chr7:27144371	CGI:chr7:27142994-27145943	promoter	0.804989	0.656931	4.92999	8.22323e-07	5.84966e-06	0.148057	480.442	1.25762	0.176539	7.12378	1.05007e-12	3.114e-10
SARC	ENSG00000106004	HOXA5	cg20817131	chr7:27144548	CGI:chr7:27142994-27145943	promoter	0.792842	0.643634	4.96908	6.72707e-07	4.8275e-06	0.149208	480.442	1.25762	0.176539	7.12378	1.05007e-12	3.114e-10
SARC	ENSG00000106004	HOXA5	cg25390165	chr7:27144569	CGI:chr7:27142994-27145943	promoter	0.768949	0.659161	4.71827	2.37863e-06	1.61674e-05	0.109789	480.442	1.25762	0.176539	7.12378	1.05007e-12	3.114e-10
SARC	ENSG00000106004	HOXA5	cg01323381	chr7:27144645	CGI:chr7:27142994-27145943	promoter	0.811088	0.683302	5.15149	2.58421e-07	1.92273e-06	0.127786	480.442	1.25762	0.176539	7.12378	1.05007e-12	3.114e-10
SARC	ENSG00000106004	HOXA5	cg19643053	chr7:27144652	CGI:chr7:27142994-27145943	promoter	0.826884	0.71571	4.19058	2.78247e-05	0.000162036	0.111174	480.442	1.25762	0.176539	7.12378	1.05007e-12	3.114e-10
SARC	ENSG00000106004	HOXA5	cg26023912	chr7:27144750	CGI:chr7:27142994-27145943	promoter	0.753689	0.652205	4.42185	9.78605e-06	6.1394e-05	0.101484	480.442	1.25762	0.176539	7.12378	1.05007e-12	3.114e-10
SARC	ENSG00000106004	HOXA5	cg14882265	chr7:27144756	CGI:chr7:27142994-27145943	promoter	0.773808	0.673503	3.89416	9.85406e-05	0.00050573	0.100306	480.442	1.25762	0.176539	7.12378	1.05007e-12	3.114e-10
SARC	ENSG00000106004	HOXA5	cg17432857	chr7:27144819	CGI:chr7:27142994-27145943	promoter	0.792392	0.664248	4.30458	1.673e-05	0.000101213	0.128144	480.442	1.25762	0.176539	7.12378	1.05007e-12	3.114e-10
SARC	ENSG00000106004	HOXA5	cg00969405	chr7:27144822	CGI:chr7:27142994-27145943	promoter	0.825493	0.710845	4.39905	1.08728e-05	6.76958e-05	0.114648	480.442	1.25762	0.176539	7.12378	1.05007e-12	3.114e-10
SARC	ENSG00000106004	HOXA5	cg03744763	chr7:27145118	CGI:chr7:27142994-27145943	promoter	0.703192	0.590698	4.87136	1.10832e-06	7.77879e-06	0.112493	480.442	1.25762	0.176539	7.12378	1.05007e-12	3.114e-10
SARC	ENSG00000005073	HOXA11	cg01729491	chr7:27186153	CGI:chr7:27185431-27186010	promoter	0.455966	0.566512	-2.91858	0.00351627	0.00893211	-0.110546	787.703	-1.54433	0.250591	-6.16276	7.14881e-10	9.86037e-08
SARC	ENSG00000005073	HOXA11	cg18978493	chr7:27186236	CGI:chr7:27185431-27186010	promoter	0.473948	0.590823	-2.94953	0.00318261	0.00832171	-0.116876	787.703	-1.54433	0.250591	-6.16276	7.14881e-10	9.86037e-08
SARC	ENSG00000005073	HOXA11	cg16038003	chr7:27186529	CGI:chr7:27185431-27186010	promoter	0.448519	0.571166	-3.21826	0.00128972	0.00424818	-0.122647	787.703	-1.54433	0.250591	-6.16276	7.14881e-10	9.86037e-08
SARC	ENSG00000005073	HOXA11	cg00705992	chr7:27186710	CGI:chr7:27185431-27186010	promoter	0.680826	0.798946	-2.73128	0.00630879	0.0134793	-0.11812	787.703	-1.54433	0.250591	-6.16276	7.14881e-10	9.86037e-08
SARC	ENSG00000101955	SRPX	cg00179598	chrX:38219106	CGI:chrX:38220438-38220897	gene body,promoter	0.707205	0.86531	-9.11731	7.70105e-20	1.05107e-18	-0.158104	7706.77	1.00454	0.202459	4.96171	6.9877e-07	3.95661e-05
SARC	ENSG00000101955	SRPX	cg26039373	chrX:38220408	CGI:chrX:38220438-38220897	gene body,promoter	0.371563	0.089408	13.202	8.54085e-40	4.31129e-38	0.282155	7706.77	1.00454	0.202459	4.96171	6.9877e-07	3.95661e-05
SARC	ENSG00000101955	SRPX	cg23750556	chrX:38220464	CGI:chrX:38220438-38220897	gene body,promoter	0.355241	0.0742931	13.2167	7.02967e-40	3.59851e-38	0.280948	7706.77	1.00454	0.202459	4.96171	6.9877e-07	3.95661e-05
SARC	ENSG00000101955	SRPX	cg14759284	chrX:38221050	CGI:chrX:38220438-38220897	promoter	0.191055	0.0733524	10.8307	2.46329e-27	5.32659e-26	0.117703	7706.77	1.00454	0.202459	4.96171	6.9877e-07	3.95661e-05
SARC	ENSG00000101955	SRPX	cg17407511	chrX:38221111	CGI:chrX:38220438-38220897	promoter	0.421041	0.207309	10.0522	8.98658e-24	1.54597e-22	0.213732	7706.77	1.00454	0.202459	4.96171	6.9877e-07	3.95661e-05
SARC	ENSG00000101955	SRPX	cg27485646	chrX:38221159	CGI:chrX:38220438-38220897	promoter	0.380768	0.117694	11.2948	1.39144e-29	3.46805e-28	0.263074	7706.77	1.00454	0.202459	4.96171	6.9877e-07	3.95661e-05
SARC	ENSG00000101955	SRPX	cg03509565	chrX:38221172	CGI:chrX:38220438-38220897	promoter	0.270122	0.101418	10.759	5.37417e-27	1.13446e-25	0.168704	7706.77	1.00454	0.202459	4.96171	6.9877e-07	3.95661e-05
SARC	ENSG00000102109	PCSK1N	cg17377054	chrX:48834995	CGI:chrX:48834926-48835635	gene body,promoter	0.357513	0.167072	5.64661	1.63643e-08	1.329e-07	0.190441	601.051	-1.46112	0.326094	-4.48068	7.44062e-06	0.000255089
SARC	ENSG00000102109	PCSK1N	cg07374632	chrX:48835263	CGI:chrX:48834926-48835635	gene body,promoter	0.520884	0.123348	13.2851	2.82531e-40	1.52035e-38	0.397535	601.051	-1.46112	0.326094	-4.48068	7.44062e-06	0.000255089
SARC	ENSG00000102109	PCSK1N	cg05083020	chrX:48835688	CGI:chrX:48834926-48835635	promoter	0.264159	0.0675053	12.8144	1.36187e-37	5.44592e-36	0.196654	601.051	-1.46112	0.326094	-4.48068	7.44062e-06	0.000255089
SARC	ENSG00000102109	PCSK1N	cg21798601	chrX:48835804	CGI:chrX:48834926-48835635	promoter	0.429461	0.227091	8.75738	1.99849e-18	2.57908e-17	0.202371	601.051	-1.46112	0.326094	-4.48068	7.44062e-06	0.000255089
SARC	ENSG00000102109	PCSK1N	cg17732141	chrX:48836045	CGI:chrX:48834926-48835635	promoter	0.565741	0.447505	4.17266	3.01063e-05	0.000174028	0.118237	601.051	-1.46112	0.326094	-4.48068	7.44062e-06	0.000255089
SARC	ENSG00000122824	NUDT10	cg16946997	chrX:51333478	CGI:chrX:51332628-51333479	gene body,promoter	0.468209	0.184097	10.7834	4.12156e-27	8.78396e-26	0.284112	152.297	-1.14295	0.296309	-3.85731	0.000114641	0.00188175
SARC	ENSG00000165349	SLC7A3	cg03604519	chrX:70930440	CGI:chrX:70930825-70931152	gene body,promoter	0.34248	0.228309	4.03422	5.47832e-05	0.000300634	0.114172	431.613	-2.5666	0.442167	-5.80458	6.45269e-09	7.38171e-07
SARC	ENSG00000165349	SLC7A3	cg10801213	chrX:70930872	CGI:chrX:70930825-70931152	gene body,promoter	0.242719	0.0637794	12.7183	4.67879e-37	1.80849e-35	0.178939	431.613	-2.5666	0.442167	-5.80458	6.45269e-09	7.38171e-07
SARC	ENSG00000165349	SLC7A3	cg20622056	chrX:70931284	CGI:chrX:70930825-70931152	promoter	0.375655	0.195253	8.86813	7.43877e-19	9.76714e-18	0.180401	431.613	-2.5666	0.442167	-5.80458	6.45269e-09	7.38171e-07
SARC	ENSG00000165349	SLC7A3	cg01758418	chrX:70931310	CGI:chrX:70930825-70931152	promoter	0.25844	0.128187	8.66454	4.53335e-18	5.77108e-17	0.130253	431.613	-2.5666	0.442167	-5.80458	6.45269e-09	7.38171e-07
SARC	ENSG00000186462	NAP1L2	cg16371598	chrX:73214161	CGI:chrX:73079542-73080064	gene body,CDS,exon,promoter	0.331596	0.148521	2.18242	0.0290784	0.0362955	0.183074	130.293	-1.44793	0.287541	-5.03554	4.76504e-07	2.90357e-05
SARC	ENSG00000186462	NAP1L2	cg20001978	chrX:73214825	CGI:chrX:73079542-73080064	gene body,UTR,exon,promoter	0.590376	0.225416	9.7981	1.14726e-22	1.84228e-21	0.36496	130.293	-1.44793	0.287541	-5.03554	4.76504e-07	2.90357e-05
SARC	ENSG00000186462	NAP1L2	cg04297329	chrX:73214884	CGI:chrX:73079542-73080064	promoter	0.309966	0.0892047	11.8242	2.92793e-32	8.65663e-31	0.220761	130.293	-1.44793	0.287541	-5.03554	4.76504e-07	2.90357e-05
SARC	ENSG00000186462	NAP1L2	cg02379437	chrX:73215281	CGI:chrX:73079542-73080064	promoter	0.271246	0.124758	-2.4935	0.0126491	0.0214645	0.146488	130.293	-1.44793	0.287541	-5.03554	4.76504e-07	2.90357e-05
SARC	ENSG00000000005	TNMD	cg00403724	chrX:100584292	CGI:chrX:100636302-100636797	promoter	0.533356	0.722776	-6.39906	1.5634e-10	1.42148e-09	-0.18942	174.62	-1.63575	0.311479	-5.25155	1.50826e-07	1.11627e-05
SARC	ENSG00000133124	IRS4	cg18381576	chrX:108735250	CGI:chrX:108734980-108735592	gene body,CDS,exon,promoter	0.380362	0.209854	8.0717	6.93237e-16	8.02549e-15	0.170508	44.2631	-3.11869	0.607125	-5.13682	2.79424e-07	1.85632e-05
SARC	ENSG00000133124	IRS4	cg10293967	chrX:108735323	CGI:chrX:108734980-108735592	gene body,CDS,exon,promoter	0.55998	0.304799	8.61079	7.25557e-18	9.1664e-17	0.25518	44.2631	-3.11869	0.607125	-5.13682	2.79424e-07	1.85632e-05
SARC	ENSG00000133124	IRS4	cg14699015	chrX:108735667	CGI:chrX:108734980-108735592	gene body,CDS,exon,promoter	0.378164	0.214826	8.62871	6.20476e-18	7.85875e-17	0.163338	44.2631	-3.11869	0.607125	-5.13682	2.79424e-07	1.85632e-05
SARC	ENSG00000133124	IRS4	cg08416046	chrX:108736339	CGI:chrX:108735789-108736915	gene body,CDS,exon,promoter	0.231637	0.105332	9.80787	1.04144e-22	1.67708e-21	0.126305	44.2631	-3.11869	0.607125	-5.13682	2.79424e-07	1.85632e-05
SARC	ENSG00000133124	IRS4	cg00538420	chrX:108736758	CGI:chrX:108735789-108736915	promoter	0.198891	0.0771419	9.01959	1.88791e-19	2.53981e-18	0.121749	44.2631	-3.11869	0.607125	-5.13682	2.79424e-07	1.85632e-05
SARC	ENSG00000133124	IRS4	cg18161489	chrX:108736914	CGI:chrX:108735789-108736915	promoter	0.356069	0.202188	9.62057	6.5466e-22	9.99028e-21	0.153881	44.2631	-3.11869	0.607125	-5.13682	2.79424e-07	1.85632e-05
SARC	ENSG00000133124	IRS4	cg13082192	chrX:108737128	CGI:chrX:108735789-108736915	promoter	0.371477	0.233487	6.8388	7.98601e-12	7.73298e-11	0.13799	44.2631	-3.11869	0.607125	-5.13682	2.79424e-07	1.85632e-05
SARC	ENSG00000077279	DCX	cg13936874	chrX:111411208	CGI:chrX:111624243-111624519	gene body,promoter	0.426043	0.546266	-3.56679	0.000361375	0.00153821	-0.120224	775.504	-2.45708	0.438823	-5.59925	2.15279e-08	2.08177e-06
SARC	ENSG00000077279	DCX	cg20585410	chrX:111411341	CGI:chrX:111624243-111624519	gene body,promoter	0.600096	0.713784	-5.89417	3.76574e-09	3.18627e-08	-0.113687	775.504	-2.45708	0.438823	-5.59925	2.15279e-08	2.08177e-06
SARC	ENSG00000077279	DCX	cg15334207	chrX:111411601	CGI:chrX:111624243-111624519	gene body,promoter	0.438492	0.546185	-3.68406	0.000229549	0.00104989	-0.107693	775.504	-2.45708	0.438823	-5.59925	2.15279e-08	2.08177e-06
SARC	ENSG00000174460	ZCCHC12	cg14936904	chrX:118823602	CGI:chrX:118823652-118823974	promoter	0.335219	0.177053	7.78343	7.05848e-15	7.83527e-14	0.158166	74.9584	-2.64435	0.253298	-10.4397	1.63379e-25	1.93801e-22
SARC	ENSG00000174460	ZCCHC12	cg11871549	chrX:118823653	CGI:chrX:118823652-118823974	promoter	0.277561	0.0658442	12.4235	1.94801e-35	6.76947e-34	0.211717	74.9584	-2.64435	0.253298	-10.4397	1.63379e-25	1.93801e-22
SARC	ENSG00000174460	ZCCHC12	cg01112452	chrX:118824569	CGI:chrX:118823652-118823974	gene body,promoter	0.568564	0.407006	5.06354	4.11532e-07	3.01308e-06	0.161559	74.9584	-2.64435	0.253298	-10.4397	1.63379e-25	1.93801e-22
SARC	ENSG00000198354	DCAF12L2	cg14243895	chrX:126166095	CGI:chrX:126165262-126166453	promoter	0.445629	0.115583	12.544	4.28574e-36	1.55567e-34	0.330047	176.696	-1.18453	0.311978	-3.79686	0.000146543	0.00225
SARC	ENSG00000147256	ARHGAP36	cg09407917	chrX:131058177	CGI:chrX:131058157-131058761	promoter	0.540844	0.327274	7.28505	3.21539e-13	3.31318e-12	0.213569	30.2462	-1.61926	0.453954	-3.567	0.000361091	0.00426764
SARC	ENSG00000147256	ARHGAP36	cg24813163	chrX:131058327	CGI:chrX:131058157-131058761	gene body,UTR,exon,promoter	0.373379	0.162059	9.57008	1.0682e-21	1.60767e-20	0.21132	30.2462	-1.61926	0.453954	-3.567	0.000361091	0.00426764
SARC	ENSG00000147256	ARHGAP36	cg05867448	chrX:131058601	CGI:chrX:131058157-131058761	gene body,promoter	0.432423	0.256496	7.5831	3.37389e-14	3.63454e-13	0.175928	30.2462	-1.61926	0.453954	-3.567	0.000361091	0.00426764
SARC	ENSG00000147256	ARHGAP36	cg08046324	chrX:131058760	CGI:chrX:131058157-131058761	gene body,promoter	0.34163	0.143797	10.3893	2.77364e-25	5.24124e-24	0.197834	30.2462	-1.61926	0.453954	-3.567	0.000361091	0.00426764
SARC	ENSG00000133110	POSTN	cg04922971	chr13:37598666	CGI:chr13:37869545-37870091	gene body,CDS,exon,promoter	0.312833	0.467141	4.05865	4.93565e-05	0.000273998	-0.154308	78957.5	1.20209	0.284692	4.22243	2.41678e-05	0.000617842
SARC	ENSG00000080709	KCNN2	cg01414464	chr5:114360161	CGI:chr5:114361143-114363498	promoter	0.545673	0.444728	2.38275	0.0171839	0.0261876	0.100945	195.373	-1.58131	0.239672	-6.59781	4.17269e-11	7.89836e-09
PCPG	ENSG00000125931	CITED1	cg06170215	chrX:72305302	CGI:chrX:72304982-72307449	gene body,promoter	0.235405	0.125009	7.8724	3.47897e-15	2.45411e-14	0.110396	480.02	1.16891	0.259303	4.50791	6.54687e-06	0.00149115
PCPG	ENSG00000125931	CITED1	cg23710475	chrX:72305863	CGI:chrX:72304982-72307449	gene body,UTR,exon,promoter	0.239945	0.106559	8.05502	7.94636e-16	5.82405e-15	0.133386	480.02	1.16891	0.259303	4.50791	6.54687e-06	0.00149115
PCPG	ENSG00000125931	CITED1	cg11871628	chrX:72308502	CGI:chrX:72304982-72307449	promoter	0.341236	0.237524	4.76502	1.88832e-06	8.89323e-06	0.103713	480.02	1.16891	0.259303	4.50791	6.54687e-06	0.00149115
PAAD	ENSG00000067048	DDX3Y	cg18077436	chrY:12904711	CGI:chrY:12904633-12905387	gene body,promoter	0.904643	0.140353	10.7815	4.20961e-27	9.02839e-26	0.764289	1153.01	7.29282	0.317095	22.9988	4.78709e-117	1.05298e-113
READ	ENSG00000087250	MT3	cg27295963	chr16:56589039	CGI:chr16:56589156-56590002	promoter	0.376462	0.479696	-2.46416	0.0137335	0.029728	-0.103234	79.9747	-1.44658	0.33525	-4.31493	1.59651e-05	0.00546952
READ	ENSG00000087250	MT3	cg06120945	chr16:56589048	CGI:chr16:56589156-56590002	promoter	0.261699	0.375599	-2.49987	0.0124238	0.0281877	-0.1139	79.9747	-1.44658	0.33525	-4.31493	1.59651e-05	0.00546952
ESCA	ENSG00000134202	GSTM3	cg00297950	chr1:109739903	CGI:chr1:109739729-109740684	gene body,CDS,exon,promoter	0.300374	0.19466	2.253	0.0242592	0.0408482	0.105714	6968.16	1.56301	0.443746	3.52231	0.000427808	0.0375769
ESCA	ENSG00000167434	CA4	cg05248618	chr17:60149906	CGI:chr17:60149880-60150359	promoter	0.32255	0.17963	2.67049	0.0075741	0.0224172	0.14292	96.1555	2.80351	0.651077	4.30596	1.66261e-05	0.00396068
ESCA	ENSG00000184368	MAP7D2	cg02223323	chrX:20116281	CGI:chrX:20116085-20117232	gene body,promoter	0.377158	0.257322	2.6273	0.00860655	0.024347	0.119836	387.46	2.64549	0.524879	5.04019	4.65075e-07	0.00027827
ESCA	ENSG00000078596	ITM2A	cg15682807	chrX:79367185	CGI:chrX:80335221-80335508	gene body,CDS,exon,promoter	0.412049	0.296767	2.30579	0.0211226	0.0387413	0.115282	693.164	-1.42015	0.296809	-4.78472	1.71224e-06	0.000697947
ESCA	ENSG00000134202	GSTM3	cg23645476	chr1:109739850	CGI:chr1:109739729-109740684	gene body,CDS,exon,promoter	0.255913	0.153952	2.43535	0.0148774	0.0331739	0.101961	6968.16	1.56301	0.443746	3.52231	0.000427808	0.0375769
ESCA	ENSG00000169507	SLC38A11	cg05090759	chr2:164955636	CGI:chr2:164840960-164842383	promoter	0.48544	0.339422	2.2674	0.0233661	0.0403677	0.146017	453.393	2.12707	0.454766	4.67729	2.90688e-06	0.00100606
ESCA	ENSG00000186895	FGF3	cg04602060	chr11:69817887	CGI:chr11:69817265-69819942	gene body,promoter	0.249478	0.148942	2.05625	0.0397582	0.0472063	0.100536	55.9249	-4.24898	0.873442	-4.86464	1.14666e-06	0.000513372
ESCA	ENSG00000173404	INSM1	cg09062550	chr20:20369837	CGI:chr20:20366809-20369961	gene body,UTR,exon,promoter	0.464353	0.328834	2.18582	0.028829	0.0432862	0.135519	94.9491	2.71649	0.561325	4.83942	1.30221e-06	0.000555498
ESCA	ENSG00000167434	CA4	cg23010302	chr17:60149904	CGI:chr17:60149880-60150359	promoter	0.34219	0.188102	2.78566	0.00534193	0.0176386	0.154088	96.1555	2.80351	0.651077	4.30596	1.66261e-05	0.00396068
ESCA	ENSG00000167434	CA4	cg04532952	chr17:60150384	CGI:chr17:60149880-60150359	gene body,promoter	0.280283	0.160084	2.27219	0.0230748	0.0401545	0.120199	96.1555	2.80351	0.651077	4.30596	1.66261e-05	0.00396068
ESCA	ENSG00000184368	MAP7D2	cg11721100	chrX:20116228	CGI:chrX:20116085-20117232	gene body,promoter	0.414599	0.271764	2.79525	0.00518588	0.0172685	0.142835	387.46	2.64549	0.524879	5.04019	4.65075e-07	0.00027827
ESCA	ENSG00000184368	MAP7D2	cg24001644	chrX:20116601	CGI:chrX:20116085-20117232	gene body,UTR,exon,promoter	0.411533	0.282598	2.75207	0.00592205	0.019003	0.128935	387.46	2.64549	0.524879	5.04019	4.65075e-07	0.00027827
ESCA	ENSG00000184368	MAP7D2	cg19731655	chrX:20116660	CGI:chrX:20116085-20117232	gene body,promoter	0.384612	0.245572	3.16956	0.00152672	0.00652754	0.13904	387.46	2.64549	0.524879	5.04019	4.65075e-07	0.00027827
ESCA	ENSG00000184368	MAP7D2	cg15870809	chrX:20116687	CGI:chrX:20116085-20117232	gene body,promoter	0.391649	0.193631	4.22527	2.3865e-05	0.000140242	0.198017	387.46	2.64549	0.524879	5.04019	4.65075e-07	0.00027827
ESCA	ENSG00000184368	MAP7D2	cg22657475	chrX:20117167	CGI:chrX:20116085-20117232	promoter	0.823846	0.697502	3.55345	0.000380209	0.00186963	0.126344	387.46	2.64549	0.524879	5.04019	4.65075e-07	0.00027827
ESCA	ENSG00000102109	PCSK1N	cg13120260	chrX:48835162	CGI:chrX:48834926-48835635	gene body,promoter	0.5971	0.240251	4.46041	8.18026e-06	5.09991e-05	0.356849	679.444	2.30914	0.54663	4.22432	2.39668e-05	0.00529666
ESCA	ENSG00000102109	PCSK1N	cg09434493	chrX:48835249	CGI:chrX:48834926-48835635	gene body,promoter	0.662029	0.37879	4.65716	3.20603e-06	2.08424e-05	0.283239	679.444	2.30914	0.54663	4.22432	2.39668e-05	0.00529666
ESCA	ENSG00000102109	PCSK1N	cg13130271	chrX:48835610	CGI:chrX:48834926-48835635	gene body,UTR,exon,promoter	0.647271	0.317471	3.63983	0.000272818	0.00137628	0.3298	679.444	2.30914	0.54663	4.22432	2.39668e-05	0.00529666
ESCA	ENSG00000075673	ATP12A	cg05719720	chr13:24680825	CGI:chr13:24680255-24680955	gene body,promoter	0.307871	0.198375	2.42575	0.0152766	0.0336478	0.109496	608.977	2.71847	0.629366	4.31938	1.56469e-05	0.00382681
ESCA	ENSG00000248485	PCP4L1	cg07369190	chr1:161259087	CGI:chr1:161258687-161259238	gene body,promoter	0.438812	0.338687	1.97467	0.0483052	0.0495292	0.100125	412.646	1.82682	0.50343	3.62873	0.000284814	0.0301985
ESCA	ENSG00000204335	SP5	cg27212729	chr2:170714328	CGI:chr2:170713367-170717394	promoter	0.193424	0.0891206	2.08984	0.0366319	0.046328	0.104303	412.64	1.89298	0.532717	3.55345	0.000380218	0.0357658
ESCA	ENSG00000167434	CA4	cg20604336	chr17:60149820	CGI:chr17:60149880-60150359	promoter	0.337873	0.234849	2.20021	0.0277917	0.0427839	0.103024	96.1555	2.80351	0.651077	4.30596	1.66261e-05	0.00396068
ESCA	ENSG00000102109	PCSK1N	cg07374632	chrX:48835263	CGI:chrX:48834926-48835635	gene body,promoter	0.60066	0.333731	3.54386	0.000394321	0.00193288	0.266929	679.444	2.30914	0.54663	4.22432	2.39668e-05	0.00529666
ESCA	ENSG00000102109	PCSK1N	cg05083020	chrX:48835688	CGI:chrX:48834926-48835635	promoter	0.302946	0.170543	4.35964	1.30278e-05	7.90837e-05	0.132403	679.444	2.30914	0.54663	4.22432	2.39668e-05	0.00529666
ESCA	ENSG00000102109	PCSK1N	cg21798601	chrX:48835804	CGI:chrX:48834926-48835635	promoter	0.495416	0.270453	4.62837	3.68561e-06	2.38364e-05	0.224963	679.444	2.30914	0.54663	4.22432	2.39668e-05	0.00529666
ESCA	ENSG00000102109	PCSK1N	cg17732141	chrX:48836045	CGI:chrX:48834926-48835635	promoter	0.641799	0.494773	3.50067	0.000464095	0.00224643	0.147026	679.444	2.30914	0.54663	4.22432	2.39668e-05	0.00529666
ESCA	ENSG00000186810	CXCR3	cg08843314	chrX:71618140	CGI:chrX:71603663-71604253	gene body,promoter	0.730432	0.882383	-5.15623	2.51977e-07	1.80888e-06	-0.151951	244.88	-1.2085	0.32898	-3.67349	0.000239262	0.0270676
ESCA	ENSG00000186810	CXCR3	cg17678039	chrX:71618626	CGI:chrX:71603663-71604253	promoter	0.509597	0.621855	-3.51506	0.000439649	0.00213636	-0.112258	244.88	-1.2085	0.32898	-3.67349	0.000239262	0.0270676
LAML	ENSG00000067048	DDX3Y	cg18077436	chrY:12904711	CGI:chrY:12904633-12905387	gene body,promoter	0.345909	0.0573682	9.68074	3.64062e-22	3.85165e-21	0.288541	3577.8	10.9417	0.159402	68.6423	0	0
LAML	ENSG00000198692	EIF1AY	cg01988452	chrY:20574642	CGI:chrY:20575939-20576166	promoter	0.81309	0.336393	9.23057	2.69208e-20	2.26365e-19	0.476697	643.621	11.1712	0.278627	40.0937	0	0
LAML	ENSG00000198692	EIF1AY	cg13308744	chrY:20574698	CGI:chrY:20575939-20576166	promoter	0.382797	0.218836	9.79617	1.16932e-22	1.43846e-21	0.163961	643.621	11.1712	0.278627	40.0937	0	0
LAML	ENSG00000198692	EIF1AY	cg10593480	chrY:20576885	CGI:chrY:20575939-20576166	gene body,promoter	0.140249	0.265518	9.00355	2.1853e-19	1.70914e-18	-0.125268	643.621	11.1712	0.278627	40.0937	0	0
THYM	ENSG00000173698	GPR64	cg17832062	chrX:19121860	CGI:chrX:19121819-19122976	gene body,promoter	0.21838	0.0346563	8.85156	8.63007e-19	7.89851e-18	0.183724	1376.93	-1.88256	0.316056	-5.95643	2.57814e-09	1.46339e-06
THYM	ENSG00000173698	GPR64	cg24000218	chrX:19122816	CGI:chrX:19121819-19122976	promoter	0.278551	0.0382442	9.25052	2.23396e-20	2.76231e-19	0.240307	1376.93	-1.88256	0.316056	-5.95643	2.57814e-09	1.46339e-06
THYM	ENSG00000173698	GPR64	cg15813836	chrX:19122975	CGI:chrX:19121819-19122976	promoter	0.193426	0.0431584	8.70262	3.24308e-18	2.76965e-17	0.150268	1376.93	-1.88256	0.316056	-5.95643	2.57814e-09	1.46339e-06
THYM	ENSG00000173698	GPR64	cg02859554	chrX:19122241	CGI:chrX:19121819-19122976	gene body,promoter	0.262925	0.0270307	9.39415	5.76824e-21	1.00223e-19	0.235894	1376.93	-1.88256	0.316056	-5.95643	2.57814e-09	1.46339e-06
THYM	ENSG00000173698	GPR64	cg16641638	chrX:19123133	CGI:chrX:19121819-19122976	promoter	0.364084	0.109592	8.21323	2.15315e-16	1.52844e-15	0.254492	1376.93	-1.88256	0.316056	-5.95643	2.57814e-09	1.46339e-06
THYM	ENSG00000182916	TCEAL7	cg13640071	chrX:103330219	CGI:chrX:103310386-103311106	gene body,UTR,exon,promoter	0.7124	0.522214	2.1597	0.0307962	0.0398717	0.190186	87.1563	1.53031	0.342773	4.4645	8.02546e-06	0.00179883
THYM	ENSG00000067048	DDX3Y	cg18077436	chrY:12904711	CGI:chrY:12904633-12905387	gene body,promoter	0.874151	0.128139	7.96322	1.67624e-15	1.08418e-14	0.746013	1425.72	9.78313	0.173943	56.2432	0	0
THYM	ENSG00000173698	GPR64	cg08744017	chrX:19120920	CGI:chrX:19121819-19122976	gene body,promoter	0.630116	0.801795	-5.33541	9.53298e-08	3.61231e-07	-0.17168	1376.93	-1.88256	0.316056	-5.95643	2.57814e-09	1.46339e-06
[truncated: 239 more rows]

## Sheet: Table 4
Cancer	Gene symbol	RNA_editing	Differential analysis result for each RNA editing site						Differential analysis result for each gene						RNA_editing position in gene
[truncated: 23 more rows]

[truncated: 7 more sheets: Table 5, Table 6, Table 7, Table 8, Table 9, Table 10, Table 11]
